# Supplementary material for: Urgency Promotes Affective Disengagement: Effects From Bivalent Cues on Preference Formation for Abstract Images
Source: Front Psychol. 2020 Jun 23;11:1404. doi: 10.3389/fpsyg.2020.01404 (PMC7325338; doi:10.3389/fpsyg.2020.01404)
Supplement: DATA SHEET S2 — Complete data set of gaze likelihood in the present study, organized in four Data Sheets: FACE_Deadline; FACE_Self-paced; FOOD_Deadline; and FOOD_Self-paced. [file Table_2.XLSX]

## Sheet: FACE_Deadline
DL																																				DL
CUED	S13	S14	S15	S16	S17	S18	S19	S20	S21	S22	S23	S24	S25	S26	S27	S28	S29	S31	S32	S33	S34	S35	S36	S37	S38	S39	S40	S41		AVE	T-test		bonferroni	time (ms)		UNCUED	S13	S14	S15	S16	S17	S18	S19	S20	S21	S22	S23	S24	S25
																																p<0.05	p<0.05/50
bin1	0.6067	0.55	0.453529	0.404762	0.436937	0.442029	0.611111	0.673982	0.407843	0.446078	0.432099	0.497653	0.505952	0.463529	0.40337	0.352941	0.509259	0.505954	0.585714	0.426471	0.462419	0.573333	0.551049	0.593023	0.508197	0.416667	0.484444	0.546667		0.494704	0.551956	FALSE	FALSE	50		bin1	0.479695	0.461557	0.541775	0.496212	0.53876	0.451923	0.438095	0.377965	0.590005	0.567766	0.526491	0.497942	0.497717
bin2	0.599942	0.555556	0.465409	0.409524	0.432432	0.456522	0.611111	0.655738	0.416325	0.460784	0.423868	0.488263	0.5	0.457875	0.429379	0.352941	0.532407	0.491228	0.585714	0.426471	0.473311	0.56	0.553846	0.580392	0.508197	0.434211	0.46432	0.591837		0.497057	0.622387	FALSE	FALSE	100		bin2	0.481544	0.445514	0.536539	0.496212	0.531008	0.475728	0.438095	0.388889	0.59204	0.56044	0.539474	0.487603	0.50463
bin3	0.611738	0.576132	0.481481	0.390476	0.436937	0.456522	0.611111	0.670192	0.422481	0.485294	0.425669	0.483568	0.5	0.458194	0.430038	0.373134	0.550926	0.487166	0.585714	0.426471	0.465909	0.533333	0.558353	0.580392	0.513843	0.434211	0.453684	0.585034		0.499572	0.69424	FALSE	FALSE	150		bin3	0.470561	0.443478	0.523812	0.507576	0.527132	0.466268	0.438095	0.40873	0.613916	0.56044	0.556505	0.483488	0.518519
bin4	0.634229	0.563786	0.478788	0.371429	0.432432	0.449275	0.611111	0.675627	0.414729	0.490196	0.45	0.478873	0.5	0.451852	0.449435	0.373134	0.541667	0.490447	0.585714	0.426471	0.467433	0.533333	0.556099	0.568627	0.502732	0.434211	0.444912	0.5625		0.497823	0.559256	FALSE	FALSE	200		bin4	0.490991	0.43379	0.527315	0.522727	0.523256	0.455128	0.438095	0.404762	0.651741	0.538462	0.54386	0.495935	0.511416
bin5	0.661017	0.539095	0.602954	0.361905	0.477477	0.478261	0.611111	0.666667	0.414729	0.504902	0.460545	0.511737	0.5	0.450549	0.633333	0.373134	0.550926	0.612418	0.585714	0.426471	0.444444	0.533333	0.568609	0.607843	0.518861	0.421053	0.458129	0.605349		0.520735	0.517511	FALSE	FALSE	250		bin5	0.466901	0.435177	0.573563	0.541667	0.554264	0.458333	0.450794	0.399225	0.656716	0.538462	0.552632	0.54065	0.522523
bin6	0.657468	0.555556	0.697531	0.366667	0.611502	0.586957	0.666667	0.693548	0.44186	0.514706	0.481481	0.684105	0.5	0.443622	0.777778	0.408609	0.568075	0.802721	0.614286	0.460784	0.444444	0.524444	0.615385	0.701961	0.564516	0.458874	0.458129	0.715278		0.572034	0.851043	FALSE	FALSE	300		bin6	0.488388	0.439228	0.634877	0.560606	0.657729	0.532051	0.501587	0.418605	0.676617	0.593407	0.535088	0.627388	0.527027
bin7	0.670635	0.553297	0.772611	0.371429	0.881279	0.630435	0.67284	0.689567	0.457364	0.544118	0.506173	0.8	0.511905	0.514493	0.871751	0.480952	0.58216	0.924745	0.690476	0.573529	0.476744	0.497778	0.615385	0.8	0.596774	0.484848	0.464912	0.909279		0.626624	0.93129	FALSE	FALSE	350		bin7	0.527717	0.444444	0.712107	0.587121	0.815686	0.583333	0.536508	0.46124	0.68964	0.615385	0.539474	0.746988	0.547575
bin8	0.696472	0.54878	0.860265	0.380952	0.96816	0.717391	0.697531	0.661458	0.486275	0.572139	0.522634	0.971429	0.511905	0.627847	0.932957	0.571429	0.596244	0.960513	0.771429	0.696078	0.503788	0.488889	0.611378	0.85098	0.61828	0.551282	0.464912	0.971779		0.671899	0.853151	FALSE	FALSE	400		bin8	0.557585	0.462963	0.836059	0.625	0.944911	0.608974	0.577778	0.484496	0.72549	0.6337	0.565789	0.851406	0.575342
bin9	0.708252	0.573171	0.903509	0.42381	0.972973	0.76087	0.722222	0.6875	0.545098	0.58209	0.530864	1	0.488095	0.698121	0.938606	0.604762	0.596244	0.974955	0.878659	0.733755	0.490377	0.497778	0.642468	0.87451	0.66129	0.576923	0.467248	0.972506		0.696666	0.621597	FALSE	FALSE	450		bin9	0.576524	0.470003	0.901866	0.655303	0.964286	0.605769	0.621795	0.565891	0.72549	0.663004	0.561404	0.915663	0.554985
bin10	0.703379	0.583177	0.962937	0.42957	0.973644	0.795652	0.705885	0.699421	0.560104	0.571568	0.529171	1	0.483932	0.741837	0.942226	0.616281	0.575082	0.962212	0.965051	0.747777	0.513776	0.513226	0.65895	0.898593	0.720942	0.581072	0.438182	0.975344		0.708893	0.649769	FALSE	FALSE	500		bin10	0.581602	0.508693	0.920917	0.665876	0.965318	0.610152	0.579388	0.631639	0.770351	0.697482	0.557373	0.934118	0.507448
bin11	0.716834	0.497299	0.975797	0.455733	0.99052	0.795894	0.633	0.733853	0.549238	0.598288	0.56985	1	0.464994	0.742689	0.941401	0.681924	0.626878	0.945874	0.959088	0.733324	0.492139	0.488688	0.661126	0.853022	0.703924	0.641689	0.468116	0.986105		0.710975	0.364124	FALSE	FALSE	550		bin11	0.623243	0.477983	0.897611	0.658983	0.964661	0.6317	0.685833	0.644319	0.688272	0.714479	0.590866	0.965875	0.533054
bin12	0.721565	0.552846	0.976396	0.457143	0.977477	0.782609	0.685185	0.730159	0.551724	0.606965	0.555556	1	0.461988	0.699935	0.95	0.647619	0.596244	0.894548	0.971014	0.746269	0.467433	0.511111	0.673504	0.814099	0.725806	0.640693	0.435897	0.959184		0.706892	0.4313	FALSE	FALSE	600		bin12	0.571479	0.481797	0.949698	0.666667	0.964142	0.63754	0.637821	0.643411	0.691542	0.723887	0.578947	0.963415	0.515982
bin13	0.672832	0.544715	0.947358	0.480952	0.981982	0.782609	0.666667	0.703704	0.555556	0.61194	0.55144	1	0.459266	0.660617	0.95	0.595238	0.600939	0.835129	0.970872	0.746269	0.461552	0.488889	0.666667	0.738095	0.704301	0.655234	0.431624	0.918367		0.692243	0.266767	FALSE	FALSE	650		bin13	0.570184	0.468468	0.95326	0.659091	0.960504	0.644013	0.602564	0.624943	0.636816	0.741573	0.578947	0.963415	0.520548
bin14	0.672551	0.52439	0.92803	0.485714	0.963964	0.782609	0.648148	0.715054	0.505747	0.606061	0.555556	1	0.467836	0.625926	0.944444	0.519048	0.600939	0.731074	0.984999	0.768883	0.490241	0.493333	0.668518	0.694444	0.693989	0.645299	0.42735	0.897959		0.680075	0.483654	FALSE	FALSE	700		bin14	0.563618	0.432432	0.933333	0.628788	0.957364	0.642871	0.567308	0.572549	0.59204	0.741573	0.609662	0.987805	0.502283
bin15	0.678788	0.527006	0.902357	0.487923	0.949957	0.746377	0.635802	0.709677	0.452107	0.606061	0.560185	0.990476	0.473684	0.604396	0.922222	0.504762	0.58216	0.716981	0.953125	0.763832	0.480619	0.471111	0.672222	0.68254	0.672131	0.636752	0.440171	0.88517		0.668164	0.514155	FALSE	FALSE	750		bin15	0.553634	0.42077	0.893277	0.606061	0.945736	0.653595	0.551282	0.556863	0.59204	0.731061	0.610585	0.987805	0.506849
bin16	0.674603	0.533333	0.805031	0.458937	0.899543	0.735178	0.623457	0.66129	0.444444	0.585859	0.55	0.995238	0.473684	0.593407	0.883333	0.409524	0.589604	0.622642	0.798397	0.69697	0.484496	0.462222	0.664901	0.558233	0.641371	0.593074	0.435897	0.846667		0.632905	0.60251	FALSE	FALSE	800		bin16	0.524211	0.401826	0.756636	0.587731	0.922481	0.63113	0.487179	0.517647	0.562189	0.719697	0.609649	0.987705	0.525304
bin17	0.661049	0.516667	0.674891	0.425121	0.86758	0.666667	0.611111	0.535078	0.413793	0.571406	0.545833	0.980745	0.479934	0.527473	0.783333	0.347826	0.566667	0.518406	0.497436	0.602176	0.478927	0.475556	0.626462	0.48996	0.580645	0.536797	0.440171	0.806667		0.579585	0.487109	FALSE	FALSE	850		bin17	0.525185	0.374429	0.606917	0.551724	0.891473	0.604686	0.474359	0.452381	0.532338	0.644908	0.577076	0.979424	0.52968
bin18	0.680012	0.512553	0.653846	0.439614	0.797297	0.601513	0.611111	0.49198	0.394636	0.518105	0.540463	0.913596	0.477206	0.487179	0.683333	0.356138	0.57619	0.508567	0.365625	0.563481	0.521385	0.506667	0.612133	0.449799	0.5	0.480235	0.448718	0.810884		0.553652	0.811221	FALSE	FALSE	900		bin18	0.516236	0.374429	0.553465	0.55217	0.848837	0.5625	0.464744	0.349206	0.517413	0.585271	0.575342	0.934156	0.499936
bin19	0.653448	0.50211	0.611514	0.468599	0.747748	0.603175	0.608665	0.446237	0.365755	0.428571	0.551282	0.847619	0.508475	0.487179	0.594444	0.352941	0.585714	0.488795	0.286458	0.537766	0.51341	0.537778	0.565496	0.457831	0.445443	0.438596	0.440171	0.795918		0.531112	0.790733	FALSE	FALSE	950		bin19	0.520062	0.365297	0.539402	0.546512	0.786138	0.524306	0.449084	0.297619	0.527665	0.562016	0.575342	0.884774	0.469484
bin20	0.643275	0.506329	0.576076	0.470872	0.707601	0.626016	0.603774	0.367442	0.361879	0.412698	0.555556	0.761905	0.516485	0.466829	0.511111	0.323529	0.557143	0.480692	0.23545	0.474747	0.524904	0.511111	0.564744	0.457831	0.377049	0.415837	0.454545	0.741497		0.50739	0.544562	FALSE	FALSE	1000		bin20	0.539515	0.388128	0.511766	0.539129	0.723666	0.50519	0.438095	0.278431	0.527363	0.548655	0.561644	0.781893	0.471764
bin21	0.650242	0.504557	0.519592	0.486173	0.689746	0.64158	0.605655	0.349048	0.391592	0.396729	0.57326	0.658083	0.527146	0.428443	0.475768	0.280404	0.54127	0.467226	0.20008	0.491034	0.546119	0.486413	0.5545	0.455456	0.307766	0.394048	0.449501	0.734776		0.493079	0.506659	FALSE	FALSE	1050		bin21	0.536379	0.377902	0.527778	0.552636	0.625522	0.530994	0.449264	0.239805	0.59095	0.517676	0.564302	0.671109	0.464453
bin22	0.657558	0.498531	0.56229	0.47343	0.697681	0.697436	0.595663	0.349232	0.397765	0.408381	0.581998	0.54316	0.529252	0.422078	0.437852	0.30425	0.526381	0.462434	0.161746	0.420137	0.550768	0.501532	0.573228	0.436642	0.319096	0.434374	0.428302	0.756799		0.490286	0.99569	FALSE	FALSE	1100		bin22	0.533638	0.361538	0.522458	0.55814	0.579203	0.483804	0.431774	0.232076	0.545753	0.5686	0.54198	0.589027	0.481108
bin23	0.679831	0.484675	0.551515	0.490476	0.671233	0.725	0.603774	0.329664	0.387597	0.415385	0.584188	0.478261	0.527234	0.428571	0.405556	0.287095	0.485576	0.481481	0.153439	0.430047	0.570315	0.468283	0.569231	0.466103	0.324135	0.428645	0.421736	0.741497		0.485376	0.888411	FALSE	FALSE	1150		bin23	0.560067	0.398148	0.501822	0.548294	0.570315	0.450172	0.438095	0.219512	0.567164	0.552941	0.533876	0.55787	0.476591
bin24	0.691873	0.486783	0.545455	0.485714	0.657534	0.733333	0.603774	0.363714	0.399225	0.409091	0.554167	0.46156	0.52459	0.442816	0.388889	0.3	0.504762	0.484375	0.153439	0.41791	0.569767	0.48198	0.553846	0.454902	0.340561	0.406393	0.417407	0.693878		0.483133	0.97829	FALSE	FALSE	1200		bin24	0.529129	0.39447	0.487952	0.545455	0.52549	0.434883	0.438095	0.233614	0.58209	0.545098	0.564444	0.555556	0.476852
bin25	0.68133	0.474022	0.533333	0.471429	0.652968	0.699187	0.603774	0.376344	0.391473	0.424242	0.542094	0.459351	0.546007	0.444444	0.355556	0.3	0.526363	0.510417	0.142857	0.41791	0.536001	0.48408	0.558353	0.45098	0.344086	0.39726	0.409479	0.666667		0.478572	0.924121	FALSE	FALSE	1250		bin25	0.540606	0.405405	0.496031	0.545455	0.517647	0.45269	0.434921	0.259259	0.584879	0.545098	0.546667	0.55144	0.462963
bin26	0.709677	0.491453	0.487771	0.428571	0.616438	0.666667	0.584906	0.387097	0.395349	0.414141	0.541667	0.449275	0.481051	0.421598	0.25	0.3	0.529128	0.477234	0.142857	0.38806	0.514012	0.472726	0.556099	0.45098	0.370968	0.39726	0.397436	0.666667		0.463896	0.954915	FALSE	FALSE	1300		bin26	0.564759	0.405405	0.450366	0.537879	0.505882	0.412932	0.361905	0.26034	0.566278	0.468992	0.549189	0.541002	0.453704
bin27	0.662789	0.50211	0.394896	0.414286	0.63785	0.716316	0.54717	0.421823	0.386027	0.306061	0.508281	0.434783	0.430108	0.460249	0.128343	0.295238	0.552381	0.454998	0.132275	0.310433	0.535714	0.490994	0.546394	0.353175	0.365591	0.396309	0.383616	0.746882		0.446967	0.444395	FALSE	FALSE	1350		bin27	0.624459	0.400901	0.402009	0.541667	0.432057	0.389088	0.219048	0.28828	0.494792	0.368217	0.513699	0.536585	0.43379
bin28	0.517051	0.517206	0.449444	0.438095	0.684685	0.738095	0.603774	0.491533	0.363585	0.282051	0.451477	0.425121	0.383571	0.532834	0.106215	0.230711	0.661905	0.45098	0.359788	0.269608	0.519985	0.592593	0.550732	0.27381	0.349462	0.365741	0.354701	0.805556		0.456082	0.160327	FALSE	FALSE	1400		bin28	0.627706	0.432432	0.333287	0.522727	0.344961	0.359481	0.130922	0.295682	0.473958	0.337209	0.550419	0.47561	0.361111
bin29	0.464299	0.527861	0.493595	0.42381	0.684932	0.713178	0.572327	0.46949	0.349206	0.276923	0.417722	0.309179	0.349727	0.51938	0.1	0.247619	0.745098	0.472178	0.497354	0.323383	0.473549	0.601852	0.60705	0.253968	0.333333	0.365741	0.288711	0.820813		0.453653	0.0860258	FALSE	FALSE	1450		bin29	0.628875	0.467846	0.315613	0.537879	0.278431	0.339145	0.112522	0.324424	0.442708	0.341176	0.559678	0.317073	0.319444
bin30	0.407633	0.517094	0.57762	0.471429	0.71087	0.712233	0.69272	0.520394	0.351774	0.342345	0.435074	0.367647	0.385499	0.51832	0.161111	0.279132	0.79602	0.499743	0.625	0.353234	0.518524	0.60732	0.666876	0.265873	0.349462	0.50463	0.324675	0.791243		0.491196	0.0146072	TURE	FALSE	1500		bin30	0.626181	0.495495	0.317759	0.575758	0.221642	0.32873	0.103807	0.328681	0.440465	0.339806	0.52968	0.345528	0.314815
bin31	0.421375	0.508439	0.585401	0.57619	0.673249	0.654835	0.767539	0.634486	0.396078	0.481481	0.487605	0.529558	0.429379	0.537316	0.415348	0.420323	0.846154	0.546784	0.689484	0.537313	0.557966	0.608108	0.698789	0.400794	0.413097	0.57277	0.329004	0.752958		0.552565	0.000260074	TURE	TURE	1550		bin31	0.578059	0.49537	0.250185	0.507576	0.218803	0.369565	0.129733	0.341408	0.4375	0.423646	0.488769	0.44856	0.317749
bin32	0.424892	0.533337	0.605723	0.519048	0.651066	0.626011	0.849399	0.740566	0.529001	0.645503	0.57384	0.568627	0.45187	0.596387	0.661111	0.589122	0.880188	0.573176	0.791667	0.655107	0.586555	0.594595	0.644554	0.53012	0.47296	0.591373	0.327523	0.721372		0.60481	1.24074e-05	TURE	TURE	1600		bin32	0.570223	0.50463	0.290898	0.440559	0.170234	0.409814	0.102286	0.372162	0.407372	0.568787	0.432432	0.473251	0.339638
bin33	0.464833	0.576132	0.620833	0.567357	0.629781	0.536036	0.874622	0.762885	0.648587	0.717522	0.602575	0.562792	0.587571	0.668025	0.822222	0.746339	0.778901	0.611393	0.868552	0.732733	0.651525	0.540787	0.642705	0.697718	0.528736	0.624906	0.371696	0.702991		0.647884	1.30752e-07	TURE	TURE	1650		bin33	0.504274	0.465753	0.377807	0.456251	0.219315	0.373925	0.0668227	0.403286	0.277375	0.583404	0.400901	0.477366	0.278744
bin34	0.505838	0.584295	0.696076	0.574879	0.492318	0.499711	0.915995	0.700099	0.788191	0.769732	0.591251	0.570707	0.752874	0.699159	0.877119	0.819089	0.707861	0.619407	0.827653	0.757539	0.728919	0.515982	0.588889	0.781222	0.56236	0.616291	0.491	0.77298		0.671694	1.33014e-08	TURE	TURE	1700		bin34	0.434628	0.43379	0.466453	0.429502	0.232405	0.358618	0.0719678	0.442187	0.318332	0.53913	0.389967	0.481481	0.299721
bin35	0.59574	0.665168	0.676329	0.608198	0.505741	0.459596	1	0.746729	0.813742	0.796668	0.558327	0.59596	0.758415	0.771327	0.897623	0.808453	0.601389	0.611895	0.74849	0.73801	0.740862	0.518327	0.571717	0.834998	0.546471	0.619044	0.596213	0.757602		0.68368	5.15901e-08	TURE	TURE	1750		bin35	0.422759	0.465753	0.447271	0.392776	0.281278	0.389755	0.0554714	0.514351	0.373111	0.476998	0.414654	0.510288	0.405423
bin36	0.583213	0.626532	0.560185	0.641291	0.583437	0.461214	1	0.706359	0.802133	0.810504	0.60098	0.60101	0.694312	0.77	0.897721	0.774227	0.560468	0.683324	0.642893	0.726786	0.705774	0.445946	0.542414	0.862396	0.556381	0.640969	0.663743	0.738889		0.674396	2.85323e-07	TURE	TURE	1800		bin36	0.44153	0.514706	0.415975	0.320206	0.271398	0.420757	0.0151515	0.474567	0.440451	0.470756	0.398075	0.5125	0.494796
bin37	0.620879	0.594153	0.48547	0.668667	0.573738	0.450549	1	0.710765	0.811616	0.777485	0.62026	0.633207	0.68373	0.793452	0.930603	0.7838	0.531396	0.707729	0.559524	0.754873	0.584058	0.427553	0.455637	0.871874	0.595289	0.649457	0.685975	0.775758		0.669196	5.38524e-07	TURE	TURE	1850		bin37	0.412386	0.533059	0.488836	0.276263	0.292762	0.372524	0	0.43564	0.448204	0.489755	0.366949	0.440919	0.565742
bin38	0.634997	0.570015	0.558081	0.659083	0.632076	0.478865	1	0.731241	0.785516	0.685531	0.726113	0.638777	0.606046	0.833485	0.95584	0.713043	0.392593	0.661414	0.551527	0.69099	0.322222	0.493157	0.569444	0.896049	0.623464	0.595302	0.734912	0.952381		0.667577	9.56665e-07	TURE	TURE	1900		bin38	0.388405	0.472533	0.435185	0.278113	0.245833	0.280906	0	0.534413	0.390502	0.384383	0.37723	0.38122	0.60425
bin39	0.625926	0.628903	0.644444	0.653539	0.624288	0.485507	1	0.852288	0.769831	0.62907	0.802193	0.618815	0.6337	0.906546	0.945153	0.734612	0.333333	0.691892	0.51549	0.659588	0.566667	0.556218	0.933333	0.925981	0.504094	0.468082	0.770979	1		0.695731	1.27493e-07	TURE	TURE	1950		bin39	0.387255	0.49242	0.555556	0.316558	0.203907	0.315434	0	0.411681	0.365278	0.343358	0.403014	0.368826	0.60508
bin40	0.750794	0.609969	0.396825	0.605502	0.52381	0.446255	1	0.744444	0.728997	0.435633	0.876065	0.534363	0.682197	0.904056	0.931724	0.825612	0.666667	0.695446	0.440117	0.685543	0.555556	0.558031	1	0.908759	0.405556	0.466468	0.771603	1		0.683928	4.16727e-07	TURE	TURE	2000		bin40	0.281579	0.4862	0.5	0.413095	0.190236	0.313988	0	0.337121	0.322222	0.276094	0.298685	0.376329	0.543586
bin41	0.933333	0.598897	0.377778	0.499165	0.555556	0.526263	1	0.528042	0.714372	0.361823	0.8915	0.516879	0.616911	0.947852	0.92369	0.638889	1	0.505662	0.497946	0.662766	1	0.585159	1	0.872879	0.224074	0.514652	0.768105	1		0.687935	1.45478e-05	TURE	TURE	2050		bin41	0.184314	0.329749	0.5	0.441481	0.261111	0.407759	NaN	0.228431	0.23194	0.290476	0.269381	0.395521	0.46967
bin42	0.822222	0.580713	0.388889	0.442593	1	0.648485	NaN	0.333333	0.771569	0.5	0.802381	0.530146	0.660334	0.927778	0.940689	0.555556	1	0.309783	0.615534	0.766393	1	0.607585	1	0.836597	0.444444	0.542929	0.7696	1		0.696206	3.81952e-06	TURE	TURE	2100		bin42	0.0888889	0.407628	0.444444	0.35042	0	0.429697	NaN	0.321368	0.285714	0.190476	0.308913	0.424765	0.459259
bin43	0.666667	0.512821	0.388889	0.388889	1	0.641667	NaN	0.333333	0.822222	0.5	0.75	0.43462	0.712976	1	0.925926	0.516667	1	0.270833	0.613528	0.801753	1	0.603579	1	0.817593	0.5	0.439815	0.801886	1		0.683099	1.77529e-06	TURE	TURE	2150		bin43	0.180952	0.494048	0	0.360897	0	0.288889	NaN	0.16336	0.252814	0.266667	0.310897	0.4156	0.294872
bin44	0.5	0.439815	0.833333	0.777778	1	0.571429	NaN	0.355556	0.769048	0.722222	0.166667	0.446139	0.830387	1	0.887963	0.666667	1	0.342491	0.605922	0.675758	NaN	0.600062	NaN	0.766667	0.333333	0.333333	0.805847	1		0.657217	3.47413e-06	TURE	TURE	2200		bin44	0.216667	0.488889	0	0.409524	0	0.25812	NaN	0.288889	0.150794	0.611111	0.277778	0.286195	0.214286
bin45	0.411111	0.666667	1	1	1	0.666667	NaN	0.583333	0.683333	NaN	0	0.606423	0.791667	0.888889	0.904762	1	NaN	0.391667	0.612121	0.710317	NaN	0.550897	NaN	0.75	0.666667	0.555556	0.909559	NaN		0.697711	2.27088e-06	TURE	TURE	2250		bin45	0.205556	0.484848	0	0.433333	0	0.259259	NaN	0.416667	0.205556	1	0.4	0.181818	0
bin46	0	1	0.333333	NaN	NaN	0.644444	NaN	0.75	0.333333	NaN	NaN	0.801865	0.866667	0.666667	1	NaN	NaN	0.3	0.72619	0.666667	NaN	0.520513	NaN	0.916667	0.833333	0.85	0.92619	NaN		0.674215	0.000347329	TURE	TURE	2300		bin46	0.444444	0.318182	0	0.388889	0	0.377778	NaN	0.833333	0	1	0.388889	0.162751	0
bin47	0	NaN	0	NaN	NaN	0.611111	NaN	0.666667	0	NaN	NaN	0.728283	0.916667	0.444444	1	NaN	NaN	0.0833333	0.822222	0.566667	NaN	0.472222	NaN	1	1	0.75	0.938889	NaN		0.588265	0.186879	FALSE	FALSE	2350		bin47	0.5	0.166667	1	0.333333	NaN	0.4	NaN	1	0	1	0.666667	0.0512821	0
bin48	0	NaN	NaN	NaN	NaN	0.5	NaN	1	0	NaN	NaN	0.589286	0.833333	0	1	NaN	NaN	0	1	0.5	NaN	0.457143	NaN	1	NaN	0.722222	0.867725	NaN		0.564647	0.0522221	FALSE	FALSE	2400		bin48	0.333333	1	NaN	0	NaN	0.355556	NaN	NaN	0	1	NaN	0	0
bin49	0	NaN	0	NaN	NaN	0	NaN	1	0.333333	NaN	NaN	0.411111	1	NaN	NaN	NaN	NaN	1	1	0.666667	NaN	0.466667	NaN	1	NaN	0.833333	0.877778	NaN		0.613492	0.0589768	FALSE	FALSE	2450		bin49	0	1	NaN	0	NaN	0.666667	NaN	NaN	NaN	0.5	NaN	0	NaN
bin50	0	NaN	0	NaN	NaN	NaN	NaN	1	NaN	NaN	NaN	0.416667	1	NaN	NaN	NaN	NaN	NaN	NaN	1	NaN	0.555556	NaN	1	NaN	1	1	NaN		0.697222	0.189311	FALSE	FALSE	2500		bin50	NaN	1	NaN	NaN	NaN	1	NaN	NaN	NaN	NaN	NaN	0	NaN
AVE																																				AVE
DL DOT																																				DL DOT
CUED	S13	S14	S15	S16	S17	S18	S19	S20	S21	S22	S23	S24	S25	S26	S27	S28	S29	S31	S32	S33	S34	S35	S36	S37	S38	S39	S40	S41		AVE	T-test			time (ms)		UNCUED	S13	S14	S15	S16	S17	S18	S19	S20	S21	S22	S23	S24	S25
bin1	0.551282	0.571429	0.490196	0.438596	0.473684	0.25	0.529412	0.785714	0.434783	0.473684	0.293333	0.533333	0.538462	0.481481	0.204545	0.388889	0.375	0.518519	0.631579	0.375	0.409091	0.521739	0.736842	0.7	0.588235	0.402778	0.5	0.533333		0.490391	0.723493	FALSE	FALSE	50		bin1	0.395833	0.453159	0.458333	0.5	0.428571	0.424242	0.478261	0.289855	0.568627	0.52381	0.580952	0.444444	0.5
bin2	0.5	0.571429	0.509804	0.421053	0.421053	0.25	0.529412	0.785714	0.42029	0.473684	0.28	0.5	0.538462	0.481481	0.181818	0.388889	0.416667	0.5	0.631579	0.375	0.460317	0.550725	0.736842	0.649123	0.588235	0.416667	0.491228	0.533333		0.485814	0.57524	FALSE	FALSE	100		bin2	0.437564	0.461874	0.529412	0.5	0.428571	0.464646	0.478261	0.26087	0.588235	0.47619	0.622222	0.444444	0.5
bin3	0.525641	0.603175	0.529412	0.421053	0.421053	0.25	0.529412	0.785714	0.434783	0.473684	0.297778	0.466667	0.538462	0.481481	0.227273	0.444444	0.354167	0.518519	0.631579	0.375	0.52381	0.536232	0.736842	0.631579	0.588235	0.416667	0.445419	0.533333		0.49005	0.547139	FALSE	FALSE	150		bin3	0.417957	0.444444	0.498911	0.533333	0.380952	0.484848	0.478261	0.304348	0.612745	0.492063	0.666667	0.42885	0.515152
bin4	0.538462	0.52381	0.551471	0.368421	0.421053	0.25	0.529412	0.785714	0.405797	0.491228	0.333333	0.466667	0.538462	0.5	0.234848	0.444444	0.375	0.555556	0.631579	0.375	0.507937	0.594203	0.736842	0.631579	0.588235	0.416667	0.362963	0.533333		0.489001	0.480382	FALSE	FALSE	200		bin4	0.459559	0.444444	0.546841	0.583333	0.47619	0.454545	0.478261	0.304348	0.625	0.444444	0.666667	0.421053	0.492754
bin5	0.538462	0.428571	0.686275	0.315789	0.421053	0.25	0.529412	0.785714	0.42029	0.526316	0.383333	0.55	0.538462	0.518519	0.5	0.444444	0.416667	0.555556	0.631579	0.375	0.515152	0.57971	0.736842	0.614035	0.603486	0.430556	0.35614	0.5		0.505406	0.755556	FALSE	FALSE	250		bin5	0.444444	0.444444	0.529412	0.6	0.539683	0.40404	0.478261	0.275362	0.5625	0.460317	0.666667	0.421053	0.478261
bin6	0.512821	0.444444	0.803922	0.263158	0.438596	0.25	0.529412	0.738095	0.434783	0.491228	0.4	0.7	0.538462	0.518519	0.527778	0.481481	0.4	0.666667	0.631579	0.4375	0.545455	0.565217	0.736842	0.631579	0.611111	0.486111	0.35614	0.690476		0.529692	0.992695	FALSE	FALSE	300		bin6	0.461874	0.444444	0.528322	0.6	0.619048	0.434343	0.478261	0.275362	0.5625	0.507937	0.666667	0.473684	0.478261
bin7	0.525641	0.444444	0.843137	0.298246	0.719298	0.25	0.529412	0.690476	0.434783	0.526316	0.426667	0.816667	0.538462	0.555556	0.717172	0.518519	0.4	0.748148	0.684211	0.5625	0.546898	0.507246	0.736842	0.736842	0.611111	0.486111	0.35	0.833333		0.572787	0.958085	FALSE	FALSE	350		bin7	0.480392	0.444444	0.5625	0.6	0.746032	0.454545	0.492754	0.376812	0.618873	0.555556	0.688889	0.614035	0.485507
bin8	0.589744	0.428571	0.938725	0.333333	0.982456	0.5	0.568627	0.642857	0.434783	0.54386	0.44	0.966667	0.538462	0.666667	0.828283	0.555556	0.4	0.905556	0.736842	0.6875	0.560606	0.521739	0.741228	0.789474	0.611111	0.5	0.4	0.930159		0.633672	0.821461	FALSE	FALSE	400		bin8	0.554638	0.444444	0.75	0.65	0.825397	0.464646	0.536232	0.42029	0.745098	0.571429	0.666667	0.754386	0.5
bin9	0.626984	0.428571	0.980392	0.403509	1	0.5	0.647059	0.714286	0.507246	0.526316	0.44	1	0.538462	0.716049	0.833333	0.555556	0.4	0.928571	0.759259	0.650794	0.52381	0.550725	0.766667	0.789474	0.666667	0.486111	0.4	0.933333		0.652613	0.607608	FALSE	FALSE	450		bin9	0.53254	0.444444	0.9375	0.65	0.904762	0.454545	0.565217	0.608696	0.745098	0.571429	0.666667	0.842105	0.5
bin10	0.645503	0.463492	1	0.455166	1	0.638889	0.653186	0.796537	0.580515	0.517544	0.453291	1	0.567308	0.731922	0.794444	0.607407	0.340741	0.845543	0.87037	0.638462	0.543693	0.547619	0.798653	0.829346	0.724868	0.506039	0.384795	0.912302		0.67313	0.654931	FALSE	FALSE	500		bin10	0.529683	0.539352	0.913889	0.664103	0.914648	0.462451	0.532367	0.657005	0.751961	0.693679	0.569444	0.833408	0.487179
bin11	0.764347	0.340476	1	0.454191	1	0.75	0.555964	0.728632	0.47412	0.542385	0.504697	1	0.512821	0.730769	0.793651	0.703241	0.451515	0.822222	0.849673	0.668651	0.52091	0.538406	0.807977	0.682972	0.789418	0.583333	0.433333	0.953968		0.67706	0.399796	FALSE	FALSE	550		bin11	0.579537	0.543137	0.953526	0.642593	0.88955	0.482129	0.629483	0.646179	0.759804	0.76792	0.749288	0.850146	0.508772
bin12	0.716728	0.460317	0.980392	0.473684	0.964912	0.75	0.647059	0.769231	0.565217	0.526316	0.48	1	0.538462	0.641026	0.833333	0.62963	0.4	0.75	0.888889	0.666667	0.460317	0.565217	0.8	0.649123	0.777778	0.583333	0.4	0.866667		0.670868	0.43992	FALSE	FALSE	600		bin12	0.578947	0.5	0.936111	0.65	0.904762	0.525253	0.550725	0.652174	0.745098	0.8	0.666667	0.842105	0.484848
bin13	0.6	0.47619	0.941176	0.526316	0.947368	0.75	0.647059	0.692308	0.594203	0.526316	0.48	1	0.538462	0.599715	0.833333	0.555556	0.4	0.666667	0.88671	0.666667	0.442857	0.521739	0.789474	0.491228	0.722222	0.583333	0.4	0.733333		0.643294	0.157981	FALSE	FALSE	650		bin13	0.559649	0.518519	0.891667	0.666667	0.904762	0.525253	0.492754	0.626482	0.705882	0.816667	0.666667	0.842105	0.454545
bin14	0.6	0.47619	0.89951	0.526316	0.947368	0.75	0.588235	0.717949	0.565217	0.526316	0.48	1	0.538462	0.567901	0.805556	0.481481	0.4	0.5	0.9375	0.698413	0.442063	0.521739	0.789474	0.491228	0.703704	0.597222	0.4	0.688889		0.630026	0.158503	FALSE	FALSE	700		bin14	0.563353	0.5	0.830556	0.65	0.920635	0.54072	0.478261	0.575758	0.705882	0.85	0.666667	0.947368	0.454545
bin15	0.6	0.5	0.859069	0.526316	0.947368	0.583333	0.568627	0.666667	0.550725	0.526316	0.506667	0.966667	0.538462	0.518519	0.777778	0.481481	0.4	0.5	0.875	0.659722	0.45873	0.507246	0.789474	0.491228	0.666667	0.569444	0.4	0.666667		0.610792	0.115249	FALSE	FALSE	750		bin15	0.54386	0.470588	0.75	0.566667	0.952381	0.552083	0.478261	0.545455	0.705882	0.807018	0.666667	0.947368	0.454545
bin16	0.555556	0.5	0.759722	0.526316	0.912281	0.5	0.568627	0.615385	0.492754	0.508772	0.52	0.983333	0.538462	0.518519	0.833333	0.296296	0.4	0.5	0.757353	0.4375	0.466667	0.550725	0.8	0.54386	0.666667	0.536232	0.4	0.666667		0.584108	0.126865	FALSE	FALSE	800		bin16	0.526316	0.470588	0.604167	0.55	0.936508	0.5625	0.478261	0.469697	0.647059	0.754386	0.666667	0.945419	0.454545
bin17	0.533333	0.516667	0.577778	0.526316	0.807018	0.416667	0.529412	0.615385	0.478261	0.526316	0.48	1	0.547741	0.474834	0.805556	0.240741	0.4	0.474359	0.568627	0.395833	0.492063	0.57971	0.75	0.54386	0.666667	0.478261	0.4	0.666667		0.553288	0.155674	FALSE	FALSE	850		bin17	0.534211	0.470588	0.5625	0.55	0.825397	0.552083	0.478261	0.378788	0.588235	0.631579	0.666667	0.907407	0.454545
bin18	0.533333	0.499123	0.488889	0.526316	0.736842	0.25	0.529412	0.564103	0.478261	0.491228	0.466667	1	0.5	0.474359	0.833333	0.277778	0.4	0.428571	0.431373	0.383333	0.607937	0.652174	0.736355	0.473684	0.648148	0.447958	0.4	0.666667		0.533066	0.208135	FALSE	FALSE	900		bin18	0.553606	0.470588	0.568627	0.55	0.761905	0.548387	0.478261	0.363636	0.588235	0.526316	0.714286	0.888889	0.454545
bin19	0.466667	0.473684	0.456944	0.526316	0.684211	0.25	0.519608	0.538462	0.5	0.45614	0.48	0.964912	0.5	0.525641	0.75	0.277778	0.444444	0.428571	0.333333	0.391667	0.603175	0.695652	0.709552	0.421053	0.62963	0.454545	0.4	0.644444		0.518801	0.303345	FALSE	FALSE	950		bin19	0.585965	0.490196	0.588235	0.55	0.714286	0.505376	0.478261	0.363636	0.529412	0.491228	0.642857	0.833333	0.454545
bin20	0.511111	0.526316	0.479167	0.553606	0.649123	0.25	0.5	0.487179	0.442029	0.473684	0.493333	0.912281	0.53663	0.5	0.75	0.277778	0.466667	0.428571	0.27451	0.333333	0.603175	0.681159	0.727096	0.438596	0.574074	0.507937	0.45	0.622222		0.516056	0.511398	FALSE	FALSE	1000		bin20	0.555556	0.529412	0.579657	0.576316	0.666667	0.44552	0.478261	0.333333	0.470588	0.482456	0.642857	0.814815	0.454545
bin21	0.52381	0.529412	0.410791	0.609804	0.646242	0.25	0.5	0.418998	0.389694	0.467699	0.528485	0.735065	0.564103	0.434038	0.655556	0.250712	0.466667	0.433923	0.21091	0.396825	0.53254	0.61726	0.705931	0.49226	0.546296	0.506085	0.450705	0.665446		0.49783	0.488711	FALSE	FALSE	1050		bin21	0.497743	0.490196	0.567873	0.604971	0.642593	0.417204	0.443182	0.211713	0.485068	0.444444	0.586081	0.722222	0.469697
bin22	0.570707	0.452381	0.479167	0.578947	0.597953	0.25	0.501709	0.448218	0.418764	0.461623	0.505254	0.492929	0.594444	0.42094	0.484848	0.298942	0.464031	0.428571	0.15957	0.349242	0.503704	0.640598	0.77037	0.403953	0.471342	0.552381	0.437879	0.662121		0.478593	0.373669	FALSE	FALSE	1100		bin22	0.5	0.457576	0.642157	0.6	0.671242	0.406748	0.492754	0.29141	0.441176	0.482456	0.549242	0.734127	0.488562
bin23	0.604762	0.453044	0.520833	0.578947	0.561404	0.25	0.5	0.47619	0.391304	0.473684	0.527222	0.421053	0.615385	0.423077	0.5	0.296296	0.466667	0.428571	0.176471	0.375	0.634921	0.61726	0.75	0.45	0.518519	0.52381	0.433333	0.666667		0.486944	0.544801	FALSE	FALSE	1150		bin23	0.578704	0.529412	0.568627	0.6	0.650794	0.322581	0.478261	0.272727	0.431373	0.473684	0.56044	0.666667	0.436364
bin24	0.571429	0.421053	0.5625	0.526316	0.526316	0.25	0.5	0.5	0.405797	0.473684	0.533333	0.421053	0.615385	0.423077	0.5	0.333333	0.466667	0.428571	0.176471	0.375	0.619048	0.606217	0.7	0.416667	0.555556	0.460317	0.416667	0.622222		0.47881	0.542058	FALSE	FALSE	1200		bin24	0.54386	0.509804	0.588235	0.6	0.52381	0.301075	0.478261	0.272727	0.490196	0.438596	0.595238	0.666667	0.424242
bin25	0.571429	0.400585	0.5625	0.491228	0.526316	0.25	0.5	0.5	0.434783	0.526316	0.603333	0.42885	0.586081	0.423077	0.444444	0.333333	0.466667	0.428571	0.176471	0.375	0.590909	0.575758	0.7	0.4	0.5	0.428571	0.383333	0.666667		0.474079	0.395677	FALSE	FALSE	1250		bin25	0.578947	0.5	0.574246	0.6	0.52381	0.333333	0.478261	0.272727	0.519608	0.421053	0.642857	0.666667	0.409091
bin26	0.650794	0.385965	0.490196	0.403509	0.526316	0.25	0.479167	0.5	0.434783	0.491228	0.611111	0.425926	0.52381	0.410256	0.277778	0.333333	0.466667	0.47619	0.176471	0.375	0.569986	0.469697	0.7	0.383333	0.555556	0.428571	0.366667	0.666667		0.458178	0.58124	FALSE	FALSE	1300		bin26	0.666667	0.5	0.546841	0.633333	0.52381	0.21875	0.405797	0.287879	0.477778	0.315789	0.619048	0.648148	0.393939
bin27	0.6	0.421053	0.39951	0.368421	0.508772	0.25	0.458333	0.5	0.391304	0.400585	0.597222	0.388889	0.595238	0.461538	0.171717	0.314815	0.511111	0.466667	0.176471	0.333333	0.590909	0.454545	0.666667	0.383333	0.555556	0.442857	0.35	0.688889		0.444562	0.505023	FALSE	FALSE	1350		bin27	0.702144	0.481481	0.561404	0.566667	0.412698	0.1875	0.246377	0.31241	0.377778	0.245614	0.525641	0.611111	0.393939
bin28	0.444444	0.470588	0.509804	0.403509	0.54386	0.25	0.5625	0.547619	0.347826	0.388889	0.541667	0.37037	0.558608	0.552821	0.171717	0.314815	0.777778	0.466667	0.372549	0.25	0.545455	0.636364	0.698257	0.383333	0.555556	0.45	0.283333	0.911111		0.475337	0.0964126	FALSE	FALSE	1400		bin28	0.683333	0.518519	0.459259	0.55	0.301587	0.197917	0.130435	0.333333	0.466667	0.210526	0.512821	0.537037	0.318182
bin29	0.5125	0.508715	0.5	0.368421	0.596491	0.416667	0.5	0.5	0.358366	0.388889	0.541667	0.148148	0.461538	0.52	0.166667	0.351852	0.857143	0.512698	0.54902	0.270833	0.507937	0.666667	0.703704	0.35	0.555556	0.45	0.166667	0.863492		0.474773	0.0298897	TURE	FALSE	1450		bin29	0.645238	0.574074	0.516667	0.55	0.333333	0.166667	0.132411	0.344444	0.466667	0.210526	0.525641	0.314815	0.227273
bin30	0.4375	0.518519	0.714286	0.368421	0.684211	0.666667	0.520833	0.595238	0.353096	0.470588	0.513889	0.203704	0.461538	0.5	0.166667	0.388889	0.846154	0.56044	0.686275	0.270833	0.52381	0.627141	0.857843	0.383333	0.537037	0.483333	0.233333	0.849817		0.515121	0.0034794	TURE	FALSE	1500		bin30	0.65	0.518519	0.530303	0.516667	0.269841	0.129032	0.0606061	0.35254	0.488889	0.214425	0.538462	0.277778	0.227273
bin31	0.4	0.5	0.725758	0.649123	0.684211	0.722222	0.576389	0.642857	0.42029	0.470588	0.506667	0.490196	0.538462	0.507246	0.323232	0.45098	0.916667	0.454545	0.764706	0.458333	0.603175	0.608696	0.823529	0.516667	0.538126	0.491228	0.25	0.837607		0.566839	1.85642e-05	TURE	TURE	1550		bin31	0.563492	0.444444	0.343434	0.366667	0.142857	0.150538	0.046176	0.327206	0.5	0.314815	0.466667	0.254902	0.227273
bin32	0.395833	0.524561	0.725926	0.561404	0.666667	0.666667	0.711111	0.690476	0.57971	0.627451	0.586667	0.588235	0.474359	0.59697	0.555556	0.54902	0.944444	0.545455	0.843137	0.5625	0.596491	0.536232	0.732026	0.583333	0.54902	0.54386	0.241228	0.887566		0.609497	1.47247e-06	TURE	TURE	1600		bin32	0.471014	0.425926	0.259259	0.389474	0.129365	0.256158	0.0500835	0.358364	0.354167	0.561275	0.488889	0.411765	0.272727
bin33	0.422222	0.483333	0.857143	0.578947	0.684211	0.666667	0.789744	0.733333	0.714286	0.647059	0.662222	0.588235	0.487179	0.749582	0.805556	0.749346	0.775253	0.616162	0.921569	0.608333	0.618228	0.449275	0.6	0.766667	0.588235	0.596491	0.308967	0.811111		0.652834	5.08934e-08	TURE	TURE	1650		bin33	0.434783	0.37037	0.25	0.444444	0.293709	0.351971	0.057985	0.405983	0.166667	0.652778	0.47619	0.411765	0.202742
bin34	0.606349	0.583333	0.833333	0.614035	0.608115	0.666667	0.833333	0.691087	0.783333	0.639706	0.583333	0.588235	0.666667	0.780093	0.828283	0.726984	0.821429	0.636364	0.8125	0.666667	0.573382	0.463768	0.485714	0.833333	0.630952	0.544834	0.42193	0.733333		0.666325	4.90126e-09	TURE	TURE	1700		bin34	0.261183	0.351852	0.277778	0.444444	0.333333	0.462802	0.0208333	0.429293	0.2	0.621795	0.435897	0.411765	0.303843
bin35	0.523504	0.633542	0.6	0.615741	0.5625	0.666667	1	0.666667	0.833333	0.6875	0.557367	0.686275	0.83547	0.756127	0.856061	0.666667	0.68254	0.636364	0.791667	0.644444	0.533333	0.478261	0.403263	0.836257	0.571429	0.536508	0.616667	0.766667		0.665886	8.13429e-07	TURE	TURE	1750		bin35	0.327485	0.407407	0.15873	0.388889	0.375458	0.540248	0	0.481481	0.233333	0.558081	0.5	0.568627	0.436647
bin36	0.416667	0.574074	0.305556	0.645833	0.590152	0.777778	1	0.785185	0.902914	0.680556	0.636364	0.705882	0.694444	0.729167	0.916667	0.674242	0.588889	0.678788	0.75	0.660317	0.566667	0.347826	0.379545	0.843954	0.568376	0.551587	0.633333	0.722222		0.654535	1.0436e-05	TURE	TURE	1800		bin36	0.315476	0.520833	0.0555556	0.363095	0.438552	0.632479	0	0.416667	0.234499	0.563636	0.484848	0.54902	0.558824
bin37	0.421212	0.488889	0.333333	0.687897	0.559524	0.666667	1	0.83664	0.928327	0.675214	0.629365	0.802696	0.616162	0.773016	0.911616	0.759259	0.777778	0.6	0.666667	0.826007	0.933333	0.338603	0.285714	0.820238	0.583333	0.583333	0.763158	0.833333		0.68219	4.35752e-05	TURE	TURE	1850		bin37	0.296037	0.529412	0	0.431624	0.448148	0.594017	0	0.309524	0.157407	0.601852	0.448148	0.520833	0.646242
bin38	0.396825	0.39011	0.555556	0.571429	0.687302	0.666667	1	0.822222	0.913248	0.711111	0.7154	0.895833	0.644444	0.800505	1	0.719577	1	0.448148	0.638889	0.817172	1	0.393939	0.5	0.805861	0.733333	0.607407	0.876218	1		0.7254	2.20109e-07	TURE	TURE	1900		bin38	0.248316	0.509804	0	0.232804	0.416667	0.377778	0	0.666667	0.130952	0.357143	0.407407	0.485913	0.762759
bin39	0.233333	0.527778	0.888889	0.555556	0.85	0.666667	1	1	0.871429	0.517857	0.810458	0.750427	0.638889	0.939394	1	0.672222	1	0.732143	0.650794	0.822222	1	0.507215	1	0.791246	0.68254	0.518519	0.920343	1		0.769569	2.05142e-07	TURE	TURE	1950		bin39	0.25	0.560606	0	0.31746	0	0.375	NaN	0.533333	0.222222	0.304762	0.5	0.452381	0.782051
bin40	0.455556	0.454545	1	0.561448	1	0.555556	NaN	0.833333	0.888889	0.277778	0.900253	0.564103	0.654762	1	1	0.694444	1	0.857143	0.488889	0.675926	1	0.557937	NaN	0.678571	0.533333	0.64881	0.931303	1		0.738945	6.38116e-06	TURE	TURE	2000		bin40	0.311905	0.578788	0	0.383333	0	0.553571	NaN	0.5	0.25	0.133333	0.452381	0.508658	0.775758
bin41	0.888889	0.46633	1	0.579365	NaN	0.5	NaN	0.166667	1	0.277778	0.838095	0.538462	0.769444	1	1	0.5	1	0.666667	0.5	0.696429	NaN	0.563353	NaN	0.5	0	0.666667	0.923077	1		0.668384	0.0024413	TURE	FALSE	2050		bin41	0.4	0.333333	0	0.25	0	0.753968	NaN	0.611111	0	0	0.388889	0.466667	0.766667
bin42	0.5	0.560185	1	0.777778	NaN	0.833333	NaN	0	1	1	0.694444	0.444444	0.566667	1	1	0.5	1	0.557143	0.581391	0.757937	NaN	0.577342	NaN	0.444444	0	0.588889	0.916278	NaN		0.665229	0.00253684	TURE	FALSE	2100		bin42	0.166667	0.381481	0	0.25	0	0.6	NaN	0.666667	0	0	0.355556	0.428571	0.916667
bin43	1	0.833333	NaN	1	NaN	0.666667	NaN	0	1	1	1	0.263889	0.333333	1	1	0.666667	NaN	0.555556	0.515152	0.555556	NaN	0.604167	NaN	0.5	0	0.5	0.962963	NaN		0.664632	1.75202e-05	TURE	TURE	2150		bin43	0	0.444444	0	0.25	0	0.111111	NaN	0.111111	0	0	0.444444	0.333333	0
bin44	1	1	NaN	NaN	NaN	0	NaN	0	0.5	1	NaN	0.144841	0.833333	1	1	0.5	NaN	0.5	0.355556	0.166667	NaN	0.606061	NaN	0.5	0	0.5	1	NaN		0.558235	0.00252421	TURE	FALSE	2200		bin44	0	0.347222	0	0	0	0	NaN	0	NaN	NaN	0.5	0.222222	0
bin45	1	NaN	NaN	NaN	NaN	NaN	NaN	0	0.333333	NaN	NaN	0.305556	1	NaN	NaN	1	NaN	1	0.6	0.5	NaN	0.503788	NaN	0.5	1	0.666667	1	NaN		0.672096	0.000816135	TURE	TURE	2250		bin45	0	0.305556	NaN	NaN	NaN	0	NaN	0	NaN	NaN	0.5	0.2	0
bin46	NaN	NaN	NaN	NaN	NaN	NaN	NaN	0	0	NaN	NaN	0.166667	1	NaN	NaN	NaN	NaN	NaN	0.75	0.5	NaN	0.511111	NaN	0.833333	NaN	1	1	NaN		0.576111	0.0601588	FALSE	FALSE	2300		bin46	NaN	0.111111	NaN	NaN	NaN	0.666667	NaN	0	NaN	NaN	0.444444	0.216667	0
bin47	NaN	NaN	NaN	NaN	NaN	NaN	NaN	0	0	NaN	NaN	0	1	NaN	NaN	NaN	NaN	NaN	1	0.5	NaN	0.5	NaN	1	NaN	0.666667	1	NaN		0.566667	0.0473098	TURE	FALSE	2350		bin47	NaN	NaN	NaN	NaN	NaN	1	NaN	NaN	NaN	NaN	0.666667	0.0833333	0
bin48	NaN	NaN	NaN	NaN	NaN	NaN	NaN	NaN	0	NaN	NaN	0	1	NaN	NaN	NaN	NaN	NaN	1	0.5	NaN	0.583333	NaN	1	NaN	0.666667	1	NaN		0.638889	0.0417038	TURE	FALSE	2400		bin48	NaN	NaN	NaN	NaN	NaN	1	NaN	NaN	NaN	NaN	NaN	0	0
bin49	NaN	NaN	NaN	NaN	NaN	NaN	NaN	NaN	0.333333	NaN	NaN	0	NaN	NaN	NaN	NaN	NaN	NaN	1	0	NaN	0.5	NaN	1	NaN	0.833333	1	NaN		0.583333	0.42265	FALSE	FALSE	2450		bin49	NaN	NaN	NaN	NaN	NaN	NaN	NaN	NaN	NaN	NaN	NaN	0	NaN
bin50	NaN	NaN	NaN	NaN	NaN	NaN	NaN	NaN	NaN	NaN	NaN	0	NaN	NaN	NaN	NaN	NaN	NaN	NaN	NaN	NaN	0.333333	NaN	1	NaN	1	NaN	NaN		0.583333	0.5	FALSE	FALSE	2500		bin50	NaN	NaN	NaN	NaN	NaN	NaN	NaN	NaN	NaN	NaN	NaN	0	NaN
AVE																																				AVE
DL NEU																																				DL NEU
CUED	S13	S14	S15	S16	S17	S18	S19	S20	S21	S22	S23	S24	S25	S26	S27	S28	S29	S31	S32	S33	S34	S35	S36	S37	S38	S39	S40	S41		AVE	T-test			time (ms)		UNCUED	S13	S14	S15	S16	S17	S18	S19	S20	S21	S22	S23	S24	S25
bin1	0.570707	0.65	0.5	0.421053	0.368421	0	0.571429	0.764706	0.55	0.4375	0.561404	0.529412	0.611111	0.422078	0.333333	0.375	0.65	0.564103	0.666667	0.470588	0.458333	0.631579	0.611111	0.590909	0.388889	0.388889	0.5	0.363636		0.498245	0.757195	FALSE	FALSE	50		bin1	0.646465	0.263158	0.603175	0.31746	0.587302	0.54386	0.461538	0.221053	0.425926	0.695652	0.428571	0.5	0.46176
bin2	0.538462	0.7	0.5	0.403509	0.368421	0	0.571429	0.764706	0.55	0.4375	0.54386	0.529412	0.583333	0.428571	0.333333	0.375	0.666667	0.538462	0.666667	0.470588	0.472222	0.631579	0.611111	0.590909	0.388889	0.388889	0.5	0.363636		0.497041	0.840094	FALSE	FALSE	100		bin2	0.637719	0.263158	0.608947	0.333333	0.603175	0.540541	0.461538	0.298246	0.388889	0.695652	0.428571	0.5	0.492063
bin3	0.553419	0.716667	0.5	0.368421	0.385965	0	0.571429	0.810458	0.55	0.4375	0.526316	0.529412	0.583333	0.415584	0.277778	0.375	0.75	0.525641	0.666667	0.470588	0.458333	0.631579	0.611111	0.590909	0.423747	0.388889	0.5	0.363636		0.499371	0.731755	FALSE	FALSE	150		bin3	0.602899	0.268031	0.62482	0.333333	0.587302	0.513514	0.461538	0.315789	0.388889	0.681159	0.460317	0.5	0.47619
bin4	0.642857	0.75	0.487179	0.368421	0.368421	0	0.571429	0.804094	0.533333	0.4375	0.526316	0.529412	0.583333	0.363636	0.296296	0.375	0.75	0.549451	0.666667	0.470588	0.458333	0.614035	0.595861	0.545455	0.425926	0.388889	0.537037	0.363636		0.500111	0.775787	FALSE	FALSE	200		bin4	0.627141	0.296296	0.605676	0.349206	0.52381	0.491228	0.461538	0.315789	0.425926	0.652174	0.428571	0.5	0.47619
bin5	0.642857	0.783333	0.644134	0.385965	0.385965	0	0.571429	0.754386	0.5	0.4375	0.526316	0.568627	0.583333	0.31746	0.518519	0.375	0.7	0.60989	0.666667	0.470588	0.416667	0.614035	0.62963	0.606061	0.425926	0.388889	0.555556	0.484848		0.520128	0.953103	FALSE	FALSE	250		bin5	0.564668	0.333333	0.648504	0.380952	0.539683	0.508772	0.487179	0.315789	0.5	0.652174	0.428571	0.566667	0.530303
bin6	0.6337	0.8	0.727273	0.45614	0.649123	0.333333	0.714286	0.814815	0.533333	0.4375	0.508772	0.764706	0.583333	0.307359	0.740741	0.418981	0.7	0.833333	0.68254	0.490196	0.416667	0.596491	0.666667	0.69697	0.462963	0.425926	0.574074	0.515152		0.588728	0.71834	FALSE	FALSE	300		bin6	0.619048	0.333333	0.684444	0.428571	0.68254	0.561404	0.538462	0.350877	0.5	0.73913	0.460317	0.753175	0.545455
bin7	0.568765	0.8	0.772727	0.438596	0.947368	0.166667	0.714286	0.888889	0.566667	0.520833	0.526316	0.862745	0.583333	0.378788	0.907407	0.444444	0.7	0.944444	0.730159	0.627451	0.507246	0.578947	0.666667	0.772727	0.5	0.481481	0.611111	0.815152		0.643686	0.846553	FALSE	FALSE	350		bin7	0.652174	0.333333	0.813333	0.507937	0.783333	0.614035	0.589744	0.368421	0.5	0.73913	0.492063	0.904762	0.590909
bin8	0.542929	0.766667	0.832556	0.421053	0.947368	0	0.714286	0.8577	0.6	0.5625	0.508772	0.941176	0.583333	0.546898	0.944444	0.574074	0.7	1	0.809524	0.764706	0.535024	0.561404	0.647059	0.772727	0.537037	0.631579	0.592593	0.966667		0.673646	0.824833	FALSE	FALSE	400		bin8	0.687371	0.333333	0.892222	0.571429	0.95	0.631579	0.615385	0.368421	0.5	0.768116	0.52381	0.952381	0.590909
bin9	0.524411	0.766667	0.883838	0.473684	0.947368	0.166667	0.714286	0.877193	0.633333	0.5625	0.526316	1	0.583333	0.645743	0.944444	0.611111	0.7	1	0.936508	0.823529	0.541667	0.526316	0.718056	0.772727	0.592593	0.684211	0.574074	1		0.704663	0.821618	FALSE	FALSE	450		bin9	0.750361	0.345029	0.912934	0.698413	0.95	0.631579	0.615385	0.438596	0.537037	0.826087	0.52381	0.952381	0.545455
bin10	0.556818	0.733333	0.966667	0.461816	0.963938	0.5	0.720238	0.81489	0.596825	0.541667	0.504723	1	0.569444	0.706527	0.938064	0.570905	0.72807	1	1	0.869207	0.583333	0.511789	0.730021	0.819084	0.619529	0.644444	0.536492	1		0.720994	0.98099	FALSE	FALSE	500		bin10	0.782107	0.348178	0.9	0.670635	0.944444	0.652906	0.567119	0.512821	0.707407	0.804473	0.599206	1	0.506494
bin11	0.598485	0.666667	1	0.494245	1	0.5	0.575397	0.872368	0.630952	0.604167	0.515038	1	0.525641	0.757809	0.961874	0.657407	0.679202	1	1	0.739496	0.527778	0.440789	0.584722	0.792569	0.597222	0.684343	0.57037	1		0.713448	0.758107	FALSE	FALSE	550		bin11	0.781746	0.359231	0.877508	0.705556	0.965789	0.660661	0.706553	0.543494	0.578704	0.764366	0.484127	1	0.537198
bin12	0.583333	0.683333	1	0.473684	1	0.5	0.642857	0.894737	0.571429	0.666667	0.54386	1	0.538462	0.708514	0.944444	0.574074	0.666667	0.952381	1	0.823529	0.541667	0.526316	0.735294	0.80303	0.611111	0.666667	0.481481	1		0.719055	0.926999	FALSE	FALSE	600		bin12	0.746032	0.315789	0.935385	0.698413	0.951587	0.648649	0.641026	0.526316	0.648148	0.782609	0.52381	1	0.521739
bin13	0.512821	0.65	0.911616	0.473684	1	0.5	0.642857	0.842105	0.587302	0.6875	0.561404	1	0.538462	0.678211	0.944444	0.481481	0.683333	0.877289	1	0.823529	0.541667	0.561404	0.75	0.757576	0.611111	0.672515	0.425926	1		0.704151	0.82576	FALSE	FALSE	650		bin13	0.693582	0.315789	0.960513	0.666667	0.952381	0.648649	0.628205	0.526316	0.611111	0.782609	0.52381	1	0.565217
bin14	0.525641	0.666667	0.90303	0.473684	0.912281	0.5	0.642857	0.842105	0.492063	0.6875	0.578947	1	0.538462	0.603175	0.944444	0.407407	0.7	0.641026	1	0.823529	0.541667	0.578947	0.768254	0.636364	0.588235	0.684211	0.388889	0.966667		0.679859	0.891988	FALSE	FALSE	700		bin14	0.714286	0.315789	0.948718	0.619048	0.952381	0.630631	0.615385	0.438596	0.555556	0.782609	0.587302	1	0.521739
bin15	0.5	0.65	0.892593	0.481481	0.890838	0.5	0.619048	0.824561	0.47619	0.6875	0.578947	1	0.538462	0.666667	0.944444	0.444444	0.7	0.692308	1	0.816176	0.541667	0.508772	0.785714	0.606061	0.588235	0.684211	0.351852	0.936364		0.675233	0.986603	FALSE	FALSE	750		bin15	0.692641	0.350877	0.918889	0.619048	0.904762	0.648649	0.576923	0.421053	0.555556	0.782609	0.603175	1	0.521739
bin16	0.538462	0.633333	0.692593	0.37037	0.833333	0.5	0.571429	0.701754	0.47619	0.708333	0.526316	1	0.538462	0.651515	0.87037	0.407407	0.7	0.641026	0.859649	0.770833	0.555556	0.473684	0.789744	0.545455	0.577342	0.596491	0.333333	0.909091		0.634717	0.969911	FALSE	FALSE	800		bin16	0.611331	0.368421	0.768116	0.619048	0.873016	0.597884	0.525641	0.421053	0.537037	0.782609	0.619048	1	0.528382
bin17	0.538462	0.6	0.772727	0.333333	0.833333	0.5	0.571429	0.446394	0.428571	0.673611	0.561404	1	0.538462	0.545455	0.777778	0.372549	0.65	0.571429	0.54386	0.622222	0.541667	0.45614	0.762821	0.454545	0.462963	0.526316	0.333333	0.848485		0.580975	0.911023	FALSE	FALSE	850		bin17	0.650794	0.280702	0.580556	0.603175	0.857143	0.552381	0.5	0.368421	0.537037	0.705534	0.571429	1	0.541667
bin18	0.538462	0.6	0.757576	0.388889	0.684211	0.5	0.571429	0.407407	0.380952	0.642857	0.563353	0.818627	0.538462	0.545455	0.685185	0.372549	0.6	0.577976	0.391813	0.644444	0.583333	0.438596	0.68254	0.348485	0.388889	0.491228	0.333333	0.909091		0.549469	0.577239	FALSE	FALSE	900		bin18	0.594517	0.280702	0.528986	0.571429	0.84127	0.504762	0.474359	0.192982	0.462963	0.666667	0.592982	0.952381	0.528382
bin19	0.540793	0.6	0.727273	0.462963	0.631579	0.5	0.571429	0.388889	0.333333	0.571429	0.555556	0.705882	0.589744	0.515152	0.481481	0.411765	0.6	0.5	0.333333	0.625	0.541667	0.403509	0.631373	0.393939	0.267974	0.438596	0.388889	0.848485		0.520001	0.832589	FALSE	FALSE	950		bin19	0.551438	0.22807	0.521739	0.571429	0.809524	0.495238	0.461538	0.0526316	0.444444	0.621212	0.578947	0.904762	0.507246
bin20	0.545455	0.6	0.751515	0.444444	0.617934	0.5	0.571429	0.425926	0.380952	0.571429	0.5	0.588235	0.615385	0.55267	0.407407	0.372549	0.583333	0.511111	0.259259	0.5625	0.486111	0.368421	0.647059	0.378788	0.215686	0.392788	0.388889	0.787879		0.50097	0.896936	FALSE	FALSE	1000		bin20	0.639683	0.263158	0.492754	0.52381	0.714286	0.504762	0.461538	0.0526316	0.444444	0.590909	0.561404	0.793651	0.485507
bin21	0.657576	0.610526	0.696429	0.506181	0.578704	0.5	0.603175	0.406486	0.50119	0.557143	0.549156	0.606443	0.56044	0.476852	0.333551	0.319444	0.561111	0.53367	0.142157	0.512821	0.573232	0.359893	0.65891	0.369408	0.156046	0.333063	0.411681	0.69798		0.491902	0.924655	FALSE	FALSE	1050		bin21	0.655263	0.273478	0.484848	0.54127	0.638889	0.566667	0.487179	0.042328	0.487179	0.573022	0.546956	0.625731	0.418314
bin22	0.575	0.560791	0.65	0.5	0.621324	0.5	0.547619	0.441176	0.515873	0.560684	0.579487	0.569264	0.598485	0.522367	0.381944	0.369048	0.538462	0.511111	0.0834967	0.468056	0.533333	0.387927	0.637598	0.384712	0.201389	0.397487	0.367414	0.777778		0.492208	0.585073	FALSE	FALSE	1100		bin22	0.628385	0.264423	0.433684	0.52381	0.543024	0.484848	0.444976	0.0589597	0.415344	0.630592	0.476389	0.588889	0.436977
bin23	0.667677	0.603509	0.583333	0.54386	0.611111	0.5	0.571429	0.407407	0.47619	0.533333	0.643275	0.431373	0.571429	0.545455	0.277778	0.333333	0.448246	0.5	0.0555556	0.4375	0.541667	0.356725	0.647059	0.421356	0.176471	0.388889	0.388889	0.666667		0.476054	0.903043	FALSE	FALSE	1150		bin23	0.600289	0.210526	0.391667	0.52381	0.555556	0.490741	0.461538	0.0555556	0.425926	0.606061	0.49127	0.52381	0.471618
bin24	0.666667	0.655263	0.5	0.578947	0.611111	0.5	0.571429	0.461874	0.47619	0.533333	0.578947	0.411765	0.595238	0.545455	0.277778	0.294118	0.483333	0.5	0.0555556	0.4375	0.541667	0.368421	0.647059	0.409091	0.169935	0.388889	0.388889	0.545455		0.471211	0.992069	FALSE	FALSE	1200		bin24	0.600289	0.195906	0.347222	0.52381	0.571429	0.486236	0.461538	0.111111	0.425926	0.636364	0.507937	0.52381	0.478261
bin25	0.615385	0.621053	0.542929	0.561404	0.611111	0.5	0.571429	0.509804	0.47619	0.533333	0.473684	0.411765	0.619048	0.545455	0.277778	0.294118	0.5	0.5625	0.0555556	0.4375	0.541667	0.356725	0.647059	0.424242	0.203704	0.388889	0.388889	0.454545		0.468777	0.8167	FALSE	FALSE	1250		bin25	0.619048	0.263158	0.375	0.52381	0.571429	0.472723	0.461538	0.117647	0.407407	0.606061	0.47619	0.52381	0.449275
bin26	0.604701	0.683333	0.5	0.54386	0.555556	0.5	0.571429	0.588235	0.47619	0.488889	0.473684	0.411765	0.571429	0.515152	0.166667	0.294118	0.5	0.520833	0.0555556	0.375	0.486111	0.403509	0.647059	0.484848	0.222222	0.388889	0.388889	0.484848		0.460813	0.699934	FALSE	FALSE	1300		bin26	0.596825	0.263158	0.342222	0.507937	0.571429	0.429894	0.371795	0.0784314	0.481481	0.590909	0.539683	0.52381	0.434783
bin27	0.555556	0.666667	0.257576	0.561404	0.658869	0.5	0.5	0.54902	0.507937	0.222222	0.45614	0.411765	0.5	0.554113	0.037037	0.27451	0.483333	0.458333	0.0925926	0.319853	0.486111	0.491228	0.666667	0.412698	0.222222	0.388889	0.388889	0.624242		0.437424	0.543591	FALSE	FALSE	1350		bin27	0.630592	0.263158	0.292564	0.52381	0.52381	0.457143	0.230769	0.0980392	0.37037	0.531025	0.612698	0.52381	0.430556
bin28	0.401515	0.661404	0.224242	0.578947	0.701754	0.5	0.5	0.54902	0.507937	0.2	0.407407	0.411765	0.380952	0.578644	0	0.156863	0.666667	0.420343	0.277778	0.294118	0.513889	0.54386	0.635076	0.349206	0.203704	0.296296	0.388889	0.6		0.426796	0.278278	FALSE	FALSE	1400		bin28	0.546176	0.298246	0.236111	0.47619	0.396825	0.446176	0.153846	0.160539	0.37037	0.52381	0.6	0.507937	0.304348
bin29	0.352564	0.684211	0.333333	0.54386	0.666667	0.333333	0.52381	0.518519	0.491228	0.133333	0.333333	0.372549	0.357143	0.587302	0	0.203704	0.754386	0.392157	0.444444	0.431373	0.458333	0.45614	0.720588	0.333333	0.166667	0.296296	0.383442	0.757576		0.429629	0.13674	FALSE	FALSE	1450		bin29	0.530303	0.315789	0.208694	0.47619	0.2	0.424242	0.115385	0.1875	0.296296	0.52381	0.590476	0.31746	0.275362
bin30	0.324176	0.614035	0.30303	0.631579	0.759259	0	0.855311	0.594907	0.5	0.133333	0.37037	0.529412	0.428571	0.57115	0.148148	0.22658	0.754386	0.454167	0.561404	0.45098	0.56401	0.508772	0.848611	0.349206	0.185185	0.388889	0.431373	0.818182		0.47518	0.0424565	TURE	FALSE	1500		bin30	0.550725	0.368421	0.142857	0.460317	0.15	0.44593	0.152464	0.1875	0.339869	0.434921	0.539683	0.412698	0.26087
bin31	0.410256	0.596491	0.257407	0.578947	0.685185	0	0.948718	0.652778	0.483333	0.377778	0.526316	0.529412	0.428571	0.584967	0.425926	0.501225	0.796296	0.47619	0.708577	0.588235	0.642424	0.54386	0.810623	0.619048	0.296296	0.574074	0.470588	0.761616		0.545541	0.00246863	TURE	FALSE	1550		bin31	0.536232	0.294118	0.152882	0.460317	0.151754	0.520833	0.254658	0.1875	0.313725	0.5	0.492063	0.539683	0.26087
bin32	0.47619	0.570175	0.407407	0.438596	0.641612	0	1	0.84127	0.616667	0.666667	0.684211	0.607843	0.47619	0.583333	0.703704	0.723611	0.884532	0.538462	0.824561	0.686275	0.639683	0.649123	0.700855	0.746032	0.368056	0.611111	0.490196	0.684524		0.61646	0.000106529	TURE	TURE	1600		bin32	0.575852	0.313725	0.196487	0.412698	0.115468	0.569892	0.220588	0.195833	0.352941	0.566667	0.266667	0.492063	0.272727
bin33	0.538462	0.616667	0.606481	0.436647	0.5625	0	1	0.901099	0.703021	0.815873	0.561404	0.571078	0.642857	0.520833	0.925926	0.844444	0.738095	0.638889	0.859649	0.705882	0.690265	0.684211	0.60101	0.809524	0.479167	0.588235	0.627451	0.698413		0.656003	6.23114e-06	TURE	TURE	1650		bin33	0.47619	0.444444	0.224265	0.483333	0.180952	0.477778	0.15455	0.119048	0.322304	0.491228	0.3	0.47619	0.287879
bin34	0.589744	0.616667	0.821429	0.444444	0.402564	0	1	0.888889	0.745643	0.928571	0.589669	0.5625	0.794872	0.477778	0.981481	0.884127	0.598901	0.694444	0.846405	0.720588	0.833333	0.578947	0.481481	0.829004	0.520833	0.645833	0.705882	0.711111		0.674827	3.03656e-06	TURE	TURE	1700		bin34	0.433333	0.518519	0.374603	0.430702	0.195971	0.423235	0.0969697	0.0833333	0.377778	0.417957	0.333333	0.47619	0.348485
bin35	0.666667	0.666667	0.857143	0.530637	0.349784	0	1	0.972222	0.72619	0.928571	0.529412	0.5625	0.717949	0.797619	1	0.904762	0.502331	0.772727	0.83701	0.720635	0.798653	0.526316	0.4	0.798485	0.541667	0.768561	0.735294	0.766667		0.692088	2.3248e-05	TURE	TURE	1750		bin35	0.433333	0.648148	0.459402	0.387628	0.261111	0.479444	0	0.0883838	0.43956	0.411765	0.350585	0.444444	0.454545
bin36	0.606061	0.638596	0.84127	0.586081	0.409524	0	1	0.884259	0.583333	0.923077	0.5	0.520833	0.615385	0.909091	1	0.913753	0.45	0.872727	0.825	0.691087	0.689815	0.45614	0.3	0.852597	0.488889	0.785185	0.768519	0.722222		0.672623	0.000217869	TURE	TURE	1800		bin36	0.483292	0.722222	0.389069	0.314076	0.261905	0.462388	0	0.151515	0.553419	0.334887	0.362963	0.444444	0.609668
bin37	0.587121	0.635076	0.777778	0.656566	0.305556	0	1	0.869048	0.607407	0.916667	0.603175	0.458333	0.564103	0.925	1	0.966667	0.305556	0.866667	0.666667	0.786325	0.355556	0.403509	0	0.919118	0.409951	0.694444	0.666667	0.666667		0.629058	0.0028024	TURE	FALSE	1850		bin37	0.465079	0.788235	0.555556	0.297009	0.333333	0.357298	0	0.207407	0.594444	0.311905	0.407407	0.257937	0.585965
bin38	0.466667	0.687179	0.75	0.756614	0.333333	1	1	0.809524	0.555556	0.817701	0.812963	0.479167	0.457265	1	1	1	0.277778	0.775926	0.666667	0.82963	0.25	0.491228	0	0.953968	0.405483	0.644444	0.583333	1		0.671587	0.000922508	TURE	TURE	1900		bin38	0.375758	0.719577	0.444444	0.343434	0.366667	0.181097	0	0.341931	0.528042	0.277778	0.456944	0.233333	0.60039
bin39	0.388889	0.748485	1	0.904762	0.166667	1	NaN	0.68254	0.518519	0.698413	0.875	0.608059	0.5	1	0.923077	0.933333	0	0.75	0.555556	0.888889	0.333333	0.537037	0	1	0.0833333	0.5	0.587073	NaN		0.622422	0.0149205	TURE	FALSE	1950		bin39	0.481481	0.668651	0.555556	0.4617	0.5	0.100673	0	0.2	0.396825	0.333333	0.441725	0.216667	0.599537
bin40	1	0.742424	NaN	1	0.333333	1	NaN	0.45	0.428571	0.216667	0.952381	0.5	0.636364	1	0.833333	1	0.333333	0.625	0.488889	0.888889	0	0.509804	NaN	1	0	0.333333	0.5	NaN		0.615513	0.00637373	TURE	FALSE	2000		bin40	0.320635	0.666667	0.611111	0.416667	0.5	0.148148	0	0.333333	0.244444	0.222222	0.174242	0.174854	0.4875
bin41	1	0.722222	NaN	1	1	1	NaN	0.305556	0.266667	0	1	0.457071	0.447811	1	0.810185	1	1	0.244444	0.5	0.784392	NaN	0.570406	NaN	1	0	0.333333	0.478114	NaN		0.648704	0.000176782	TURE	TURE	2050		bin41	0	0.206349	0.5	0.466667	0.666667	0.111111	NaN	0.305556	0.233333	0	0.15873	0.212963	0.374417
bin42	1	0.555556	NaN	1	1	1	NaN	0.333333	0.783333	0	1	0.5	0.579365	1	0.952381	0.833333	1	0.0833333	0.461538	0.633333	NaN	0.661111	NaN	1	0	0.333333	0.285714	NaN		0.651985	2.66584e-05	TURE	TURE	2100		bin42	0	0.261111	0.666667	0.25	0	0.180556	NaN	0	0.222222	0	0.216667	0.302564	0.301587
bin43	1	0.466667	NaN	NaN	NaN	1	NaN	0.333333	1	0	1	0.5	0.638889	1	1	0.5	1	0.333333	0.44425	0.666667	NaN	0.666667	NaN	1	0	0.222222	0.411111	NaN		0.627769	0.000113222	TURE	TURE	2150		bin43	0	0.444444	0	0.25	0	0.166667	NaN	NaN	0	NaN	0.25	0.406061	0.277778
bin44	1	0.5	NaN	NaN	NaN	NaN	NaN	0.444444	1	1	1	0.47619	0.611111	1	1	1	1	0.444444	0.518519	1	NaN	0.559524	NaN	1	0	0	0.111111	NaN		0.683267	0.00079247	TURE	TURE	2200		bin44	0	0.5	0	0.111111	0	0.188889	NaN	NaN	0	NaN	0.333333	0.462963	0.133333
bin45	1	0.666667	NaN	NaN	NaN	NaN	NaN	0.888889	NaN	NaN	NaN	0.579365	0.555556	1	1	1	NaN	NaN	0.444444	1	NaN	0.466667	NaN	NaN	0	0.166667	0.666667	NaN		0.673923	0.0346872	TURE	FALSE	2250		bin45	0	0.333333	0	0	NaN	0.133333	NaN	NaN	0	NaN	0.5	0.333333	0
bin46	NaN	1	NaN	NaN	NaN	NaN	NaN	1	NaN	NaN	NaN	0.733333	1	NaN	1	NaN	NaN	NaN	1	1	NaN	0.305556	NaN	NaN	0	0.333333	1	NaN		0.761111	0.11474	FALSE	FALSE	2300		bin46	0	0	0	0	NaN	0	NaN	NaN	0	NaN	NaN	0.444444	0
bin47	NaN	NaN	NaN	NaN	NaN	NaN	NaN	1	NaN	NaN	NaN	0.766667	1	NaN	1	NaN	NaN	NaN	1	1	NaN	0.777778	NaN	NaN	NaN	1	1	NaN		0.949383	0.0465611	TURE	FALSE	2350		bin47	NaN	0	1	0	NaN	0	NaN	NaN	0	NaN	NaN	0.166667	0
bin48	NaN	NaN	NaN	NaN	NaN	NaN	NaN	1	NaN	NaN	NaN	0.694444	1	NaN	1	NaN	NaN	NaN	NaN	NaN	NaN	NaN	NaN	NaN	NaN	1	1	NaN		0.949074	0.2151	FALSE	FALSE	2400		bin48	NaN	NaN	NaN	0	NaN	0	NaN	NaN	NaN	NaN	NaN	0	NaN
bin49	NaN	NaN	NaN	NaN	NaN	NaN	NaN	1	NaN	NaN	NaN	0.833333	1	NaN	NaN	NaN	NaN	NaN	NaN	NaN	NaN	NaN	NaN	NaN	NaN	NaN	1	NaN		0.958333	0.5	FALSE	FALSE	2450		bin49	NaN	NaN	NaN	0	NaN	1	NaN	NaN	NaN	NaN	NaN	0	NaN
bin50	NaN	NaN	NaN	NaN	NaN	NaN	NaN	1	NaN	NaN	NaN	1	1	NaN	NaN	NaN	NaN	NaN	NaN	NaN	NaN	NaN	NaN	NaN	NaN	NaN	1	NaN		1	#DIV/0!	#DIV/0!	#DIV/0!	2500		bin50	NaN	NaN	NaN	NaN	NaN	1	NaN	NaN	NaN	NaN	NaN	NaN	NaN
AVE																																				AVE
DL HAP																																				DL HAP
CUED	S13	S14	S15	S16	S17	S18	S19	S20	S21	S22	S23	S24	S25	S26	S27	S28	S29	S31	S32	S33	S34	S35	S36	S37	S38	S39	S40	S41		AVE	T-test			time (ms)		UNCUED	S13	S14	S15	S16	S17	S18	S19	S20	S21	S22	S23	S24	S25
bin1	0.581871	0.565217	0.375	0.384615	0.407407	0.482759	0.8	0.511029	0.333333	0.388889	0.4	0.444444	0.47619	0.396825	0.534211	0.25	0.555556	0.470588	0.571429	0.333333	0.47619	0.611111	0.419048	0.52381	0.666667	0.520833	0.54386	0.527778		0.484	0.21177	FALSE	FALSE	50		bin1	0.468056	0.5625	0.666959	0.538462	0.5	0.47619	0.37931	0.444444	0.578947	0.5	0.631579	0.473684	0.675214
bin2	0.627451	0.565217	0.375	0.384615	0.388889	0.482759	0.8	0.4375	0.403509	0.407407	0.4	0.444444	0.47619	0.380952	0.583333	0.25	0.555556	0.470588	0.571429	0.333333	0.557143	0.537037	0.428571	0.571429	0.666667	0.5625	0.462963	0.727273		0.494706	0.325166	FALSE	FALSE	100		bin2	0.5	0.520833	0.661404	0.525641	0.454545	0.571429	0.37931	0.428571	0.578947	0.5	0.631579	0.473684	0.666667
bin3	0.660539	0.565217	0.411765	0.384615	0.388889	0.482759	0.8	0.4375	0.385965	0.444444	0.4	0.444444	0.47619	0.428571	0.6	0.25	0.555556	0.450427	0.571429	0.333333	0.47619	0.518519	0.453968	0.587302	0.666667	0.5625	0.444444	0.727273		0.496732	0.369267	FALSE	FALSE	150		bin3	0.488889	0.5	0.62807	0.538462	0.454545	0.571429	0.37931	0.428571	0.596491	0.5	0.614035	0.473684	0.75
bin4	0.686275	0.550725	0.45098	0.384615	0.388889	0.471264	0.8	0.5	0.368421	0.444444	0.4	0.444444	0.47619	0.444444	0.633333	0.25	0.5	0.395299	0.571429	0.333333	0.507937	0.481481	0.466667	0.619048	0.666667	0.5625	0.422658	0.7		0.49718	0.336613	FALSE	FALSE	200		bin4	0.538889	0.5	0.6	0.538462	0.454545	0.571429	0.37931	0.428571	0.684211	0.484848	0.596491	0.45614	0.75
bin5	0.722222	0.521739	0.588235	0.384615	0.518519	0.482759	0.8	0.541667	0.421053	0.462963	0.4	0.444444	0.47619	0.47619	0.716667	0.25	0.518519	0.666667	0.571429	0.333333	0.47619	0.5	0.453968	0.68254	0.666667	0.520833	0.470588	0.712121		0.527861	0.231931	FALSE	FALSE	250		bin5	0.538462	0.511111	0.660819	0.538462	0.5	0.666667	0.37931	0.439394	0.684211	0.469697	0.631579	0.561404	0.75
bin6	0.736842	0.536232	0.647059	0.384615	0.662309	0.609195	0.9	0.625	0.438596	0.537037	0.466667	0.530501	0.47619	0.47619	0.9	0.3	0.555556	0.861111	0.619048	0.37037	0.47619	0.5	0.571429	0.777778	0.75	0.588235	0.490196	0.787879		0.591937	0.469272	FALSE	FALSE	300		bin6	0.538462	0.533333	0.740741	0.538462	0.621212	0.857143	0.471264	0.454545	0.719298	0.545455	0.508772	0.54386	0.75
bin7	0.754386	0.542874	0.72549	0.384615	0.941176	0.666667	0.9	0.588235	0.385965	0.537037	0.516667	0.72549	0.507937	0.492063	0.916667	0.4	0.555556	0.972222	0.738095	0.462963	0.428571	0.5	0.571429	0.873016	0.833333	0.627451	0.529412	1		0.645618	0.847349	FALSE	FALSE	350		bin7	0.615385	0.533333	0.750487	0.538462	0.848485	0.857143	0.517241	0.439394	0.736842	0.515152	0.438596	0.684211	0.75
bin8	0.800826	0.541667	0.777778	0.384615	1	0.758621	0.9	0.588235	0.421053	0.518519	0.583333	1	0.52381	0.587302	0.95	0.516667	0.574074	0.923077	0.857143	0.62963	0.428571	0.5	0.642857	0.904762	0.833333	0.705882	0.470588	1		0.690084	0.685517	FALSE	FALSE	400		bin8	0.692308	0.533333	0.89269	0.564103	1	0.857143	0.551724	0.454545	0.77193	0.5	0.54386	0.789474	0.833333
bin9	0.826797	0.569444	0.780093	0.384615	1	0.816092	0.9	0.588235	0.421053	0.555556	0.55	1	0.492063	0.650794	0.966667	0.55	0.611111	0.974359	1	0.703704	0.409524	0.5	0.666667	0.968254	0.861111	0.745098	0.480392	0.972222		0.71228	0.545212	FALSE	FALSE	450		bin9	0.74359	0.555556	0.9	0.576923	1	0.857143	0.609195	0.469697	0.736842	0.545455	0.561404	0.894737	0.79798
bin10	0.791667	0.585859	0.901961	0.378205	1	0.84997	0.811111	0.602241	0.447368	0.558279	0.497661	1	0.473016	0.738095	1	0.5	0.61939	1	1	0.712251	0.447619	0.484848	0.641636	1	0.944444	0.76816	0.494302	1		0.723146	0.586946	FALSE	FALSE	500		bin10	0.730519	0.608333	0.938889	0.621327	1	0.821429	0.559626	0.502331	0.721997	0.609668	0.608187	0.906015	0.612121
bin11	0.743056	0.605072	0.929256	0.407051	1	0.788683	0.762963	0.676004	0.425926	0.613426	0.606516	1	0.484127	0.650794	1	0.588437	0.611111	0.974359	1	0.748148	0.501557	0.531863	0.719658	0.968254	0.877778	0.734069	0.457895	1		0.728786	0.306438	FALSE	FALSE	550		bin11	0.702964	0.590476	0.902863	0.586946	1	0.904762	0.693316	0.572294	0.625731	0.556619	0.626351	1	0.656566
bin12	0.804167	0.583333	0.939951	0.461538	1	0.827586	0.8	0.647059	0.466667	0.611111	0.583333	1	0.444444	0.638889	1	0.583333	0.666667	0.928327	1	0.722222	0.47619	0.5	0.666667	0.900794	0.916667	0.72549	0.491228	1		0.728059	0.724123	FALSE	FALSE	600		bin12	0.534921	0.608333	0.968254	0.615385	1	0.952381	0.62069	0.575758	0.578947	0.577922	0.631579	1	0.636364
bin13	0.780637	0.569444	0.943355	0.461538	1	0.827586	0.8	0.666667	0.5	0.611111	0.55	1	0.428571	0.55	1	0.633333	0.62963	0.866667	1	0.722222	0.484127	0.5	0.666667	0.85	0.916667	0.745098	0.526316	1		0.722487	0.746149	FALSE	FALSE	650		bin13	0.6	0.5625	1	0.615385	0.984848	1	0.551724	0.560606	0.45614	0.619048	0.631579	1	0.636364
bin14	0.754902	0.541667	0.942266	0.461538	1	0.827586	0.8	0.6875	0.483333	0.611111	0.55	1	0.428571	0.516667	1	0.566667	0.611111	0.888889	1	0.722222	0.524603	0.481481	0.666667	0.85	0.916667	0.705882	0.54386	1		0.717257	0.692541	FALSE	FALSE	700		bin14	0.571429	0.479167	0.984127	0.589744	0.954545	1	0.482759	0.545455	0.403509	0.619048	0.661793	1	0.606061
bin15	0.766667	0.555556	0.939951	0.461538	0.962963	0.827586	0.8	0.729167	0.35	0.611111	0.534211	1	0.428571	0.466667	0.95	0.5	0.555556	0.866667	0.97619	0.750545	0.516667	0.444444	0.666667	0.833333	0.916667	0.705882	0.614035	1		0.704666	0.732885	FALSE	FALSE	750		bin15	0.571429	0.5	0.936508	0.576923	0.939394	1	0.482759	0.545455	0.421053	0.619048	0.722222	1	0.636364
bin16	0.8125	0.583333	0.879902	0.461538	0.888889	0.827586	0.8	0.729167	0.35	0.537037	0.526316	1	0.444444	0.433333	0.933333	0.433333	0.611111	0.711111	0.833333	0.745098	0.47619	0.388889	0.588889	0.578947	0.833333	0.686275	0.578947	0.944444		0.664903	0.763211	FALSE	FALSE	800		bin16	0.571429	0.395833	0.714286	0.538974	0.893939	1	0.390805	0.545455	0.473684	0.619048	0.685185	1	0.7
bin17	0.791667	0.583333	0.658088	0.384615	0.833333	0.77381	0.8	0.645833	0.383333	0.5	0.54386	0.925926	0.444444	0.345238	0.8	0.433333	0.62963	0.644444	0.5	0.616558	0.492063	0.388889	0.511111	0.491228	0.722222	0.647059	0.578947	0.916667		0.60663	0.949335	FALSE	FALSE	850		bin17	0.538462	0.375	0.5	0.48	0.909091	1	0.37931	0.507937	0.473684	0.571429	0.611111	1	0.7
bin18	0.770833	0.583333	0.666667	0.410256	0.833333	0.686508	0.8	0.579657	0.333333	0.425926	0.599415	0.833333	0.444444	0.31746	0.55	0.35	0.666667	0.6	0.357143	0.5	0.444444	0.407407	0.5	0.526316	0.5	0.529412	0.578947	0.911616		0.560945	0.660524	FALSE	FALSE	900		bin18	0.538462	0.375	0.45	0.493333	0.848485	0.933333	0.37931	0.365079	0.491228	0.507937	0.578947	0.929825	0.7
bin19	0.780637	0.569444	0.625	0.461538	0.796296	0.679012	0.8	0.509804	0.287719	0.351852	0.631579	0.777778	0.507937	0.333333	0.55	0.35	0.666667	0.551471	0.190476	0.462963	0.47619	0.5	0.511111	0.54386	0.472222	0.411765	0.578947	0.909091		0.545953	0.636181	FALSE	FALSE	950		bin19	0.512821	0.375	0.507937	0.527778	0.727273	0.8	0.37931	0.301587	0.561404	0.52381	0.631579	0.877193	0.666667
bin20	0.705882	0.541667	0.520833	0.461538	0.77342	0.692308	0.8	0.338235	0.263158	0.277778	0.684211	0.759259	0.531025	0.253968	0.516667	0.316667	0.611111	0.529412	0.120879	0.407407	0.492063	0.481481	0.466667	0.578947	0.388889	0.372549	0.611111	0.848485		0.512344	0.344815	FALSE	FALSE	1000		bin20	0.5	0.375	0.52381	0.493357	0.676768	0.8	0.37931	0.301587	0.54386	0.52381	0.596491	0.789474	0.6
bin21	0.637908	0.506643	0.440705	0.290404	0.769668	0.689223	0.775926	0.275	0.359649	0.285918	0.671827	0.660131	0.545455	0.261905	0.485185	0.30098	0.615741	0.49418	0.132867	0.414478	0.42963	0.433551	0.447222	0.528822	0.180976	0.389636	0.585648	0.812121		0.479336	0.170697	FALSE	FALSE	1050		bin21	0.512821	0.375	0.561625	0.509804	0.496633	0.766667	0.415326	0.292857	0.685213	0.366667	0.615132	0.736842	0.6
bin22	0.685714	0.545034	0.579657	0.358974	0.784995	0.797222	0.819048	0.306373	0.242105	0.292484	0.691829	0.592628	0.516667	0.238095	0.481481	0.291423	0.592186	0.472652	0.201347	0.31746	0.434524	0.476496	0.467366	0.52385	0.333333	0.433333	0.475544	0.922078		0.495496	0.840499	FALSE	FALSE	1100		bin22	0.5383	0.363131	0.524603	0.541667	0.433712	0.755556	0.355438	0.207407	0.682018	0.555556	0.596078	0.583528	0.607143
bin23	0.665979	0.492754	0.588235	0.384615	0.777778	0.84	0.8	0.294118	0.263158	0.333333	0.596491	0.568627	0.552701	0.238095	0.466667	0.3	0.555556	0.491228	0.153846	0.339869	0.45	0.395425	0.466667	0.492105	0.25	0.411765	0.5	0.909091		0.484932	0.535438	FALSE	FALSE	1150		bin23	0.549451	0.490278	0.492063	0.534444	0.409091	0.722222	0.37931	0.2	0.736842	0.55	0.57115	0.589669	0.585185
bin24	0.686683	0.484848	0.588235	0.384615	0.777778	0.826667	0.8	0.294118	0.315789	0.333333	0.578947	0.519608	0.545455	0.246032	0.45	0.3	0.555556	0.473684	0.153846	0.333333	0.45	0.462963	0.466667	0.5	0.25	0.411765	0.5	0.909091		0.485679	0.559549	FALSE	FALSE	1200		bin24	0.488889	0.5	0.492063	0.538462	0.378788	0.666667	0.37931	0.2	0.736842	0.6	0.649123	0.578947	0.6
bin25	0.735294	0.5	0.519608	0.384615	0.777778	0.786667	0.8	0.294118	0.315789	0.333333	0.596686	0.5	0.545455	0.25	0.4	0.3	0.555556	0.508772	0.153846	0.333333	0.421053	0.518519	0.466667	0.516667	0.25	0.411765	0.491228	0.909091		0.484851	0.501912	FALSE	FALSE	1250		bin25	0.488889	0.5	0.5	0.538462	0.363636	0.722222	0.37931	0.3	0.754386	0.6	0.631579	0.561404	0.6
bin26	0.789474	0.5	0.518519	0.358974	0.814815	0.730769	0.733333	0.294118	0.315789	0.37037	0.566667	0.462963	0.5	0.25	0.3	0.3	0.528322	0.481481	0.153846	0.314815	0.449081	0.537037	0.44127	0.516667	0.25	0.411765	0.473684	0.909091		0.47403	0.512931	FALSE	FALSE	1300		bin26	0.511111	0.5	0.460317	0.538462	0.363636	0.722222	0.333333	0.35614	0.684211	0.52381	0.624756	0.526316	0.6
bin27	0.763158	0.486111	0.519608	0.333333	0.814815	0.769231	0.733333	0.401961	0.236842	0.296296	0.534211	0.444444	0.439394	0.315789	0.183333	0.3	0.62963	0.444444	0.0512821	0.259259	0.516667	0.490196	0.447222	0.433333	0.25	0.411765	0.454191	0.878788		0.458523	0.702678	FALSE	FALSE	1350		bin27	0.5625	0.5	0.354762	0.576923	0.257576	0.555556	0.206897	0.356725	0.648148	0.338384	0.537037	0.526316	0.566667
bin28	0.66122	0.458333	0.509804	0.384615	0.777778	0.8	0.8	0.456863	0.263158	0.240741	0.466667	0.444444	0.363636	0.356725	0.116667	0.257895	0.62963	0.422658	0.282051	0.185185	0.422807	0.580882	0.4125	0.3	0.25	0.411765	0.350877	0.818182		0.443753	0.480651	FALSE	FALSE	1400		bin28	0.618056	0.541667	0.315789	0.576923	0.227273	0.333333	0.0935961	0.277778	0.537037	0.30303	0.526316	0.438596	0.666667
bin29	0.612745	0.416667	0.588235	0.410256	0.759259	0.769231	0.7	0.4	0.25	0.277778	0.4	0.444444	0.272727	0.368421	0.05	0.22807	0.703704	0.391667	0.358974	0.235294	0.426843	0.6875	0.434722	0.266667	0.25	0.431373	0.22807	0.812121		0.434813	0.414438	FALSE	FALSE	1450		bin29	0.651389	0.543056	0.315632	0.589744	0.151515	0.333333	0.0595238	0.359477	0.5	0.285714	0.561404	0.298246	0.7
bin30	0.488889	0.430556	0.645833	0.512821	0.678649	0.749744	0.751852	0.351371	0.276316	0.405229	0.433333	0.588235	0.272727	0.385965	0.0833333	0.280702	0.759259	0.425	0.538462	0.294118	0.551852	0.699755	0.434722	0.25	0.333333	0.666667	0.210526	0.733333		0.472592	0.14294	FALSE	FALSE	1500		bin30	0.5875	0.625	0.39127	0.730769	0.142857	0.333333	0.04806	0.411765	0.5	0.333333	0.491228	0.315789	0.7
bin31	0.530637	0.458333	0.648581	0.538462	0.541667	0.648333	0.842593	0.575758	0.368421	0.72549	0.345029	0.595861	0.318182	0.462963	0.4	0.368421	0.796296	0.523611	0.538462	0.529412	0.666667	0.705882	0.583333	0.266667	0.472222	0.647059	0.210526	0.652778		0.534344	0.00745206	TURE	FALSE	1550		bin31	0.519608	0.625	0.25	0.705128	0.230159	0.333333	0.0661538	0.411765	0.481481	0.419841	0.473684	0.403509	0.666667
bin32	0.511029	0.569444	0.641026	0.564103	0.596154	0.621667	0.855159	0.666667	0.526316	0.803922	0.314815	0.574074	0.373518	0.567538	0.666667	0.508772	0.796296	0.571429	0.717949	0.754902	0.730769	0.705882	0.674603	0.421053	0.555556	0.583333	0.210526	0.607143		0.596082	8.69737e-05	TURE	TURE	1600		bin32	0.533333	0.5	0.272727	0.474359	0.205556	0.333333	0.113788	0.4375	0.411306	0.559649	0.526316	0.473684	0.563636
bin33	0.530637	0.694444	0.5	0.615385	0.515152	0.562802	0.794444	0.666667	0.713364	0.854167	0.327887	0.588235	0.636364	0.735516	0.75	0.685185	0.698257	0.642857	0.893162	0.796296	0.758547	0.590686	0.794444	0.5	0.583333	0.577778	0.192982	0.666667		0.638045	1.06005e-05	TURE	TURE	1650		bin33	0.664461	0.520833	0.592593	0.407692	0.20609	0	0.0666667	0.456944	0.178363	0.525009	0.421053	0.508772	0.272727
bin34	0.5625	0.603426	0.531145	0.615385	0.387302	0.539065	0.888889	0.563636	0.958333	0.8125	0.470588	0.588235	0.833333	0.805556	0.8	0.809295	0.652877	0.642857	0.972222	0.808279	0.792593	0.5625	0.866667	0.666667	0.638889	0.533333	0.368421	0.811111		0.681629	3.6877e-06	TURE	TURE	1700		bin34	0.704762	0.375	0.698413	0.383333	0.25641	0	0.14693	0.526786	0.215686	0.522222	0.421053	0.526316	0.157576
bin35	0.666667	0.691041	0.547619	0.652681	0.587302	0.542982	1	0.742593	1	0.834127	0.456944	0.588235	0.81241	0.833333	0.833333	0.837607	0.512821	0.642857	0.848485	0.823529	0.869048	0.612745	0.896296	0.777778	0.636364	0.430159	0.444444	0.766667		0.710288	4.1654e-07	TURE	TURE	1750		bin35	0.533333	0.375	0.644444	0.358366	0.371212	0	0.0862471	0.650183	0.381127	0.5	0.421053	0.54386	0.233333
bin36	0.568254	0.727555	0.5	0.7	0.666667	0.479142	1	0.571429	1	0.881313	0.562698	0.588235	0.871429	0.823232	0.85	0.775926	0.560185	0.732601	0.636364	0.793464	0.877778	0.54902	0.925926	0.823529	0.835017	0.44765	0.596491	0.722222		0.716647	1.2531e-06	TURE	TURE	1800		bin36	0.488889	0.391667	0.6	0.233987	0.333333	0.166667	0	0.578788	0.477778	0.537037	0.425754	0.574074	0.233333
bin37	0.594444	0.628571	0.4	0.533333	0.611111	0.488889	1	0.457143	1	0.672727	0.611111	0.60049	0.898246	0.818182	0.949123	0.72619	0.644444	0.92094	0.575758	0.699634	0.527778	0.5	0.85	0.815686	0.884259	0.603175	0.666667	0.666667		0.690877	6.3563e-06	TURE	TURE	1850		bin37	0.47619	0.338462	0.644444	0.16299	0.428571	0.111111	0	0.481481	0.423077	0.566138	0.374755	0.537037	0.347222
bin38	0.794974	0.60039	0.5	0.541667	0.777778	0.515152	NaN	0.716667	1	0.407407	0.627273	0.604167	0.789683	0.892593	0.982456	0.5	0.611111	0.872054	0.515152	0.555556	0	0.522222	1	0.861111	0.785714	0.566667	0.807018	0.888889		0.675396	3.5545e-05	TURE	TURE	1900		bin38	0.502331	0.353535	0.5	0.21978	0.288889	0	0	0.5	0.416667	0.452381	0.433261	0.518519	0.333333
bin39	0.944444	0.696047	0.5	0.396825	0.5	0.530303	NaN	1	1	0.57037	0.625	0.563889	0.774725	0.952381	1	0.533333	0	0.740741	0.5	0.426263	0	0.53663	1	0.966667	0.694444	0.5	0.833333	1		0.658718	0.000122443	TURE	TURE	1950		bin39	0.388889	0.42963	NaN	0.321212	0.35	0	NaN	0.333333	0.454545	0.4	0.347222	0.577342	0.396825
bin40	1	0.733333	0.25	0.333333	0.333333	0.537037	NaN	1	1	0.483333	0.665476	0.613858	0.664646	0.805556	1	0.666667	0	0.809524	0.375	0.583333	NaN	0.5	1	1	0.555556	0.25	0.816176	1		0.652929	0.000101106	TURE	TURE	2000		bin40	0.166667	0.555556	NaN	0.533333	0	0	NaN	0.206349	0.457672	0.277778	0.4	0.60049	0.333333
bin41	1	0.634921	0.25	0.333333	0	0.802381	NaN	1	1	0	0.783333	0.656566	0.579365	1	1	0.222222	NaN	0.609524	0.458333	0.625	NaN	0.638047	NaN	1	0.5	0.388889	0.8125	1		0.637267	0.00796805	TURE	FALSE	2050		bin41	0	0.52381	NaN	0.672222	0	0.111111	NaN	0	0.333333	0.5	0.3	0.563889	0.194444
bin42	0.777778	0.634921	0.333333	0.388889	NaN	0.933333	NaN	1	1	0	0.416667	0.633333	0.666667	1	1	0	NaN	0.266667	0.785714	0.666667	NaN	0.62963	NaN	1	1	0.666667	0.879121	NaN		0.667245	0.00544836	TURE	FALSE	2100		bin42	0	0.571429	NaN	0.672222	0	0.5	NaN	0.166667	0.277778	0	0.3	0.538462	0.361111
bin43	0.333333	0.533333	0.388889	0.5	NaN	0.833333	NaN	1	1	0	0	0.603175	1	1	1	0	NaN	0	0.833333	0.783333	NaN	0.654762	NaN	1	1	0.555556	0.914141	NaN		0.633327	0.00430499	TURE	FALSE	2150		bin43	0.333333	0.603175	NaN	0.666667	0	0.166667	NaN	0.444444	0.244444	0	0.0833333	0.388889	0.5
bin44	0	0	0.833333	0.833333	NaN	0.75	NaN	0.666667	1	0	0	0.666667	1	1	1	NaN	NaN	0	0.711111	0.222222	NaN	0.8	NaN	NaN	1	0.333333	0.936364	NaN		0.587652	0.366426	FALSE	FALSE	2200		bin44	0.388889	0.722222	NaN	1	0	1	NaN	1	0	0	0	0.111111	1
bin45	0	0	1	1	NaN	0.75	NaN	0	1	NaN	0	0.771429	NaN	0.833333	1	NaN	NaN	0	0.222222	0	NaN	0.733333	NaN	NaN	1	1	1	NaN		0.572795	0.4714	FALSE	FALSE	2250		bin45	0.333333	0.666667	NaN	1	0	NaN	NaN	0.5	0	NaN	NaN	0	0
bin46	NaN	NaN	0.333333	NaN	NaN	0.833333	NaN	NaN	NaN	NaN	NaN	1	NaN	0.5	1	NaN	NaN	0	0	0	NaN	0.533333	NaN	NaN	1	1	1	NaN		0.6	0.294004	FALSE	FALSE	2300		bin46	0.5	0.444444	NaN	1	0	NaN	NaN	1	0	NaN	NaN	0	0
bin47	NaN	NaN	0	NaN	NaN	1	NaN	NaN	NaN	NaN	NaN	0.666667	NaN	0.5	1	NaN	NaN	0	0	0	NaN	0.355556	NaN	NaN	1	NaN	0.944444	NaN		0.49697	0.346485	FALSE	FALSE	2350		bin47	0.5	0.333333	NaN	1	NaN	NaN	NaN	1	0	NaN	NaN	0	NaN
bin48	NaN	NaN	NaN	NaN	NaN	1	NaN	NaN	NaN	NaN	NaN	0.5	NaN	NaN	1	NaN	NaN	0	NaN	0	NaN	0.333333	NaN	NaN	NaN	NaN	0.766667	NaN		0.514286	0.146699	FALSE	FALSE	2400		bin48	0.333333	1	NaN	NaN	NaN	NaN	NaN	NaN	0	NaN	NaN	0	NaN
bin49	NaN	NaN	0	NaN	NaN	NaN	NaN	NaN	NaN	NaN	NaN	0.333333	NaN	NaN	NaN	NaN	NaN	1	NaN	1	NaN	0.444444	NaN	NaN	NaN	NaN	0.777778	NaN		0.592593	0.044363	TURE	FALSE	2450		bin49	0	NaN	NaN	NaN	NaN	NaN	NaN	NaN	NaN	NaN	NaN	NaN	NaN
bin50	NaN	NaN	0	NaN	NaN	NaN	NaN	NaN	NaN	NaN	NaN	0	NaN	NaN	NaN	NaN	NaN	NaN	NaN	1	NaN	1	NaN	NaN	NaN	NaN	1	NaN		0.6	#DIV/0!	#DIV/0!	#DIV/0!	2500		bin50	NaN	NaN	NaN	NaN	NaN	NaN	NaN	NaN	NaN	NaN	NaN	NaN	NaN
AVE																																				AVE
DL DIS																																				DL DIS
CUED	S13	S14	S15	S16	S17	S18	S19	S20	S21	S22	S23	S24	S25	S26	S27	S28	S29	S31	S32	S33	S34	S35	S36	S37	S38	S39	S40	S41		AVE	T-test			time (ms)		UNCUED	S13	S14	S15	S16	S17	S18	S19	S20	S21	S22	S23	S24	S25
bin1	0.720635	0.375	0.462963	0.368421	0.5	0.484848	0.615385	0.642857	0.318841	0.488889	0.529412	0.479167	0.4	0.545455	0.5	0.428571	0.425926	0.490196	0.4375	0.529412	0.507937	0.533333	0.357143	0.565217	0.428571	0.37037	0.4	0.75		0.487716	0.266696	FALSE	FALSE	50		bin1	0.380014	0.571429	0.434783	0.619048	0.636364	0.346154	0.444444	0.555556	0.869658	0.546667	0.492063	0.555556	0.411765
bin2	0.720635	0.352941	0.5	0.421053	0.555556	0.545455	0.615385	0.642857	0.309783	0.533333	0.529412	0.479167	0.4	0.530303	0.566667	0.428571	0.462963	0.470588	0.4375	0.529412	0.409091	0.511111	0.357143	0.521739	0.428571	0.388889	0.409524	0.75		0.49313	0.448487	FALSE	FALSE	100		bin2	0.360317	0.539683	0.375435	0.619048	0.636364	0.371795	0.444444	0.571429	0.897436	0.56	0.507937	0.521135	0.411765
bin3	0.690476	0.392157	0.5	0.385965	0.555556	0.545455	0.615385	0.642857	0.333333	0.6	0.529412	0.5	0.4	0.5	0.6	0.461538	0.5	0.470588	0.4375	0.529412	0.409091	0.422222	0.357143	0.521739	0.404762	0.388889	0.428571	0.722222		0.494438	0.466426	FALSE	FALSE	150		bin3	0.362963	0.555556	0.37641	0.619048	0.681818	0.346154	0.444444	0.587302	0.928571	0.56	0.523088	0.521739	0.411765
bin4	0.650794	0.411765	0.392593	0.368421	0.555556	0.545455	0.615385	0.595238	0.361111	0.6	0.588235	0.479167	0.4	0.492063	0.6	0.461538	0.5	0.480392	0.4375	0.529412	0.396825	0.4	0.357143	0.492754	0.357143	0.388889	0.460317	0.666667		0.485156	0.285821	FALSE	FALSE	200		bin4	0.338889	0.492063	0.379444	0.619048	0.636364	0.371795	0.444444	0.571429	0.928571	0.56	0.52381	0.583333	0.411765
bin5	0.714286	0.411765	0.42963	0.368421	0.592593	0.636364	0.615385	0.571429	0.333333	0.6	0.568627	0.479167	0.4	0.469697	0.833333	0.461538	0.537037	0.604167	0.4375	0.529412	0.366667	0.4	0.380952	0.536232	0.404762	0.351852	0.460317	0.75		0.508731	0.243791	FALSE	FALSE	250		bin5	0.333333	0.45873	0.447895	0.650794	0.636364	0.397436	0.469136	0.560606	0.928571	0.56	0.52381	0.597222	0.411765
bin6	0.714286	0.431373	0.555556	0.368421	0.703704	0.69697	0.615385	0.571429	0.375	0.6	0.588235	0.75	0.4	0.454545	0.9	0.461538	0.574074	0.8125	0.5	0.54902	0.333333	0.4	0.428571	0.695652	0.47619	0.333333	0.428571	0.861111		0.556386	0.238321	FALSE	FALSE	300		bin6	0.338889	0.45873	0.571429	0.68254	0.708514	0.525641	0.518519	0.590909	0.97619	0.573333	0.539683	0.708333	0.411765
bin7	0.78022	0.411765	0.730159	0.368421	0.925926	0.757576	0.641026	0.55873	0.444444	0.6	0.588235	0.791667	0.4	0.621212	0.9	0.595238	0.62963	0.979167	0.604167	0.647059	0.418254	0.377778	0.428571	0.811594	0.5	0.351852	0.396825	1		0.616411	0.343774	FALSE	FALSE	350		bin7	0.362281	0.47619	0.671717	0.714286	0.878788	0.628205	0.54321	0.651515	0.952381	0.64	0.571429	0.763889	0.431373
bin8	0.78022	0.45098	0.921296	0.385965	0.944444	0.818182	0.692308	0.511111	0.492754	0.690476	0.588235	0.979167	0.366667	0.69697	1	0.666667	0.666667	1	0.6875	0.705882	0.484127	0.333333	0.357143	0.927536	0.547619	0.388889	0.412698	1		0.660601	0.236141	FALSE	FALSE	400		bin8	0.315789	0.539683	0.787879	0.730159	1	0.692308	0.604938	0.681818	0.928571	0.68	0.555556	0.888889	0.470588
bin9	0.78022	0.529412	1	0.421053	0.944444	0.818182	0.692308	0.52381	0.608696	0.714286	0.647059	1	0.3	0.772727	1	0.738095	0.62963	1	0.833333	0.745098	0.476912	0.377778	0.357143	0.956522	0.571429	0.425926	0.428571	1		0.689023	0.249593	FALSE	FALSE	450		bin9	0.315789	0.539683	0.86693	0.714286	1	0.692308	0.692308	0.727273	0.928571	0.693333	0.52381	0.958333	0.470588
bin10	0.77208	0.547386	1	0.401914	0.925926	0.767677	0.711538	0.566138	0.601876	0.698413	0.720588	1	0.30202	0.792208	1	0.859127	0.577441	1	1	0.761312	0.47218	0.498413	0.419048	0.941856	0.654864	0.4439	0.336508	1		0.706158	0.355639	FALSE	FALSE	500		bin10	0.330383	0.557937	0.940711	0.718615	1	0.680264	0.662564	0.829275	0.950549	0.685128	0.488095	0.986111	0.466264
bin11	0.759091	0.447059	1	0.447368	0.959259	0.878788	0.665113	0.592186	0.637963	0.641636	0.680333	1	0.294444	0.806061	1	0.821429	0.752723	0.97619	1	0.785061	0.416541	0.423413	0.365079	0.942029	0.595238	0.590278	0.421181	1		0.710659	0.232535	FALSE	FALSE	550		bin11	0.436508	0.444444	0.894824	0.709524	1	0.699368	0.715214	0.802552	0.85641	0.748282	0.562163	1	0.479085
bin12	0.765152	0.470588	1	0.421053	0.944444	0.727273	0.692308	0.571429	0.594203	0.642857	0.647059	1	0.3	0.818182	1	0.857143	0.611111	0.928571	1	0.764706	0.380952	0.422222	0.428571	0.884058	0.642857	0.611111	0.380952	1		0.696672	0.0925873	FALSE	FALSE	600		bin12	0.409524	0.52381	0.957729	0.714286	1	0.679487	0.730769	0.80303	0.846154	0.733333	0.52381	1	0.470588
bin13	0.785548	0.470588	1	0.45614	0.981481	0.727273	0.615385	0.571429	0.536232	0.642857	0.647059	1	0.321212	0.818182	1	0.738095	0.648148	0.904762	1	0.764706	0.369408	0.333333	0.384615	0.826087	0.619048	0.648148	0.380952	1		0.685382	0.0742683	FALSE	FALSE	650		bin13	0.423559	0.492063	0.943792	0.698413	1	0.692308	0.730769	0.772727	0.846154	0.746667	0.52381	1	0.470588
bin14	0.794872	0.392157	0.972222	0.473684	1	0.727273	0.615385	0.571429	0.478261	0.615385	0.647059	1	0.366667	0.818182	1	0.642857	0.648148	0.849817	1	0.823529	0.444444	0.355556	0.384615	0.782609	0.619048	0.611111	0.380952	1		0.679116	0.302	FALSE	FALSE	700		bin14	0.4	0.444444	0.940711	0.666667	1	0.692308	0.692308	0.712121	0.769231	0.72	0.546176	1	0.470588
bin15	0.837607	0.367647	0.916667	0.473684	1	0.636364	0.615385	0.571429	0.42029	0.615385	0.647059	1	0.4	0.772727	1	0.619048	0.62963	0.769231	0.955556	0.823529	0.396825	0.4	0.361111	0.782609	0.571429	0.611111	0.396825	1		0.663969	0.269842	FALSE	FALSE	750		bin15	0.4	0.380952	0.926219	0.666667	0.984848	0.692308	0.666667	0.69697	0.74359	0.72	0.484127	1	0.470588
bin16	0.784188	0.375	0.853535	0.473684	0.962963	0.609428	0.615385	0.571429	0.449275	0.615385	0.647059	1	0.366667	0.772727	0.866667	0.52381	0.603486	0.615385	0.733333	0.823529	0.428571	0.4	0.363636	0.565217	0.52381	0.574074	0.428571	0.916667		0.623696	0.226887	FALSE	FALSE	800		bin16	0.393651	0.380952	0.895257	0.650794	0.984848	0.666667	0.564103	0.621212	0.615385	0.72	0.5	1	0.509804
bin17	0.762759	0.3125	0.739394	0.438596	1	0.481481	0.615385	0.452381	0.362319	0.615385	0.627451	1	0.387879	0.742424	0.733333	0.333333	0.54902	0.358974	0.355556	0.764706	0.380952	0.444444	0.393939	0.478261	0.5	0.518519	0.444444	0.833333		0.558099	0.216661	FALSE	FALSE	850		bin17	0.372598	0.380952	0.756643	0.587302	0.969697	0.649231	0.551282	0.545455	0.538462	0.661667	0.492063	1	0.509804
bin18	0.860317	0.3125	0.766667	0.421053	0.944444	0.518519	0.615385	0.428571	0.376812	0.549145	0.560049	1	0.436364	0.606061	0.766667	0.450549	0.607843	0.410256	0.266667	0.72549	0.444444	0.488889	0.47619	0.463768	0.452381	0.462963	0.47619	0.805556		0.560491	0.97875	FALSE	FALSE	900		bin18	0.375244	0.380952	0.652947	0.603175	0.939394	0.586667	0.538462	0.454545	0.538462	0.625	0.45873	0.956522	0.39951
bin19	0.795238	0.3125	0.7	0.421053	0.888889	0.555556	0.615385	0.357143	0.333333	0.333333	0.5625	0.9375	0.424242	0.560606	0.7	0.384615	0.607843	0.461538	0.266667	0.666667	0.428571	0.511111	0.357143	0.478261	0.404762	0.444444	0.396825	0.833333		0.526395	0.983588	FALSE	FALSE	950		bin19	0.421053	0.380952	0.549517	0.539683	0.893218	0.533333	0.488129	0.439394	0.594017	0.597222	0.47619	0.913043	0.3125
bin20	0.785714	0.3125	0.633333	0.421053	0.796296	0.62963	0.615385	0.214286	0.347826	0.333333	0.5625	0.770833	0.367521	0.545455	0.4	0.333333	0.54902	0.43956	0.266667	0.588235	0.52381	0.466667	0.357143	0.449275	0.309524	0.37037	0.380952	0.75		0.482865	0.496046	FALSE	FALSE	1000		bin20	0.448246	0.396825	0.472222	0.571429	0.833333	0.52	0.444444	0.393939	0.692308	0.583333	0.47619	0.73913	0.395833
bin21	0.796537	0.346814	0.718519	0.397232	0.74951	0.672222	0.611111	0.233333	0.345029	0.294444	0.552778	0.625	0.42094	0.483333	0.5	0.21685	0.509804	0.296703	0.32037	0.643697	0.639098	0.501587	0.330159	0.44775	0.297802	0.31746	0.359178	0.777778		0.478751	0.570031	FALSE	FALSE	1050		bin21	0.466667	0.380952	0.527939	0.576794	0.736874	0.583821	0.44332	0.37963	0.736111	0.554094	0.52381	0.612846	0.4375
bin22	0.732809	0.405483	0.551852	0.421053	0.780093	0.666667	0.594017	0.199634	0.391304	0.316239	0.580628	0.511111	0.347282	0.5	0.4	0.254762	0.485348	0.428571	0.227717	0.540523	0.697436	0.462121	0.319014	0.425091	0.253487	0.358364	0.420966	0.759259		0.465387	0.553415	FALSE	FALSE	1100		bin22	0.494841	0.356052	0.551415	0.571429	0.666667	0.51942	0.454359	0.338384	0.661538	0.591787	0.511111	0.483333	0.454545
bin23	0.793956	0.361111	0.5	0.421053	0.740741	0.666667	0.615385	0.120879	0.405797	0.307692	0.588235	0.5	0.333333	0.5	0.4	0.204762	0.470588	0.5	0.244444	0.568627	0.655556	0.466667	0.307692	0.500659	0.31685	0.368627	0.370635	0.75		0.46357	0.662723	FALSE	FALSE	1150		bin23	0.498635	0.393651	0.582345	0.539683	0.671717	0.486111	0.444444	0.318182	0.692308	0.569444	0.52381	0.478261	0.470588
bin24	0.838095	0.355159	0.5	0.421053	0.722222	0.740741	0.615385	0.190476	0.391304	0.285714	0.529412	0.5	0.305556	0.545455	0.333333	0.266667	0.509804	0.533333	0.244444	0.529412	0.666667	0.466667	0.307692	0.492754	0.357143	0.352941	0.370635	0.722222		0.467653	0.974003	FALSE	FALSE	1200		bin24	0.465789	0.393651	0.562771	0.52381	0.634921	0.472222	0.444444	0.328283	0.692308	0.5	0.52381	0.478261	0.470588
bin25	0.770833	0.333333	0.5	0.421053	0.703704	0.7	0.615385	0.190476	0.333333	0.285714	0.470588	0.5	0.416667	0.545455	0.3	0.266667	0.580882	0.533333	0.2	0.529412	0.581871	0.466667	0.340659	0.463768	0.404762	0.352941	0.380952	0.638889		0.458119	0.893836	FALSE	FALSE	1250		bin25	0.457895	0.380952	0.561359	0.52381	0.619048	0.513889	0.432099	0.318182	0.666667	0.541667	0.47619	0.478261	0.470588
bin26	0.75	0.361111	0.398148	0.385965	0.574074	0.7	0.615385	0.142857	0.347826	0.285714	0.490196	0.5	0.285354	0.499278	0.266667	0.266667	0.625	0.431373	0.2	0.490196	0.555556	0.488889	0.357143	0.42029	0.428571	0.352941	0.365079	0.611111		0.43555	0.801797	FALSE	FALSE	1300		bin26	0.473684	0.380952	0.47942	0.47619	0.571429	0.569444	0.345679	0.287879	0.615385	0.430556	0.444444	0.485507	0.470588
bin27	0.6875	0.416667	0.291667	0.368421	0.574074	0.806061	0.564103	0.214286	0.396574	0.285714	0.411765	0.5	0.138889	0.492063	0.133333	0.288889	0.588235	0.453159	0.2	0.333333	0.555556	0.547619	0.357143	0.202899	0.404762	0.333333	0.349206	0.805556		0.417886	0.858171	FALSE	FALSE	1350		bin27	0.592982	0.380952	0.430556	0.492063	0.539683	0.513889	0.197531	0.354257	0.589744	0.347222	0.383333	0.5	0.411765
bin28	0.511111	0.479167	0.476852	0.368421	0.722222	0.818182	0.615385	0.404762	0.333333	0.285714	0.352941	0.479167	0.222222	0.619048	0.2	0.177778	0.588235	0.491228	0.511111	0.352941	0.605664	0.604762	0.396825	0.0869565	0.357143	0.294118	0.396825	0.833333		0.44948	0.393519	FALSE	FALSE	1400		bin28	0.666667	0.396825	0.36	0.47619	0.454545	0.453333	0.148148	0.380952	0.538462	0.305556	0.55	0.430556	0.313725
bin29	0.348214	0.529412	0.505952	0.368421	0.722222	0.757576	0.615385	0.452381	0.308959	0.285714	0.352941	0.270833	0.361111	0.587302	0.3	0.2	0.686275	0.578947	0.622222	0.352941	0.5	0.6	0.512821	0.0869565	0.333333	0.27451	0.380952	0.833333		0.454597	0.280096	FALSE	FALSE	1450		bin29	0.709552	0.459524	0.298899	0.52381	0.424242	0.452222	0.148148	0.383333	0.538462	0.333333	0.55	0.333333	0.27451
bin30	0.367647	0.529412	0.611111	0.385965	0.722222	0.727273	0.692308	0.5	0.289855	0.333333	0.392157	0.145833	0.469697	0.613492	0.333333	0.204762	0.843137	0.557734	0.711111	0.392157	0.432456	0.6	0.407407	0.101449	0.333333	0.490196	0.428571	0.75		0.477355	0.0976696	FALSE	FALSE	1500		bin30	0.727096	0.492063	0.333333	0.555556	0.322727	0.422705	0.155897	0.35	0.435897	0.361111	0.55	0.361111	0.27451
bin31	0.331349	0.490196	0.666667	0.526316	0.764706	0.709091	0.769231	0.654762	0.318841	0.309524	0.568627	0.5	0.533333	0.603486	0.533333	0.357143	0.901961	0.686275	0.711111	0.568627	0.35	0.577778	0.476852	0.217391	0.357143	0.588235	0.396825	0.725758		0.542663	0.0117926	TURE	FALSE	1550		bin31	0.703704	0.603175	0.306373	0.444444	0.366885	0.463768	0.156759	0.416667	0.461538	0.444444	0.516667	0.541667	0.306373
bin32	0.311111	0.45098	0.638889	0.526316	0.688889	0.688889	0.865385	0.75	0.407609	0.452381	0.705882	0.5	0.566667	0.640931	0.7	0.595238	0.921569	0.620098	0.755556	0.607843	0.416122	0.488889	0.309524	0.376812	0.43956	0.633578	0.380952	0.677778		0.575623	0.00840199	TURE	FALSE	1600		bin32	0.722222	0.730159	0.425	0.475397	0.235294	0.405797	0.0334169	0.47037	0.538462	0.583333	0.466667	0.5	0.37598
bin33	0.375	0.470588	0.611111	0.649123	0.711111	0.481481	0.9	0.742424	0.5	0.547619	0.843137	0.5	0.533333	0.645833	0.8	0.711538	0.9125	0.555556	0.8	0.803922	0.569989	0.444444	0.547619	0.695652	0.461538	0.744444	0.380952	0.654762		0.628346	0.000225092	TURE	TURE	1650		bin33	0.476852	0.52381	0.488889	0.5	0.196078	0.362319	0	0.608333	0.512821	0.661836	0.428571	0.5	0.377778
bin34	0.291667	0.520833	0.694444	0.631579	0.509402	0.407407	0.962963	0.636364	0.708333	0.711538	0.72549	0.541667	0.633333	0.738889	0.9	0.874074	0.8	0.522222	0.711111	0.823529	0.735516	0.466667	0.5	0.782609	0.461538	0.769231	0.492063	0.830159		0.656522	7.80981e-05	TURE	TURE	1700		bin34	0.423413	0.47619	0.551782	0.47271	0.139683	0.269151	0	0.660317	0.542929	0.603175	0.387302	0.5	0.326984
bin35	0.517628	0.666667	0.666667	0.643275	0.513889	0.259259	1	0.606061	0.729469	0.75	0.686683	0.541667	0.6	0.719658	0.9	0.805556	0.719658	0.428571	0.533333	0.75	0.757576	0.466667	0.533333	0.913043	0.446581	0.769231	0.588889	0.722222		0.651271	3.72731e-05	TURE	TURE	1750		bin35	0.420343	0.428571	0.5	0.444444	0.123016	0.269841	0.111111	0.769231	0.481481	0.47271	0.418129	0.5	0.410256
bin36	0.775758	0.531944	0	0.647059	0.657143	0.37037	1	0.560185	0.7	0.796296	0.697436	0.583333	0.426263	0.649573	0.792593	0.698413	0.611111	0.487179	0.339683	0.75	0.714646	0.466667	0.416667	0.913043	0.385101	0.801865	0.666667	0.777778		0.614885	0.00421781	TURE	FALSE	1800		bin36	0.466346	0.414035	0.575661	0.376906	0.0606061	0.305263	0.0666667	0.733333	0.481481	0.480876	0.346814	0.5	0.42094
bin37	0.888889	0.619048	0	0.740278	0.766667	0.361111	1	0.580952	0.709368	0.87963	0.634343	0.666667	0.434524	0.69798	0.777778	0.611111	0.466667	0.461538	0.309524	0.714286	0.654762	0.511111	0.5	0.911726	0.603175	0.731313	0.642593	1		0.638394	0.0193756	TURE	FALSE	1850		bin37	0.388889	0.463938	0.611111	0.256209	0	0.314815	0	0.725926	0.619048	0.484848	0.259722	0.472222	0.583333
bin38	0.836111	0.595238	0	0.761905	0.75	0.291667	1	0.5	0.677198	0.849206	0.768519	0.5625	0.410714	0.7	0.777778	0.6	0	0.555556	0.357143	0.594017	0.327778	0.614286	0.666667	0.938672	0.611111	0.533333	0.640931	1		0.604297	0.11629	FALSE	FALSE	1900		bin38	0.39436	0.339869	0.555556	0.304945	0	0.379902	NaN	0.666667	0.466667	0.42963	0.193085	0.333333	0.583333
bin39	0.811111	0.571429	0	0.760739	0.583333	0.291667	1	0.888889	0.706527	0.8	0.904762	0.563889	0.587302	0.8	0.814815	0.8	0.333333	0.588384	0.340659	0.542929	1	0.695416	1	0.92963	0.388889	0.166667	0.701389	1		0.663277	0.00490718	TURE	FALSE	1950		bin39	0.428571	0.377778	0.833333	0.184848	0	0.511111	NaN	0.537037	0.266667	0.333333	0.324242	0.286957	0.538462
bin40	0.783333	0.52381	0	0.6	0.5	0.150794	1	1	0.675	0.766667	1	0.466667	0.833333	0.810185	0.863095	0.933333	1	0.570707	0.367521	0.585185	1	0.709091	1	0.93436	0.333333	0	0.791126	1		0.685626	0.000617761	TURE	TURE	2000		bin40	0.333333	0.239057	0.666667	0.261905	0.333333	0.392857	NaN	0.357143	0.233333	0.355556	0.243386	0.28655	0.518519
bin41	0.916667	0.598485	0	0.285714	0.333333	0	1	1	0.625	0.916667	1	0.428571	0.8	0.869048	0.838095	1	1	0.459596	0.529545	0.555556	1	0.6	1	0.906061	0.333333	NaN	0.772727	1		0.695126	0.00872991	TURE	FALSE	2050		bin41	0.333333	0.263889	1	0.257143	0	0.530303	NaN	0.169841	0.277778	0.355556	0.246032	0.39046	0.532143
bin42	1	0.575	NaN	0.0952381	1	0	NaN	NaN	0.565476	1	1	0.538462	1	0.822222	0.722222	1	1	0.25	0.75	0.888889	1	0.585185	1	0.877381	0.833333	NaN	0.783333	1		0.761948	0.0033685	TURE	FALSE	2100		bin42	1	0.355556	1	0.222222	NaN	0.533333	NaN	0.244444	0.555556	0.444444	0.444444	0.446387	0.466667
bin43	0.333333	0.25	NaN	0	1	0.333333	NaN	NaN	0.566667	1	1	0.403846	1	1	0.611111	NaN	1	0.238095	0.849206	1	1	0.494709	1	0.933333	1	NaN	0.703704	1		0.726841	0.0133312	TURE	FALSE	2150		bin43	NaN	0.466667	NaN	0.444444	NaN	0.428571	NaN	0	0.555556	0.444444	0.5	0.518519	0.166667
bin44	0	0.305556	NaN	0	1	0.5	NaN	NaN	0.783333	NaN	NaN	0.472222	1	1	0.5	NaN	NaN	0.420635	1	1	NaN	0.47619	NaN	1	NaN	NaN	0.644444	1		0.653081	0.0131691	TURE	FALSE	2200		bin44	NaN	0.5	NaN	0.5	NaN	0.289683	NaN	0	0.5	0.666667	0	0.37037	0
bin45	0	0.666667	NaN	NaN	1	0.5	NaN	NaN	1	NaN	NaN	0.685185	0.888889	1	0.666667	NaN	NaN	0.466667	1	1	NaN	0.555556	NaN	1	NaN	NaN	0.694444	NaN		0.741605	0.0167067	TURE	FALSE	2250		bin45	NaN	0.666667	NaN	0.5	NaN	0.444444	NaN	1	0.666667	1	0	0.2	NaN
bin46	0	NaN	NaN	NaN	NaN	0.166667	NaN	NaN	1	NaN	NaN	1	0.777778	1	1	NaN	NaN	0.388889	1	1	NaN	1	NaN	1	NaN	NaN	0.5	NaN		0.75641	0.117603	FALSE	FALSE	2300		bin46	NaN	0.555556	NaN	0.166667	NaN	0.555556	NaN	NaN	NaN	1	0	0.15	NaN
bin47	0	NaN	NaN	NaN	NaN	0	NaN	NaN	NaN	NaN	NaN	1	0.833333	0.666667	NaN	NaN	NaN	0.111111	NaN	1	NaN	NaN	NaN	1	NaN	NaN	0.833333	NaN		0.604938	0.221495	FALSE	FALSE	2350		bin47	NaN	0	NaN	0	NaN	0.5	NaN	NaN	NaN	1	NaN	0	NaN
bin48	0	NaN	NaN	NaN	NaN	0	NaN	NaN	NaN	NaN	NaN	1	0.666667	0	NaN	NaN	NaN	0	NaN	1	NaN	NaN	NaN	1	NaN	NaN	1	NaN		0.518519	0.241166	FALSE	FALSE	2400		bin48	NaN	1	NaN	NaN	NaN	0.166667	NaN	NaN	NaN	1	NaN	0	NaN
bin49	0	NaN	NaN	NaN	NaN	0	NaN	NaN	NaN	NaN	NaN	NaN	1	NaN	NaN	NaN	NaN	NaN	NaN	1	NaN	NaN	NaN	1	NaN	NaN	1	NaN		0.666667	0.5	FALSE	FALSE	2450		bin49	NaN	1	NaN	NaN	NaN	0	NaN	NaN	NaN	0.5	NaN	0	NaN
bin50	0	NaN	NaN	NaN	NaN	NaN	NaN	NaN	NaN	NaN	NaN	NaN	1	NaN	NaN	NaN	NaN	NaN	NaN	1	NaN	NaN	NaN	1	NaN	NaN	NaN	NaN		0.75	#DIV/0!	#DIV/0!	#DIV/0!	2500		bin50	NaN	1	NaN	NaN	NaN	NaN	NaN	NaN	NaN	NaN	NaN	0	NaN
AVE																																				AVE
[truncated: 16 more columns]

## Sheet: FACE_Self-paced
SP																																				SP
CUED	S13	S14	S15	S16	S17	S18	S19	S20	S21	S22	S23	S24	S25	S26	S27	S28	S29	S31	S32	S33	S34	S35	S36	S37	S38	S39	S40	S41		AVE	T-test		bonferroni	time (ms)		UNCUED	S13	S14	S15	S16	S17	S18	S19	S20	S21	S22	S23	S24	S25
																																	p<0.05/50
bin1	0.644946	0.517241	0.529101	0.582278	0.445887	0.493827	0.53125	0.508772	0.504167	0.477273	0.320988	0.5	0.440171	0.473896	0.604444	0.384615	0.487562	0.542675	0.583333	0.506024	0.42735	0.563786	0.390351	0.457364	0.514219	0.473958	0.53876	0.494792		0.497823	0.72791	FALSE	FALSE	50		bin1	0.478865	0.478873	0.52214	0.45679	0.493827	0.489064	0.477778	0.515152	0.532468	0.514286	0.614035	0.466667	0.546995
bin2	0.685001	0.517241	0.544974	0.56962	0.454545	0.493827	0.53125	0.458874	0.495833	0.481061	0.330607	0.497657	0.457265	0.457831	0.598198	0.384615	0.492537	0.561529	0.575397	0.506024	0.411866	0.563786	0.373333	0.44186	0.530718	0.476923	0.532834	0.515625		0.497887	0.690507	FALSE	FALSE	100		bin2	0.452769	0.478873	0.506024	0.440329	0.495935	0.482627	0.477778	0.538462	0.508547	0.514286	0.59731	0.486275	0.55
bin3	0.692331	0.517241	0.560847	0.56962	0.462632	0.493827	0.53125	0.445887	0.493776	0.481061	0.352623	0.507246	0.465812	0.461847	0.600901	0.384615	0.502488	0.56682	0.559524	0.506024	0.38961	0.563786	0.380468	0.449612	0.497653	0.461538	0.54023	0.557292		0.499877	0.665711	FALSE	FALSE	150		bin3	0.452495	0.481481	0.509897	0.440329	0.487805	0.478466	0.477778	0.54399	0.497836	0.514286	0.591111	0.466667	0.55
bin4	0.731307	0.522727	0.585083	0.56962	0.48	0.510288	0.53125	0.452153	0.491667	0.492424	0.380195	0.542857	0.448718	0.453815	0.608108	0.38628	0.507463	0.565394	0.559524	0.506024	0.372294	0.572016	0.386713	0.46124	0.483698	0.448951	0.549242	0.564824		0.505853	0.446152	FALSE	FALSE	200		bin4	0.477612	0.472222	0.516016	0.444444	0.47561	0.478632	0.477778	0.5	0.495726	0.514286	0.578947	0.443137	0.561111
bin5	0.731481	0.534091	0.652004	0.561181	0.469006	0.530864	0.53125	0.444444	0.516667	0.503788	0.384311	0.559903	0.444444	0.445783	0.704862	0.392219	0.505051	0.668733	0.571429	0.506024	0.400866	0.567901	0.42646	0.537255	0.479069	0.452736	0.573544	0.661538		0.527032	0.402594	FALSE	FALSE	250		bin5	0.439988	0.481351	0.589596	0.465021	0.47561	0.510549	0.481481	0.494792	0.521368	0.511939	0.590292	0.40943	0.561111
bin6	0.70487	0.545455	0.644444	0.580602	0.526316	0.604938	0.604167	0.488889	0.541667	0.549242	0.3875	0.647343	0.440171	0.441767	0.822843	0.384615	0.545455	0.814815	0.595238	0.506024	0.418983	0.555556	0.454147	0.6	0.530516	0.4951	0.615126	0.876923		0.568668	0.665902	FALSE	FALSE	300		bin6	0.440936	0.502347	0.617482	0.510288	0.577236	0.57384	0.518519	0.520833	0.548902	0.521739	0.578947	0.453815	0.58561
bin7	0.675895	0.574851	0.724859	0.600844	0.776584	0.621399	0.625	0.544094	0.568364	0.621212	0.371914	0.710145	0.463702	0.45166	0.863569	0.392405	0.545455	0.871154	0.698413	0.51004	0.48707	0.559671	0.509062	0.666667	0.654326	0.626263	0.651685	0.969308		0.619129	0.483798	FALSE	FALSE	350		bin7	0.448535	0.520866	0.659944	0.55144	0.795732	0.582278	0.562963	0.494792	0.57384	0.57971	0.579649	0.506024	0.59098
bin8	0.694171	0.599225	0.811514	0.65368	0.960234	0.646091	0.625	0.570175	0.641975	0.666667	0.382716	0.706694	0.518987	0.487705	0.869369	0.43038	0.54359	0.883103	0.84127	0.542169	0.47807	0.547325	0.552637	0.752941	0.786653	0.804407	0.659176	1		0.666283	0.581137	FALSE	FALSE	400		bin8	0.471493	0.550926	0.823577	0.600823	0.962963	0.582278	0.6	0.536458	0.587255	0.637681	0.591111	0.554217	0.614943
bin9	0.704017	0.617749	0.894715	0.698191	1	0.662551	0.625	0.589542	0.720165	0.708333	0.4	0.728571	0.506329	0.495935	0.904973	0.447257	0.589744	0.886783	0.884921	0.586345	0.473684	0.539095	0.559596	0.737255	0.826291	0.904762	0.681648	1		0.691909	0.707417	FALSE	FALSE	450		bin9	0.480745	0.579356	0.873482	0.625514	0.987654	0.594937	0.611111	0.541667	0.632479	0.729469	0.60991	0.626984	0.591954
bin10	0.707949	0.62154	0.906114	0.723788	1	0.653663	0.634227	0.620685	0.759734	0.781275	0.391767	0.685821	0.479888	0.482195	0.903393	0.46525	0.602772	0.869107	0.894367	0.649388	0.454613	0.510207	0.594397	0.698956	0.867554	0.93087	0.686319	1		0.699137	0.802399	FALSE	FALSE	500		bin10	0.480605	0.61647	0.848335	0.659687	0.991665	0.585336	0.601061	0.557788	0.660839	0.789347	0.650556	0.628377	0.591827
bin11	0.652885	0.647062	0.877945	0.718512	1	0.656974	0.603996	0.598455	0.752773	0.763745	0.425521	0.690132	0.524154	0.450102	0.921054	0.454301	0.651015	0.874053	0.889571	0.575653	0.455312	0.539365	0.607532	0.681704	0.921717	0.965759	0.684968	1		0.699438	0.584833	FALSE	FALSE	550		bin11	0.493138	0.62464	0.878664	0.705805	0.9814	0.599573	0.653836	0.603819	0.699288	0.785252	0.645267	0.613016	0.629031
bin12	0.671802	0.646378	0.905806	0.724109	1	0.641975	0.604167	0.622807	0.764455	0.784091	0.429825	0.685714	0.49789	0.46557	0.91027	0.472574	0.641026	0.825871	0.892857	0.618474	0.45807	0.477366	0.603567	0.635659	0.920244	0.984042	0.655431	1		0.697858	0.68721	FALSE	FALSE	600		bin12	0.497653	0.625	0.901636	0.695473	1	0.594937	0.607407	0.592609	0.700422	0.836508	0.648889	0.642857	0.614035
bin13	0.66118	0.630714	0.855303	0.730769	0.995614	0.641975	0.578125	0.644737	0.7375	0.787879	0.409708	0.685714	0.504274	0.465863	0.906667	0.440171	0.635897	0.802899	0.891566	0.630522	0.434599	0.475257	0.601754	0.589147	0.920579	0.978916	0.61653	0.969697		0.686556	0.466092	FALSE	FALSE	650		bin13	0.483891	0.62963	0.898301	0.687243	0.995885	0.594937	0.596296	0.607527	0.708861	0.852381	0.647602	0.662698	0.614035
bin14	0.691824	0.594627	0.813767	0.696581	0.986667	0.63786	0.567708	0.622222	0.691667	0.795455	0.4197	0.679434	0.504219	0.457831	0.887868	0.400844	0.635897	0.747619	0.879518	0.64257	0.417722	0.440329	0.6157	0.53876	0.911189	0.958974	0.602273	0.943667		0.670803	0.372944	FALSE	FALSE	700		bin14	0.448016	0.611111	0.85	0.699588	1	0.586498	0.548148	0.612903	0.683544	0.857143	0.646082	0.666667	0.625
bin15	0.708864	0.589342	0.766214	0.675105	0.986547	0.621399	0.5625	0.626667	0.654167	0.794671	0.43045	0.628019	0.50211	0.457831	0.874474	0.41453	0.610256	0.690476	0.834607	0.650602	0.41453	0.452675	0.604352	0.505882	0.896296	0.94359	0.613636	0.943029		0.659029	0.417494	FALSE	FALSE	750		bin15	0.441161	0.611111	0.823028	0.699588	0.995885	0.590717	0.518519	0.607527	0.607595	0.828571	0.65033	0.650794	0.625
bin16	0.654971	0.574713	0.758037	0.624473	0.893333	0.604938	0.526042	0.626667	0.629167	0.769179	0.436311	0.63147	0.469752	0.457831	0.866066	0.412799	0.59375	0.644099	0.703252	0.64257	0.413753	0.44856	0.593985	0.439216	0.841005	0.823232	0.599251	0.901042		0.627838	0.43261	FALSE	FALSE	800		bin16	0.512359	0.564815	0.770706	0.691358	0.938924	0.57384	0.485185	0.586022	0.587255	0.811428	0.661932	0.62139	0.595238
bin17	0.645525	0.544061	0.68632	0.560384	0.740961	0.580247	0.521081	0.555556	0.5673	0.649658	0.424554	0.574879	0.454545	0.453815	0.81982	0.357173	0.596892	0.607729	0.483338	0.634538	0.465479	0.444444	0.517311	0.337255	0.766007	0.656566	0.547114	0.859375		0.573283	0.177744	FALSE	FALSE	850		bin17	0.537964	0.509259	0.707338	0.660897	0.889742	0.572055	0.47037	0.563748	0.527751	0.701226	0.662037	0.586345	0.509091
bin18	0.682511	0.51341	0.660256	0.538462	0.689088	0.564821	0.52381	0.47976	0.520833	0.564706	0.423518	0.570048	0.448329	0.457831	0.70967	0.317932	0.580645	0.580215	0.349794	0.610442	0.448329	0.440329	0.475255	0.243137	0.568679	0.621212	0.477273	0.828125		0.531729	0.223139	FALSE	FALSE	900		bin18	0.50463	0.446401	0.647235	0.611111	0.82716	0.532468	0.466667	0.552662	0.485232	0.606061	0.638893	0.542169	0.521212
bin19	0.674265	0.494253	0.6582	0.551282	0.605263	0.565942	0.52381	0.417057	0.470833	0.517647	0.421875	0.574879	0.43666	0.457831	0.628965	0.319304	0.569892	0.546818	0.269702	0.578313	0.443495	0.440329	0.471462	0.188235	0.502347	0.580054	0.469697	0.807292		0.506632	0.367001	FALSE	FALSE	950		bin19	0.470579	0.367501	0.61623	0.589744	0.78903	0.515152	0.466667	0.502646	0.49789	0.525253	0.607843	0.529881	0.527273
bin20	0.670563	0.492293	0.640523	0.555556	0.558442	0.557449	0.521249	0.375075	0.491667	0.494118	0.42634	0.565217	0.43614	0.455627	0.558559	0.325	0.543011	0.534564	0.255169	0.578313	0.451806	0.44856	0.472352	0.172549	0.428494	0.559409	0.454545	0.755208		0.492064	0.665658	FALSE	FALSE	1000		bin20	0.438772	0.38602	0.559299	0.538462	0.760496	0.52381	0.470202	0.457757	0.447257	0.480024	0.605868	0.488095	0.527273
bin21	0.673714	0.472321	0.669801	0.565882	0.542105	0.501676	0.525926	0.352364	0.498166	0.475253	0.44244	0.586599	0.453199	0.448271	0.461611	0.31756	0.511033	0.554736	0.228486	0.555465	0.475731	0.473416	0.481187	0.179314	0.367888	0.542052	0.460679	0.729833		0.483811	0.904558	FALSE	FALSE	1050		bin21	0.431615	0.399361	0.551745	0.538889	0.723148	0.543923	0.475527	0.408447	0.417268	0.463699	0.58996	0.461698	0.526614
bin22	0.66145	0.497537	0.615091	0.576396	0.507748	0.536364	0.526455	0.298614	0.486798	0.445225	0.416162	0.538098	0.432772	0.449452	0.471231	0.336636	0.511531	0.540793	0.19622	0.526784	0.492392	0.499637	0.483333	0.162034	0.34452	0.532416	0.420376	0.704762		0.471815	0.68183	FALSE	FALSE	1100		bin22	0.461203	0.405017	0.547874	0.504384	0.704157	0.551161	0.45787	0.466945	0.42007	0.455268	0.578974	0.405882	0.512887
bin23	0.636817	0.486501	0.590875	0.576923	0.441558	0.482508	0.534392	0.30137	0.481481	0.45098	0.435689	0.567367	0.431696	0.445783	0.461619	0.324729	0.507937	0.538462	0.183333	0.53012	0.480519	0.512504	0.475154	0.174558	0.322444	0.531972	0.463681	0.689684		0.466452	0.684146	FALSE	FALSE	1150		bin23	0.452991	0.440575	0.523075	0.481013	0.695122	0.541871	0.455556	0.46939	0.437229	0.439614	0.594886	0.439514	0.52381
bin24	0.600074	0.500046	0.601332	0.552743	0.441558	0.493506	0.52381	0.30137	0.460905	0.46124	0.430476	0.538371	0.421053	0.449799	0.406306	0.333333	0.491893	0.521205	0.166667	0.53012	0.482791	0.514403	0.477567	0.164706	0.291667	0.5	0.473485	0.680638		0.457538	0.49708	FALSE	FALSE	1200		bin24	0.487721	0.472222	0.518368	0.47057	0.678862	0.532468	0.455556	0.46629	0.47619	0.42029	0.533104	0.43603	0.526954
bin25	0.607097	0.505929	0.615948	0.548523	0.445432	0.523983	0.52381	0.288288	0.45679	0.465116	0.429492	0.521739	0.426667	0.437212	0.395556	0.345833	0.492063	0.514768	0.158333	0.53012	0.4875	0.518519	0.458693	0.149627	0.314815	0.5	0.469697	0.645833		0.456335	0.606646	FALSE	FALSE	1250		bin25	0.511542	0.49537	0.512449	0.477366	0.670732	0.525641	0.455556	0.483423	0.484848	0.410628	0.477828	0.444444	0.530415
bin26	0.619897	0.5	0.592026	0.50211	0.444912	0.53219	0.529101	0.301533	0.465021	0.416188	0.443327	0.548033	0.435556	0.41634	0.343544	0.35	0.481481	0.489451	0.125	0.518072	0.495833	0.514403	0.462184	0.14902	0.305556	0.507246	0.443182	0.640212		0.448979	0.664165	FALSE	FALSE	1300		bin26	0.494995	0.511737	0.470884	0.395062	0.650407	0.549784	0.437037	0.464117	0.476412	0.368784	0.478739	0.44099	0.545455
bin27	0.559062	0.492063	0.542484	0.455696	0.376637	0.540793	0.571429	0.295549	0.421451	0.294118	0.447489	0.528571	0.44414	0.48996	0.222347	0.3375	0.47619	0.455696	0.166667	0.483789	0.552426	0.526749	0.428321	0.101961	0.299035	0.376812	0.443182	0.608466		0.426378	0.838535	FALSE	FALSE	1350		bin27	0.507109	0.528571	0.380489	0.382716	0.581606	0.526145	0.378277	0.511602	0.444444	0.308824	0.446854	0.411018	0.509091
bin28	0.432018	0.49187	0.477489	0.472574	0.328829	0.548956	0.578125	0.330301	0.363786	0.262745	0.457478	0.52381	0.435756	0.630522	0.0881675	0.320603	0.481311	0.433394	0.2125	0.465221	0.576923	0.530864	0.479524	0.0941176	0.325486	0.188406	0.390152	0.625		0.412355	0.466107	FALSE	FALSE	1400		bin28	0.566971	0.490677	0.304999	0.349794	0.461847	0.528139	0.314607	0.509091	0.401709	0.308824	0.341158	0.410347	0.460606
bin29	0.450797	0.485944	0.441282	0.464135	0.354769	0.518987	0.590545	0.321368	0.3625	0.262745	0.53403	0.5	0.452055	0.670683	0.0409108	0.302632	0.580645	0.415584	0.258333	0.444444	0.519314	0.481327	0.471545	0.105882	0.351852	0.0980392	0.347251	0.620513		0.408861	0.306385	FALSE	FALSE	1450		bin29	0.635563	0.467267	0.283266	0.342953	0.35743	0.508547	0.318352	0.49697	0.346154	0.352941	0.387113	0.424603	0.433658
bin30	0.386149	0.519795	0.416667	0.489451	0.392694	0.523423	0.625641	0.391756	0.359516	0.294118	0.556614	0.47619	0.474886	0.670732	0.0630096	0.30565	0.602151	0.41625	0.3875	0.438573	0.54386	0.5125	0.447199	0.156863	0.450704	0.0833333	0.356061	0.6		0.426474	0.103629	FALSE	FALSE	1500		bin30	0.60555	0.474178	0.270653	0.406224	0.32808	0.5	0.310861	0.462381	0.367521	0.406863	0.381375	0.43254	0.410714
bin31	0.385385	0.492202	0.563946	0.540084	0.409415	0.544689	0.70641	0.501007	0.359516	0.39759	0.557148	0.449275	0.502283	0.682927	0.125766	0.32758	0.681209	0.444222	0.483333	0.45122	0.577135	0.531646	0.474521	0.223529	0.534755	0.0784314	0.340824	0.589744		0.462707	0.0125081	TURE	FALSE	1550		bin31	0.587975	0.47619	0.295238	0.495726	0.295833	0.471861	0.307116	0.423077	0.376068	0.485294	0.384977	0.477958	0.357143
bin32	0.416094	0.602156	0.655	0.548523	0.507246	0.557785	0.78836	0.61119	0.3875	0.605691	0.565996	0.516908	0.541667	0.715447	0.228949	0.353464	0.711111	0.535088	0.548259	0.569106	0.53395	0.586498	0.550696	0.286275	0.649713	0.107843	0.337079	0.547288		0.520174	0.000663859	TURE	TURE	1600		bin32	0.565655	0.449896	0.269923	0.526202	0.291498	0.464912	0.252766	0.486389	0.397436	0.596064	0.378586	0.493829	0.315476
bin33	0.469575	0.652633	0.669543	0.535865	0.643449	0.610211	0.845025	0.717336	0.452004	0.672187	0.57499	0.541063	0.591549	0.719512	0.404444	0.350427	0.741379	0.532468	0.662393	0.634146	0.510079	0.56962	0.552632	0.414611	0.71324	0.142157	0.359551	0.613757		0.567709	0.00010634	TURE	TURE	1650		bin33	0.460793	0.467136	0.302459	0.53604	0.352281	0.441103	0.215909	0.466667	0.418803	0.651741	0.375	0.532522	0.36158
bin34	0.469805	0.597005	0.715774	0.529915	0.694129	0.658777	0.891039	0.764493	0.548523	0.739763	0.592798	0.52657	0.633333	0.719512	0.613333	0.42616	0.77739	0.532246	0.748918	0.637134	0.502488	0.607595	0.575391	0.569516	0.756449	0.20098	0.396238	0.564516		0.606778	2.59455e-05	TURE	TURE	1700		bin34	0.390236	0.447067	0.379321	0.540327	0.389521	0.413264	0.165745	0.454136	0.497946	0.681592	0.442478	0.563703	0.290753
bin35	0.522486	0.581766	0.711367	0.550364	0.724457	0.680751	0.890881	0.688611	0.64557	0.780967	0.574664	0.495098	0.681604	0.702337	0.74	0.489451	0.84585	0.588745	0.815789	0.603242	0.505287	0.599913	0.609095	0.698795	0.761488	0.313725	0.429554	0.547407		0.634974	7.64559e-06	TURE	TURE	1750		bin35	0.372154	0.452238	0.428864	0.515633	0.412981	0.435819	0.133632	0.474786	0.484848	0.688889	0.483698	0.554173	0.327044
bin36	0.589058	0.581267	0.705078	0.558954	0.766305	0.646211	0.838308	0.651885	0.672205	0.773663	0.534	0.495098	0.743706	0.675	0.8	0.559504	0.908715	0.598268	0.867368	0.606544	0.511207	0.645299	0.645142	0.835341	0.751919	0.566725	0.408906	0.643275		0.663534	2.25131e-06	TURE	TURE	1800		bin36	0.27153	0.464319	0.442454	0.444909	0.426551	0.464718	0.150294	0.482895	0.458874	0.682051	0.466593	0.552321	0.452778
bin37	0.586626	0.542324	0.62963	0.560495	0.792302	0.668254	0.790695	0.666441	0.723148	0.78154	0.522769	0.492612	0.772663	0.659652	0.825946	0.587719	0.873838	0.604457	0.902765	0.625514	0.524744	0.666667	0.651983	0.899598	0.711462	0.706468	0.473741	0.654241		0.674939	1.78219e-06	TURE	TURE	1850		bin37	0.236447	0.439045	0.492063	0.405002	0.47002	0.424339	0.196563	0.460073	0.519481	0.635897	0.528371	0.565942	0.543489
bin38	0.538568	0.527215	0.498693	0.58653	0.759261	0.598005	0.809524	0.673733	0.698681	0.753165	0.527846	0.512821	0.73856	0.679829	0.86491	0.601021	0.828283	0.607306	0.913848	0.605995	0.578804	0.668165	0.628846	0.927417	0.774453	0.80597	0.570911	0.668844		0.676686	7.80864e-07	TURE	TURE	1900		bin38	0.311482	0.460784	0.465201	0.47148	0.473748	0.470512	0.238456	0.424107	0.545455	0.567477	0.539538	0.547009	0.547158
bin39	0.570224	0.532752	0.512698	0.562374	0.728287	0.559289	0.792712	0.752867	0.672347	0.738151	0.568813	0.546875	0.676555	0.695469	0.886832	0.698779	0.835196	0.649517	0.910448	0.607726	0.581217	0.672383	0.659576	0.941713	0.625092	0.854365	0.588015	0.626625		0.680246	3.74412e-07	TURE	TURE	1950		bin39	0.287698	0.435022	0.618687	0.454586	0.5	0.454157	0.220947	0.367109	0.568376	0.489071	0.554367	0.466368	0.592873
bin40	0.577897	0.533084	0.420635	0.489939	0.717376	0.549303	0.821534	0.723064	0.66811	0.704375	0.634898	0.565221	0.639036	0.674426	0.903666	0.705413	0.802991	0.589809	0.905693	0.575709	0.556952	0.599909	0.681427	0.94642	0.45755	0.893473	0.640406	0.620684		0.66425	2.09873e-06	TURE	TURE	2000		bin40	0.267555	0.427083	0.57037	0.488633	0.530864	0.468566	0.21787	0.310516	0.564658	0.446328	0.545415	0.399061	0.546914
bin41	0.607407	0.545115	0.5	0.464957	0.817043	0.49986	0.785146	0.845411	0.675325	0.68903	0.643481	0.539562	0.63	0.699487	0.902765	0.72549	0.740741	0.595766	0.913184	0.57076	0.63172	0.552632	0.702721	0.957937	0.433862	0.909543	0.652499	0.588812		0.672152	6.79776e-07	TURE	TURE	2050		bin41	0.166667	0.442883	0.505291	0.398148	0.629513	0.49162	0.175305	0.259753	0.551057	0.431034	0.527413	0.383903	0.551282
bin42	0.766667	0.62229	0.533333	0.544082	0.890609	0.486508	0.803283	0.863448	0.690021	0.632991	0.639905	0.596491	0.630077	0.678555	0.904681	0.748842	0.640741	0.59778	0.886766	0.565869	0.647121	0.5671	0.708379	0.950599	0.383333	0.913194	0.665448	0.580214		0.683512	4.94623e-08	TURE	TURE	2100		bin42	0.257407	0.410249	0.411111	0.467419	0.720479	0.508534	0.132088	0.283333	0.527525	0.406061	0.505556	0.401103	0.485507
bin43	0.888889	0.602819	0.722222	0.587215	0.890741	0.458004	0.844194	0.823294	0.702667	0.647887	0.692765	0.644697	0.591281	0.675312	0.913043	0.770492	0.509524	0.615393	0.862528	0.566667	0.623016	0.545455	0.743819	0.895961	0.388889	0.915413	0.68584	0.623746		0.693992	1.54496e-09	TURE	TURE	2150		bin43	0.261905	0.391314	0.333333	0.477778	0.686869	0.471326	0.105391	0.349708	0.489827	0.341298	0.424739	0.396949	0.391053
bin44	NaN	0.55184	1	0.629365	0.847222	0.445634	0.807248	0.807283	0.711659	0.676056	0.689858	0.660606	0.467025	0.674776	0.908499	0.778962	0.6	0.636283	0.858146	0.594203	0.576561	0.528366	0.773306	0.844831	0	0.88172	0.715914	0.618519		0.677181	1.73842e-07	TURE	TURE	2200		bin44	0.206349	0.411342	0.444444	0.429293	0.380952	0.522222	0.0652778	0.438695	0.443823	0.263673	0.328123	0.416989	0.42885
bin45	0	0.560485	0.833333	0.598026	0.833333	0.421053	0.64289	0.818452	0.677666	0.655373	0.704249	0.624155	0.50808	0.720475	0.898286	0.787514	0.588889	0.60425	0.817449	0.614082	0.569841	0.524037	0.685714	0.794798	0	0.839739	0.698766	0.605128		0.629502	5.60099e-06	TURE	TURE	2250		bin45	0.222222	0.481804	0.666667	0.406481	0.311111	0.537374	0.0222222	0.333333	0.354383	0.190249	0.275328	0.424612	0.450142
bin46	0	0.538407	1	0.477778	0.588889	0.422395	0.719577	0.851389	0.643032	0.647113	0.733591	0.664522	0.550337	0.765844	0.896384	0.809842	0.666667	0.604167	0.793876	0.626263	0.639899	0.551592	0.716049	0.78723	NaN	0.815543	0.695442	0.603901		0.65962	1.14672e-06	TURE	TURE	2300		bin46	0.333333	0.57629	1	0.365079	0	0.51938	0	0.266667	0.3129	0.147021	0.283392	0.447051	0.391534
bin47	0	0.533814	NaN	0.34145	1	0.432127	0.793651	0.895299	0.629122	0.615105	0.700238	0.636364	0.638889	0.769231	0.872619	0.801204	0.555556	0.532882	0.792444	0.586851	0.740741	0.569518	0.67867	0.726228	NaN	0.794844	0.668129	0.611111		0.650619	1.49909e-07	TURE	TURE	2350		bin47	0	0.581087	1	0.177778	0	0.477778	0	0.199074	0.264322	0.151931	0.244634	0.437803	0.228571
bin48	0	0.5	NaN	0.21746	NaN	0.439851	0.805556	0.914141	0.635701	0.600237	0.709476	0.592816	0.569801	0.823529	0.845517	0.791606	0.5	0.478236	0.781111	0.563661	0.759259	0.552801	0.657949	0.723369	NaN	0.754604	0.654931	0.695425		0.622681	1.51037e-07	TURE	TURE	2400		bin48	0	0.562216	1	0.0666667	0	0.527699	0	0.125	0.266407	0.139332	0.229382	0.40295	0.2
bin49	NaN	0.509812	NaN	0.233333	NaN	0.436016	0.805556	0.9	0.674908	0.593458	0.670635	0.581871	0.634921	0.84718	0.872465	0.758829	0.5	0.418231	0.680051	0.580409	0.753968	0.534314	0.728261	0.761544	NaN	0.693491	0.658905	0.748834		0.649041	1.1133e-07	TURE	TURE	2450		bin49	0	0.547475	0.833333	0	0	0.528867	0	0.130952	0.266743	0.193548	0.302545	0.396536	0.355556
bin50	NaN	0.551136	NaN	0.583333	NaN	0.51164	1	0.827381	0.685468	0.610354	0.699905	0.5	0.611111	0.808696	0.888889	0.715447	0.5	0.34992	0.623271	0.555997	0.888889	0.519328	0.713853	0.763158	NaN	0.678205	0.668276	0.677778		0.663835	2.58669e-07	TURE	TURE	2500		bin50	0	0.488521	0.5	0.222222	0	0.438062	0	0.152778	0.293735	0.215873	0.351111	0.433007	0.388889
AVE																																				AVE
SP DOT																																				SP DOT
CUED	S13	S14	S15	S16	S17	S18	S19	S20	S21	S22	S23	S24	S25	S26	S27	S28	S29	S31	S32	S33	S34	S35	S36	S37	S38	S39	S40	S41		AVE	T-test			time (ms)		UNCUED	S13	S14	S15	S16	S17	S18	S19	S20	S21	S22	S23	S24	S25
bin1	0.622378	0.545455	0.491228	0.692308	0.666667	0.6	0.473684	0.484848	0.578947	0.526316	0.3	0.428571	0.222222	0.395062	0.6875	0.409091	0.333333	0.501089	0.729167	0.47619	0.483333	0.391304	0.45614	0.458333	0.442857	0.491228	0.607843	0.690476		0.506628	0.990584	FALSE	FALSE	50		bin1	0.624756	0.444444	0.436647	0.469136	0.259259	0.391304	0.5	0.527778	0.444444	0.5	0.789474	0.506667	0.791667
bin2	0.725758	0.545455	0.491228	0.692308	0.666667	0.6	0.473684	0.42029	0.561404	0.526316	0.310526	0.409524	0.277778	0.395062	0.6875	0.409091	0.294118	0.577342	0.6875	0.47619	0.55	0.405797	0.421053	0.458333	0.49127	0.526316	0.588235	0.619048		0.510278	0.949998	FALSE	FALSE	100		bin2	0.549156	0.444444	0.411306	0.469136	0.277778	0.362319	0.5	0.583333	0.460317	0.5	0.77193	0.48	0.791667
bin3	0.774725	0.545455	0.561404	0.692308	0.661404	0.6	0.473684	0.405797	0.561404	0.526316	0.345029	0.4	0.333333	0.382716	0.6875	0.409091	0.333333	0.592593	0.666667	0.47619	0.516667	0.391304	0.430702	0.486111	0.47619	0.473684	0.568627	0.642857		0.514825	0.713103	FALSE	FALSE	150		bin3	0.577342	0.425926	0.421053	0.444444	0.277778	0.342995	0.5	0.527778	0.428571	0.5	0.754386	0.426667	0.770833
bin4	0.826007	0.545455	0.614035	0.692308	0.684211	0.644444	0.473684	0.391304	0.578947	0.54386	0.368421	0.466667	0.333333	0.358025	0.6875	0.378788	0.352941	0.623094	0.625	0.47619	0.516667	0.391304	0.421053	0.472222	0.507937	0.421053	0.555556	0.628571		0.520663	0.447243	FALSE	FALSE	200		bin4	0.607407	0.388889	0.410331	0.444444	0.259259	0.347222	0.5	0.416667	0.428571	0.5	0.7	0.333333	0.791667
bin5	0.78022	0.545455	0.611111	0.692308	0.672807	0.666667	0.473684	0.347826	0.614035	0.578947	0.35614	0.466667	0.333333	0.333333	0.75	0.363636	0.375	0.647059	0.625	0.47619	0.569298	0.391304	0.491228	0.541667	0.52381	0.421053	0.611111	0.666667		0.533056	0.35721	FALSE	FALSE	250		bin5	0.509804	0.388889	0.444444	0.481481	0.240741	0.4	0.5	0.416667	0.47619	0.491228	0.7	0.293333	0.770833
bin6	0.666667	0.545455	0.62963	0.717949	0.7	0.644444	0.473684	0.376812	0.631579	0.684211	0.368421	0.466667	0.314815	0.333333	0.770833	0.363636	0.375	0.595861	0.625	0.47619	0.569298	0.347826	0.5	0.5	0.619048	0.421053	0.592593	0.8		0.539643	0.634031	FALSE	FALSE	300		bin6	0.549156	0.388889	0.461874	0.481481	0.388889	0.466667	0.5	0.416667	0.507937	0.473684	0.65	0.32	0.708333
bin7	0.596078	0.545455	0.750545	0.769231	0.751253	0.6	0.526316	0.449275	0.649123	0.684211	0.315789	0.466667	0.37037	0.382716	0.833333	0.378788	0.375	0.611111	0.666667	0.47619	0.6	0.405797	0.5	0.527778	0.672222	0.473684	0.574074	0.955556		0.568115	0.584482	FALSE	FALSE	350		bin7	0.490278	0.388889	0.474946	0.506173	0.567538	0.48	0.516667	0.416667	0.507937	0.526316	0.65	0.36	0.777778
bin8	0.555556	0.545455	0.833333	0.769231	0.931579	0.6	0.526316	0.478261	0.754386	0.701754	0.368421	0.466667	0.407407	0.430199	0.875	0.454545	0.375	0.617934	0.729167	0.47619	0.6	0.405797	0.583333	0.680556	0.704762	0.614035	0.555556	1		0.608587	0.85076	FALSE	FALSE	400		bin8	0.459477	0.444444	0.716776	0.555556	0.944444	0.48	0.6	0.416667	0.52381	0.631579	0.65	0.386667	0.8
bin9	0.55787	0.545455	0.888889	0.769231	1	0.6	0.526316	0.507246	0.842105	0.719298	0.339474	0.466667	0.351852	0.444444	0.875	0.454545	0.416667	0.649123	0.770833	0.492063	0.590476	0.376812	0.65	0.763889	0.704762	0.777778	0.555556	1		0.62987	0.712246	FALSE	FALSE	450		bin9	0.481481	0.444444	0.793028	0.555556	1	0.48	0.6	0.416667	0.619048	0.754386	0.65	0.48	0.755556
bin10	0.599573	0.543921	0.900599	0.735043	1	0.566667	0.530364	0.570048	0.866959	0.766778	0.302564	0.387879	0.324786	0.381538	0.883586	0.479501	0.483207	0.678363	0.814394	0.622769	0.610847	0.309984	0.671429	0.738801	0.815385	0.800926	0.503704	1		0.638915	0.653655	FALSE	FALSE	500		bin10	0.511029	0.396514	0.760943	0.604938	1	0.453333	0.661111	0.5	0.631944	0.792982	0.676781	0.466111	0.711111
bin11	0.415751	0.564755	0.939815	0.740028	1	0.630769	0.503481	0.488406	0.80848	0.888545	0.288596	0.395238	0.373219	0.389771	0.85119	0.410774	0.565476	0.67735	0.808333	0.43254	0.555672	0.403821	0.605556	0.672269	0.931217	0.962963	0.589226	1		0.639044	0.292813	FALSE	FALSE	550		bin11	0.575	0.477778	0.783769	0.658037	1	0.515958	0.638889	0.491342	0.766082	0.810331	0.669841	0.404242	0.842424
bin12	0.47619	0.545455	0.925926	0.692308	1	0.6	0.526316	0.544137	0.839181	0.842105	0.315789	0.4	0.37037	0.392213	0.833333	0.484848	0.583333	0.666667	0.8125	0.52381	0.539683	0.347826	0.672807	0.569444	0.919841	1	0.555556	1		0.64213	0.267011	FALSE	FALSE	600		bin12	0.6	0.388889	0.851852	0.666667	1	0.48	0.65	0.5	0.666667	0.844737	0.7	0.453333	0.8
bin13	0.407925	0.545455	0.825708	0.692308	1	0.533333	0.526316	0.530303	0.814815	0.842105	0.315789	0.4	0.333333	0.37037	0.770833	0.393939	0.5625	0.648148	0.844444	0.539683	0.52381	0.275362	0.684211	0.444444	0.885714	0.981481	0.5	0.933333		0.611631	0.115294	FALSE	FALSE	650		bin13	0.603175	0.388889	0.819444	0.666667	0.980392	0.48	0.65	0.5	0.619048	0.85	0.7	0.533333	0.8
bin14	0.545455	0.545455	0.70098	0.666667	1	0.533333	0.491228	0.469697	0.796296	0.842105	0.327485	0.444444	0.333333	0.333333	0.666667	0.318182	0.520833	0.589669	0.866667	0.571429	0.492063	0.26087	0.651086	0.361111	0.857143	0.907407	0.5	0.866667		0.587843	0.0745738	FALSE	FALSE	700		bin14	0.564286	0.388889	0.729847	0.666667	1	0.48	0.55	0.5	0.603175	0.85	0.7	0.56	0.8
bin15	0.612374	0.545455	0.612745	0.692308	1	0.533333	0.473684	0.454545	0.685185	0.839181	0.333333	0.355556	0.333333	0.333333	0.625	0.333333	0.479167	0.526316	0.866667	0.571429	0.47619	0.26087	0.639683	0.305556	0.885714	0.87037	0.5	0.866667		0.571833	0.0917296	FALSE	FALSE	750		bin15	0.55	0.388889	0.641612	0.666667	0.980392	0.48	0.516667	0.5	0.492063	0.75	0.7	0.533333	0.8
bin16	0.568376	0.545455	0.650794	0.641026	0.873016	0.533333	0.473684	0.439394	0.685185	0.777778	0.396514	0.31746	0.333333	0.333333	0.625	0.348485	0.5	0.5	0.8	0.539683	0.555556	0.231884	0.689474	0.277778	0.757937	0.740741	0.462963	0.866667		0.552316	0.0959987	FALSE	FALSE	800		bin16	0.69281	0.388889	0.588694	0.62963	0.858674	0.48	0.5	0.5	0.412698	0.75	0.724561	0.533333	0.688889
bin17	0.607143	0.545455	0.619048	0.666667	0.676984	0.533333	0.491228	0.409091	0.666667	0.640523	0.339869	0.285714	0.333333	0.333333	0.625	0.318182	0.5	0.462963	0.644444	0.52381	0.587302	0.217391	0.566667	0.222222	0.624603	0.611111	0.407407	0.866667		0.511648	0.0303655	TURE	FALSE	850		bin17	0.69281	0.388889	0.607212	0.597531	0.77193	0.493333	0.5	0.5	0.428571	0.619298	0.736842	0.56	0.666667
bin18	0.646465	0.545455	0.608333	0.692308	0.65	0.533333	0.5	0.393939	0.62963	0.568627	0.349206	0.380952	0.327485	0.333333	0.5625	0.307359	0.458333	0.444444	0.422222	0.52381	0.507937	0.231884	0.539683	0.138889	0.442857	0.611111	0.388889	0.733333		0.481154	0.0193966	TURE	FALSE	900		bin18	0.568627	0.333333	0.579657	0.6	0.666667	0.493333	0.5	0.538462	0.460317	0.54386	0.701754	0.466667	0.711111
bin19	0.583333	0.545455	0.639706	0.692308	0.566667	0.533333	0.5	0.388669	0.611111	0.529412	0.357143	0.452381	0.296296	0.37037	0.604167	0.296537	0.4375	0.444444	0.266667	0.47619	0.571429	0.246377	0.564286	0.0833333	0.380952	0.611111	0.425926	0.711111		0.470936	0.0831878	FALSE	FALSE	950		bin19	0.448529	0.333333	0.529412	0.586667	0.611111	0.506667	0.5	0.538462	0.47619	0.526316	0.684211	0.453333	0.733333
bin20	0.583333	0.53824	0.607843	0.692308	0.571429	0.533333	0.5	0.368248	0.592593	0.529412	0.431746	0.595238	0.277778	0.362298	0.625	0.318182	0.416667	0.433551	0.244444	0.47619	0.52381	0.26087	0.523088	0.0833333	0.344444	0.555556	0.444444	0.644444		0.467065	0.205019	FALSE	FALSE	1000		bin20	0.408088	0.376906	0.481481	0.52	0.611111	0.506667	0.508772	0.384615	0.428571	0.559649	0.666667	0.493333	0.733333
bin21	0.683333	0.526181	0.726521	0.60564	0.547619	0.464957	0.544725	0.381897	0.561158	0.530637	0.4125	0.702381	0.283224	0.37	0.589286	0.289018	0.347222	0.451515	0.21362	0.504809	0.53254	0.339262	0.556619	0.0845411	0.300654	0.541667	0.473469	0.507071		0.466859	0.460809	FALSE	FALSE	1050		bin21	0.387255	0.353571	0.39436	0.542424	0.679894	0.52058	0.499943	0.319444	0.422103	0.580994	0.577342	0.499444	0.726984
bin22	0.549858	0.559929	0.612121	0.622378	0.54902	0.539336	0.466667	0.314685	0.544834	0.480392	0.372294	0.503175	0.262821	0.380247	0.505628	0.369444	0.377056	0.444444	0.183333	0.437343	0.484203	0.435776	0.531339	0.0836601	0.352183	0.533333	0.413273	0.570707		0.445696	0.207972	FALSE	FALSE	1100		bin22	0.430037	0.326389	0.370833	0.513333	0.555556	0.502315	0.445833	0.377622	0.409524	0.508772	0.558303	0.413003	0.75
bin23	0.493213	0.545455	0.5	0.615385	0.428571	0.533333	0.5	0.287879	0.578947	0.470588	0.411765	0.690476	0.301743	0.37037	0.575	0.307359	0.352941	0.444444	0.2	0.47619	0.47619	0.488177	0.545455	0.0833333	0.344444	0.5	0.425926	0.6		0.448114	0.349582	FALSE	FALSE	1150		bin23	0.449928	0.37037	0.321351	0.5	0.537037	0.492754	0.45	0.405983	0.416667	0.416667	0.546841	0.426667	0.75
bin24	0.467974	0.545455	0.5	0.589744	0.428571	0.577778	0.5	0.272727	0.578947	0.537037	0.409314	0.642857	0.277778	0.37037	0.5625	0.318182	0.294118	0.444444	0.2	0.47619	0.47619	0.550725	0.584416	0.0694444	0.333333	0.481481	0.425926	0.6		0.446982	0.463791	FALSE	FALSE	1200		bin24	0.509804	0.444444	0.314815	0.461538	0.444444	0.5	0.45	0.441919	0.45	0.35	0.555556	0.4	0.75
bin25	0.456944	0.554113	0.5	0.538462	0.428571	0.6	0.5	0.275362	0.578947	0.555556	0.375	0.642857	0.277778	0.345679	0.5625	0.318182	0.294118	0.444444	0.2	0.47619	0.492063	0.550725	0.584416	0.0416667	0.380952	0.462963	0.444444	0.6		0.445783	0.512601	FALSE	FALSE	1250		bin25	0.577342	0.444444	0.333333	0.444444	0.444444	0.5	0.45	0.441919	0.45	0.35	0.553606	0.4	0.6875
bin26	0.547619	0.545455	0.5	0.564103	0.435714	0.6	0.518519	0.275362	0.578947	0.611111	0.427696	0.650794	0.296296	0.320988	0.5	0.318182	0.294118	0.42885	0.133333	0.47619	0.492063	0.521739	0.590909	0.0416667	0.380952	0.421053	0.388889	0.511111		0.441845	0.469154	FALSE	FALSE	1300		bin26	0.508715	0.444444	0.300654	0.382716	0.425926	0.541667	0.45	0.472222	0.466667	0.286842	0.578947	0.373333	0.6875
bin27	0.434188	0.545455	0.5625	0.461538	0.391813	0.6	0.555556	0.26087	0.491228	0.5	0.567538	0.622222	0.340959	0.45679	0.318056	0.318182	0.294118	0.385965	0.177778	0.587302	0.587302	0.536232	0.545455	0.0416667	0.360317	0.280702	0.388889	0.466667		0.431403	0.50502	FALSE	FALSE	1350		bin27	0.532026	0.444444	0.221429	0.407407	0.410331	0.555556	0.433333	0.542929	0.5	0.210526	0.526316	0.384444	0.625
bin28	0.41746	0.590476	0.488889	0.435897	0.333333	0.6	0.526316	0.323452	0.473684	0.444444	0.490196	0.688889	0.372549	0.654321	0.15	0.301587	0.411765	0.345029	0.2	0.580952	0.666667	0.478261	0.5	0.108889	0.435714	0.175439	0.296296	0.488889		0.427836	0.868149	FALSE	FALSE	1400		bin28	0.45098	0.444444	0.235897	0.37037	0.385965	0.527778	0.35	0.6	0.516667	0.245614	0.463938	0.472222	0.625
bin29	0.488889	0.571429	0.47619	0.410256	0.345029	0.6	0.54386	0.30303	0.508772	0.444444	0.61152	0.711111	0.481481	0.765432	0.0625	0.3	0.647059	0.333333	0.333333	0.6	0.52381	0.463768	0.439394	0.16	0.380952	0.148148	0.203704	0.6		0.444909	0.343844	FALSE	FALSE	1450		bin29	0.559967	0.444444	0.216667	0.400285	0.315789	0.48	0.35	0.6	0.466667	0.350877	0.403509	0.541667	0.509804
bin30	0.423077	0.603175	0.404762	0.410256	0.350877	0.628571	0.578947	0.403968	0.473684	0.462963	0.660131	0.555556	0.5	0.769231	0.0625	0.327778	0.666667	0.296296	0.577778	0.557937	0.555556	0.507246	0.358586	0.24	0.4	0.111111	0.222222	0.6		0.453888	0.254403	FALSE	FALSE	1500		bin30	0.565278	0.462963	0.255556	0.487179	0.214425	0.506667	0.35	0.6	0.45	0.368421	0.421053	0.569444	0.45098
bin31	0.428571	0.593795	0.525641	0.435897	0.321053	0.630952	0.631579	0.473684	0.473684	0.45098	0.666667	0.4	0.490196	0.75641	0.104167	0.365079	0.705882	0.385621	0.644444	0.603175	0.660526	0.530303	0.468254	0.373333	0.499206	0.111111	0.222222	0.577778		0.483222	0.0353656	TURE	FALSE	1550		bin31	0.543056	0.555556	0.261111	0.505641	0.203704	0.486111	0.366667	0.533333	0.466667	0.491228	0.421053	0.577295	0.392157
bin32	0.453968	0.681818	0.425	0.538462	0.508772	0.583333	0.611111	0.47162	0.491228	0.604167	0.648148	0.4	0.470588	0.730769	0.0833333	0.428571	0.784314	0.568627	0.666667	0.616667	0.578947	0.621212	0.584336	0.4	0.673016	0.12963	0.222222	0.533333		0.518209	0.00990443	TURE	FALSE	1600		bin32	0.550245	0.592593	0.333333	0.472222	0.254902	0.458333	0.3	0.652778	0.5	0.614035	0.421053	0.57971	0.333333
bin33	0.5	0.634921	0.52381	0.538462	0.685185	0.553419	0.732026	0.532026	0.491228	0.645833	0.491228	0.444444	0.490196	0.679487	0.229167	0.507937	0.823529	0.54902	0.666667	0.65	0.526316	0.636364	0.689474	0.56	0.676984	0.12963	0.240741	0.52381		0.548282	0.00279549	TURE	FALSE	1650		bin33	0.550245	0.574074	0.326007	0.458333	0.392157	0.452222	0.216667	0.380952	0.45	0.684211	0.491228	0.552701	0.352941
bin34	0.472222	0.554113	0.626984	0.589744	0.696881	0.615385	0.79902	0.680556	0.54386	0.729167	0.473684	0.4	0.54902	0.679487	0.4375	0.530303	0.816176	0.647059	0.777778	0.628571	0.508772	0.712121	0.716667	0.733333	0.738095	0.185185	0.296296	0.5		0.594214	0.000616318	TURE	TURE	1700		bin34	0.488971	0.576253	0.465201	0.47096	0.459559	0.493333	0.118421	0.314286	0.433333	0.719298	0.578947	0.560606	0.313725
bin35	0.615385	0.530303	0.533333	0.692308	0.696881	0.694444	0.848611	0.53869	0.649123	0.75	0.45614	0.380952	0.680147	0.657436	0.666667	0.575758	0.833333	0.705882	0.822222	0.587302	0.5	0.727273	0.741228	0.902778	0.736842	0.296296	0.333333	0.461538		0.629079	0.000227482	TURE	TURE	1750		bin35	0.48722	0.54902	0.530303	0.437229	0.5	0.594203	0.122807	0.4	0.383333	0.684211	0.473684	0.469697	0.294118
bin36	0.65812	0.560606	0.833333	0.615385	0.726035	0.611111	0.844444	0.489011	0.596491	0.708333	0.373684	0.428571	0.666667	0.64	0.708333	0.575758	0.928571	0.699755	0.861905	0.555556	0.528322	0.757576	0.736355	0.930556	0.735185	0.611111	0.388889	0.641026		0.657525	0.000249261	TURE	TURE	1800		bin36	0.316239	0.509804	0.654762	0.364787	0.512698	0.594203	0.125731	0.533333	0.483333	0.649123	0.551754	0.428571	0.4375
bin37	0.457143	0.545455	0.666667	0.594017	0.744444	0.611111	0.790476	0.482517	0.701754	0.6875	0.350877	0.437729	0.652015	0.63	0.770833	0.603175	0.807977	0.702778	0.923077	0.571429	0.605801	0.742424	0.686508	0.944444	0.695416	0.740741	0.407407	0.662121		0.650566	0.00032367	TURE	TURE	1850		bin37	0.292929	0.392157	0.622222	0.427635	0.615385	0.477602	0.176471	0.5	0.5	0.614035	0.55	0.428571	0.573611
bin38	0.416667	0.53824	0.5	0.690909	0.693651	0.487374	0.769231	0.515152	0.719298	0.625	0.403509	0.5	0.647436	0.623188	0.875	0.619048	0.833333	0.733333	0.923077	0.580952	0.762759	0.716733	0.615385	0.957729	0.675926	0.814815	0.538126	0.857143		0.665465	0.00032821	TURE	TURE	1900		bin38	0.365079	0.333333	0.4	0.583333	0.666667	0.523088	0.250654	0.5	0.5	0.561404	0.592157	0.396825	0.476068
bin39	0.75	0.585965	0.5	0.875	0.684524	0.294872	0.769231	0.7	0.653996	0.625	0.526316	0.5	0.583333	0.68643	0.9375	0.688889	0.833333	0.742857	0.923077	0.590476	0.700855	0.820817	0.604701	0.968975	0.433333	0.833333	0.54902	0.838095		0.685712	0.000119732	TURE	TURE	1950		bin39	0.409524	0.176471	0.466667	0.59697	0.836111	0.492063	0.300366	0.31746	0.55	0.45614	0.603486	0.333333	0.474359
bin40	0.666667	0.584967	0.5	0.666667	0.714286	0.384615	0.84188	0.688889	0.574074	0.5625	0.614379	0.454545	0.636364	0.681818	0.9375	0.69281	0.821429	0.666667	0.916667	0.492063	0.515152	0.681818	0.545455	1	0.466667	0.830065	0.607843	0.783333		0.661754	0.000190376	TURE	TURE	2000		bin40	0.305556	0.196078	0.388889	0.688889	0.805556	0.45	0.344988	0.361111	0.55	0.421053	0.555754	0.3	0.418182
bin41	0.777778	0.641612	1	0.571429	0.866667	0.485043	0.795455	0.777778	0.648148	0.552778	0.632353	0.363636	0.656566	0.707792	0.936111	0.705882	0.944444	0.675824	1	0.492063	0.566667	0.621212	0.5	1	0.166667	0.823529	0.691721	0.75		0.691113	0.000592493	TURE	TURE	2050		bin41	0.333333	0.235294	0	0.706349	1	0.410331	0.339683	0.305556	0.466667	0.444444	0.571429	0.25	0.340741
bin42	1	0.730937	1	0.711111	1	0.570707	0.785714	0.759259	0.660131	0.555556	0.636574	0.424242	0.851852	0.681955	1	0.666667	0.733333	0.564103	1	0.492063	0.589286	0.560606	0.402778	1	0	0.823529	0.722222	0.833333		0.70557	0.000160532	TURE	TURE	2100		bin42	0.111111	0.2	0	0.8	1	0.396514	0.333333	0.333333	0.378947	0.352941	0.496032	0.222681	0.125
bin43	1	0.722222	1	0.866667	1	0.515152	0.84127	0.75	0.647059	0.688889	0.698413	0.454545	0.799603	0.697978	1	0.686275	0.5	0.538462	0.916667	0.492063	0.52381	0.484848	0.289683	0.922658	0	0.882353	0.722222	0.805556		0.694514	4.86498e-06	TURE	TURE	2150		bin43	0	0.249206	0	0.6	0.333333	0.411765	0.277778	0.388889	0.331957	0.291095	0.3	0.235294	0.047619
bin44	NaN	0.678746	NaN	0.75	1	0.436364	0.822222	0.75	0.711111	0.733333	0.714286	0.454545	0.634921	0.761905	1	0.735294	0.5	0.594017	0.857143	0.566667	0.433333	0.522398	0.333333	0.865385	0	0.843137	0.722222	0.666667		0.657193	7.22708e-05	TURE	TURE	2200		bin44	0	0.285104	0	0.222222	0	0.45098	0.333333	0.5	0.364924	0.195833	0.227273	0.223529	0.238095
bin45	NaN	0.603175	NaN	0.694444	1	0.345455	0.477778	0.691667	0.720635	0.723077	0.779138	0.433333	0.833333	0.857143	1	0.75	0.555556	0.545455	0.830159	0.6	0.466667	0.477602	0.301587	0.830769	NaN	0.803922	0.722222	0.666667		0.668391	1.08619e-06	TURE	TURE	2250		bin45	0.333333	0.5	0	0	0	0.458252	0.111111	0	0.400735	0.2	0.109007	0.189377	0.47619
bin46	NaN	0.558081	NaN	0.555556	1	0.3	0.222222	0.775926	0.702991	0.692308	0.778788	0.647619	0.822222	0.857143	0.916667	0.8125	0.666667	0.555556	0.8	0.566667	0.533333	0.47619	0.428571	0.755556	NaN	0.8125	0.745643	0.611111		0.663753	2.3244e-07	TURE	TURE	2300		bin46	1	0.5	NaN	0	NaN	0.375	0	0	0.466667	0.190476	0.144841	0.222222	0.555556
bin47	NaN	0.496633	NaN	0.111111	1	0.4	0.333333	0.809524	0.612121	0.675214	0.684524	0.733333	0.722222	0.857143	0.911111	0.872222	0.555556	0.555556	0.766667	0.526316	0.666667	0.5	0.428571	0.566667	NaN	0.777778	0.75641	0.5		0.632747	3.68165e-06	TURE	TURE	2350		bin47	NaN	0.537037	NaN	0	NaN	0.294118	0	0	0.324176	0.178266	0.166667	0.257576	0.888889
bin48	NaN	0.5	NaN	0	NaN	0.333333	0.5	0.849206	0.622222	0.515152	0.849206	0.666667	0.555556	0.904762	0.891667	0.866667	0.5	0.444444	0.694444	0.578947	0.75	0.45614	0.517857	0.833333	NaN	0.673016	0.790598	0.5		0.616384	0.000265247	TURE	TURE	2400		bin48	NaN	0.592593	NaN	0	NaN	0.297222	0	0	0.292929	0.124242	0.222222	0.321212	1
bin49	NaN	0.537037	NaN	NaN	NaN	0.425926	0.666667	0.833333	0.652778	0.533333	0.8	0.666667	0.5	0.897436	0.869048	0.754579	0.5	0.384259	0.666667	0.614035	0.75	0.421053	0.708333	1	NaN	0.624542	0.828283	0.5		0.657999	0.000202009	TURE	TURE	2450		bin49	NaN	0.666667	NaN	0	NaN	0.234848	0	0	0.187879	0.2	0.333333	0.4	1
bin50	NaN	0.5	NaN	NaN	NaN	0.442857	1	0.8	0.708333	0.710317	0.783333	0.4	0.5	0.769231	0.809524	0.666667	0.5	0.191667	0.555556	0.624756	0.833333	0.491228	0.710317	1	NaN	0.666667	0.757576	0		0.627016	0.00256515	TURE	FALSE	2500		bin50	NaN	0.444444	NaN	0.333333	NaN	0.277778	0	NaN	0.2	0.277778	0.333333	0.537037	1
AVE																																				AVE
SP NEU																																				SP NEU
CUED	S13	S14	S15	S16	S17	S18	S19	S20	S21	S22	S23	S24	S25	S26	S27	S28	S29	S31	S32	S33	S34	S35	S36	S37	S38	S39	S40	S41		AVE	T-test			time (ms)		UNCUED	S13	S14	S15	S16	S17	S18	S19	S20	S21	S22	S23	S24	S25
bin1	0.869658	0.48	0.611111	0.64	0.372549	0.538462	0.444444	0.479167	0.444444	0.434783	0.47619	0.409524	0.452381	0.377778	0.492063	0.272727	0.395833	0.47619	0.448276	0.545455	0.424242	0.5	0.35	0.428571	0.529412	0.285714	0.538462	0.428571		0.4695	0.610106	FALSE	FALSE	50		bin1	0.361111	0.533333	0.479469	0.466667	0.478261	0.468186	0.5	0.5	0.5	0.529412	0.470588	0.363636	0.638889
bin2	0.846154	0.48	0.722222	0.64	0.411765	0.538462	0.444444	0.4375	0.428571	0.449275	0.468975	0.383333	0.464286	0.333333	0.47619	0.272727	0.479167	0.538462	0.448276	0.545455	0.393939	0.583333	0.35	0.428571	0.490196	0.285714	0.538462	0.404762		0.474413	0.663878	FALSE	FALSE	100		bin2	0.332723	0.533333	0.416667	0.466667	0.478261	0.474834	0.5	0.5	0.438596	0.529412	0.470588	0.409091	0.666667
bin3	0.762821	0.48	0.694444	0.64	0.411765	0.538462	0.444444	0.4375	0.460317	0.449275	0.484848	0.4375	0.464286	0.333333	0.47619	0.272727	0.5	0.583333	0.436782	0.545455	0.378788	0.6	0.4	0.428571	0.470588	0.285714	0.538462	0.452381		0.478857	0.743318	FALSE	FALSE	150		bin3	0.274725	0.533333	0.424444	0.466667	0.478261	0.481481	0.5	0.5	0.421053	0.529412	0.470588	0.409091	0.708333
bin4	0.834188	0.48	0.656566	0.64	0.411765	0.538462	0.444444	0.4375	0.444444	0.478261	0.5	0.5	0.428571	0.333333	0.47619	0.272727	0.5	0.569963	0.448276	0.545455	0.363636	0.566667	0.457895	0.47619	0.431373	0.285714	0.538462	0.47619		0.483438	0.816626	FALSE	FALSE	200		bin4	0.249084	0.533333	0.452222	0.466667	0.478261	0.481481	0.5	0.5	0.438596	0.529412	0.470588	0.409091	0.75
bin5	0.941919	0.48	0.727273	0.613333	0.372549	0.564103	0.444444	0.466667	0.47619	0.478261	0.5	0.5	0.428571	0.333333	0.634921	0.272727	0.5	0.733333	0.448276	0.545455	0.437951	0.55	0.482456	0.492063	0.372549	0.355556	0.538462	0.47619		0.505949	0.929871	FALSE	FALSE	250		bin5	0.309524	0.555556	0.5	0.466667	0.507246	0.481481	0.5	0.5	0.473684	0.529412	0.470588	0.393939	0.75
bin6	0.923077	0.506667	0.727273	0.594444	0.45098	0.692308	0.555556	0.533333	0.47619	0.492754	0.5	0.5625	0.428571	0.333333	0.809524	0.272727	0.541667	0.931746	0.517241	0.545455	0.468975	0.55	0.457895	0.52381	0.470588	0.477778	0.565641	0.880952		0.563964	0.904275	FALSE	FALSE	300		bin6	0.4	0.644444	0.565641	0.488889	0.57971	0.555556	0.559524	0.483333	0.491228	0.529412	0.470588	0.396825	0.75
bin7	0.923077	0.52	0.734848	0.541667	0.764706	0.692308	0.555556	0.6	0.507937	0.550725	0.5	0.604167	0.428571	0.34127	0.857143	0.272727	0.5625	0.97619	0.632184	0.545455	0.5	0.5	0.483333	0.571429	0.607843	0.571429	0.602564	0.97619		0.604422	0.600868	FALSE	FALSE	350		bin7	0.400463	0.711111	0.620726	0.6	0.839262	0.555556	0.595238	0.466667	0.526316	0.647059	0.470588	0.492063	0.75
bin8	1	0.546667	0.800505	0.541667	1	0.692308	0.555556	0.644444	0.587302	0.637681	0.5	0.604167	0.52381	0.428571	0.866667	0.272727	0.577778	1	0.804598	0.545455	0.484848	0.483333	0.473684	0.650794	0.784314	0.714286	0.615385	1		0.654877	0.63935	FALSE	FALSE	400		bin8	0.407407	0.733333	0.811594	0.711111	0.969697	0.555556	0.607143	0.55	0.526316	0.686275	0.431373	0.571429	0.75
bin9	0.90303	0.56	0.911616	0.575	1	0.692308	0.555556	0.720635	0.730159	0.666667	0.571429	0.625	0.535714	0.404762	0.898246	0.272727	0.644444	0.97619	0.850575	0.651515	0.5	0.483333	0.436647	0.571429	0.882353	0.880952	0.717949	1		0.686366	0.759229	FALSE	FALSE	450		bin9	0.45098	0.720635	0.869565	0.733333	1	0.555556	0.607143	0.6	0.578947	0.803922	0.431373	0.560606	0.75
bin10	0.858442	0.597295	0.877778	0.644444	1	0.709557	0.592593	0.711289	0.751587	0.736935	0.580952	0.616667	0.506966	0.433333	0.90928	0.277056	0.652778	0.97619	0.856404	0.718615	0.472222	0.502315	0.488889	0.543921	0.87395	0.948413	0.702866	1		0.697883	0.849013	FALSE	FALSE	500		bin10	0.456863	0.836364	0.827743	0.778571	1	0.555185	0.561728	0.555556	0.641326	0.845316	0.551852	0.517406	0.726984
bin11	0.907407	0.554167	0.941919	0.563312	1	0.730769	0.476852	0.735531	0.783793	0.658213	0.649415	0.699405	0.558379	0.288889	0.937831	0.281385	0.676768	0.97619	0.876862	0.744108	0.52969	0.484962	0.535948	0.520443	0.91634	0.84127	0.823329	1		0.703328	0.615538	FALSE	FALSE	550		bin11	0.408317	0.848718	0.911067	0.85	1	0.546296	0.660159	0.67076	0.713364	0.827451	0.518519	0.585859	0.722222
bin12	0.772283	0.6	0.909091	0.652778	1	0.692308	0.555556	0.714286	0.761905	0.695652	0.633333	0.6875	0.511905	0.333333	0.950794	0.272727	0.666667	0.857143	0.862069	0.727273	0.484848	0.483333	0.508772	0.530303	0.882353	0.92674	0.74359	1		0.693448	0.566991	FALSE	FALSE	600		bin12	0.433551	0.866667	0.884058	0.8	1	0.555556	0.583333	0.666667	0.684211	0.921569	0.462963	0.530303	0.75
bin13	0.733333	0.56	0.909091	0.638889	0.980392	0.769231	0.555556	0.714286	0.714286	0.695652	0.6	0.708333	0.535714	0.377778	0.952381	0.272727	0.666667	0.761905	0.862069	0.727273	0.469697	0.533333	0.508772	0.5	0.882353	0.92674	0.730769	1		0.68883	0.379294	FALSE	FALSE	650		bin13	0.345588	0.933333	0.908696	0.844444	1	0.555556	0.571429	0.7	0.684211	0.941176	0.481481	0.545455	0.75
bin14	0.733333	0.466667	0.9	0.597222	0.9375	0.769231	0.555556	0.692308	0.634921	0.695652	0.6	0.6875	0.535714	0.4	0.952381	0.272727	0.666667	0.768254	0.827586	0.727273	0.469697	0.416667	0.553606	0.424242	0.882353	0.933333	0.730769	0.952381		0.670841	0.253938	FALSE	FALSE	700		bin14	0.3125	0.933333	0.879249	0.866667	1	0.555556	0.559524	0.7	0.578947	0.941176	0.407407	0.590909	0.75
bin15	0.785714	0.44	0.9	0.56	0.956944	0.769231	0.555556	0.692308	0.666667	0.695652	0.6	0.625	0.535714	0.4	0.936508	0.272727	0.666667	0.690476	0.720443	0.727273	0.439394	0.483333	0.555556	0.409091	0.882353	0.933333	0.730769	0.928571		0.662831	0.344932	FALSE	FALSE	750		bin15	0.32598	0.933333	0.869565	0.8	1	0.555556	0.52381	0.7	0.438596	0.941176	0.470588	0.560606	0.75
bin16	0.702778	0.48	0.90303	0.546667	0.866667	0.717949	0.444444	0.666667	0.619048	0.661397	0.558772	0.625	0.5	0.4	0.903175	0.272727	0.666667	0.666667	0.559524	0.727273	0.349206	0.5	0.555556	0.318182	0.843137	0.866667	0.730769	0.809524		0.623625	0.204528	FALSE	FALSE	800		bin16	0.4375	0.822222	0.811594	0.8	0.942029	0.530864	0.47619	0.666667	0.508772	0.941176	0.529412	0.545455	0.75
bin17	0.6875	0.48	0.906061	0.546667	0.688889	0.615385	0.444444	0.564103	0.555556	0.560606	0.517544	0.625	0.464286	0.4	0.85	0.272727	0.666667	0.680556	0.369048	0.727273	0.396825	0.5	0.537037	0.212121	0.823529	0.6	0.705128	0.714286		0.575401	0.18938	FALSE	FALSE	850		bin17	0.416667	0.688889	0.685112	0.8	0.913043	0.518519	0.464286	0.616667	0.508772	0.839461	0.511029	0.560606	0.625
bin18	0.723611	0.453333	0.9	0.52	0.667075	0.583333	0.444444	0.474359	0.52381	0.515152	0.528322	0.666667	0.464286	0.4	0.714286	0.19697	0.666667	0.620098	0.22619	0.712121	0.445887	0.466667	0.462963	0.121212	0.647059	0.533333	0.512821	0.714286		0.53232	0.330937	FALSE	FALSE	900		bin18	0.431373	0.533333	0.562222	0.8	0.84058	0.493827	0.464286	0.583333	0.526316	0.666667	0.543056	0.454545	0.625
bin19	0.7875	0.44	0.9	0.546667	0.54902	0.583333	0.444444	0.361111	0.52381	0.454545	0.529412	0.645833	0.463404	0.4	0.588889	0.227273	0.666667	0.616558	0.166667	0.681818	0.38456	0.45	0.464912	0.0606061	0.529412	0.4	0.487179	0.690476		0.501575	0.295127	FALSE	FALSE	950		bin19	0.479167	0.4	0.571282	0.8	0.787879	0.444444	0.464286	0.466667	0.526316	0.625	0.533333	0.484848	0.625
bin20	0.84127	0.44	0.875	0.573333	0.529412	0.594017	0.444444	0.333333	0.52381	0.409091	0.529412	0.604167	0.481481	0.4	0.460317	0.227273	0.6	0.603486	0.144621	0.681818	0.396825	0.45	0.447368	0.0151515	0.392157	0.383333	0.487179	0.642857		0.482541	0.354543	FALSE	FALSE	1000		bin20	0.431746	0.466667	0.513333	0.733333	0.681818	0.45679	0.464286	0.416667	0.491228	0.5625	0.577778	0.469697	0.625
bin21	0.806349	0.449475	0.85463	0.604701	0.538462	0.566434	0.448148	0.240741	0.482295	0.416541	0.571795	0.595833	0.494901	0.388889	0.327485	0.242842	0.533333	0.615686	0.124647	0.588437	0.360902	0.512745	0.47271	0.0347594	0.353758	0.35	0.49942	0.623016		0.467819	0.290158	FALSE	FALSE	1050		bin21	0.396825	0.474074	0.544567	0.726984	0.601347	0.441224	0.477619	0.342857	0.491228	0.4875	0.580952	0.445887	0.597222
bin22	0.817593	0.466438	0.910714	0.6	0.519608	0.619048	0.439153	0.141414	0.553704	0.399711	0.518182	0.522222	0.422078	0.4	0.352844	0.208003	0.529966	0.611111	0.102767	0.624843	0.427925	0.511111	0.533333	0.0360624	0.266667	0.410714	0.482857	0.520513		0.462449	0.129207	FALSE	FALSE	1100		bin22	0.503367	0.590049	0.625439	0.688889	0.676548	0.493734	0.469524	0.408991	0.458647	0.459559	0.621032	0.442857	0.626984
bin23	0.811966	0.493333	0.87963	0.6	0.529412	0.5	0.444444	0.166667	0.52381	0.439394	0.566449	0.511111	0.444444	0.4	0.354762	0.227273	0.533333	0.611111	0.107143	0.590909	0.428571	0.55	0.483333	0.0923521	0.27451	0.354167	0.513889	0.5		0.461858	0.227587	FALSE	FALSE	1150		bin23	0.469363	0.535043	0.586752	0.666667	0.652174	0.481481	0.464286	0.421053	0.5	0.470588	0.549451	0.484127	0.625
bin24	0.78022	0.5	0.87963	0.52	0.529412	0.5	0.444444	0.166667	0.492063	0.454545	0.554638	0.4375	0.444444	0.4	0.301587	0.227273	0.595238	0.555556	0.107143	0.590909	0.409524	0.516667	0.45	0.0909091	0.235294	0.3125	0.5	0.487179		0.445834	0.134351	FALSE	FALSE	1200		bin24	0.459559	0.555556	0.589744	0.666667	0.652174	0.481481	0.464286	0.403509	0.481481	0.470588	0.465201	0.46176	0.684524
bin25	0.811966	0.492754	0.888889	0.56	0.551471	0.474359	0.444444	0.111111	0.47619	0.454545	0.629365	0.375	0.444444	0.4	0.269841	0.227273	0.571429	0.555556	0.119048	0.590909	0.428571	0.516667	0.45	0.0909091	0.235294	0.3125	0.474359	0.5		0.444889	0.201887	FALSE	FALSE	1250		bin25	0.47162	0.580952	0.576923	0.666667	0.652174	0.45679	0.464286	0.473684	0.444444	0.470588	0.371429	0.469697	0.738095
bin26	0.84188	0.478261	0.814815	0.506667	0.5625	0.384615	0.444444	0.179293	0.492063	0.383838	0.620175	0.5	0.444444	0.355556	0.253968	0.227273	0.571429	0.555556	0.107143	0.560606	0.428571	0.533333	0.465789	0.0909091	0.176471	0.375	0.423077	0.5		0.438488	0.23028	FALSE	FALSE	1300		bin26	0.489164	0.571429	0.545128	0.533333	0.637681	0.487179	0.428571	0.435673	0.463938	0.392157	0.416667	0.507937	0.75
bin27	0.746337	0.42029	0.777778	0.4	0.480392	0.333333	0.444444	0.224242	0.484127	0.333333	0.603509	0.5625	0.432099	0.4	0.222222	0.227273	0.571429	0.555556	0.154762	0.454545	0.5	0.516667	0.457895	0.0454545	0.176471	0.229167	0.423077	0.47619		0.416182	0.575354	FALSE	FALSE	1350		bin27	0.445362	0.586081	0.426667	0.4	0.565217	0.480513	0.309524	0.531944	0.421053	0.313725	0.390278	0.424242	0.625
bin28	0.485348	0.362319	0.8	0.48	0.411765	0.384615	0.444444	0.290909	0.373016	0.301587	0.555556	0.5	0.455366	0.533333	0.0517544	0.242424	0.549451	0.538126	0.202381	0.439394	0.55	0.5	0.586842	0	0.176471	0	0.346154	0.522222		0.395838	0.872034	FALSE	FALSE	1400		bin28	0.509804	0.562271	0.347222	0.4	0.376812	0.525641	0.25	0.447222	0.385965	0.313725	0.363492	0.328722	0.541667
bin29	0.424786	0.376812	0.785185	0.48	0.439951	0.384615	0.496296	0.3	0.3	0.285714	0.555556	0.458333	0.410256	0.466667	0	0.287879	0.615385	0.529412	0.261905	0.409091	0.571429	0.416667	0.6	0	0.294118	0	0.294872	0.444444		0.388906	0.657109	FALSE	FALSE	1450		bin29	0.612745	0.422222	0.329231	0.311111	0.304348	0.5	0.25	0.416667	0.333333	0.352941	0.456944	0.333333	0.5
bin30	0.324786	0.471014	0.703704	0.533333	0.4375	0.384615	0.666667	0.311111	0.290476	0.301587	0.588889	0.4375	0.435897	0.511111	0	0.318182	0.641026	0.603486	0.369048	0.409091	0.587302	0.433333	0.576316	0.047619	0.490196	0	0.333333	0.466667		0.416921	0.224179	FALSE	FALSE	1500		bin30	0.723611	0.4	0.230292	0.273016	0.291925	0.487179	0.261905	0.456944	0.368421	0.431373	0.4375	0.362319	0.5
bin31	0.355556	0.458333	0.740741	0.693333	0.525641	0.416667	0.766667	0.361111	0.285714	0.396825	0.6	0.355556	0.525641	0.577778	0.065873	0.344156	0.692308	0.462963	0.440476	0.439394	0.634921	0.466667	0.492982	0.0634921	0.588235	0.0208333	0.333333	0.444444		0.448201	0.0831405	FALSE	FALSE	1550		bin31	0.720588	0.444444	0.277056	0.309524	0.301587	0.461538	0.261905	0.501709	0.368421	0.490196	0.408088	0.416996	0.375
bin32	0.357143	0.601667	0.518519	0.666667	0.589744	0.416667	0.933333	0.624339	0.301587	0.460317	0.623016	0.355556	0.602564	0.711111	0.165079	0.369408	0.692308	0.470588	0.511905	0.636364	0.623016	0.583333	0.473684	0.238095	0.647059	0.0625	0.307692	0.511111		0.501942	0.0293952	TURE	FALSE	1600		bin32	0.70098	0.511111	0.229365	0.415751	0.275397	0.474359	0.214286	0.615385	0.368421	0.627451	0.411765	0.535573	0.375
bin33	0.285714	0.773333	0.410714	0.613333	0.74359	0.472222	0.9	0.793651	0.349206	0.507937	0.661111	0.511111	0.615385	0.733333	0.31746	0.333333	0.74359	0.588235	0.678571	0.651515	0.592982	0.55	0.376906	0.396825	0.754902	0.0625	0.346154	0.666667		0.551082	0.0050156	TURE	FALSE	1650		bin33	0.5625	0.644444	0.279866	0.487179	0.365079	0.410256	0.214286	0.632479	0.403509	0.647059	0.392157	0.652174	0.333333
bin34	0.5	0.706667	0.5	0.533333	0.692308	0.459402	0.9	0.666667	0.571429	0.55	0.633333	0.622222	0.666667	0.733333	0.603175	0.378788	0.818182	0.45098	0.72619	0.727273	0.563353	0.566667	0.352941	0.584416	0.790476	0.145833	0.358974	0.6		0.585807	0.000881995	TURE	TURE	1700		bin34	0.396062	0.622222	0.332925	0.5	0.428571	0.337436	0.167989	0.583333	0.421053	0.686275	0.490196	0.608696	0.0833333
bin35	0.512821	0.689444	0.366667	0.550145	0.770163	0.384615	0.896296	0.68254	0.698413	0.709524	0.5	0.533333	0.666667	0.711111	0.753968	0.363636	0.969697	0.470588	0.802469	0.718615	0.537037	0.616667	0.415033	0.606061	0.811966	0.416667	0.466667	0.65873		0.617126	0.000580846	TURE	TURE	1750		bin35	0.459402	0.622222	0.371062	0.5	0.465789	0.28	0.145128	0.575758	0.403509	0.729167	0.490196	0.608696	0
bin36	0.575337	0.620828	0.333333	0.536232	0.8	0.378205	0.875	0.857143	0.730159	0.68254	0.45	0.533333	0.773333	0.733333	0.825397	0.409091	0.888889	0.470588	0.876543	0.698413	0.446394	0.733333	0.454191	0.727273	0.962963	0.681944	0.437322	0.761905		0.651894	0.000248472	TURE	TURE	1800		bin36	0.222145	0.650794	0.398148	0.416667	0.540441	0.311111	0.16	0.515152	0.333333	0.708333	0.284314	0.57971	0.428571
bin37	0.714286	0.54059	0.433333	0.475397	0.777778	0.555556	0.910714	1	0.730159	0.722944	0.45873	0.533333	0.766667	0.733333	0.854762	0.396825	0.719577	0.459559	0.884501	0.746032	0.373366	0.816667	0.540441	0.833333	0.884259	0.8	0.530864	0.714286		0.67526	9.22936e-05	TURE	TURE	1850		bin37	0.112037	0.52381	0.391667	0.363636	0.541667	0.391304	0.152367	0.39899	0.438596	0.645833	0.347222	0.608696	0.428571
bin38	0.622222	0.518519	0.25	0.381975	0.731481	0.583333	1	1	0.757937	0.750361	0.451587	0.533333	0.717995	0.728205	0.884921	0.394444	0.5	0.488889	0.91657	0.749582	0.461538	0.816667	0.579657	0.909091	0.830159	0.844444	0.654321	0.650183		0.668122	8.47697e-05	TURE	TURE	1900		bin38	0.155952	0.52381	0	0.484848	0.539083	0.521739	0.114286	0.290909	0.526316	0.509722	0.349206	0.594203	0.337302
bin39	0.6	0.555556	0.333333	0.342968	0.583333	0.679293	1	1	0.7	0.761905	0.45	0.577778	0.689474	0.615385	0.854762	0.508772	0.533333	0.577778	0.869565	0.736842	0.527778	0.816667	0.733333	0.954545	0.666667	0.933333	0.679012	0.641026		0.675801	9.34659e-06	TURE	TURE	1950		bin39	0	0.547619	0	0.47619	0.6	0.484848	0.0877193	0.248148	0.526316	0.405983	0.43956	0.492063	0.5
bin40	0.672222	0.550245	0.111111	0.454545	0.384921	0.656566	1	1	0.7	0.79127	0.536062	0.622222	0.631579	0.538462	0.901587	0.561404	0.611111	0.642857	0.858903	0.666667	0.579762	0.75	0.885714	0.969697	0.444444	0.977778	0.765432	0.769231		0.679778	3.1263e-06	TURE	TURE	2000		bin40	0	0.461538	0	0.380952	0.5	0.545809	0.0965256	0.27381	0.526316	0.424242	0.461538	0.280702	0.333333
bin41	1	0.466667	0	0.533333	0.5	0.570707	1	1	0.7	0.847368	0.572304	0.622222	0.649123	0.568765	0.904762	0.631579	0.5	0.761905	0.847368	0.614035	0.84127	0.666667	0.924908	1	0.833333	1	0.716049	0.718531		0.713961	4.10507e-07	TURE	TURE	2050		bin41	0	0.350427	0	0.177778	0.52381	0.595861	0.0858586	0.142857	0.536062	0.363636	0.435897	0.272904	0.583333
bin42	1	0.428571	0	0.565476	0.5	0.563636	1	1	0.733333	0.816667	0.688889	0.6	0.666667	0.469697	0.873016	0.7154	0.166667	0.697802	0.769063	0.526316	1	0.633333	0.923077	0.984127	NaN	1	0.703704	0.644444		0.691477	8.45803e-06	TURE	TURE	2100		bin42	0	0.333333	0	0.416667	0.5	0.582353	0.0909091	0.180952	0.528322	0.363636	0.461538	0.294118	0.666667
bin43	NaN	0.404762	0	0.547619	0.833333	0.6	1	1	0.824561	0.8	0.833333	0.642857	0.616987	0.5	0.857143	0.823529	0	0.666667	0.759804	0.45098	1	0.616667	0.946581	0.915706	NaN	0.941176	0.703704	0.592593		0.687616	0.000141947	TURE	TURE	2150		bin43	0	0.30303	NaN	1	0.444444	0.418182	0.0333333	0.244444	0.529412	0.363636	0.542929	0.306373	0.666667
bin44	NaN	0.428571	NaN	0.611111	1	0.666667	1	1	0.813158	0.8	0.78022	0.652381	0.424242	0.515152	0.847118	0.823529	NaN	0.632479	0.773077	0.470588	1	0.55	1	0.87232	NaN	0.941176	0.703704	0.592593		0.745754	0.000225742	TURE	TURE	2200		bin44	0	0.322222	NaN	1	0.5	0.466667	0	0.333333	0.408088	0.333333	0.40303	0.333333	0.833333
bin45	NaN	0.428571	NaN	0.711111	1	0.6	1	1	0.684211	0.711404	0.755245	0.6	0.470034	0.666667	0.826797	0.823529	NaN	0.583333	0.684343	0.540441	NaN	0.55	1	0.873626	NaN	0.941176	0.705337	0.555556		0.726582	0.000644014	TURE	TURE	2250		bin45	0	0.37037	NaN	1	0.5	0.433333	0	0.111111	0.354167	0.233333	0.468254	0.298611	1
bin46	NaN	0.384615	NaN	0.783333	1	0.6	1	1	0.60039	0.649123	0.766667	0.698413	0.457672	0.812121	0.833333	0.792825	NaN	0.611111	0.575758	0.520833	NaN	0.583333	1	0.792929	NaN	0.936111	0.72	0.541667		0.724358	0.000118195	TURE	TURE	2300		bin46	0	0.444444	NaN	NaN	0	0.375	0	0	0.370833	0.148148	0.644444	0.365079	0.666667
bin47	NaN	0.369658	NaN	0.805556	NaN	0.6	NaN	1	0.58631	0.556645	0.8	0.666667	0.6	0.775758	0.852991	0.846154	NaN	0.527778	0.496633	0.466667	NaN	0.6	0.755556	0.744108	NaN	0.866667	0.693333	0.4		0.667166	6.48021e-05	TURE	TURE	2350		bin47	0	0.398148	NaN	NaN	0	0.541667	0	0	0.34127	0.126323	0.466667	0.388306	0
bin48	NaN	0.272727	NaN	0.555556	NaN	0.593939	NaN	1	0.52381	0.532026	0.7	0.586081	0.466667	0.727273	0.833333	0.832556	NaN	0.5	0.458333	0.5	1	0.561404	0.6	0.777778	NaN	0.836508	0.693333	0.75		0.65006	6.46809e-06	TURE	TURE	2400		bin48	0	0.315476	NaN	NaN	NaN	0.666667	0	0	0.357143	0.150794	0.261111	0.375758	0
bin49	NaN	0.324242	NaN	0.833333	NaN	0.5	NaN	1	0.530303	0.577778	0.62963	0.566667	0.5	0.818182	0.888889	0.845455	NaN	0.52381	0.420635	0.595238	1	0.561404	0.6	0.768519	NaN	0.690476	0.671111	0.777778		0.664702	0.000508815	TURE	TURE	2450		bin49	NaN	0.285714	NaN	NaN	NaN	0.714286	0	0	0.463869	0.133333	0.333333	0.4	0.75
bin50	NaN	0.4	NaN	1	NaN	0.5	NaN	NaN	0.5	0.564103	0.555556	0.6	0	0.792593	0.972222	0.9	NaN	0.533333	0.288889	0.595238	1	0.545924	0.5	0.708333	NaN	0.549451	0.68599	0.666667		0.6123	0.00112737	TURE	FALSE	2500		bin50	NaN	0.333333	NaN	NaN	NaN	0.571429	0	0	0.545455	0	0.377778	0.444444	NaN
AVE																																				AVE
SP HAP																																				SP HAP
CUED	S13	S14	S15	S16	S17	S18	S19	S20	S21	S22	S23	S24	S25	S26	S27	S28	S29	S31	S32	S33	S34	S35	S36	S37	S38	S39	S40	S41		AVE	T-test			time (ms)		UNCUED	S13	S14	S15	S16	S17	S18	S19	S20	S21	S22	S23	S24	S25
bin1	0.652778	0.555556	0.607843	0.55	0.409091	0.483871	0.588235	0.57971	0.473684	0.478261	0.176471	0.617918	0.577778	0.6875	0.555556	0.375	0.604167	0.619048	0.619048	0.411765	0.372549	0.666667	0.533333	0.52381	0.709091	0.473684	0.55	0.607843		0.537866	0.247392	FALSE	FALSE	50		bin1	0.45098	0.4	0.6	0.4	0.509804	0.555556	0.454545	0.714286	0.6	0.529412	0.594203	0.577778	0.409091
bin2	0.667075	0.555556	0.54902	0.5	0.409091	0.483871	0.588235	0.507246	0.473684	0.478261	0.176471	0.636364	0.577778	0.6875	0.546841	0.375	0.625	0.571429	0.634921	0.411765	0.27451	0.684211	0.5	0.52381	0.7	0.473684	0.55	0.705882		0.530972	0.352829	FALSE	FALSE	100		bin2	0.448529	0.4	0.621053	0.4	0.5	0.555556	0.454545	0.714286	0.6	0.529412	0.552042	0.555556	0.409091
bin3	0.667075	0.555556	0.529412	0.5	0.454545	0.483871	0.588235	0.478261	0.482456	0.478261	0.196078	0.636364	0.555556	0.6875	0.557734	0.375	0.625	0.56044	0.68254	0.411765	0.294118	0.684211	0.452381	0.571429	0.533333	0.473684	0.55	0.686275		0.526824	0.386622	FALSE	FALSE	150		bin3	0.420343	0.428571	0.583333	0.433333	0.5	0.555556	0.454545	0.690476	0.590476	0.529412	0.545455	0.533333	0.409091
bin4	0.693627	0.578947	0.529412	0.5	0.5	0.505376	0.588235	0.514493	0.5	0.478261	0.235294	0.652174	0.533333	0.6875	0.588235	0.383333	0.625	0.538462	0.698413	0.411765	0.313725	0.684211	0.419048	0.539683	0.530303	0.473684	0.55	0.647059		0.532128	0.247682	FALSE	FALSE	200		bin4	0.448529	0.428571	0.552632	0.45	0.462963	0.555556	0.454545	0.642857	0.539683	0.529412	0.545455	0.488889	0.409091
bin5	0.653186	0.631579	0.529412	0.5	0.5	0.537634	0.588235	0.515152	0.5	0.478261	0.235294	0.662055	0.533333	0.6875	0.716912	0.4	0.645833	0.564103	0.730159	0.411765	0.352941	0.684211	0.47619	0.533333	0.563636	0.421053	0.566667	0.843137		0.552199	0.350994	FALSE	FALSE	250		bin5	0.39311	0.442857	0.616667	0.45	0.444444	0.62963	0.469697	0.642857	0.555556	0.529412	0.584416	0.488889	0.409091
bin6	0.653186	0.649123	0.490196	0.533333	0.545455	0.623656	0.686275	0.545455	0.5	0.521739	0.235294	0.772727	0.533333	0.6875	0.816176	0.4	0.708333	0.820513	0.666667	0.411765	0.352941	0.684211	0.533333	0.7	0.6	0.473684	0.633333	0.980392		0.598522	0.564793	FALSE	FALSE	300		bin6	0.352941	0.45	0.65	0.516667	0.592593	0.666667	0.5	0.642857	0.571429	0.588235	0.590909	0.642857	0.409091
bin7	0.587719	0.678363	0.588235	0.55	0.848485	0.645161	0.705882	0.581028	0.508772	0.652174	0.235294	0.878788	0.563889	0.6875	0.856618	0.375	0.6875	0.928571	0.730159	0.431373	0.375	0.684211	0.541667	0.866667	0.866667	0.701754	0.65	1		0.657374	0.291769	FALSE	FALSE	350		bin7	0.384532	0.46746	0.725397	0.55	0.814815	0.666667	0.530303	0.619048	0.603175	0.588235	0.596838	0.714286	0.393939
bin8	0.625	0.660131	0.666667	0.683333	0.939394	0.645161	0.705882	0.594203	0.561404	0.695652	0.254902	0.910408	0.625	0.6875	0.833333	0.458333	0.645833	0.953968	0.936508	0.588235	0.333333	0.684211	0.5875	0.933333	0.9	0.981481	0.7	1		0.706811	0.324384	FALSE	FALSE	400		bin8	0.422658	0.492063	0.857143	0.55	0.925926	0.666667	0.545455	0.595238	0.672222	0.588235	0.652174	0.761905	0.439394
bin9	0.632353	0.672515	0.823529	0.783333	1	0.634409	0.705882	0.583333	0.631579	0.73913	0.285539	0.913043	0.625	0.6875	0.833333	0.5	0.645833	1	1	0.647059	0.285539	0.701754	0.601786	0.95	0.906061	1	0.7	1		0.731733	0.313203	FALSE	FALSE	450		bin9	0.416667	0.555556	0.952381	0.583333	0.944444	0.666667	0.590909	0.571429	0.666667	0.607843	0.695652	0.857143	0.409091
bin10	0.626407	0.672923	0.862745	0.815385	1	0.591867	0.693627	0.675	0.670844	0.832298	0.298611	0.822981	0.575	0.689103	0.80543	0.541667	0.605769	0.966667	1	0.660131	0.259427	0.685805	0.666667	0.907692	0.936364	1	0.711111	1		0.734769	0.557972	FALSE	FALSE	500		bin10	0.38515	0.603175	0.938889	0.64386	0.962963	0.652778	0.560606	0.613757	0.655556	0.735294	0.697101	0.89127	0.465648
bin11	0.589286	0.766622	0.676471	0.85	1	0.631098	0.703922	0.634058	0.693756	0.855512	0.410714	0.794409	0.681878	0.640278	0.885621	0.589209	0.654487	0.95	1	0.616558	0.313317	0.605363	0.673882	0.913725	0.872727	1	0.676984	1		0.738567	0.657955	FALSE	FALSE	550		bin11	0.406746	0.516667	0.966667	0.666082	0.923611	0.777778	0.61544	0.697192	0.680799	0.676471	0.725543	0.84127	0.427706
bin12	0.632353	0.731969	0.823529	0.8	1	0.612903	0.647059	0.685386	0.684211	0.869565	0.333333	0.782609	0.652778	0.6875	0.833333	0.5625	0.625	0.888889	1	0.647059	0.294118	0.526316	0.666667	0.9	0.90303	1	0.633333	1		0.729409	0.656888	FALSE	FALSE	600		bin12	0.39951	0.571429	0.983333	0.666667	1	0.666667	0.590909	0.624542	0.777778	0.764706	0.753623	0.928571	0.454545
bin13	0.673611	0.716776	0.764706	0.85	1	0.612903	0.588235	0.75	0.684211	0.884058	0.333333	0.768116	0.666667	0.6875	0.87037	0.533333	0.645833	0.875	1	0.647059	0.333333	0.536062	0.6875	0.9	0.909091	1	0.592982	0.980392		0.731824	0.329849	FALSE	FALSE	650		bin13	0.39951	0.539683	0.948246	0.65	1	0.666667	0.590909	0.666667	0.84127	0.764706	0.73913	0.880952	0.454545
bin14	0.666667	0.673203	0.764706	0.85	1	0.612903	0.588235	0.722222	0.649123	0.913043	0.333333	0.735178	0.644444	0.6875	0.884532	0.604167	0.6875	0.875	1	0.666667	0.294118	0.54386	0.666667	0.866667	0.90303	1	0.578947	0.980392		0.728289	0.199002	FALSE	FALSE	700		bin14	0.331349	0.47619	0.868254	0.633333	1	0.592593	0.575758	0.769231	0.825397	0.764706	0.80303	0.785714	0.454545
bin15	0.6	0.678363	0.72549	0.833333	0.984848	0.591398	0.588235	0.736111	0.631579	0.913043	0.381944	0.727273	0.673611	0.6875	0.884532	0.666667	0.6875	0.791667	0.968254	0.705882	0.27451	0.508772	0.673611	0.8	0.90303	1	0.631579	1		0.723169	0.178483	FALSE	FALSE	750		bin15	0.317647	0.47619	0.847368	0.65	1	0.666667	0.530303	0.820513	0.825397	0.764706	0.787879	0.785714	0.454545
bin16	0.588235	0.649123	0.651961	0.833333	0.909091	0.569892	0.588235	0.736111	0.631579	0.913043	0.4375	0.710145	0.650794	0.6875	0.888889	0.631944	0.666667	0.738889	0.761905	0.705882	0.349265	0.473684	0.604167	0.683333	0.842424	0.862745	0.616667	1		0.69225	0.109722	FALSE	FALSE	800		bin16	0.372549	0.428571	0.789474	0.65	0.941176	0.666667	0.469697	0.769231	0.787302	0.698529	0.772727	0.70696	0.454545
bin17	0.571078	0.614035	0.583333	0.603509	0.80303	0.569892	0.588235	0.666667	0.528265	0.826087	0.480392	0.57971	0.619048	0.6875	0.851852	0.449755	0.68254	0.733333	0.492063	0.686275	0.395833	0.473684	0.4375	0.5	0.785185	0.686275	0.55	1		0.623038	0.371647	FALSE	FALSE	850		bin17	0.431373	0.396825	0.736355	0.65	0.901961	0.652778	0.454545	0.75641	0.607143	0.5	0.757576	0.692308	0.380952
bin18	0.612745	0.561404	0.5625	0.54386	0.757576	0.565233	0.588235	0.555556	0.491228	0.681159	0.455556	0.536232	0.642857	0.6875	0.796296	0.352941	0.619048	0.688889	0.412698	0.607843	0.416667	0.473684	0.428922	0.383333	0.533333	0.647059	0.55	1		0.57687	0.424466	FALSE	FALSE	900		bin18	0.509804	0.396825	0.703704	0.533333	0.862745	0.625	0.454545	0.641026	0.47619	0.5	0.698413	0.74359	0.380952
bin19	0.647059	0.526316	0.5625	0.508772	0.69697	0.566667	0.588235	0.486111	0.385965	0.637681	0.4	0.550725	0.571429	0.625	0.703704	0.294118	0.595238	0.6	0.393651	0.588235	0.479167	0.508772	0.448529	0.35	0.5	0.623094	0.55	0.960784		0.548169	0.414955	FALSE	FALSE	950		bin19	0.459559	0.365079	0.636452	0.466667	0.823529	0.625	0.454545	0.568376	0.492063	0.4375	0.634921	0.732601	0.380952
bin20	0.608333	0.526316	0.625	0.473684	0.606061	0.544444	0.588235	0.402778	0.421053	0.608696	0.333333	0.536232	0.571429	0.625	0.611111	0.294118	0.571429	0.583578	0.383333	0.588235	0.5	0.526316	0.479085	0.35	0.566667	0.603486	0.55	0.882353		0.534297	0.224646	FALSE	FALSE	1000		bin20	0.425	0.333333	0.617131	0.4	0.826797	0.666667	0.46176	0.583333	0.460317	0.375	0.606349	0.642857	0.380952
bin21	0.616667	0.5	0.624288	0.526936	0.535095	0.494253	0.555465	0.364308	0.46416	0.545455	0.297009	0.523265	0.56044	0.625	0.58168	0.257761	0.580952	0.624288	0.296172	0.544725	0.5625	0.526316	0.466387	0.311111	0.471958	0.557734	0.529605	0.898284		0.515779	0.363185	FALSE	FALSE	1050		bin21	0.389744	0.355556	0.684764	0.420211	0.749288	0.833333	0.442857	0.575397	0.395503	0.375	0.606349	0.6337	0.391223
bin22	0.625214	0.540635	0.510989	0.573465	0.530303	0.497744	0.588235	0.403727	0.405702	0.514493	0.31746	0.505556	0.60878	0.5625	0.647817	0.336142	0.568376	0.611111	0.195532	0.490196	0.638462	0.528788	0.421212	0.276768	0.448148	0.541991	0.465635	0.860029		0.507679	0.348962	FALSE	FALSE	1100		bin22	0.412088	0.305263	0.597864	0.35	0.698257	0.672222	0.46176	0.677778	0.392648	0.375	0.612073	0.523932	0.330065
bin23	0.638889	0.526316	0.5625	0.578947	0.5	0.506173	0.568627	0.391304	0.421053	0.507246	0.307692	0.500659	0.533333	0.5625	0.576253	0.284967	0.571429	0.611111	0.2	0.470588	0.529412	0.526316	0.45098	0.240741	0.454545	0.583878	0.491228	0.879902		0.499164	0.393867	FALSE	FALSE	1150		bin23	0.383333	0.338889	0.537094	0.35	0.685185	0.75	0.454545	0.666667	0.444444	0.375	0.65	0.619048	0.365079
bin24	0.625	0.561404	0.604167	0.6	0.5	0.511494	0.529412	0.391304	0.368421	0.478261	0.324176	0.462451	0.533333	0.5625	0.509804	0.294118	0.580952	0.589669	0.166667	0.470588	0.529412	0.54386	0.431373	0.25	0.454545	0.574074	0.5	0.901961		0.494605	0.384092	FALSE	FALSE	1200		bin24	0.427696	0.365079	0.545809	0.35	0.703704	0.666667	0.454545	0.666667	0.47619	0.375	0.514954	0.642857	0.365079
bin25	0.625	0.578947	0.666667	0.6	0.5	0.517241	0.529412	0.376812	0.368421	0.478261	0.245421	0.454545	0.533333	0.5	0.5	0.294118	0.6	0.561404	0.15	0.470588	0.470588	0.578947	0.395833	0.233333	0.454545	0.555556	0.5	0.901961		0.487176	0.405039	FALSE	FALSE	1250		bin25	0.470588	0.412698	0.568764	0.35	0.666667	0.62963	0.454545	0.666667	0.52381	0.333333	0.42885	0.642857	0.365079
bin26	0.580952	0.578947	0.659722	0.566667	0.484848	0.532616	0.529412	0.347826	0.350877	0.376812	0.285714	0.454545	0.533333	0.456944	0.395425	0.294118	0.555556	0.491228	0.1	0.45098	0.490196	0.578947	0.4	0.2	0.454545	0.555556	0.5	0.921569		0.468833	0.523949	FALSE	FALSE	1300		bin26	0.470588	0.492063	0.539352	0.316667	0.666667	0.666667	0.424242	0.611111	0.507937	0.3125	0.414035	0.6	0.380952
bin27	0.544643	0.607212	0.622222	0.583333	0.378788	0.521864	0.588235	0.293149	0.350877	0.231884	0.228571	0.424242	0.555556	0.520833	0.238971	0.294118	0.533333	0.481481	0.116667	0.352941	0.568627	0.578947	0.368627	0.166667	0.454545	0.388889	0.5	0.921569		0.443457	0.605521	FALSE	FALSE	1350		bin27	0.509804	0.52381	0.392157	0.3	0.62963	0.666667	0.396825	0.615385	0.444444	0.333333	0.378788	0.555556	0.396825
bin28	0.533333	0.588235	0.534921	0.6	0.333333	0.548387	0.647059	0.292929	0.368421	0.217391	0.357143	0.409091	0.531944	0.6875	0.137255	0.207598	0.533333	0.444444	0.166667	0.313725	0.627451	0.561404	0.470588	0.2	0.454545	0.240741	0.4	0.714461		0.432925	0.164596	FALSE	FALSE	1400		bin28	0.697168	0.47619	0.22658	0.3	0.5	0.666667	0.333333	0.615385	0.31746	0.3125	0.15873	0.41746	0.333333
bin29	0.477778	0.588235	0.480392	0.566667	0.348485	0.483871	0.647059	0.268031	0.438596	0.231884	0.5	0.393939	0.531944	0.6875	0.117647	0.2	0.6	0.407407	0.2	0.27451	0.539216	0.403509	0.45098	0.2	0.454545	0.166667	0.277193	0.645833		0.413639	0.23507	FALSE	FALSE	1450		bin29	0.703704	0.47619	0.170966	0.216667	0.444444	0.62963	0.333333	0.615385	0.222222	0.333333	0.285714	0.428571	0.365079
bin30	0.38848	0.641612	0.490196	0.533333	0.409091	0.483871	0.647059	0.314815	0.473684	0.275362	0.474359	0.439394	0.533333	0.6875	0.206972	0.2	0.622222	0.425926	0.333333	0.294118	0.583333	0.403509	0.395833	0.266667	0.545455	0.166667	0.245614	0.625		0.432384	0.1256	FALSE	FALSE	1500		bin30	0.633987	0.47619	0.21978	0.3	0.481481	0.555556	0.333333	0.487179	0.269841	0.4375	0.270677	0.357143	0.349206
bin31	0.346405	0.518519	0.686275	0.4	0.424242	0.522222	0.705882	0.455338	0.473684	0.362319	0.5	0.424242	0.543056	0.6875	0.277778	0.2	0.68254	0.537037	0.533333	0.27451	0.520833	0.421053	0.395833	0.316667	0.606061	0.166667	0.233333	0.625		0.458583	0.0598263	FALSE	FALSE	1550		bin31	0.555556	0.380952	0.307692	0.516667	0.425926	0.518519	0.31746	0.358974	0.285714	0.5	0.280702	0.285714	0.301587
bin32	0.333333	0.444444	0.814624	0.433333	0.530303	0.534127	0.843137	0.640523	0.508772	0.623188	0.538462	0.575758	0.533333	0.6875	0.388889	0.2125	0.714286	0.62963	0.65	0.470588	0.413889	0.421053	0.539216	0.316667	0.69697	0.222222	0.25	0.5		0.51667	0.00581213	TURE	FALSE	1600		bin32	0.489107	0.22619	0.187179	0.566667	0.444444	0.5	0.311905	0.316084	0.285714	0.702778	0.345614	0.309524	0.238095
bin33	0.462963	0.436647	0.807204	0.4	0.607143	0.604938	0.882353	0.711538	0.596491	0.710145	0.525641	0.590909	0.644444	0.75	0.592593	0.229167	0.777778	0.54386	0.75	0.529412	0.430037	0.421053	0.520833	0.373684	0.875758	0.296296	0.283333	0.541667		0.56771	0.00062745	TURE	TURE	1650		bin33	0.238889	0.257937	0.225	0.578947	0.372549	0.5	0.3	0.193939	0.333333	0.755556	0.25	0.371429	0.25
bin34	0.392157	0.421053	0.762821	0.421053	0.696881	0.679012	0.879902	0.788462	0.631579	0.797101	0.649573	0.5	0.711111	0.75	0.703704	0.375	0.817172	0.592982	0.8	0.588235	0.416667	0.473684	0.519608	0.508772	1	0.277778	0.283333	0.466667		0.603725	0.000185923	TURE	TURE	1700		bin34	0.147009	0.283333	0.375	0.607212	0.411765	0.375	0.277778	0.251515	0.516667	0.711111	0.311905	0.409524	0.210916
bin35	0.482143	0.473684	0.759259	0.421053	0.720479	0.666667	0.875	0.75	0.631579	0.797101	0.659341	0.5	0.711111	0.716667	0.777778	0.4375	0.9	0.631579	0.916667	0.588235	0.484848	0.421053	0.627451	0.614035	1	0.222222	0.333333	0.34127		0.623573	0.000484978	TURE	TURE	1750		bin35	0.153846	0.343651	0.345238	0.640523	0.490196	0.375	0.173203	0.347222	0.566667	0.688889	0.5	0.531944	0.333333
bin36	0.538462	0.508772	0.675926	0.501032	0.766667	0.646384	0.82735	0.666667	0.631579	0.826087	0.690476	0.5	0.742857	0.577778	0.777778	0.625	1	0.643275	0.95	0.686275	0.574074	0.473684	0.705882	0.824561	0.916667	0.351852	0.366667	0.452381		0.658862	6.52547e-05	TURE	TURE	1800		bin36	0.277778	0.412698	0.206349	0.564103	0.470588	0.375	0.1875	0.52381	0.5	0.733333	0.517544	0.575	0.409314
bin37	0.598485	0.526316	0.5	0.552778	0.863492	0.659004	0.691667	0.667677	0.649123	0.808959	0.68254	0.468975	0.804029	0.6	0.759259	0.75	1	0.703704	1	0.647059	0.625	0.537037	0.72549	0.894737	1	0.481481	0.516667	0.642857		0.691298	3.7826e-05	TURE	TURE	1850		bin37	0.333333	0.460317	0.305556	0.538462	0.490278	0.375	0.210852	0.647619	0.566667	0.733333	0.585965	0.666667	0.488889
bin38	0.462963	0.526316	0.5	0.518376	0.807977	0.609195	0.857143	0.716667	0.526316	0.757576	0.711111	0.507937	0.769231	0.628571	0.777778	0.8	1	0.648148	1	0.604167	0.565476	0.592593	0.693627	0.894737	1	0.648148	0.6	0.714286		0.694226	0.000201963	TURE	TURE	1900		bin38	0.616667	0.492063	0.666667	0.512821	0.392735	0.255952	0.277778	0.666667	0.6	0.644444	0.533333	0.666667	0.619048
bin39	0.387302	0.537037	0.47619	0.355556	0.75	0.616174	0.849206	0.644444	0.561404	0.722944	0.768254	0.587302	0.692308	0.642857	0.777778	0.933333	1	0.666667	1	0.666667	0.52381	0.537037	0.729167	0.894737	0.666667	0.703704	0.6	0.600733		0.674688	0.000410123	TURE	TURE	1950		bin39	0.7	0.533333	0.666667	0.429487	0.3	0.238095	0.138889	0.533333	0.634921	0.511111	0.5	0.666667	0.71312
bin40	0.277778	0.604575	0.3	0.234127	0.730159	0.597443	1	0.5	0.631579	0.698413	0.85348	0.616667	0.67366	0.68315	0.777778	0.885714	0.833333	0.629167	1	0.673611	0.588889	0.462963	0.704545	0.856618	0	0.796296	0.65	0.618687		0.638523	0.0127341	TURE	FALSE	2000		bin40	0.611111	0.65	0.666667	0.39596	0.505291	0.238095	0.0939394	0.25	0.68254	0.444444	0.55	0.571429	0.709091
bin41	0	0.67402	0	0.188889	0.616667	0.480532	1	1	0.596491	0.634921	0.871795	0.62193	0.636364	0.75	0.777778	0.857143	0.5	0.534921	1	0.628571	0.616667	0.462963	0.727273	0.863492	0	0.833333	0.7	0.622222		0.614142	0.0364396	TURE	FALSE	2050		bin41	0	0.763158	0.666667	0.25	0.888889	0.380952	0.0666667	0.194444	0.714286	0.4	0.566667	0.52381	0.777778
bin42	1	0.738971	0	0.333333	0.75	0.466044	1	1	0.578947	0.531746	0.733333	0.759259	0.511785	0.777778	0.764161	0.832556	0.5	0.641026	1	0.667277	0.583333	0.555556	0.686869	0.85348	NaN	0.839461	0.766667	0.666667		0.686602	0.00257958	TURE	FALSE	2100		bin42	0	0.699074	0.5	0.31746	1	0.428571	0	0	0.666667	0.380952	0.583333	0.551282	0.777778
bin43	1	0.661111	NaN	0.52381	0.722222	0.470356	0.916667	1	0.54386	0.54386	0.603704	0.777778	0.529101	0.828283	0.8125	0.818182	0.833333	0.675214	1	0.75	0.666667	0.555556	0.722222	0.846154	NaN	0.851389	0.8	0.666667		0.735332	7.6502e-05	TURE	TURE	2150		bin43	0	0.6875	0.5	0.4	1	0.507937	0	0	0.599415	0.285714	0.440351	0.581197	0.555556
bin44	NaN	0.5	NaN	0.766667	0.555556	0.445887	0.722222	1	0.54386	0.578947	0.625	0.777778	0.47619	0.781818	0.8125	0.909091	1	0.666667	1	0.623932	0.75	0.537037	0.710317	0.794872	NaN	0.866667	0.829825	0.555556		0.713216	0.00154595	TURE	FALSE	2200		bin44	0	0.723611	0.833333	0.5	1	0.68254	0	0	0.5	0.238095	0.345316	0.666667	0.607143
bin45	0	0.566667	NaN	0.711111	0.5	0.475397	0.666667	1	0.614035	0.584186	0.607143	0.753704	0.355556	0.772727	0.804167	0.899327	1	0.618687	1	0.553419	0.75	0.555556	0.666667	0.742424	NaN	0.790476	0.77193	0.5		0.66384	0.000342253	TURE	TURE	2250		bin45	0	0.726984	1	0.611111	0.666667	0.666667	0	0	0.303922	0.123016	0.288889	0.707071	0.392857
bin46	0	0.555556	NaN	0.333333	0.5	0.491228	1	1	0.672515	0.692674	0.571429	0.733333	0.5	0.8	0.866667	0.851852	NaN	0.636364	1	0.583333	0.777778	0.555556	0.722222	0.812121	NaN	0.826007	0.719298	0.4		0.664051	0.000105332	TURE	TURE	2300		bin46	0	0.826007	1	0.555556	0	0.611111	0	0	0.166667	0.0883838	0.3125	0.606061	0.166667
bin47	0	0.555556	NaN	0	1	0.45614	1	1	0.705202	0.74359	0.571429	0.733333	0.583333	0.792593	0.831013	0.666667	NaN	0.545455	1	0.558081	1	0.584967	0.811111	0.768519	NaN	0.837607	0.649123	0.4		0.671749	5.2245e-05	TURE	TURE	2350		bin47	0	0.794872	1	0	0	0.666667	0	0	0.125	0.103704	0.31746	0.545455	0
bin48	0	0.560185	NaN	0	NaN	0.497743	1	NaN	0.75	0.880808	0.571429	0.75641	0.611111	0.962963	0.770163	0.666667	NaN	0.530303	1	0.381313	1	0.627451	0.8	0.583333	NaN	0.823232	0.589669	0.266667		0.636063	0.000109945	TURE	TURE	2400		bin48	0	0.769231	1	0	NaN	0.644444	0	0	0.125	0.12037	0.350427	0.363636	0
bin49	NaN	0.571429	NaN	0	NaN	0.488889	1	NaN	0.803571	0.873677	0.579365	0.75	0.333333	1	0.851852	0.708333	NaN	0.4	1	0.343434	NaN	0.568627	0.8	0.5	NaN	0.798653	0.615468	0.555556		0.644866	0.000131872	TURE	TURE	2450		bin49	0	0.716667	0.833333	0	NaN	0.6	0	0	0.0588235	0.285714	0.414815	0.366667	0
bin50	NaN	0.571429	NaN	0	NaN	0.674603	NaN	NaN	0.867521	0.84127	0.666667	0.69697	0.666667	1	0.875	0.571429	NaN	0.222222	1	0.322222	NaN	0.481481	0.8	0.666667	NaN	0.777778	0.627451	0.666667		0.649802	0.000322533	TURE	TURE	2500		bin50	0	0.622222	0.5	NaN	NaN	0.588889	0	0	0.0638889	0.466667	0.444444	0.333333	0
AVE																																				AVE
SP DIS																																				SP DIS
CUED	S13	S14	S15	S16	S17	S18	S19	S20	S21	S22	S23	S24	S25	S26	S27	S28	S29	S31	S32	S33	S34	S35	S36	S37	S38	S39	S40	S41		AVE	T-test			time (ms)		UNCUED	S13	S14	S15	S16	S17	S18	S19	S20	S21	S22	S23	S24	S25
bin1	0.452381	0.5	0.422222	0.47619	0.294118	0.409091	0.578947	0.466667	0.52381	0.478261	0.304348	0.479167	0.529412	0.48	0.7	0.5	0.611111	0.574074	0.62963	0.565217	0.421053	0.736842	0.272727	0.416667	0.478261	0.666667	0.478261	0.298246		0.490835	0.799582	FALSE	FALSE	50		bin1	0.457895	0.555556	0.571429	0.491228	0.681159	0.611111	0.45	0.383333	0.592593	0.5	0.588235	0.449275	0.428571
bin2	0.52381	0.5	0.466667	0.47619	0.294118	0.409091	0.578947	0.466667	0.52381	0.478261	0.333333	0.5	0.529412	0.453333	0.7	0.5	0.574074	0.555556	0.611111	0.565217	0.409357	0.614035	0.272727	0.35	0.521739	0.615385	0.471618	0.350877		0.487333	0.69351	FALSE	FALSE	100		bin2	0.456863	0.555556	0.587302	0.421053	0.681159	0.611111	0.45	0.421053	0.537037	0.5	0.588235	0.521739	0.428571
bin3	0.575397	0.5	0.488889	0.47619	0.294118	0.409091	0.578947	0.466667	0.477633	0.478261	0.347826	0.5	0.529412	0.48	0.7	0.5	0.555556	0.536062	0.518519	0.565217	0.351852	0.614035	0.272727	0.3	0.521739	0.615385	0.513889	0.45614		0.486555	0.993984	FALSE	FALSE	150		bin3	0.498693	0.555556	0.619048	0.421053	0.652174	0.611111	0.45	0.491228	0.555556	0.5	0.588235	0.521739	0.428571
bin4	0.583333	0.5	0.555556	0.47619	0.294118	0.409091	0.578947	0.466667	0.454545	0.478261	0.38274	0.5	0.529412	0.48	0.7	0.537037	0.555556	0.526316	0.518519	0.565217	0.277778	0.684211	0.272727	0.35	0.478261	0.624542	0.555556	0.508772		0.494405	0.890541	FALSE	FALSE	200		bin4	0.536062	0.555556	0.650794	0.421053	0.652174	0.611111	0.45	0.444444	0.588235	0.5	0.588235	0.565217	0.428571
bin5	0.583333	0.5	0.792063	0.47619	0.294118	0.409091	0.578947	0.466667	0.484848	0.492754	0.409091	0.5625	0.509804	0.48	0.733333	0.563353	0.5	0.711501	0.537037	0.565217	0.222222	0.684211	0.287879	0.583333	0.478261	0.642857	0.588889	0.631579		0.527467	0.94296	FALSE	FALSE	250		bin5	0.517544	0.555556	0.813158	0.45614	0.652174	0.648148	0.45	0.425926	0.588235	0.5	0.588235	0.5	0.452381
bin6	0.583333	0.5	0.785714	0.52381	0.372549	0.5	0.684211	0.533333	0.560606	0.521739	0.409091	0.729167	0.509804	0.466667	0.883333	0.526316	0.555556	0.925926	0.611111	0.565217	0.266082	0.684211	0.354257	0.7	0.463768	0.642857	0.666667	0.842105		0.584551	0.789534	FALSE	FALSE	300		bin6	0.455637	0.555556	0.777778	0.561404	0.710145	0.703704	0.5	0.537037	0.633987	0.5	0.588235	0.536232	0.628571
bin7	0.641026	0.579365	0.85348	0.612698	0.72549	0.560606	0.684211	0.577778	0.606061	0.608696	0.397233	0.8125	0.529412	0.44	0.9	0.561404	0.555556	1	0.796296	0.565217	0.446394	0.684211	0.515873	0.733333	0.57971	0.785714	0.76	0.947368		0.659273	0.659721	FALSE	FALSE	350		bin7	0.517544	0.555556	0.80284	0.578947	0.913043	0.722222	0.6	0.481481	0.666667	0.5625	0.583578	0.550725	0.60989
bin8	0.723193	0.666667	1	0.683333	0.980392	0.651515	0.684211	0.6	0.666667	0.637681	0.376812	0.75	0.529412	0.453333	0.9	0.561404	0.574074	1	0.888889	0.565217	0.462963	0.649123	0.569264	0.766667	0.811594	0.928571	0.746667	1		0.70813	0.481231	FALSE	FALSE	400		bin8	0.589669	0.574074	0.898246	0.631579	1	0.722222	0.65	0.555556	0.62963	0.645833	0.6	0.594203	0.615385
bin9	0.837607	0.714286	1	0.716667	1	0.727273	0.684211	0.6	0.681818	0.710145	0.376812	0.8125	0.509804	0.48	1	0.596491	0.648148	0.966667	0.907407	0.565217	0.480392	0.631579	0.552042	0.666667	0.855072	0.97619	0.72	1		0.729178	0.627769	FALSE	FALSE	450		bin9	0.563353	0.62963	0.866667	0.684211	1	0.777778	0.65	0.537037	0.666667	0.75	0.628571	0.710145	0.615385
bin10	0.814815	0.690043	1	0.722222	1	0.766234	0.716959	0.537374	0.758297	0.794357	0.382751	0.862408	0.520833	0.479444	1	0.597953	0.677778	0.918254	0.925926	0.601104	0.422348	0.611529	0.566382	0.62381	0.87971	1	0.771703	1		0.737223	0.554907	FALSE	FALSE	500		bin10	0.54793	0.632353	0.860999	0.661269	1	0.814161	0.629412	0.5561	0.748677	0.791667	0.657509	0.752013	0.576923
bin11	0.867521	0.76912	1	0.772417	1	0.665368	0.650629	0.583104	0.727273	0.693929	0.333333	0.723214	0.457952	0.486087	1	0.576441	0.689815	0.901852	0.840741	0.538406	0.381481	0.643275	0.62209	0.637146	0.946546	1	0.631515	1		0.719259	0.323937	FALSE	FALSE	550		bin11	0.566784	0.707516	0.830702	0.713364	1	0.740741	0.760526	0.569989	0.660131	0.796759	0.63024	0.73706	0.74359
bin12	0.823232	0.727273	1	0.753968	1	0.681818	0.666667	0.5625	0.772727	0.73913	0.409091	0.8125	0.470588	0.48	1	0.614035	0.685185	0.9	0.888889	0.57971	0.483333	0.578947	0.575758	0.566667	0.956522	1	0.653333	1		0.727924	0.81025	FALSE	FALSE	600		bin12	0.536062	0.722222	0.884921	0.684211	1	0.777778	0.616667	0.546841	0.666667	0.8125	0.642857	0.782609	0.583333
bin13	0.823232	0.727273	1	0.746032	1	0.681818	0.631579	0.583333	0.742424	0.73913	0.369408	0.8125	0.490196	0.48	1	0.614035	0.666667	0.906205	0.851852	0.608696	0.385965	0.596491	0.545455	0.55	0.985507	1	0.6	0.964912		0.717954	0.486406	FALSE	FALSE	650		bin13	0.54386	0.722222	0.903175	0.631579	1	0.777778	0.583333	0.529412	0.685185	0.854167	0.636508	0.782609	0.583333
bin14	0.818182	0.727273	1	0.68254	1	0.666667	0.631579	0.625	0.69697	0.73913	0.391053	0.8125	0.509804	0.48	1	0.473684	0.666667	0.777778	0.833333	0.608696	0.385965	0.578947	0.602767	0.55	0.985507	1	0.56	0.964912		0.706034	0.602426	FALSE	FALSE	700		bin14	0.526316	0.722222	0.903175	0.684211	1	0.777778	0.5	0.470588	0.722222	0.875	0.631944	0.782609	0.636364
bin15	0.832556	0.727273	1	0.650794	1	0.636364	0.631579	0.645833	0.636364	0.73913	0.386508	0.75	0.470588	0.48	1	0.473684	0.611111	0.761905	0.833333	0.608696	0.444444	0.596491	0.565217	0.561404	0.913043	0.977778	0.56	0.963938		0.69493	0.665612	FALSE	FALSE	750		bin15	0.526316	0.722222	0.903175	0.719298	1	0.759259	0.5	0.411765	0.666667	0.875	0.5875	0.782609	0.636364
bin16	0.777778	0.650794	0.958333	0.507937	0.921569	0.636364	0.561404	0.6875	0.590909	0.724638	0.35	0.8125	0.411765	0.48	1	0.473684	0.555556	0.68254	0.777778	0.608696	0.387622	0.631579	0.536232	0.526316	0.913043	0.833333	0.546667	0.907407		0.658998	0.908397	FALSE	FALSE	800		bin16	0.536062	0.685185	0.877611	0.736842	1	0.722222	0.5	0.411765	0.648148	0.869444	0.566667	0.73913	0.636364
bin17	0.730769	0.555556	0.716667	0.466667	0.784314	0.606061	0.526316	0.583333	0.530303	0.565217	0.35614	0.770833	0.431373	0.466667	0.916667	0.421053	0.555556	0.587302	0.517429	0.608696	0.464912	0.631579	0.513626	0.45614	0.84058	0.729167	0.479444	0.833333		0.594489	0.716336	FALSE	FALSE	850		bin17	0.592982	0.611111	0.804094	0.648148	0.955863	0.722222	0.466667	0.418129	0.574074	0.866667	0.590476	0.57971	0.454545
bin18	0.750916	0.507937	0.657576	0.460317	0.666667	0.575758	0.526316	0.490278	0.454545	0.492754	0.351852	0.6875	0.392157	0.48	0.744737	0.438596	0.588235	0.587302	0.411765	0.594203	0.410331	0.631579	0.45614	0.368421	0.637681	0.6875	0.444444	0.833333		0.547459	0.625685	FALSE	FALSE	900		bin18	0.507937	0.546841	0.753968	0.555556	0.924242	0.607843	0.45	0.461874	0.481481	0.733333	0.569963	0.594203	0.454545
bin19	0.657509	0.47619	0.6	0.507937	0.588235	0.577922	0.526316	0.395833	0.378788	0.449275	0.388889	0.645833	0.431373	0.48	0.620175	0.473684	0.588235	0.539683	0.294118	0.565217	0.333333	0.596491	0.400668	0.298246	0.594203	0.666667	0.416667	0.833333		0.511601	0.621794	FALSE	FALSE	950		bin19	0.491228	0.377996	0.725397	0.555556	0.909091	0.588235	0.45	0.470588	0.5	0.511111	0.538462	0.536232	0.454545
bin20	0.6337	0.47619	0.533333	0.52381	0.509804	0.571429	0.517544	0.375	0.439394	0.434783	0.403509	0.541667	0.420343	0.48	0.557895	0.473684	0.588235	0.52381	0.294118	0.565217	0.389692	0.596491	0.439394	0.280702	0.471014	0.6875	0.347222	0.814815		0.496082	0.938426	FALSE	FALSE	1000		bin20	0.482456	0.388889	0.637037	0.555556	0.909091	0.588235	0.45	0.472767	0.407407	0.4	0.549451	0.405797	0.454545
bin21	0.598901	0.399267	0.508658	0.537382	0.573529	0.498148	0.531339	0.358333	0.51627	0.406151	0.46345	0.565278	0.488889	0.472222	0.393762	0.482513	0.588235	0.534343	0.333333	0.578358	0.462963	0.544892	0.416728	0.315789	0.402977	0.717262	0.355556	0.826389		0.49539	0.586057	FALSE	FALSE	1050		bin21	0.529605	0.439815	0.583878	0.543474	0.843434	0.62605	0.487524	0.44281	0.386878	0.448148	0.592186	0.333333	0.451178
bin22	0.680556	0.434002	0.5	0.52381	0.420343	0.536319	0.561404	0.24359	0.445094	0.397233	0.405147	0.585859	0.496032	0.48	0.394444	0.413508	0.592593	0.507246	0.346612	0.542105	0.468376	0.537776	0.446168	0.301136	0.342172	0.660684	0.322478	0.811869		0.478448	0.529222	FALSE	FALSE	1100		bin22	0.5	0.437418	0.568627	0.509804	0.861067	0.646104	0.448148	0.453159	0.421296	0.461538	0.518519	0.277778	0.418519
bin23	0.642857	0.380952	0.545455	0.52381	0.294118	0.4	0.578947	0.291667	0.409091	0.391304	0.423684	0.607843	0.458333	0.48	0.383333	0.491228	0.588235	0.5	0.27451	0.565217	0.5	0.481481	0.414863	0.315789	0.275362	0.6875	0.416667	0.737473		0.466419	0.956975	FALSE	FALSE	1150		bin23	0.5	0.55787	0.61423	0.444444	0.869565	0.607843	0.45	0.428922	0.388889	0.5	0.619048	0.304348	0.424242
bin24	0.546032	0.393651	0.530303	0.52381	0.294118	0.4	0.578947	0.3125	0.409091	0.391304	0.407018	0.647059	0.4375	0.493333	0.3	0.508772	0.529412	0.5	0.235294	0.565217	0.52729	0.438596	0.434783	0.280702	0.217391	0.625	0.458333	0.685185		0.452523	0.752312	FALSE	FALSE	1200		bin24	0.540476	0.555556	0.585965	0.454191	0.869565	0.588235	0.45	0.411765	0.5	0.5	0.595238	0.324111	0.411616
bin25	0.571429	0.4	0.462963	0.492063	0.294118	0.507895	0.578947	0.3125	0.409091	0.391304	0.393651	0.647059	0.466667	0.52	0.3	0.561404	0.529412	0.5	0.196078	0.565217	0.555556	0.421053	0.391304	0.268031	0.246377	0.666667	0.458333	0.555556		0.452238	0.839364	FALSE	FALSE	1250		bin25	0.52381	0.577342	0.54386	0.508772	0.869565	0.611111	0.45	0.396514	0.518519	0.5	0.541667	0.347826	0.466667
bin26	0.525641	0.4	0.433333	0.396825	0.294118	0.578947	0.578947	0.3625	0.439394	0.333333	0.396825	0.627451	0.488889	0.533889	0.266667	0.578947	0.529412	0.486111	0.176471	0.565217	0.571429	0.421053	0.376812	0.298246	0.26087	0.6875	0.458333	0.588235		0.451978	0.767725	FALSE	FALSE	1300		bin26	0.507937	0.555556	0.465789	0.385965	0.826087	0.592593	0.45	0.388889	0.462963	0.5	0.5	0.347826	0.5
bin27	0.5	0.409524	0.212121	0.396825	0.254902	0.666667	0.631579	0.4	0.363636	0.15942	0.359307	0.54902	0.47619	0.56	0.133333	0.526316	0.529412	0.416667	0.235294	0.514493	0.555556	0.473684	0.333333	0.175439	0.26087	0.625	0.458333	0.529412		0.418083	0.9492	FALSE	FALSE	1350		bin27	0.539683	0.577342	0.433333	0.421053	0.70224	0.481481	0.4	0.396514	0.407407	0.395833	0.5	0.333333	0.466667
bin28	0.274725	0.46176	0.0909091	0.365079	0.235294	0.621053	0.631579	0.428571	0.257576	0.130435	0.415584	0.54902	0.364469	0.626667	0.0333333	0.526316	0.45098	0.416667	0.294118	0.5	0.466667	0.596491	0.376812	0.0701754	0.272727	0.333333	0.5	0.740741		0.393967	0.902948	FALSE	FALSE	1400		bin28	0.595238	0.5	0.382869	0.333333	0.57971	0.462963	0.35	0.428922	0.388889	0.375	0.411765	0.42029	0.4
bin29	0.404762	0.439394	0	0.380952	0.286765	0.6	0.631579	0.43956	0.227273	0.130435	0.47619	0.490196	0.399267	0.68	0	0.403509	0.470588	0.402778	0.254902	0.469697	0.438596	0.654971	0.405797	0.0526316	0.318841	0.0625	0.56	0.754386		0.386985	0.873937	FALSE	FALSE	1450		bin29	0.650794	0.519608	0.388235	0.421053	0.376812	0.5	0.366667	0.416667	0.37037	0.375	0.431373	0.391304	0.4
bin30	0.410256	0.393939	0.111111	0.444444	0.375	0.6	0.631579	0.538462	0.227273	0.173913	0.492063	0.490196	0.452381	0.653333	0	0.350877	0.490196	0.361111	0.313725	0.469697	0.444444	0.722222	0.454545	0.0526316	0.42029	0.0416667	0.56	0.684211		0.405699	0.40687	FALSE	FALSE	1500		bin30	0.52381	0.54902	0.391667	0.508772	0.333333	0.481481	0.316667	0.355556	0.388889	0.395833	0.411765	0.405797	0.4
bin31	0.424908	0.409091	0.272727	0.555556	0.395833	0.6	0.750487	0.705128	0.23088	0.393939	0.461039	0.607843	0.428571	0.666667	0.0666667	0.368421	0.647059	0.402778	0.352941	0.454545	0.47271	0.722222	0.522398	0.105263	0.492754	0	0.52	0.684211		0.454094	0.0350203	TURE	FALSE	1550		bin31	0.545455	0.541667	0.347619	0.596491	0.26087	0.444444	0.3	0.334325	0.388889	0.458333	0.439951	0.550725	0.4
bin32	0.533333	0.651515	0.712121	0.52381	0.4	0.666667	0.833333	0.787879	0.269841	0.727273	0.447368	0.686275	0.52381	0.72	0.266667	0.368421	0.645833	0.486111	0.381127	0.536232	0.491228	0.722222	0.597497	0.157895	0.608696	0	0.52	0.62963		0.531957	0.000284795	TURE	TURE	1600		bin32	0.536232	0.520833	0.344444	0.631579	0.205916	0.444444	0.2	0.4	0.444444	0.4375	0.333333	0.478261	0.4
bin33	0.628571	0.712121	0.765152	0.571429	0.555556	0.741228	0.888889	0.939394	0.387302	0.80303	0.596032	0.588235	0.615385	0.733333	0.466667	0.298246	0.625	0.472222	0.511111	0.681159	0.462963	0.666667	0.594203	0.277778	0.646904	0.0625	0.52	0.703704		0.589814	0.00016391	TURE	TURE	1650		bin33	0.476912	0.45098	0.410053	0.624756	0.290476	0.444444	0.133333	0.555556	0.5	0.520833	0.375	0.492754	0.615152
bin34	0.538462	0.666667	0.85463	0.587302	0.688889	0.789474	0.981481	0.909091	0.45	0.861472	0.629365	0.588235	0.589744	0.733333	0.683333	0.403509	0.669872	0.458333	0.690476	0.594203	0.490196	0.666667	0.661331	0.388889	0.651515	0.1875	0.602778	0.666667		0.63155	0.00010596	TURE	TURE	1700		bin34	0.466667	0.352941	0.31746	0.594444	0.27381	0.431373	0.105263	0.55873	0.62963	0.604167	0.395833	0.624242	0.545455
bin35	0.487179	0.606061	0.958333	0.580952	0.733333	0.894737	0.941176	0.818182	0.6	0.857143	0.698413	0.54902	0.679487	0.733333	0.75	0.578947	0.711538	0.555556	0.690476	0.521739	0.488889	0.614379	0.637719	0.62963	0.645238	0.333333	0.540556	0.69213		0.661696	1.09909e-05	TURE	TURE	1750		bin35	0.359722	0.339869	0.466667	0.511111	0.212963	0.481618	0.0916179	0.501587	0.592593	0.652778	0.468056	0.6	0.633333
bin36	0.583333	0.621212	0.958333	0.603704	0.790476	0.842105	0.823529	0.718182	0.720635	0.857143	0.666667	0.509804	0.777778	0.733333	0.866667	0.660819	0.818182	0.583333	0.738095	0.507246	0.533333	0.588235	0.689474	0.851852	0.583333	0.645833	0.426667	0.708333		0.69313	2.90579e-06	TURE	TURE	1800		bin36	0.257143	0.333333	0.5	0.472222	0.206972	0.565278	0.12963	0.422024	0.518519	0.644444	0.488889	0.633333	0.57037
bin37	0.552189	0.555556	1	0.641612	0.78022	0.789474	0.79902	0.709091	0.800144	0.894737	0.637719	0.529412	0.886364	0.68	0.9	0.648148	0.933333	0.567778	0.785714	0.545455	0.547619	0.529412	0.655263	0.925926	0.514957	0.833333	0.423889	0.608333		0.702668	1.05972e-05	TURE	TURE	1850		bin37	0.166667	0.38848	0.666667	0.282828	0.275191	0.422222	0.264706	0.413919	0.574074	0.555556	0.608333	0.585965	0.666667
bin38	0.615741	0.52381	0.888889	0.7875	0.794872	0.660819	0.75	0.645455	0.777778	0.859649	0.595861	0.509804	0.848485	0.733333	0.915789	0.648148	0.883333	0.573333	0.78022	0.5	0.5	0.509804	0.624756	0.944444	0.714646	0.9375	0.48	0.555556		0.698554	1.73816e-05	TURE	TURE	1900		bin38	0.15873	0.5	0.777778	0.281818	0.326389	0.425	0.354167	0.400932	0.555556	0.555556	0.666667	0.561404	0.666667
bin39	0.603175	0.460317	1	0.73254	0.83683	0.574074	0.72619	0.751852	0.761905	0.824561	0.588235	0.5	0.734848	0.778092	0.982456	0.722222	0.869048	0.625	0.846154	0.469697	0.542929	0.45098	0.571078	0.944444	0.68254	0.979167	0.506667	0.544444		0.700337	1.28641e-05	TURE	TURE	1950		bin39	0.136905	0.488889	1	0.299074	0.380952	0.458333	0.375	0.423077	0.555556	0.577778	0.666667	0.438596	0.634921
bin40	0.566667	0.39961	1	0.57037	0.895623	0.526316	0.656566	0.768519	0.753968	0.736842	0.588235	0.522222	0.612121	0.73913	1	0.722222	0.833333	0.486111	0.846154	0.507937	0.577778	0.459559	0.579657	0.938725	0.566667	1	0.513333	0.403846		0.670411	0.000129914	TURE	TURE	2000		bin40	0.257143	0.357143	1	0.458333	0.502331	0.5	0.350427	0.324176	0.480392	0.5	0.604762	0.5	0.616667
bin41	0.5	0.39311	1	0.47619	0.962963	0.490253	0.6	0.761905	0.75	0.697168	0.54902	0.476068	0.555556	0.731225	1	0.740741	0.833333	0.47619	0.846154	0.571429	0.555556	0.416667	0.622222	0.9375	0.5	1	0.5	0.371212		0.654088	0.000403328	TURE	TURE	2050		bin41	0.166667	0.357143	1	0.466667	0.575758	0.520833	0.222934	0.333333	0.456944	0.5	0.512821	0.537037	0.5
bin42	0.166667	0.546032	1	0.533333	1	0.406863	0.652778	0.857143	0.779825	0.607843	0.541667	0.512821	0.458333	0.727273	1	0.8125	1	0.526316	0.846154	0.612698	0.5	0.509804	0.70641	0.933135	0.5	1	0.485507	0.363636		0.663812	0.000705993	TURE	TURE	2100		bin42	0.5	0.357143	1	0.377778	0.777778	0.605128	0.12037	0.417508	0.533333	0.538462	0.435897	0.576253	0.388889
bin43	0	0.586081	1	0.466667	1	0.3125	0.753968	0.744444	0.789084	0.54902	0.606914	0.623932	0.416667	0.671429	1	0.770833	NaN	0.592593	0.837607	0.633333	0.444444	0.529412	0.816239	0.880952	0.555556	1	0.530334	0.537037		0.653668	0.0052321	TURE	FALSE	2150		bin43	0.611111	0.267399	NaN	0.3	0.838095	0.583333	0.169841	0.481481	0.5	0.446581	0.388889	0.520915	0.5
bin44	NaN	0.573232	1	0.4	1	0.3125	0.766667	0.722222	0.777778	0.588235	0.595442	0.684343	0.365079	0.637719	1	0.6875	NaN	0.648148	0.818182	0.712281	0.411111	0.5	0.837607	0.832556	0	0.871795	0.619048	0.685185		0.65564	6.08667e-05	TURE	TURE	2200		bin44	0.555556	0.215812	NaN	0.333333	0.222222	0.583333	0	0.588889	0.512821	0.333333	0.322222	0.52381	0
bin45	NaN	0.678788	0.833333	0.25	1	0.291667	0.666667	1	0.703704	0.606443	0.622222	0.636364	0.377778	0.617934	1	0.711111	NaN	0.648557	0.812121	0.740741	0.533333	0.520833	0.760943	0.709091	0	0.802253	0.6	0.72619		0.64808	4.49609e-05	TURE	TURE	2250		bin45	0.5	0.237374	NaN	0.333333	0	0.655983	0	0.75	0.358974	0.218182	0.259259	0.571429	0
bin46	NaN	0.7	1	0.0833333	0	0.286691	0.888889	0.888889	0.614379	0.547619	0.768519	0.533333	0.333333	0.648148	1	0.795238	NaN	0.604167	0.896296	0.814815	0.666667	0.608333	0.75	0.775926	NaN	0.636364	0.6	0.809524		0.650019	0.00109477	TURE	FALSE	2300		bin46	NaN	0.42963	NaN	0.5	0	0.74359	0	0.666667	0.250916	0.151515	0.0740741	0.623932	NaN
bin47	NaN	0.777778	NaN	0	NaN	0.288462	1	1	0.60049	0.462963	0.703704	0.4	0.666667	0.685185	0.909091	0.761905	NaN	0.511111	1	0.78268	0.75	0.6	0.75	0.75	NaN	0.656566	0.592982	1		0.680417	0.000865275	TURE	TURE	2350		bin47	NaN	0.481481	NaN	0.5	0	0.586081	0	0.416667	0.285714	0.181818	0	0.575758	NaN
bin48	NaN	0.75	NaN	0	NaN	0.307692	1	1	0.616667	0.457672	0.72619	0.333333	0.666667	0.745098	0.90303	0.75	NaN	0.444444	1	0.729167	0.722222	0.582906	0.738095	0.644444	NaN	0.654762	0.578947	1		0.667449	0.000239972	TURE	TURE	2400		bin48	NaN	0.355556	NaN	0.166667	0	0.666667	0	0.25	0.316239	0.16431	0	0.57037	NaN
bin49	NaN	0.666667	NaN	0	NaN	0.315657	1	1	0.65873	0.365079	0.714286	0.333333	1	0.743791	0.863492	0.722222	NaN	0.39899	0.747354	0.672222	0.666667	0.615385	0.811111	0.8	NaN	0.67619	0.578947	1		0.667397	7.601e-05	TURE	TURE	2450		bin49	NaN	0.3	NaN	0	0	0.676768	0	0.25	0.441919	0.148148	0.0952381	0.421296	NaN
bin50	NaN	0.785714	NaN	0.666667	NaN	0.353535	1	0.888889	0.641636	0.333333	0.857143	0.233333	1	0.73895	0.833333	0.694444	NaN	0.436364	0.714286	0.580952	1	0.571429	0.8	0.8	NaN	0.916667	0.631579	1		0.716446	1.21281e-05	TURE	TURE	2500		bin50	NaN	0.527778	NaN	0	0	0.481481	0	0.305556	0.454545	0.111111	0.188889	0.410714	NaN
AVE																																				AVE
[truncated: 16 more columns]

## Sheet: FOOD_Deadline
DL																																								DL
CUED	S1	S2	S3	S5	S6	S7	S8	S9	S11	S12	S13	S14	S15	S16	S17	S18	S20	S22	S23	S24	S25	S26	S27	S30	S31	S32	S33	S34	S35	S37	S38	S39		AVE	T-test		bonferroni	time (ms)		UNCUED	S1	S2	S3	S5	S6	S7	S8	S9	S11
																																					p<0.05/50
bin1	0.520661	0.322444	0.639215	0.469136	0.464	0.659498	0.527363	0.472492	0.413181	0.497024	0.504132	0.454502	0.457261	0.509091	0.445402	0.495413	0.482895	0.621978	0.506061	0.436166	0.396172	0.480371	0.526338	0.612536	0.490741	0.54321	0.476419	0.575221	0.445428	0.511905	0.61132	0.539589		0.503349	0.373986	FALSE	FALSE	50		bin1	0.457227	0.562638	0.45095	0.530769	0.466284	0.426304	0.527667	0.534043	0.532975
bin2	0.520661	0.319249	0.624994	0.447531	0.430473	0.641577	0.544776	0.475728	0.404832	0.510511	0.509688	0.441176	0.479365	0.50303	0.448276	0.518519	0.437868	0.624	0.509091	0.455357	0.420173	0.488095	0.513072	0.621083	0.492355	0.535168	0.492188	0.557522	0.463127	0.541667	0.603333	0.527608		0.50319	0.412428	FALSE	FALSE	100		bin2	0.454277	0.554826	0.443526	0.538462	0.450292	0.424036	0.521036	0.553885	0.551181
bin3	0.517906	0.309859	0.607345	0.469136	0.419785	0.616487	0.531328	0.466019	0.422932	0.483483	0.498623	0.447712	0.465409	0.5	0.447293	0.54321	0.42635	0.634667	0.506061	0.440476	0.414953	0.529762	0.5	0.62069	0.49697	0.501472	0.480315	0.577381	0.454277	0.553571	0.639534	0.537037		0.501876	0.351754	FALSE	FALSE	150		bin3	0.46131	0.551849	0.440771	0.551282	0.447084	0.430839	0.453074	0.560606	0.545932
bin4	0.517906	0.320566	0.609692	0.484568	0.434667	0.605735	0.531328	0.478964	0.419902	0.482062	0.497268	0.432343	0.462264	0.50303	0.438746	0.551796	0.449444	0.639054	0.5	0.426043	0.425392	0.550595	0.4967	0.613174	0.504644	0.492298	0.481771	0.589286	0.460177	0.547887	0.653061	0.530694		0.504096	0.400132	FALSE	FALSE	200		bin4	0.446429	0.537631	0.415978	0.54359	0.486777	0.451247	0.449838	0.558081	0.545273
bin5	0.556474	0.362089	0.612536	0.506173	0.472	0.612903	0.528672	0.511327	0.547619	0.522523	0.520661	0.42	0.462203	0.521212	0.519607	0.641646	0.554335	0.733281	0.501529	0.640148	0.546641	0.633929	0.504886	0.609687	0.489183	0.519878	0.520977	0.607143	0.462942	0.537538	0.663265	0.552469		0.543609	0.634678	FALSE	FALSE	250		bin5	0.470238	0.565789	0.432507	0.584615	0.529524	0.47619	0.469256	0.558081	0.634409
bin6	0.607009	0.590476	0.655271	0.601246	0.592	0.673835	0.577114	0.517799	0.696762	0.725118	0.68306	0.423333	0.496914	0.545455	0.606322	0.840497	0.762594	0.789754	0.512177	0.770407	0.653263	0.821429	0.547596	0.646724	0.509118	0.587156	0.666667	0.672619	0.553571	0.540541	0.726276	0.590141		0.630695	0.514382	FALSE	FALSE	300		bin6	0.547461	0.714128	0.446281	0.651399	0.654745	0.621315	0.530744	0.558081	0.723577
bin7	0.729508	0.781891	0.65812	0.736702	0.680217	0.756272	0.666667	0.514563	0.725332	0.902207	0.778192	0.40266	0.601746	0.575758	0.828598	0.910546	0.879724	0.792	0.545455	0.846411	0.793939	0.934524	0.592772	0.703704	0.608025	0.590214	0.84375	0.779762	0.657738	0.552553	0.783137	0.676012		0.713397	0.223889	FALSE	FALSE	350		bin7	0.698088	0.850456	0.448201	0.804071	0.744217	0.704532	0.585761	0.55303	0.745257
bin8	0.77073	0.832469	0.663818	0.858025	0.728495	0.793502	0.733831	0.511327	0.755228	0.940476	0.870523	0.396667	0.701587	0.60303	0.930003	0.950444	0.943007	0.784	0.56839	0.873795	0.889237	0.964286	0.612574	0.700855	0.668649	0.623853	0.902887	0.877976	0.66369	0.546547	0.884354	0.80818		0.761014	0.400805	FALSE	FALSE	400		bin8	0.788101	0.925725	0.463653	0.928753	0.79941	0.72664	0.673139	0.545455	0.752055
bin9	0.780224	0.895709	0.673306	0.907407	0.759345	0.827785	0.783058	0.524272	0.775472	0.972721	0.906336	0.403333	0.761006	0.618182	0.940171	0.966276	0.943925	0.787634	0.5866	0.877741	0.914373	0.979167	0.624183	0.706553	0.697248	0.64526	0.924479	0.958333	0.678571	0.55365	0.904328	0.858491		0.785473	0.286001	FALSE	FALSE	450		bin9	0.812056	0.939119	0.456534	0.951399	0.807313	0.751811	0.779935	0.54798	0.758743
bin10	0.791063	0.886792	0.630243	0.912926	0.759084	0.806932	0.770615	0.534082	0.742148	0.980981	0.916827	0.439707	0.812098	0.590325	0.931037	0.958654	0.945238	0.724881	0.594488	0.852499	0.909192	0.978688	0.604054	0.669097	0.690955	0.676533	0.881944	0.993525	0.673085	0.556452	0.886395	0.869509		0.780314	0.459374	FALSE	FALSE	500		bin10	0.812852	0.936984	0.435714	0.949749	0.801291	0.780298	0.774779	0.557823	0.732631
bin11	0.799375	0.846569	0.641887	0.923675	0.768239	0.824938	0.798243	0.567896	0.754257	0.963919	0.91234	0.422057	0.819758	0.593834	0.947771	0.958618	0.922222	0.745616	0.620557	0.845718	0.906238	0.982072	0.650533	0.699971	0.715765	0.637483	0.754818	1	0.687983	0.527761	0.880103	0.899962		0.781881	0.249784	FALSE	FALSE	550		bin11	0.829831	0.935503	0.416256	0.934711	0.838418	0.763861	0.781906	0.546084	0.759657
bin12	0.77562	0.785388	0.605056	0.929012	0.773603	0.792115	0.803483	0.569579	0.709091	0.86083	0.900826	0.426667	0.838095	0.597598	0.885051	0.930409	0.89256	0.682796	0.627273	0.811555	0.831468	0.963964	0.615123	0.689266	0.703364	0.657492	0.617188	1	0.669643	0.525526	0.848563	0.918739		0.757404	0.34378	FALSE	FALSE	600		bin12	0.809524	0.873539	0.40163	0.882404	0.830357	0.721088	0.786408	0.546366	0.734417
bin13	0.733894	0.720003	0.584241	0.867284	0.752688	0.752688	0.798507	0.566343	0.655407	0.810683	0.900826	0.426667	0.820246	0.576577	0.873285	0.903904	0.86859	0.608624	0.584848	0.769198	0.767007	0.939224	0.607843	0.665653	0.678899	0.666667	0.559896	0.994048	0.642857	0.522523	0.795699	0.90281		0.728676	0.602229	FALSE	FALSE	650		bin13	0.796386	0.8008	0.397222	0.829517	0.85119	0.648526	0.779935	0.530303	0.701053
bin14	0.706998	0.662037	0.568428	0.802469	0.733871	0.706093	0.78607	0.553398	0.650487	0.781711	0.889807	0.446667	0.800623	0.561916	0.849848	0.858859	0.867946	0.568	0.566667	0.691131	0.702092	0.908257	0.564356	0.65812	0.688073	0.651376	0.520833	0.97619	0.643688	0.522523	0.782963	0.887844		0.704979	0.508185	FALSE	FALSE	700		bin14	0.8	0.753736	0.402815	0.788256	0.848214	0.571429	0.744337	0.51386	0.665829
bin15	0.661017	0.62963	0.568944	0.756173	0.720771	0.641577	0.768657	0.543689	0.633333	0.752976	0.873278	0.49505	0.811321	0.548485	0.852262	0.840841	0.854417	0.562667	0.548763	0.694823	0.662383	0.846082	0.565359	0.651577	0.681957	0.64526	0.507812	0.94616	0.630952	0.537538	0.767826	0.858619		0.689381	0.371176	FALSE	FALSE	750		bin15	0.785531	0.724359	0.399991	0.771179	0.85119	0.492063	0.695793	0.503759	0.643032
bin16	0.581921	0.587963	0.56285	0.602285	0.692275	0.523297	0.738806	0.533981	0.552962	0.701335	0.814208	0.528053	0.778423	0.521212	0.807962	0.74682	0.793651	0.512	0.512121	0.619584	0.582045	0.640793	0.53268	0.628857	0.629969	0.611621	0.493438	0.6997	0.571429	0.497024	0.64007	0.721357		0.623772	0.488904	FALSE	FALSE	800		bin16	0.657658	0.587607	0.401749	0.666667	0.838749	0.380952	0.676375	0.488722	0.597299
bin17	0.490196	0.451095	0.546252	0.459877	0.604172	0.455197	0.69403	0.530744	0.468468	0.604949	0.740437	0.51634	0.725697	0.487879	0.72229	0.65864	0.712845	0.469204	0.493939	0.407972	0.529771	0.54038	0.529412	0.606838	0.510732	0.559633	0.480417	0.525526	0.467262	0.488095	0.599345	0.544739		0.550699	0.558607	FALSE	FALSE	850		bin17	0.502894	0.483843	0.4006	0.590241	0.765766	0.335601	0.640777	0.486216	0.47541
bin18	0.430159	0.375902	0.541145	0.416667	0.509333	0.413667	0.656716	0.527508	0.448758	0.524188	0.612022	0.513072	0.638365	0.466667	0.610547	0.625334	0.711538	0.426215	0.492383	0.368324	0.496855	0.470238	0.519608	0.621083	0.461059	0.510703	0.473958	0.444444	0.421829	0.517857	0.562724	0.451713		0.508143	0.417701	FALSE	FALSE	900		bin18	0.414679	0.374097	0.383009	0.548956	0.705706	0.304554	0.621359	0.481203	0.410943
bin19	0.411314	0.274189	0.546784	0.385802	0.476085	0.429517	0.634328	0.514563	0.439394	0.486486	0.530055	0.503399	0.537217	0.439394	0.510455	0.575348	0.685897	0.403226	0.47256	0.34026	0.476603	0.446429	0.509804	0.626781	0.376947	0.495413	0.455729	0.417417	0.415929	0.547619	0.532146	0.423676		0.478774	0.51566	FALSE	FALSE	950		bin19	0.398714	0.328231	0.411262	0.557565	0.61638	0.297506	0.605178	0.446115	0.373594
bin20	0.377143	0.258527	0.544975	0.35111	0.446083	0.452961	0.609923	0.503333	0.420124	0.445531	0.509574	0.489932	0.45411	0.439001	0.46428	0.57635	0.636576	0.408176	0.465866	0.306023	0.458308	0.414237	0.506602	0.632179	0.339683	0.5	0.430086	0.398678	0.394674	0.563974	0.496296	0.394579		0.459028	0.558641	FALSE	FALSE	1000		bin20	0.345992	0.306325	0.400494	0.536142	0.597306	0.305488	0.584822	0.412054	0.348953
bin21	0.385614	0.233165	0.529316	0.336109	0.403275	0.42733	0.608099	0.46778	0.441394	0.450528	0.499674	0.473699	0.468714	0.434173	0.4489	0.595077	0.542506	0.422538	0.480226	0.307289	0.4586	0.412266	0.499533	0.640963	0.332666	0.52333	0.408674	0.381527	0.407415	0.55085	0.511062	0.401973		0.452633	0.407943	FALSE	FALSE	1050		bin21	0.344807	0.270412	0.395707	0.512473	0.578303	0.287131	0.551126	0.41134	0.355185
bin22	0.379802	0.222792	0.529215	0.32716	0.400683	0.435595	0.588964	0.483819	0.411342	0.435819	0.466843	0.442568	0.487361	0.434211	0.463636	0.572739	0.511387	0.396878	0.493884	0.300553	0.440172	0.377327	0.511586	0.643678	0.321159	0.510645	0.417753	0.383279	0.422499	0.543781	0.52887	0.378873		0.445777	0.343536	FALSE	FALSE	1100		bin22	0.338392	0.259383	0.391036	0.497515	0.5821	0.303543	0.540677	0.377611	0.311976
bin23	0.388889	0.217593	0.540533	0.311728	0.391534	0.448029	0.59204	0.462783	0.410714	0.45015	0.449036	0.45098	0.473226	0.451515	0.44884	0.558559	0.48751	0.368	0.506088	0.345029	0.444444	0.377976	0.509804	0.646552	0.310737	0.507645	0.398438	0.386905	0.418879	0.529762	0.536471	0.37963		0.443751	0.333575	FALSE	FALSE	1150		bin23	0.345566	0.273098	0.386555	0.496183	0.590497	0.318832	0.546926	0.385965	0.301587
bin24	0.383333	0.231481	0.549858	0.320988	0.394108	0.45321	0.589552	0.456311	0.407738	0.43452	0.418274	0.428105	0.475164	0.448485	0.448993	0.534535	0.475048	0.357333	0.478537	0.373596	0.453453	0.366071	0.506568	0.652299	0.274691	0.504587	0.39165	0.369048	0.430678	0.532738	0.511111	0.364198		0.438008	0.478772	FALSE	FALSE	1200		bin24	0.353862	0.285056	0.403955	0.503817	0.595238	0.322741	0.559871	0.388471	0.283069
bin25	0.414325	0.226852	0.568573	0.311728	0.368968	0.491039	0.587065	0.459547	0.377976	0.433628	0.429752	0.48366	0.475019	0.457849	0.445424	0.501502	0.451713	0.365333	0.468085	0.406433	0.471471	0.33631	0.50495	0.643678	0.234568	0.510703	0.377953	0.380952	0.424779	0.52381	0.496457	0.370717		0.437526	0.239104	FALSE	FALSE	1250		bin25	0.348624	0.292701	0.403955	0.506361	0.556843	0.309772	0.546926	0.398496	0.261905
bin26	0.490358	0.237154	0.558091	0.29321	0.360215	0.53405	0.597015	0.459547	0.278208	0.401786	0.432846	0.693716	0.427195	0.397543	0.416437	0.403496	0.433426	0.306667	0.442091	0.434301	0.439394	0.25	0.529412	0.636114	0.24159	0.495413	0.249344	0.318452	0.40413	0.479167	0.371494	0.368467		0.418135	0.104985	FALSE	FALSE	1300		bin26	0.345566	0.280942	0.404137	0.46056	0.573574	0.267123	0.533981	0.39599	0.204825
bin27	0.524885	0.259624	0.539548	0.280864	0.376344	0.608072	0.594527	0.453074	0.294985	0.358442	0.453552	0.913762	0.311728	0.38651	0.402879	0.375354	0.393601	0.309333	0.377336	0.433826	0.428321	0.161599	0.565359	0.617816	0.35474	0.443425	0.193241	0.149158	0.415929	0.46131	0.263151	0.380236		0.408829	0.034447	TRUE	FALSE	1350		bin27	0.340423	0.213706	0.358221	0.348601	0.614892	0.20592	0.491909	0.345865	0.208995
bin28	0.536111	0.314286	0.5	0.277778	0.408602	0.69824	0.58209	0.454566	0.415929	0.339339	0.472678	0.938982	0.242975	0.367601	0.416892	0.377726	0.383146	0.333333	0.357798	0.429886	0.461059	0.15015	0.564884	0.622514	0.452599	0.412844	0.21639	0.116769	0.424779	0.485119	0.275494	0.441599		0.421005	0.00526636	TRUE	FALSE	1400		bin28	0.367513	0.150875	0.274784	0.267176	0.607228	0.158621	0.491909	0.327422	0.333333
bin29	0.531818	0.345875	0.507123	0.299383	0.475806	0.739927	0.567164	0.500097	0.64881	0.370543	0.486339	0.938776	0.25936	0.439252	0.44101	0.395639	0.40005	0.429333	0.350598	0.447093	0.46729	0.192192	0.556634	0.607551	0.566202	0.409786	0.257218	0.122372	0.463127	0.520833	0.363296	0.467259		0.455242	0.000446362	TRUE	TURE	1450		bin29	0.424266	0.137212	0.228149	0.199452	0.551338	0.13547	0.452757	0.322255	0.567158
bin30	0.516529	0.392409	0.537063	0.314815	0.585462	0.786626	0.522388	0.550136	0.735119	0.441141	0.54146	0.952241	0.267401	0.558844	0.447964	0.479335	0.465347	0.573333	0.360606	0.558207	0.475477	0.329517	0.588997	0.598225	0.644113	0.406728	0.338583	0.135135	0.474662	0.5625	0.453184	0.569006		0.50508	1.10042e-05	TRUE	TURE	1500		bin30	0.554258	0.116993	0.175118	0.158974	0.52924	0.134855	0.40451	0.330749	0.677165
bin31	0.480321	0.492754	0.636454	0.438041	0.662243	0.850738	0.458796	0.578477	0.782738	0.531886	0.611884	0.965704	0.387024	0.655312	0.522989	0.567999	0.539804	0.672043	0.445232	0.681178	0.546956	0.516905	0.595469	0.628874	0.73282	0.498471	0.493438	0.216216	0.530167	0.633929	0.57197	0.623853		0.579709	2.4057e-07	TRUE	TURE	1550		bin31	0.579439	0.151934	0.176414	0.190698	0.492599	0.181419	0.418148	0.34323	0.711286
bin32	0.455566	0.60026	0.71081	0.583028	0.638002	0.90269	0.427498	0.576409	0.782738	0.675926	0.633602	0.978647	0.592233	0.724771	0.643359	0.685872	0.642256	0.734494	0.547401	0.681944	0.645492	0.709105	0.569579	0.659519	0.776936	0.568807	0.674541	0.447447	0.630631	0.723214	0.694836	0.698437		0.656752	4.0733e-09	TRUE	TURE	1600		bin32	0.563863	0.235062	0.149046	0.257812	0.41184	0.229999	0.491514	0.332195	0.685039
bin33	0.462644	0.610193	0.726164	0.710318	0.611682	0.848827	0.480491	0.588268	0.78802	0.728237	0.64041	0.98534	0.76	0.746192	0.678415	0.741485	0.735553	0.795844	0.590214	0.681015	0.690377	0.795145	0.540707	0.688292	0.749884	0.642202	0.810525	0.627628	0.70303	0.761905	0.740421	0.682652		0.69819	2.3201e-10	TRUE	TURE	1650		bin33	0.564245	0.318856	0.189876	0.341719	0.375375	0.281796	0.477215	0.317501	0.614173
bin34	0.461538	0.614245	0.724457	0.753618	0.60769	0.79201	0.487555	0.576641	0.77269	0.718926	0.661198	0.987539	0.818237	0.804746	0.684386	0.802474	0.782928	0.82529	0.611621	0.661167	0.712069	0.849354	0.571895	0.659509	0.799871	0.672783	0.845297	0.714715	0.62794	0.77381	0.753788	0.67454		0.712641	4.38583e-10	TRUE	TURE	1700		bin34	0.559748	0.46727	0.236206	0.443022	0.390249	0.320723	0.470202	0.318456	0.452962
bin35	0.483982	0.637894	0.78741	0.76577	0.62283	0.709934	0.500287	0.541928	0.752967	0.741716	0.670139	0.985229	0.791622	0.760046	0.710498	0.91754	0.781084	0.808043	0.650329	0.655661	0.689263	0.880952	0.613474	0.635693	0.761928	0.64526	0.849869	0.782528	0.568784	0.77947	0.765804	0.621587		0.714673	3.7015e-09	TRUE	TURE	1750		bin35	0.573679	0.560704	0.26264	0.503735	0.381589	0.384022	0.458184	0.324134	0.356413
bin36	0.520468	0.754441	0.83153	0.790535	0.644055	0.695691	0.552885	0.52608	0.728458	0.718481	0.643323	0.980694	0.802273	0.70528	0.686246	0.941411	0.775302	0.792208	0.673016	0.665181	0.660104	0.880138	0.638665	0.637611	0.719133	0.636935	0.831304	0.838921	0.514789	0.798709	0.738609	0.595247		0.716179	4.12231e-09	TRUE	TURE	1800		bin36	0.596226	0.613466	0.265781	0.534221	0.329078	0.407392	0.463655	0.282031	0.27347
bin37	0.523944	0.762195	0.825467	0.762424	0.676998	0.662749	0.529336	0.547036	0.665171	0.739813	0.646019	1	0.747782	0.743477	0.706195	0.946975	0.72769	0.766424	0.699321	0.700448	0.62372	0.884308	0.596571	0.564036	0.794296	0.623031	0.867735	0.880734	0.535279	0.778199	0.700996	0.622849		0.714101	3.08918e-09	TRUE	TURE	1850		bin37	0.583717	0.666887	0.290942	0.496124	0.289313	0.386142	0.4588	0.304435	0.193989
bin38	0.543902	0.756911	0.820609	0.718596	0.675281	0.755418	0.51804	0.533611	0.638468	0.783589	0.689792	1	0.758834	0.791544	0.711178	0.938719	0.730741	0.691734	0.747683	0.770129	0.609667	0.853744	0.673559	0.548092	0.710317	0.622955	0.88788	0.907742	0.519575	0.792572	0.69037	0.621597		0.719152	9.95571e-11	TRUE	TURE	1900		bin38	0.483054	0.630084	0.300027	0.410407	0.305786	0.3	0.424298	0.345276	0.133834
bin39	0.603085	0.653502	0.884412	0.726104	0.64902	0.762756	0.531002	0.508339	0.577066	0.7632	0.685674	1	0.721468	0.688633	0.656902	0.898148	0.774411	0.679441	0.77836	0.745614	0.57385	0.832276	0.689004	0.537028	0.866667	0.646139	0.888122	0.934791	0.603715	0.815149	0.697225	0.561972		0.716659	2.05692e-11	TRUE	TURE	1950		bin39	0.455184	0.610714	0.263086	0.322435	0.29246	0.245238	0.418343	0.321254	0.123004
bin40	0.646857	0.558772	0.887942	0.69813	0.604674	0.747354	0.515553	0.514231	0.518792	0.763568	0.698869	1	0.647617	0.610476	0.635402	0.852808	0.751449	0.718882	0.730576	0.693452	0.571406	0.768171	0.671364	0.459938	1	0.643389	0.948134	0.907873	0.662537	0.816026	0.561799	0.538671		0.698272	6.51385e-11	TRUE	TURE	2000		bin40	0.324662	0.61132	0.412217	0.363095	0.309942	0.222222	0.477679	0.284458	0.115825
bin41	0.674677	0.660131	0.875344	0.711485	0.504815	0.672222	0.549882	0.532414	0.649573	0.671827	0.540523	1	0.578659	0.490252	0.663277	0.804543	0.625022	0.766491	0.704545	0.896825	0.604713	0.611111	0.663836	0.419048	NaN	0.678943	0.870806	0.873331	0.659725	0.819228	0.552185	0.526263		0.672635	3.83165e-10	TRUE	TURE	2050		bin41	0.310556	0.593464	0.375992	0.484848	0.283333	0	0.487937	0.275444	0.170709
bin42	0.671442	0.702742	0.873593	0.686325	0.577652	0.638889	0.487565	0.507246	0.69085	0.65662	0.536734	1	0.558886	0.538075	0.658935	0.749346	0.560171	0.568376	0.69954	1	0.575969	0.430037	0.683034	0.270833	NaN	0.71108	0.872507	0.822614	0.654694	0.820225	0.562532	0.57064		0.656037	6.09841e-10	TRUE	TURE	2100		bin42	0.32952	0.44425	0.35711	0.439153	0.228571	0	0.519608	0.304388	0.210781
bin43	0.669251	0.698413	0.938426	0.833333	0.481481	0.666667	0.389731	0.393557	0.519943	0.651562	0.247222	1	0.600779	0.604416	0.597419	0.762821	0.539683	0.642424	0.672712	1	0.578702	0.578704	0.740882	0.642857	NaN	0.748212	0.794444	0.847465	0.704332	0.851732	0.61453	0.563636		0.663721	1.47933e-09	TRUE	TURE	2150		bin43	0.321332	0.578704	0.427706	0.355556	0	0	0.541667	0.323232	0.32672
bin44	0.68941	0.555556	0.847086	0.655556	0.420635	1	0.655245	0.373593	0.452381	0.615686	0	1	0.512056	0.565278	0.50777	0.759091	0.569989	0.709091	0.708864	1	0.577104	0.647619	0.863488	0.666667	NaN	0.780676	0.722222	0.815988	0.607875	0.873677	0.678298	0.565531		0.657949	1.32987e-08	TRUE	TURE	2200		bin44	0.340502	0.461905	0.261905	0	0	NaN	0.527778	0.481481	0.311905
bin45	0.766778	0.5	0.8	0.555556	0.5	1	0.765873	0.369444	0.67619	0.611111	0	NaN	0.523932	0.542735	0.566535	0.833333	0.586053	0.533333	0.659139	1	0.563636	0.644444	0.73545	0.714286	NaN	0.73995	0.666667	0.885947	0.573088	0.904286	0.747937	0.547619		0.650444	7.3478e-10	TRUE	TURE	2250		bin45	0.31243	0.366667	0.444444	0	0	NaN	0.666667	0.365079	0.277778
bin46	0.783333	0.333333	0.962963	1	0.444444	1	0.933333	0.377778	1	0.688095	0.166667	NaN	0.515152	0.688095	0.455011	0.802381	0.686869	0.555556	0.53367	NaN	0.524955	0.333333	0.783333	0.622222	NaN	0.693407	0.166667	0.948246	0.648366	0.937337	0.765455	0.693603		0.656676	1.39232e-08	TRUE	TURE	2300		bin46	0.424501	0.388889	0.388889	0	NaN	NaN	0.718182	0.277778	0
bin47	0.933333	0	0.833333	1	0.5	NaN	1	0.466667	1	0.566667	0.5	NaN	0.55119	0.8	0.322969	0.833333	0.857143	0.333333	0.805556	NaN	0.533333	0	0.722222	0.555556	NaN	0.721537	0	0.929167	0.527778	0.941919	0.869048	0.848677		0.64117	1.67337e-05	TRUE	TURE	2350		bin47	0.585185	0.5	0.333333	NaN	NaN	NaN	0.733333	0.388889	0
bin48	1	0	0.388889	1	0	NaN	1	0.5	NaN	0.833333	0.25	NaN	0.355556	0.916667	0.227273	1	1	0.333333	0.694444	NaN	0.654762	0	0.666667	0.166667	NaN	0.827778	0.333333	0.802381	0.588889	1	0.870796	0.766667		0.599164	0.00334018	TRUE	FALSE	2400		bin48	0.555556	0.5	0	NaN	NaN	NaN	1	0	0
bin49	NaN	0	0.5	1	1	NaN	1	0	NaN	1	NaN	NaN	0.411111	1	0.208333	1	1	1	0.833333	NaN	0.566667	0.333333	1	NaN	NaN	0.771164	1	1	0.555556	1	0.738889	0.638889		0.731553	5.25458e-05	TRUE	TURE	2450		bin49	0	0.166667	NaN	NaN	NaN	NaN	NaN	0	0
bin50	NaN	NaN	0.5	NaN	NaN	NaN	1	0	NaN	NaN	NaN	NaN	0.444444	1	0	1	NaN	NaN	1	NaN	0.666667	1	1	NaN	NaN	0.861111	NaN	1	1	1	0.583333	0.666667		0.748366	0.00379688	TRUE	FALSE	2500		bin50	0	0	NaN	NaN	NaN	NaN	NaN	NaN	NaN
AVE																																								AVE
DL DOT																																								DL DOT
CUED	S1	S2	S3	S5	S6	S7	S8	S9	S11	S12	S13	S14	S15	S16	S17	S18	S20	S22	S23	S24	S25	S26	S27	S30	S31	S32	S33	S34	S35	S37	S38	S39			T-test			time (ms)		UNCUED	S1	S2	S3	S5	S6	S7	S8	S9	S11
bin1	0.508333	0.329365	0.653595	0.461538	0.470588	0.612403	0.456522	0.516129	0.291667	0.516667	0.564815	0.477477	0.571326	0.461538	0.430894	0.619048	0.556503	0.528862	0.5	0.451162	0.326905	0.460784	0.444444	0.619048	0.464646	0.545455	0.434109	0.568627	0.425	0.447368	0.654321	0.576577		0.498304	0.701929	FALSE	FALSE	50		bin1	0.538462	0.591837	0.428571	0.593496	0.5	0.378378	0.505051	0.55102	0.547009
bin2	0.491667	0.333333	0.627451	0.42735	0.45098	0.596899	0.514493	0.483871	0.305691	0.5	0.546296	0.468468	0.602151	0.444444	0.423926	0.619048	0.552083	0.504065	0.539216	0.414414	0.320635	0.470588	0.416667	0.634921	0.454545	0.535354	0.472868	0.558824	0.491667	0.526316	0.679012	0.574074		0.499416	0.799116	FALSE	FALSE	100		bin2	0.521368	0.585034	0.428571	0.536585	0.485507	0.36036	0.484848	0.571429	0.57265
bin3	0.5	0.333333	0.581699	0.410256	0.411765	0.596899	0.555556	0.483871	0.317073	0.475	0.564815	0.504505	0.55914	0.435897	0.420635	0.626984	0.521169	0.512195	0.558824	0.423423	0.336165	0.509804	0.416667	0.634921	0.484848	0.505051	0.460317	0.558824	0.525	0.508772	0.62963	0.555556		0.497456	0.969538	FALSE	FALSE	150		bin3	0.529915	0.55102	0.428571	0.552846	0.442029	0.369369	0.454545	0.571429	0.589744
bin4	0.525	0.349953	0.58549	0.435897	0.431373	0.581395	0.577778	0.483871	0.308943	0.508333	0.583333	0.513514	0.591398	0.444444	0.412698	0.642857	0.526882	0.516463	0.539216	0.414414	0.330725	0.509804	0.416667	0.619048	0.434343	0.484848	0.503876	0.558824	0.5	0.526316	0.580247	0.554555		0.499766	0.7928	FALSE	FALSE	200		bin4	0.487179	0.52381	0.428571	0.560976	0.5	0.396396	0.484848	0.564626	0.608637
bin5	0.575	0.407179	0.58	0.435897	0.431373	0.55814	0.540097	0.483871	0.382114	0.525	0.592593	0.531532	0.634409	0.470085	0.444444	0.674603	0.526882	0.558333	0.519608	0.552124	0.34413	0.588235	0.416667	0.619048	0.454545	0.515152	0.55814	0.558824	0.458333	0.54386	0.580247	0.585586		0.520189	0.927177	FALSE	FALSE	250		bin5	0.495726	0.52381	0.428571	0.585366	0.5	0.441441	0.515152	0.55102	0.657895
bin6	0.569919	0.564103	0.62	0.470085	0.509804	0.565891	0.572464	0.494624	0.487805	0.666667	0.638889	0.513514	0.645161	0.461538	0.47619	0.823074	0.666667	0.581911	0.490196	0.596639	0.445299	0.656863	0.448677	0.611111	0.454545	0.555556	0.682171	0.568627	0.533333	0.526316	0.62963	0.603604		0.56659	0.616499	FALSE	FALSE	300		bin6	0.512821	0.680272	0.404762	0.634146	0.543478	0.486486	0.494949	0.55102	0.657895
bin7	0.642276	0.620133	0.6	0.555556	0.530006	0.635659	0.608696	0.516129	0.528455	0.890385	0.666667	0.44019	0.677419	0.470085	0.620209	0.895083	0.854167	0.585366	0.519608	0.638095	0.591667	0.813725	0.471148	0.642857	0.464646	0.545455	0.829457	0.627451	0.591667	0.570175	0.654321	0.675676		0.624138	0.480351	FALSE	FALSE	350		bin7	0.538462	0.816327	0.37037	0.747967	0.623188	0.522523	0.515152	0.544218	0.675439
bin8	0.691057	0.708949	0.606667	0.752137	0.565657	0.689922	0.688406	0.516129	0.590244	0.931624	0.777778	0.396396	0.7	0.470085	0.814363	0.902439	0.909091	0.560976	0.598039	0.67619	0.750097	0.911765	0.480672	0.642857	0.484848	0.616162	0.873016	0.72549	0.583333	0.552632	0.82716	0.754755		0.679654	0.657337	FALSE	FALSE	400		bin8	0.615385	0.897959	0.373457	0.902439	0.688406	0.594595	0.545455	0.530612	0.684211
bin9	0.699187	0.793103	0.622484	0.846154	0.626263	0.767442	0.746377	0.516129	0.576496	0.948718	0.842593	0.405405	0.817204	0.487179	0.833333	0.926829	0.919192	0.566667	0.656863	0.688624	0.786325	0.970588	0.472222	0.642857	0.484848	0.636364	0.891473	0.892157	0.616667	0.622807	0.851852	0.787037		0.71692	0.485363	FALSE	FALSE	450		bin9	0.649573	0.897959	0.357143	0.908943	0.702899	0.63964	0.767677	0.530612	0.684211
bin10	0.677439	0.786311	0.599348	0.867428	0.637242	0.746124	0.704741	0.53853	0.541054	0.95137	0.863017	0.434178	0.868524	0.478408	0.828307	0.908845	0.929798	0.504605	0.635621	0.660648	0.806628	0.966206	0.48961	0.613146	0.528288	0.727273	0.81685	0.980095	0.602778	0.626743	0.839454	0.815887		0.717953	0.73399	FALSE	FALSE	500		bin10	0.67094	0.887515	0.375188	0.899381	0.712393	0.708373	0.794648	0.523009	0.62115
bin11	0.728509	0.778934	0.59406	0.887152	0.614927	0.754045	0.749953	0.519496	0.521265	0.894048	0.786444	0.39504	0.856324	0.452237	0.832407	0.87031	0.871717	0.475	0.68715	0.590855	0.735204	0.967974	0.50664	0.707868	0.499303	0.665043	0.734904	1	0.578491	0.594861	0.831434	0.800505		0.702566	0.486696	FALSE	FALSE	550		bin11	0.644925	0.880159	0.334325	0.81369	0.75788	0.586232	0.753666	0.513908	0.638393
bin12	0.652846	0.724138	0.578824	0.854701	0.604278	0.728682	0.717391	0.548387	0.5	0.608333	0.722222	0.423423	0.903226	0.470085	0.663957	0.888115	0.756061	0.408333	0.647059	0.55358	0.669312	0.941176	0.462169	0.690476	0.505051	0.717172	0.682171	1	0.583333	0.578947	0.777778	0.861111		0.669448	0.948232	FALSE	FALSE	600		bin12	0.632479	0.77551	0.353616	0.694512	0.742424	0.585586	0.787879	0.55102	0.638889
bin13	0.57265	0.701149	0.562876	0.777778	0.558824	0.651163	0.73913	0.548387	0.438596	0.491667	0.703704	0.459459	0.860215	0.461538	0.65331	0.912698	0.666667	0.371951	0.617647	0.567568	0.638346	0.901961	0.453704	0.663569	0.515152	0.666667	0.643411	1	0.583333	0.561404	0.691358	0.87619		0.641002	0.831703	FALSE	FALSE	650		bin13	0.598291	0.71216	0.358025	0.593496	0.765152	0.54955	0.727273	0.544218	0.625178
bin14	0.582546	0.62069	0.543007	0.675214	0.529412	0.604651	0.753623	0.548387	0.474573	0.416667	0.657407	0.468468	0.822917	0.452991	0.617886	0.904762	0.688172	0.357724	0.607843	0.508772	0.629825	0.862745	0.416667	0.634146	0.525253	0.666667	0.581395	1	0.610043	0.587719	0.671111	0.869048		0.621573	0.898324	FALSE	FALSE	700		bin14	0.632479	0.680556	0.358025	0.536585	0.80303	0.522523	0.59596	0.503401	0.642959
bin15	0.547009	0.62069	0.54668	0.666667	0.470588	0.589147	0.753623	0.537634	0.458333	0.4	0.601852	0.540541	0.857348	0.418803	0.626016	0.880952	0.655556	0.382114	0.579917	0.540541	0.57378	0.823529	0.435185	0.624081	0.505051	0.646465	0.589147	0.960784	0.608333	0.622807	0.653333	0.842593		0.611222	0.95354	FALSE	FALSE	750		bin15	0.632479	0.666667	0.345679	0.528455	0.80303	0.477477	0.505051	0.503401	0.633133
bin16	0.470085	0.551724	0.546013	0.589744	0.460784	0.565891	0.731884	0.494624	0.479268	0.391667	0.611111	0.603604	0.8125	0.393162	0.606504	0.759388	0.54023	0.333333	0.529412	0.504505	0.524197	0.666667	0.444444	0.595238	0.484848	0.646465	0.601513	0.803922	0.591667	0.552632	0.657778	0.740741		0.571423	0.660098	FALSE	FALSE	800		bin16	0.589744	0.638889	0.417854	0.520325	0.818182	0.396396	0.484848	0.47619	0.618368
bin17	0.432265	0.494253	0.510204	0.42735	0.401961	0.534884	0.695652	0.473118	0.471545	0.391667	0.657407	0.612011	0.729167	0.384615	0.537419	0.64518	0.528736	0.349593	0.519608	0.495238	0.471535	0.637255	0.444444	0.587302	0.494949	0.616162	0.58601	0.696078	0.525	0.535088	0.652778	0.625926		0.536387	0.708396	FALSE	FALSE	850		bin17	0.478632	0.555556	0.405033	0.520325	0.795455	0.405405	0.464646	0.44898	0.594595
bin18	0.441667	0.399836	0.503401	0.384615	0.392157	0.472868	0.673913	0.451613	0.463415	0.333333	0.611111	0.615385	0.670027	0.393162	0.512602	0.62079	0.528736	0.363821	0.524658	0.462434	0.461302	0.558824	0.444444	0.619048	0.484848	0.585859	0.542636	0.558824	0.45	0.535088	0.583333	0.580952		0.507022	0.625808	FALSE	FALSE	900		bin18	0.461538	0.48227	0.384615	0.495935	0.757576	0.405405	0.474747	0.442177	0.58037
bin19	0.466667	0.318144	0.52	0.384615	0.421569	0.496124	0.673913	0.430108	0.447154	0.3	0.62037	0.569051	0.609879	0.358974	0.504065	0.61595	0.517241	0.416667	0.5	0.435185	0.439496	0.509804	0.444444	0.626984	0.383838	0.575758	0.472868	0.578431	0.425	0.552632	0.513333	0.561905		0.490318	0.483267	FALSE	FALSE	950		bin19	0.491228	0.468085	0.432099	0.487805	0.710183	0.36036	0.484848	0.435374	0.535088
bin20	0.491667	0.229885	0.506667	0.299145	0.419786	0.51938	0.65942	0.419355	0.430894	0.277137	0.62037	0.561404	0.55914	0.358974	0.496143	0.642857	0.444444	0.458943	0.480095	0.392328	0.458318	0.441176	0.444444	0.634921	0.353535	0.575758	0.41399	0.594177	0.358333	0.587719	0.493333	0.538095		0.473807	0.468732	FALSE	FALSE	1000		bin20	0.491228	0.411348	0.450142	0.442683	0.699856	0.351351	0.484848	0.417659	0.491453
bin21	0.513889	0.203241	0.509249	0.31229	0.386606	0.508029	0.661508	0.387582	0.422538	0.285747	0.629825	0.53545	0.548485	0.356099	0.443974	0.647701	0.370192	0.445694	0.469052	0.366192	0.514251	0.464785	0.419697	0.660714	0.333333	0.614013	0.374944	0.575703	0.380175	0.588495	0.51743	0.5		0.46709	0.407328	FALSE	FALSE	1050		bin21	0.458939	0.372219	0.466387	0.435364	0.679304	0.360974	0.51031	0.388355	0.524267
bin22	0.482895	0.208096	0.516471	0.246439	0.362092	0.502618	0.629592	0.467742	0.394419	0.255405	0.576389	0.548364	0.578965	0.38604	0.475407	0.666667	0.411408	0.430269	0.469994	0.384752	0.439328	0.400735	0.447811	0.65873	0.333333	0.556252	0.382798	0.590074	0.401126	0.503721	0.549517	0.538375		0.462369	0.664683	FALSE	FALSE	1100		bin22	0.446394	0.326176	0.435185	0.383611	0.680264	0.38509	0.463669	0.362812	0.446581
bin23	0.5	0.206897	0.53281	0.188034	0.333333	0.527132	0.644928	0.451613	0.414634	0.316667	0.574074	0.596491	0.541667	0.410256	0.4518	0.642857	0.408602	0.414634	0.490196	0.37963	0.47619	0.382353	0.444444	0.666667	0.313131	0.585859	0.395349	0.568627	0.408333	0.5	0.583333	0.514286		0.464526	0.860034	FALSE	FALSE	1150		bin23	0.447368	0.308857	0.419753	0.406504	0.661836	0.407407	0.494949	0.394558	0.435897
bin24	0.5	0.241379	0.555556	0.179487	0.343137	0.531192	0.637681	0.451613	0.439024	0.3	0.547354	0.587719	0.541667	0.418803	0.411537	0.579365	0.47379	0.422764	0.439988	0.435185	0.47619	0.382353	0.444444	0.666667	0.282828	0.606061	0.390735	0.539216	0.416667	0.517544	0.560598	0.514286		0.463589	0.937216	FALSE	FALSE	1200		bin24	0.401849	0.321256	0.407407	0.447154	0.659259	0.381882	0.545455	0.394558	0.401709
bin25	0.5	0.241379	0.562092	0.17094	0.352941	0.527132	0.586957	0.451613	0.439024	0.308333	0.527778	0.614035	0.5625	0.461538	0.422929	0.507937	0.489583	0.463415	0.460784	0.490741	0.5	0.362745	0.444444	0.650794	0.252525	0.575758	0.365079	0.529412	0.4	0.535088	0.549858	0.529412		0.463649	0.591836	FALSE	FALSE	1250		bin25	0.414414	0.333333	0.407407	0.463415	0.592593	0.381882	0.545455	0.408163	0.376068
bin26	0.5	0.241379	0.568627	0.179487	0.323529	0.51938	0.550725	0.451613	0.341463	0.324786	0.527778	0.704599	0.5625	0.387764	0.365079	0.467673	0.489583	0.422764	0.45098	0.524354	0.475416	0.284314	0.453704	0.626984	0.252525	0.575758	0.230159	0.460784	0.408333	0.535088	0.557949	0.480392		0.445171	0.333984	FALSE	FALSE	1300		bin26	0.423423	0.333333	0.400285	0.455285	0.577778	0.378378	0.535354	0.414966	0.282051
bin27	0.516667	0.244253	0.568627	0.213675	0.330065	0.534884	0.514493	0.483871	0.325203	0.34188	0.490741	0.935936	0.46875	0.374044	0.34127	0.415989	0.451509	0.495935	0.372549	0.558824	0.438399	0.180036	0.518519	0.626016	0.363636	0.515152	0.171835	0.156863	0.383333	0.54386	0.472778	0.40404		0.429801	0.109384	FALSE	FALSE	1350		bin27	0.392603	0.29798	0.358805	0.406504	0.637037	0.342342	0.494949	0.380952	0.230769
bin28	0.491667	0.238095	0.620915	0.239316	0.30303	0.651163	0.507246	0.467025	0.406504	0.290598	0.462963	0.942857	0.354167	0.421053	0.33043	0.396825	0.409612	0.471545	0.294118	0.539216	0.495726	0.171717	0.537037	0.617886	0.434343	0.444444	0.214286	0.156863	0.366667	0.552632	0.423889	0.401961		0.426744	0.0431736	TRUE	FALSE	1400		bin28	0.368421	0.183404	0.25	0.341463	0.654428	0.18018	0.565657	0.340136	0.299145
bin29	0.508333	0.178571	0.658039	0.25641	0.353535	0.703027	0.514493	0.439427	0.520325	0.34188	0.5	0.942857	0.385417	0.45614	0.370693	0.420635	0.482759	0.471545	0.264706	0.52328	0.504274	0.212121	0.555556	0.601626	0.555556	0.424242	0.248062	0.138443	0.4	0.552632	0.361111	0.451821		0.446797	0.0196941	TRUE	FALSE	1450		bin29	0.345254	0.125926	0.207231	0.252033	0.644928	0.117117	0.575758	0.333333	0.452991
bin30	0.55	0.124881	0.715489	0.307692	0.464646	0.79849	0.528986	0.473118	0.658537	0.461538	0.574074	0.981217	0.347446	0.587719	0.382269	0.539683	0.607143	0.536585	0.245098	0.616001	0.508547	0.29577	0.62963	0.583333	0.626263	0.424242	0.27907	0.121212	0.416667	0.587719	0.361111	0.574868		0.497158	0.00085682	TRUE	TURE	1500		bin30	0.512821	0.0916451	0.202381	0.131098	0.608696	0.133333	0.535354	0.340136	0.632479
bin31	0.516667	0.217949	0.773133	0.478632	0.73975	0.925386	0.427536	0.483871	0.731707	0.623932	0.666667	1	0.408602	0.695682	0.478846	0.608595	0.674603	0.609756	0.352941	0.681004	0.595528	0.387311	0.62037	0.625	0.757576	0.525253	0.457364	0.20202	0.458333	0.684211	0.376812	0.666667		0.576616	1.15511e-05	TRUE	TURE	1550		bin31	0.57265	0.107814	0.214286	0.157114	0.568921	0.114286	0.551452	0.346939	0.692308
bin32	0.474123	0.371795	0.778211	0.65812	0.72549	0.957265	0.42029	0.494994	0.756098	0.828829	0.771429	1	0.537634	0.74765	0.707152	0.716667	0.825736	0.674797	0.588235	0.693487	0.7	0.575758	0.592593	0.672661	0.817428	0.555556	0.635659	0.525253	0.566667	0.789474	0.560606	0.740741		0.670637	2.76449e-08	TRUE	TURE	1600		bin32	0.555556	0.117043	0.166667	0.216667	0.42963	0.155742	0.648387	0.352053	0.692308
bin33	0.473684	0.535	0.731998	0.811966	0.699941	0.947593	0.522069	0.530472	0.75	0.873874	0.731692	1	0.689655	0.773077	0.71282	0.747866	0.888744	0.704326	0.705882	0.67893	0.825	0.643308	0.518519	0.755623	0.800082	0.656566	0.763372	0.636364	0.641667	0.859649	0.651515	0.698479		0.717492	1.83679e-10	TRUE	TURE	1650		bin33	0.555556	0.207139	0.29784	0.361752	0.362963	0.245711	0.584025	0.320346	0.632479
bin34	0.461538	0.611111	0.689484	0.846531	0.667161	0.852069	0.565286	0.540598	0.75	0.833333	0.717522	1	0.721264	0.823516	0.735165	0.768519	0.90303	0.762045	0.754902	0.660021	0.808333	0.753257	0.509259	0.662149	0.876522	0.707071	0.840385	0.717172	0.601496	0.833333	0.681159	0.687948		0.729412	8.03725e-11	TRUE	TURE	1700		bin34	0.543185	0.448579	0.352778	0.457257	0.36562	0.361111	0.488095	0.317073	0.46893
bin35	0.508772	0.769104	0.748239	0.819024	0.690643	0.728985	0.583459	0.550725	0.758449	0.823529	0.75	1	0.719136	0.782302	0.744444	0.898815	0.866667	0.750694	0.784314	0.632353	0.762398	0.833333	0.590476	0.630556	0.857937	0.636364	0.910331	0.79798	0.578947	0.807018	0.703463	0.65873		0.739912	4.97995e-11	TRUE	TURE	1750		bin35	0.55761	0.579512	0.408325	0.466346	0.33033	0.389569	0.414625	0.33926	0.388574
bin36	0.570175	0.903968	0.75493	0.818964	0.701448	0.641503	0.582973	0.552042	0.733478	0.768481	0.618661	1	0.662088	0.699778	0.693298	0.964255	0.777319	0.725926	0.77451	0.801587	0.73491	0.818462	0.62587	0.634058	0.916667	0.656566	0.871119	0.848485	0.586363	0.822902	0.730159	0.623077		0.737938	4.62798e-10	TRUE	TURE	1800		bin36	0.594595	0.717736	0.5625	0.432018	0.28739	0.462906	0.424242	0.304762	0.219345
bin37	0.54955	0.919697	0.711706	0.770996	0.693288	0.612963	0.688306	0.557143	0.66168	0.775485	0.59537	1	0.643116	0.723104	0.743377	0.92303	0.766807	0.656876	0.79798	0.916667	0.711485	0.84127	0.529146	0.593053	1	0.634857	0.868465	0.868687	0.628571	0.801802	0.720635	0.625121		0.73532	4.79481e-09	TRUE	TURE	1850		bin37	0.603604	0.818861	0.622619	0.490196	0.218651	0.357576	0.438344	0.279146	0.120139
bin38	0.504505	0.890414	0.794444	0.69213	0.59179	0.677778	0.70936	0.517544	0.630592	0.782334	0.666667	1	0.750361	0.771852	0.725071	0.926786	0.814103	0.618717	0.861156	1	0.706845	0.819853	0.70471	0.550514	1	0.611111	0.827778	0.887942	0.589718	0.771304	0.739644	0.636739		0.742867	1.28443e-10	TRUE	TURE	1900		bin38	0.431272	0.815686	0.452778	0.30202	0.249554	0.301587	0.395833	0.297347	0.108466
bin39	0.601749	0.844156	0.840741	0.760739	0.484848	0.72381	0.762281	0.509804	0.570893	0.778211	0.652681	1	0.745614	0.642899	0.680556	0.9375	0.742424	0.641997	0.86685	1	0.681746	0.852137	0.814789	0.566239	1	0.633333	0.820513	0.903226	0.675214	0.777672	0.781944	0.619643		0.747319	2.61894e-10	TRUE	TURE	1950		bin39	0.418182	0.788112	0.339683	0.306349	0.198413	0.633333	0.369048	0.309942	0.126812
bin40	0.677083	0.812121	0.84127	0.684091	0.433333	0.766667	0.691434	0.487179	0.514087	0.726522	0.663889	1	0.714286	0.512759	0.681818	0.885714	0.638889	0.781145	0.665501	1	0.666667	0.8	0.83569	0.433862	1	0.579693	0.972222	0.877508	0.785628	0.79064	0.65812	0.621795		0.724988	2.54867e-09	TRUE	TURE	2000		bin40	0.382716	0.638889	0.5	0.333333	0.147619	1	0.383838	0.26206	0.113519
bin41	0.683242	0.921296	0.822222	0.644444	0.505291	0.694444	0.693627	0.5	0.593254	0.639423	0.466667	1	0.725275	0.364924	0.680033	0.783838	0.375	0.851852	0.572631	1	0.686869	0.687831	0.884259	0.555556	NaN	0.571429	1	0.856459	0.762478	0.765238	0.604701	0.636364		0.694473	2.86536e-10	TRUE	TURE	2050		bin41	0.402051	0.626984	0.333333	0.233333	0	NaN	0.457672	0.2	0.174074
bin42	0.616162	1	0.866667	0.5	0.547619	0.555556	0.544017	0.537037	0.68254	0.796296	0.722222	1	0.686325	0.482143	0.752646	0.68254	0.305556	0.85	0.487179	NaN	0.597222	0.466667	0.869048	0.133333	NaN	0.689103	1	0.895308	0.757265	0.75319	0.679293	0.74127		0.673207	9.88162e-09	TRUE	TURE	2100		bin42	0.431746	0.4	0.444444	0.166667	0	NaN	0.2	0.245238	0.152778
bin43	0.648435	1	1	0.666667	0.466667	0.666667	0.340909	0.391534	0.311111	0.855159	1	1	0.589286	0.612388	0.680342	0.566667	0.444444	1	0.421212	NaN	0.493506	0.5	0.822222	0	NaN	0.710145	1	0.918415	0.867521	0.752646	0.742424	0.68254		0.671697	5.50028e-06	TRUE	TURE	2150		bin43	0.33878	0.4	0.5	0	NaN	NaN	0.333333	0.355556	0.25
bin44	0.581818	1	1	0.444444	0.444444	1	0.7	0.31746	0.5	0.933333	NaN	1	0.557143	0.632143	0.503367	0.555556	0.6	1	0.722222	NaN	0.484848	0.555556	0.933333	0.333333	NaN	0.779315	1	0.877381	0.804714	0.707071	0.873677	0.666667		0.707166	3.65914e-06	TRUE	TURE	2200		bin44	0.343434	0.177778	0.5	0	NaN	NaN	0.466667	0.533333	0
bin45	0.644444	1	1	0.333333	0.444444	1	0.777778	0.261111	0.75	1	NaN	NaN	0.666667	0.577778	0.589286	0.777778	0.7	1	0.6	NaN	0.589286	0.555556	0.75	0.5	NaN	0.769856	1	0.896825	0.666667	0.817593	0.885714	0.733333		0.724552	4.63192e-06	TRUE	TURE	2250		bin45	0.301587	0.111111	0.5	0	NaN	NaN	0.666667	0.388889	0
bin46	0.888889	1	1	1	0.5	1	1	0.305556	NaN	1	NaN	NaN	0.777778	0.611111	0.428571	1	0.694444	0.666667	0.5	NaN	0.644444	0.333333	0.75	1	NaN	0.693627	1	1	0.559524	0.75	0.8	0.588889		0.758994	1.54972e-06	TRUE	TURE	2300		bin46	0.577778	0	0.5	0	NaN	NaN	0.666667	0.333333	0
bin47	1	NaN	1	1	1	NaN	NaN	0.444444	NaN	NaN	NaN	NaN	0.666667	1	0.387302	1	0.833333	0	1	NaN	1	0	0.722222	1	NaN	0.695416	NaN	1	0.428571	0.777778	0.8	0.666667		0.746473	0.00377649	TRUE	FALSE	2350		bin47	1	0	1	NaN	NaN	NaN	0.666667	0.666667	0
bin48	1	NaN	0	1	NaN	NaN	NaN	0.5	NaN	NaN	NaN	NaN	0	1	0.3	1	1	0	1	NaN	NaN	0	0.666667	NaN	NaN	0.801587	NaN	1	0.411111	1	0.916667	0.555556		0.639557	0.0142912	TRUE	FALSE	2400		bin48	1	0	NaN	NaN	NaN	NaN	NaN	0	NaN
bin49	NaN	NaN	0	1	NaN	NaN	NaN	0	NaN	NaN	NaN	NaN	0	NaN	0.25	1	1	NaN	NaN	NaN	NaN	0.333333	1	NaN	NaN	0.933333	NaN	NaN	0.5	1	1	0.5		0.608333	0.00976068	TRUE	FALSE	2450		bin49	NaN	0	NaN	NaN	NaN	NaN	NaN	0	NaN
bin50	NaN	NaN	0	NaN	NaN	NaN	NaN	0	NaN	NaN	NaN	NaN	0	NaN	0	NaN	NaN	NaN	NaN	NaN	NaN	1	1	NaN	NaN	1	NaN	NaN	1	1	1	0.666667		0.606061	0.107939	FALSE	FALSE	2500		bin50	NaN	0	NaN	NaN	NaN	NaN	NaN	NaN	NaN
AVE																																								AVE
DL GOOD																																								DL GOOD
CUED	S1	S2	S3	S5	S6	S7	S8	S9	S11	S12	S13	S14	S15	S16	S17	S18	S20	S22	S23	S24	S25	S26	S27	S30	S31	S32	S33	S34	S35	S37	S38	S39			T-test			time (ms)		UNCUED	S1	S2	S3	S5	S6	S7	S8	S9	S11
bin1	0.486486	0.357143	0.566919	0.447368	0.341463	0.666667	0.542636	0.483871	0.564103	0.49187	0.451852	0.457143	0.421545	0.538462	0.363636	0.440285	0.390244	0.65	0.54386	0.409959	0.401852	0.416667	0.563218	0.631579	0.512346	0.513514	0.486955	0.542636	0.5	0.527132	0.566667	0.450089		0.491505	0.65278	FALSE	FALSE	50		bin1	0.416667	0.634944	0.481954	0.504065	0.482906	0.493333	0.485714	0.75	0.454472
bin2	0.486486	0.345238	0.566919	0.473684	0.365854	0.611111	0.55814	0.494624	0.564103	0.528455	0.452328	0.447619	0.425	0.538462	0.381629	0.484848	0.338821	0.675	0.526316	0.45	0.447619	0.441441	0.574713	0.622807	0.54321	0.5	0.487179	0.51938	0.470588	0.51938	0.566667	0.405823		0.49417	0.530619	FALSE	FALSE	100		bin2	0.425	0.622222	0.453901	0.544715	0.478632	0.506667	0.514286	0.75	0.479675
bin3	0.468468	0.321429	0.575758	0.526316	0.357724	0.555556	0.51938	0.483871	0.591093	0.479675	0.414815	0.466667	0.414634	0.538462	0.393939	0.555556	0.341667	0.675	0.526316	0.466667	0.466667	0.468468	0.551724	0.630631	0.540531	0.5	0.495726	0.550388	0.441176	0.527132	0.65812	0.454545		0.498691	0.537395	FALSE	FALSE	150		bin3	0.45	0.631481	0.468085	0.544715	0.504274	0.5	0.457143	0.75	0.447154
bin4	0.495495	0.333333	0.575758	0.526316	0.390244	0.544444	0.527132	0.510753	0.582546	0.44367	0.398551	0.431373	0.390244	0.538462	0.414141	0.573975	0.353205	0.666667	0.527027	0.471545	0.513757	0.513514	0.541051	0.615932	0.584906	0.526316	0.478632	0.55814	0.490196	0.503876	0.65812	0.424242		0.503236	0.448925	FALSE	FALSE	200		bin4	0.45	0.628788	0.411348	0.520325	0.525866	0.52	0.457143	0.75	0.475401
bin5	0.54955	0.349206	0.575758	0.561404	0.430894	0.6	0.550388	0.532258	0.709402	0.504065	0.459259	0.363636	0.365408	0.581197	0.5776	0.693999	0.566667	0.790385	0.567568	0.738008	0.703704	0.612613	0.546388	0.587719	0.54717	0.561404	0.530589	0.589147	0.509804	0.496124	0.666667	0.444444		0.558201	0.788526	FALSE	FALSE	250		bin5	0.5	0.62963	0.432624	0.569106	0.565677	0.533333	0.466667	0.75	0.615385
bin6	0.630631	0.678571	0.626263	0.693694	0.520325	0.766667	0.589147	0.548387	0.818938	0.823074	0.695652	0.393939	0.444444	0.623932	0.676768	0.869875	0.778252	0.846154	0.598151	0.835772	0.816567	0.882883	0.632184	0.666667	0.577335	0.675439	0.683761	0.713178	0.578431	0.496124	0.726496	0.515152		0.669464	0.918785	FALSE	FALSE	300		bin6	0.62265	0.733333	0.446809	0.690476	0.74573	0.7	0.552381	0.75	0.717949
bin7	0.783784	0.916667	0.636364	0.831437	0.691057	0.866667	0.697674	0.532258	0.833333	0.953488	0.825121	0.424242	0.658537	0.666667	0.919786	0.911765	0.885569	0.85	0.614035	0.933333	0.927928	0.972973	0.655172	0.745614	0.72327	0.666667	0.871795	0.844961	0.715686	0.496124	0.811966	0.59596		0.764372	0.452821	FALSE	FALSE	350		bin7	0.814957	0.814815	0.457293	0.896825	0.811966	0.778503	0.571429	0.75	0.726496
bin8	0.805556	0.91954	0.646465	0.947368	0.772358	0.897701	0.775194	0.526882	0.850877	1	0.933333	0.484848	0.829268	0.700855	1	0.980392	0.975	0.866667	0.622807	0.974359	0.981982	0.972973	0.643678	0.736842	0.798742	0.710526	0.940171	0.968992	0.735294	0.488372	0.940171	0.764706		0.818497	0.0920143	FALSE	FALSE	400		bin8	0.848932	0.911111	0.485661	0.97619	0.846154	0.778503	0.704762	0.75	0.747863
bin9	0.828829	0.963678	0.666667	0.973684	0.801291	0.907964	0.75969	0.548387	0.846154	1	0.948148	0.494949	0.837398	0.717949	1	0.980952	0.944057	0.9	0.614035	0.974359	1	0.963964	0.678161	0.754386	0.836478	0.745614	0.948718	1	0.735294	0.479655	0.948268	0.838384		0.83241	0.108897	FALSE	FALSE	450		bin9	0.870445	0.95303	0.485661	1	0.846931	0.799394	0.761905	0.75	0.744215
bin10	0.872129	0.968567	0.576775	0.980238	0.811315	0.893519	0.749188	0.54149	0.824013	1	0.94951	0.527454	0.817088	0.735497	1	1	0.93665	0.866491	0.626419	0.979959	1	0.968769	0.636243	0.693796	0.839776	0.734503	0.918902	1	0.749346	0.470593	0.909096	0.880411		0.826804	0.300337	FALSE	FALSE	500		bin10	0.863539	0.959559	0.450948	1	0.835675	0.821254	0.734921	0.815873	0.753081
bin11	0.822926	0.873563	0.636364	0.970962	0.811382	0.887739	0.75051	0.60584	0.790185	1	0.985185	0.588384	0.850356	0.70914	1	0.990476	0.921131	0.837037	0.644878	0.94359	0.990196	0.969636	0.739169	0.67723	0.843816	0.699491	0.675214	1	0.786275	0.465116	0.906836	0.90368		0.821135	0.0311757	TRUE	FALSE	550		bin11	0.85098	0.947475	0.440551	1	0.844804	0.793333	0.778571	0.722222	0.735117
bin12	0.837838	0.816092	0.575758	0.982456	0.853659	0.844444	0.782946	0.607527	0.717949	1	1	0.59596	0.85	0.75	1	0.933333	0.934959	0.775	0.657895	0.930949	0.887626	0.954955	0.724138	0.649573	0.836478	0.692982	0.529915	1	0.754902	0.457364	0.877193	0.930481		0.804449	0.0430393	TRUE	FALSE	600		bin12	0.85	0.877562	0.411348	0.97619	0.846154	0.793333	0.771429	0.75	0.715447
bin13	0.846847	0.743842	0.557511	0.885965	0.837398	0.833333	0.751938	0.602151	0.625731	0.97656	1	0.535354	0.85	0.683333	0.990741	0.885714	0.943089	0.641667	0.631579	0.821005	0.791667	0.981982	0.712644	0.606838	0.811321	0.701754	0.470085	0.984496	0.686275	0.465116	0.837838	0.900178		0.768561	0.173018	FALSE	FALSE	650		bin13	0.847436	0.782609	0.446809	0.920635	0.871795	0.686667	0.809524	0.75	0.707317
bin14	0.801802	0.72619	0.546402	0.868421	0.804878	0.788889	0.713178	0.580645	0.60716	0.976744	0.985185	0.555556	0.858333	0.644017	0.972222	0.790476	0.94367	0.583333	0.596491	0.675676	0.739583	0.962963	0.62069	0.615385	0.811321	0.657895	0.42735	0.953488	0.676471	0.426357	0.821242	0.909982		0.738812	0.320038	FALSE	FALSE	700		bin14	0.824561	0.724638	0.474869	0.880952	0.846154	0.626667	0.828571	0.75	0.650407
bin15	0.756757	0.678571	0.545455	0.850877	0.804878	0.666667	0.697674	0.569892	0.594595	0.97619	0.977778	0.578431	0.844106	0.641026	0.972222	0.780952	0.928571	0.575	0.578947	0.675676	0.729167	0.89965	0.597701	0.606838	0.798742	0.675439	0.358974	0.899225	0.676471	0.465116	0.789474	0.892157		0.721351	0.224041	FALSE	FALSE	750		bin15	0.808592	0.688406	0.474869	0.833333	0.871795	0.62	0.809524	0.6875	0.634146
bin16	0.684685	0.654762	0.515152	0.669037	0.737602	0.388889	0.674419	0.575269	0.513514	0.9506	0.884058	0.607843	0.810391	0.606838	0.914488	0.714286	0.896825	0.566667	0.535088	0.618534	0.632575	0.720721	0.517241	0.586145	0.72956	0.631579	0.333333	0.604651	0.627451	0.465116	0.657895	0.696078		0.64754	0.536186	FALSE	FALSE	800		bin16	0.606838	0.550725	0.456039	0.650794	0.853351	0.553333	0.809524	0.6875	0.601626
bin17	0.567568	0.469577	0.505376	0.552632	0.675	0.288889	0.620155	0.580645	0.378378	0.836707	0.746377	0.569816	0.767662	0.547009	0.801545	0.657143	0.830623	0.525	0.508772	0.313675	0.589153	0.603604	0.482759	0.561404	0.560353	0.570175	0.324786	0.434109	0.519608	0.472868	0.631579	0.460784		0.561054	0.559536	FALSE	FALSE	850		bin17	0.367521	0.449275	0.456522	0.555556	0.833333	0.486667	0.771429	0.6875	0.398374
bin18	0.504505	0.374169	0.52621	0.491228	0.566667	0.269732	0.565891	0.602151	0.363614	0.740463	0.601449	0.565657	0.666667	0.504274	0.701389	0.638095	0.853659	0.466667	0.5	0.308333	0.518519	0.504505	0.482759	0.552632	0.477124	0.491228	0.324786	0.356589	0.490196	0.527132	0.605263	0.303922		0.513921	0.586034	FALSE	FALSE	900		bin18	0.263158	0.330471	0.432828	0.552846	0.754386	0.436327	0.771429	0.666667	0.325203
bin19	0.486486	0.24359	0.537634	0.45614	0.471138	0.280843	0.511628	0.591398	0.37037	0.718991	0.507246	0.571654	0.545045	0.461538	0.624242	0.580952	0.804878	0.4	0.473684	0.316667	0.514264	0.477477	0.482759	0.578947	0.385621	0.482456	0.358974	0.310078	0.480392	0.55814	0.592698	0.235294		0.481601	0.584488	FALSE	FALSE	950		bin19	0.25652	0.293266	0.463768	0.56446	0.666667	0.416054	0.695238	0.604167	0.284553
bin20	0.403654	0.299373	0.552162	0.432406	0.453419	0.287575	0.483915	0.58172	0.323466	0.726687	0.481643	0.566919	0.447338	0.448268	0.578431	0.553247	0.773077	0.381579	0.462848	0.279701	0.453947	0.459459	0.482333	0.589669	0.328974	0.508772	0.353351	0.243713	0.460784	0.553935	0.570106	0.239583		0.461314	0.49779	FALSE	FALSE	1000		bin20	0.210961	0.280615	0.432955	0.560976	0.641091	0.388276	0.643978	0.552778	0.295122
bin21	0.409848	0.245869	0.482331	0.383719	0.405724	0.279321	0.528992	0.559446	0.415344	0.678425	0.499763	0.555714	0.453543	0.411064	0.560061	0.596561	0.674468	0.433127	0.476703	0.291904	0.501901	0.457952	0.474235	0.574762	0.320973	0.551552	0.356104	0.187629	0.444928	0.55066	0.585307	0.295971		0.457622	0.254422	FALSE	FALSE	1050		bin21	0.229771	0.237842	0.434248	0.542921	0.644914	0.367584	0.586406	0.57006	0.278431
bin22	0.414414	0.259497	0.461253	0.385965	0.418089	0.3	0.511628	0.537634	0.321862	0.677991	0.442029	0.45098	0.474134	0.418803	0.608961	0.552381	0.586992	0.4	0.526316	0.258333	0.405405	0.441441	0.482759	0.596491	0.308176	0.526316	0.401709	0.248062	0.431373	0.550388	0.552632	0.264706		0.444273	0.471398	FALSE	FALSE	1100		bin22	0.263158	0.253876	0.42029	0.539683	0.637269	0.358373	0.619048	0.541667	0.276423
bin23	0.414414	0.271605	0.494949	0.350877	0.398374	0.266667	0.527132	0.510753	0.315789	0.669444	0.392593	0.441176	0.439946	0.418803	0.542675	0.514286	0.551878	0.391667	0.552632	0.35	0.387387	0.459459	0.482759	0.605263	0.312046	0.508772	0.393162	0.27907	0.411765	0.534884	0.544571	0.284314		0.438097	0.727966	FALSE	FALSE	1150		bin23	0.280702	0.2741	0.391304	0.52381	0.623932	0.355782	0.628571	0.5625	0.268293
bin24	0.378378	0.283951	0.515152	0.394737	0.375	0.277778	0.527132	0.5	0.263158	0.650465	0.362963	0.401961	0.429878	0.418803	0.555556	0.47619	0.507937	0.358333	0.526316	0.358333	0.432432	0.45045	0.482759	0.614035	0.275641	0.517544	0.393162	0.263566	0.411765	0.534884	0.555556	0.303922		0.431179	0.828212	FALSE	FALSE	1200		bin24	0.350877	0.299003	0.422222	0.52381	0.641026	0.36	0.619048	0.583333	0.243902
bin25	0.405405	0.259259	0.535985	0.359649	0.369658	0.388889	0.550388	0.505376	0.236842	0.650794	0.377778	0.5	0.411752	0.403419	0.525253	0.409524	0.463415	0.35	0.517544	0.391667	0.477477	0.423423	0.482759	0.622807	0.24359	0.535088	0.393162	0.294574	0.411765	0.550388	0.555556	0.313725		0.434903	0.509494	FALSE	FALSE	1250		bin25	0.368421	0.323115	0.422222	0.539683	0.617184	0.313333	0.580952	0.583333	0.227642
bin26	0.531532	0.312915	0.530619	0.315789	0.367521	0.511111	0.596899	0.505376	0.138102	0.571429	0.372303	0.764706	0.385163	0.408333	0.465241	0.340056	0.447929	0.258333	0.473684	0.39991	0.5	0.288288	0.511111	0.640351	0.27044	0.54386	0.25641	0.248062	0.362745	0.44186	0.300794	0.343137		0.418875	0.095609	FALSE	FALSE	1300		bin26	0.359649	0.298653	0.412438	0.507937	0.605263	0.233333	0.571429	0.625	0.158333
bin27	0.527528	0.423077	0.515152	0.280702	0.377778	0.663218	0.635659	0.478495	0.205128	0.451413	0.449275	0.911765	0.235772	0.418803	0.408353	0.32381	0.373984	0.258333	0.401612	0.330251	0.514286	0.198198	0.544444	0.605263	0.377358	0.447368	0.162393	0.162791	0.45098	0.418605	0.190476	0.347426		0.409053	0.0339605	TRUE	FALSE	1350		bin27	0.391363	0.2	0.433816	0.396825	0.631579	0.173333	0.533333	0.458333	0.175
bin28	0.583333	0.538462	0.40404	0.280702	0.45	0.744663	0.643411	0.483871	0.393162	0.428571	0.492754	0.941737	0.154472	0.350877	0.42037	0.32381	0.34127	0.308333	0.432432	0.347436	0.542857	0.162162	0.533333	0.610716	0.490566	0.421053	0.179487	0.116279	0.509804	0.418605	0.219048	0.3265		0.424816	0.00593963	TRUE	FALSE	1400		bin28	0.422402	0.190016	0.367794	0.277778	0.608862	0.153333	0.485714	0.479167	0.358333
bin29	0.55005	0.632479	0.383838	0.307018	0.533333	0.823481	0.635659	0.546812	0.754386	0.447929	0.471014	0.941176	0.162602	0.45614	0.45291	0.32381	0.2741	0.425	0.428639	0.376068	0.552381	0.189189	0.511111	0.6001	0.649734	0.412281	0.273504	0.139535	0.627451	0.472868	0.37037	0.352941		0.471185	0.000328706	TRUE	TURE	1450		bin29	0.539586	0.157576	0.326241	0.177313	0.478632	0.184002	0.456583	0.458333	0.660976
bin30	0.495495	0.703704	0.402462	0.315789	0.655894	0.848933	0.589147	0.604731	0.833333	0.371545	0.507246	0.939988	0.181911	0.530364	0.424339	0.409524	0.317073	0.616667	0.45614	0.521604	0.541291	0.327578	0.544444	0.621622	0.704818	0.350877	0.324786	0.170543	0.636364	0.527132	0.5	0.45098		0.513323	1.38388e-05	TRUE	TURE	1500		bin30	0.617868	0.127223	0.242831	0.169377	0.410256	0.212766	0.366013	0.533333	0.731707
bin31	0.486486	0.790123	0.570391	0.447368	0.642276	0.821429	0.492063	0.652951	0.842105	0.365854	0.64219	0.950089	0.353632	0.564103	0.490476	0.514557	0.407269	0.733333	0.544808	0.666667	0.54955	0.580159	0.6	0.630631	0.785622	0.429825	0.470085	0.27907	0.714015	0.589147	0.638889	0.5		0.585786	5.70359e-07	TRUE	TURE	1550		bin31	0.564815	0.177763	0.227273	0.206349	0.376068	0.244835	0.363636	0.533333	0.747967
bin32	0.449449	0.70716	0.69798	0.573323	0.634146	0.915344	0.41928	0.645935	0.850877	0.460317	0.598007	0.969381	0.641026	0.666667	0.540115	0.630824	0.544715	0.75406	0.585586	0.709524	0.582082	0.784314	0.511111	0.574457	0.760774	0.535088	0.65812	0.472868	0.676768	0.674419	0.740741	0.699941		0.645762	3.6263e-08	TRUE	TURE	1600		bin32	0.555556	0.282617	0.155952	0.261905	0.371503	0.325926	0.444444	0.463248	0.731707
bin33	0.462963	0.552308	0.77381	0.679739	0.633333	0.786667	0.463206	0.662132	0.836257	0.577889	0.611723	0.989583	0.82906	0.701754	0.66015	0.755556	0.666667	0.820465	0.567568	0.704138	0.504497	0.822044	0.511111	0.564198	0.711769	0.622807	0.811966	0.713178	0.707071	0.682171	0.75	0.744949		0.683773	2.59059e-08	TRUE	TURE	1650		bin33	0.54709	0.348049	0.158639	0.282957	0.36036	0.369228	0.449179	0.426068	0.650407
bin34	0.472222	0.460245	0.76954	0.636364	0.632479	0.691667	0.478401	0.649899	0.728632	0.593496	0.669658	1	0.871795	0.740196	0.666804	0.86143	0.739744	0.815007	0.558559	0.697619	0.578078	0.873574	0.6	0.550725	0.778352	0.684211	0.845517	0.767442	0.535354	0.72093	0.777778	0.763262		0.694031	1.43346e-07	TRUE	TURE	1700		bin34	0.528307	0.374206	0.214852	0.409314	0.393362	0.314806	0.468056	0.444444	0.414634
bin35	0.444444	0.346405	0.806349	0.70619	0.637032	0.580482	0.490998	0.599903	0.672751	0.669512	0.732338	1	0.805498	0.709559	0.710758	0.945874	0.738857	0.779259	0.587337	0.685802	0.55005	0.886508	0.643377	0.593478	0.740385	0.666667	0.796452	0.79845	0.398827	0.750097	0.766667	0.738697		0.686844	2.53656e-06	TRUE	TURE	1750		bin35	0.536286	0.408208	0.164377	0.502404	0.447325	0.312727	0.469987	0.421296	0.294756
bin36	0.481481	0.461538	0.835714	0.786869	0.637835	0.631535	0.48482	0.565591	0.607903	0.660965	0.710655	1	0.879261	0.678765	0.653846	0.948246	0.757143	0.792569	0.62037	0.590013	0.509524	0.909841	0.690476	0.678363	0.390476	0.657895	0.767319	0.851606	0.291954	0.770325	0.729947	0.682981		0.67862	1.88722e-05	TRUE	TURE	1800		bin36	0.54955	0.343434	0.063196	0.544827	0.47619	0.241979	0.526667	0.363095	0.238009
bin37	0.481481	0.418609	0.796405	0.761544	0.670383	0.529101	0.361821	0.569651	0.573489	0.725225	0.594841	1	0.755732	0.779822	0.637702	0.981481	0.703387	0.754386	0.592593	0.573232	0.459893	0.924837	0.675214	0.614379	0	0.640351	0.745643	0.873016	0.308471	0.765407	0.706028	0.726614		0.646898	0.000274031	TRUE	TURE	1850		bin37	0.57174	0.272727	0.114815	0.447368	0.473529	0.294444	0.576561	0.301587	0.215982
bin38	0.595316	0.337037	0.745643	0.711329	0.72201	0.755556	0.37296	0.594444	0.632275	0.792496	0.539683	1	0.692991	0.858442	0.68	0.97619	0.657778	0.701058	0.575498	0.703704	0.451232	0.832168	0.714372	0.607026	0	0.66074	0.835979	0.888115	0.370556	0.792793	0.703704	0.659148		0.661257	6.94948e-05	TRUE	TURE	1900		bin38	0.513447	0.257407	0.238095	0.391063	0.387179	0.194444	0.6	0.333333	0.195527
bin39	0.684028	0.166667	0.90293	0.624771	0.881313	0.722222	0.433551	0.564597	0.543322	0.803449	0.604747	1	0.671937	0.84951	0.605676	0.909091	0.758838	0.741259	0.622762	0.714286	0.441941	0.747727	0.671717	0.678788	0	0.720106	0.819444	0.956768	0.580262	0.826797	0.737417	0.464957		0.67034	1.331e-05	TRUE	TURE	1950		bin39	0.433802	0.186508	0.251166	0.30202	0.278571	0.222222	0.60989	0.355556	0.189377
bin40	0.677419	0.0555556	0.878283	0.561448	0.874074	0.611111	0.466264	0.579487	0.518519	0.786853	0.699755	1	0.622222	0.72105	0.641414	0.882011	0.778947	0.69798	0.684615	0.755556	0.458333	0.557143	0.598901	0.666667	NaN	0.791789	0.777778	0.943355	0.616667	0.799405	0.575158	0.387879		0.666633	3.03773e-07	TRUE	TURE	2000		bin40	0.255176	0.25	0.372391	0.402778	0.383333	0	0.686869	0.444444	0.166667
bin41	0.748858	0.333333	0.800505	0.589286	0.722222	0	0.502525	0.579487	0.77381	0.638889	0.594017	1	0.60636	0.518519	0.705556	0.84127	0.66336	0.68254	0.686482	1	0.53824	0.333333	0.545455	0.486111	NaN	0.776273	0.75	0.893915	0.775707	0.835708	0.531025	0.466667		0.642563	1.33406e-06	TRUE	TURE	2050		bin41	0.285354	0.555556	0.315476	0.666667	0.25	0	0.684524	0.5	0.224868
bin42	0.804944	0.555556	0.792593	0.738889	0.666667	NaN	0.441077	0.407407	0.777778	0.5	0.551852	NaN	0.590049	0.47619	0.70696	0.811111	0.53367	0.333333	0.745643	1	0.626213	0	0.458333	0.411111	NaN	0.733827	0.888889	0.787676	0.847024	0.837414	0.621242	0.416005		0.622809	8.45041e-07	TRUE	TURE	2100		bin42	0.231203	0.166667	0.411111	0.555556	0.0833333	0	1	0.166667	0.0666667
bin43	0.839035	0.644444	0.863095	1	0.5	NaN	0.458333	0.355556	0.666667	0.5	0.222222	NaN	0.791246	0.531746	0.592593	0.8	0.428571	0.666667	0.771164	1	0.714744	0	0.622222	0.916667	NaN	0.756313	0	0.796157	0.909544	0.871212	0.675622	0.365079		0.629617	1.79597e-06	TRUE	TURE	2150		bin43	0.230409	1	0.533333	0.5	0	0	1	0	0
bin44	0.839683	0.166667	0.644444	1	0.166667	NaN	0.566667	0.466667	0.5	0.540598	0	NaN	0.741402	0.722222	0.533333	0.766667	0.5	1	0.67619	1	0.675214	0	0.916667	0.888889	NaN	0.728154	0	0.753021	0.730159	0.94104	0.8	0.377778		0.608349	6.97474e-05	TRUE	TURE	2200		bin44	0.217664	1	0.25	NaN	0	NaN	0.833333	0.666667	0
bin45	0.915344	0	0.5	1	0	NaN	0.555556	0.5	0.666667	0.545455	0	NaN	0.490476	0.583333	0.555556	0.75	0.466667	NaN	0.277778	1	0.52381	NaN	1	1	NaN	0.711289	0	0.838889	0.711111	0.927579	0.804714	0.5		0.586082	0.000708909	TRUE	TURE	2250		bin45	0	1	NaN	NaN	0	NaN	0.75	NaN	0
bin46	1	0	0.888889	1	0	NaN	0.833333	0.5	1	0.746032	NaN	NaN	0.25	1	0.333333	0.638889	0.766667	NaN	0	NaN	0.4	NaN	NaN	0	NaN	0.775926	0	0.90303	0.888889	1	0.689815	0.75		0.598533	0.00115639	TRUE	FALSE	2300		bin46	0.0833333	1	0	NaN	NaN	NaN	0.611111	NaN	0
bin47	1	0	0	NaN	0	NaN	1	0.5	1	0.722222	NaN	NaN	0.111111	NaN	0.111111	0.666667	1	NaN	0	NaN	0.6	NaN	NaN	0	NaN	0.916667	0	0.869048	0.5	1	0.8	1		0.536219	0.00939797	TRUE	FALSE	2350		bin47	0.416667	1	0	NaN	NaN	NaN	0.666667	NaN	0
bin48	NaN	0	0	NaN	0	NaN	1	0.5	NaN	1	NaN	NaN	0	NaN	0	1	1	NaN	NaN	NaN	0.866667	NaN	NaN	0	NaN	1	0.333333	0.722222	NaN	1	0.783333	1		0.566975	0.07678	FALSE	FALSE	2400		bin48	0.5	1	0	NaN	NaN	NaN	1	NaN	NaN
bin49	NaN	0	NaN	NaN	1	NaN	1	0	NaN	1	NaN	NaN	0	NaN	NaN	1	1	NaN	NaN	NaN	1	NaN	NaN	NaN	NaN	1	1	1	NaN	1	0.555556	1		0.77037	0.0746001	FALSE	FALSE	2450		bin49	0	1	NaN	NaN	NaN	NaN	NaN	NaN	NaN
bin50	NaN	NaN	NaN	NaN	NaN	NaN	1	0	NaN	NaN	NaN	NaN	0.333333	NaN	NaN	1	NaN	NaN	NaN	NaN	1	NaN	NaN	NaN	NaN	1	NaN	1	NaN	NaN	0.5	NaN		0.729167	0.0377496	TRUE	FALSE	2500		bin50	0	NaN	NaN	NaN	NaN	NaN	NaN	NaN	NaN
AVE																																								AVE
DL BAD																																								DL BAD
CUED	S1	S2	S3	S5	S6	S7	S8	S9	S11	S12	S13	S14	S15	S16	S17	S18	S20	S22	S23	S24	S25	S26	S27	S30	S31	S32	S33	S34	S35	S37	S38	S39			T-test			time (ms)		UNCUED	S1	S2	S3	S5	S6	S7	S8	S9	S11
bin1	0.560606	0.25	0.686275	0.505376	0.56	0.75	0.585185	0.266667	0.381313	0.477778	0.508333	0.423656	0.398599	0.53125	0.52381	0.393939	0.52437	0.681818	0.473684	0.450193	0.46875	0.553862	0.578078	0.585586	0.47619	0.570175	0.507246	0.62037	0.418803	0.569892	0.630125	0.581197		0.51541	0.15669	FALSE	FALSE	50		bin1	0.411765	0.479532	0.433655	0.5	0.390805	0.4	0.592157	0.470442	0.588652
bin2	0.575758	0.25	0.676471	0.44086	0.46966	0.783333	0.562963	0.333333	0.333333	0.5	0.541667	0.4	0.431373	0.53125	0.52381	0.424242	0.447619	0.689394	0.464912	0.504762	0.5	0.544715	0.558559	0.603604	0.424242	0.570175	0.514493	0.601852	0.42735	0.591398	0.585859	0.589744		0.512398	0.242024	FALSE	FALSE	100		bin2	0.411765	0.477006	0.442029	0.534722	0.356322	0.394444	0.561905	0.495098	0.595745
bin3	0.575758	0.25	0.676471	0.473118	0.476463	0.75	0.518519	0.3	0.354839	0.5	0.533333	0.355556	0.441176	0.53125	0.515873	0.424242	0.438095	0.712121	0.438596	0.428571	0.446909	0.601626	0.540541	0.594595	0.409091	0.499526	0.485507	0.628571	0.393162	0.645161	0.625387	0.589744		0.504806	0.269137	FALSE	FALSE	150		bin3	0.393939	0.491329	0.42029	0.555556	0.37931	0.411111	0.447619	0.507463	0.595745
bin4	0.530303	0.25	0.680036	0.494624	0.473333	0.75	0.488889	0.266667	0.365591	0.5	0.533333	0.333333	0.431373	0.53125	0.484127	0.415924	0.490476	0.727273	0.438596	0.384594	0.4375	0.617886	0.540541	0.603604	0.414863	0.464201	0.463768	0.657143	0.393162	0.637276	0.708333	0.598291		0.503322	0.36527	FALSE	FALSE	200		bin4	0.393939	0.479734	0.413043	0.548611	0.413793	0.427778	0.409524	0.507463	0.553191
bin5	0.545455	0.3125	0.696078	0.526882	0.533333	0.75	0.496296	0.466667	0.562164	0.544444	0.525	0.344444	0.421569	0.510417	0.547619	0.54902	0.564765	0.840909	0.421053	0.614846	0.614583	0.691057	0.558559	0.621622	0.399711	0.482456	0.478261	0.67619	0.426451	0.588889	0.729167	0.614035		0.551701	0.66747	FALSE	FALSE	250		bin5	0.40404	0.551724	0.434783	0.597222	0.528736	0.45	0.428571	0.517413	0.631206
bin6	0.621212	0.479167	0.735294	0.655914	0.706667	0.766667	0.57037	0.4	0.819556	0.666667	0.708333	0.344444	0.428571	0.552083	0.682927	0.833333	0.837121	0.931818	0.447368	0.866667	0.724116	0.902439	0.576577	0.666667	0.424242	0.526316	0.637681	0.72381	0.552632	0.622222	0.805871	0.642959		0.651866	0.695442	FALSE	FALSE	300		bin6	0.5	0.727869	0.471014	0.631944	0.712644	0.638889	0.542857	0.517413	0.782609
bin7	0.765152	0.8125	0.764706	0.849462	0.77381	0.85	0.696296	0.4	0.846907	0.844444	0.825	0.333333	0.465826	0.59375	0.966667	0.928922	0.897727	0.931818	0.5	0.960396	0.888889	1	0.657658	0.72973	0.545455	0.552632	0.833333	0.847619	0.675439	0.611111	0.855429	0.747748		0.748492	0.523598	FALSE	FALSE	350		bin7	0.745098	0.907239	0.485346	0.770833	0.847701	0.755556	0.666667	0.512438	0.818841
bin8	0.816949	0.895833	0.764706	0.88172	0.8	0.864912	0.740741	0.4	0.848485	0.866667	0.883333	0.3	0.54902	0.645833	0.991453	0.979482	0.937816	0.916667	0.486486	0.968414	0.959596	1	0.711712	0.72973	0.631752	0.54386	0.898551	0.914286	0.684211	0.622222	0.864583	0.900901		0.781247	0.515758	FALSE	FALSE	400		bin8	0.919192	0.96016	0.496296	0.909722	0.916667	0.765348	0.761905	0.507463	0.811594
bin9	0.815363	0.977778	0.754902	0.903226	0.822807	0.841813	0.843603	0.4	0.929293	0.965049	0.916667	0.3	0.617647	0.65625	1	1	0.969066	0.886364	0.495495	0.96875	0.969697	1	0.72973	0.72973	0.681159	0.552632	0.934783	0.971429	0.692982	0.567771	0.895121	0.945946		0.80422	0.781526	FALSE	FALSE	450		bin9	0.938131	0.964386	0.488552	0.944444	0.92769	0.786706	0.809524	0.512438	0.833333
bin10	0.848148	0.97619	0.742598	0.903678	0.807788	0.847475	0.880897	0.398148	0.944328	1	0.946429	0.330225	0.740438	0.589286	1	1	0.975914	0.859523	0.523858	0.956306	0.974432	1	0.722748	0.743243	0.654428	0.555575	0.923982	1	0.696698	0.562329	0.909635	0.922222		0.810516	0.715408	FALSE	FALSE	500		bin10	0.956756	0.969253	0.463055	0.959921	0.932197	0.804946	0.774172	0.527463	0.841924
bin11	0.840191	0.888889	0.705156	0.911754	0.816327	0.85	0.890838	0.409524	0.934905	1	0.936364	0.264734	0.756718	0.589286	1	1	0.966465	0.85878	0.559989	0.979798	0.965674	1	0.699043	0.721781	0.657005	0.554696	0.828045	1	0.686025	0.555556	0.883761	0.980574		0.802871	0.687758	FALSE	FALSE	550		bin11	0.979798	0.965894	0.433999	0.955962	0.931034	0.816667	0.784762	0.52215	0.861505
bin12	0.837209	0.844444	0.673203	0.956989	0.823129	0.85	0.911111	0.4	0.939394	1	0.95	0.244444	0.764706	0.5625	1	0.980392	0.969697	0.848485	0.578947	0.960487	0.956989	0.991667	0.675676	0.72973	0.681159	0.570175	0.630435	1	0.684211	0.555556	0.876245	0.963964		0.794092	0.857014	FALSE	FALSE	600		bin12	0.969697	0.950364	0.42029	0.958333	0.942529	0.744444	0.8	0.495098	0.826087
bin13	0.782946	0.711111	0.642992	0.956989	0.816327	0.85	0.903704	0.4	0.939394	1	0.966667	0.266667	0.75014	0.583333	0.99187	0.911765	0.959596	0.795455	0.508772	0.931373	0.891398	0.932051	0.675676	0.72973	0.608696	0.631579	0.557971	1	0.666667	0.555556	0.83908	0.929825		0.771479	0.849574	FALSE	FALSE	650		bin13	0.969697	0.885246	0.369565	0.951389	0.954023	0.677778	0.8	0.467662	0.759259
bin14	0.736434	0.622222	0.631384	0.88172	0.816327	0.8	0.888889	0.4	0.909091	0.988889	0.991667	0.3	0.714286	0.59375	0.975407	0.872549	0.940582	0.75	0.5	0.911765	0.755556	0.897436	0.666667	0.72973	0.637681	0.631579	0.543478	0.980952	0.649123	0.577778	0.833333	0.885965		0.750445	0.822359	FALSE	FALSE	700		bin14	0.969697	0.832452	0.355556	0.92302	0.91954	0.555556	0.8	0.46532	0.699327
bin15	0.68254	0.555556	0.626263	0.752688	0.821128	0.716667	0.851852	0.4	0.888889	0.911111	1	0.344444	0.733333	0.59375	0.975203	0.852941	0.939988	0.719697	0.491228	0.871815	0.711111	0.816667	0.666667	0.72973	0.666667	0.614035	0.557971	0.990196	0.614035	0.533333	0.835125	0.84413		0.728399	0.692754	FALSE	FALSE	750		bin15	0.939394	0.795699	0.355556	0.928461	0.896552	0.394444	0.761905	0.460345	0.659259
bin16	0.595238	0.533333	0.636364	0.537634	0.810458	0.633333	0.807407	0.4	0.686869	0.77276	0.916667	0.344444	0.711485	0.572917	0.917683	0.764706	0.882353	0.628788	0.473684	0.735485	0.606513	0.545732	0.630631	0.711712	0.608696	0.561404	0.528986	0.715686	0.5	0.473118	0.603065	0.725699		0.642902	0.60356	FALSE	FALSE	800		bin16	0.79798	0.575269	0.335976	0.811594	0.850575	0.227778	0.72381	0.45098	0.575758
bin17	0.47619	0.333333	0.642137	0.387097	0.68366	0.533333	0.762963	0.4	0.565657	0.591398	0.808333	0.333333	0.676471	0.541667	0.839957	0.676471	0.727273	0.531008	0.45614	0.425926	0.539464	0.401829	0.648649	0.675676	0.42029	0.5	0.514493	0.470588	0.359649	0.451613	0.516487	0.54386		0.544842	0.775538	FALSE	FALSE	850		bin17	0.692866	0.453816	0.338619	0.683472	0.632184	0.166667	0.67619	0.465686	0.44697
bin18	0.354374	0.333333	0.612058	0.365591	0.542484	0.5	0.725926	0.3	0.525253	0.494624	0.625	0.322222	0.578431	0.510417	0.637032	0.617647	0.696078	0.44697	0.45614	0.342593	0.516487	0.365854	0.621622	0.693694	0.391304	0.464912	0.536232	0.441176	0.333333	0.483871	0.494624	0.464912		0.493569	0.386266	FALSE	FALSE	900		bin18	0.536301	0.322404	0.330808	0.591608	0.563218	0.133333	0.609524	0.465686	0.345842
bin19	0.290554	0.244444	0.59596	0.301075	0.51634	0.508772	0.711111	0.3	0.505051	0.424014	0.475	0.344444	0.460784	0.510417	0.417679	0.519608	0.686275	0.393939	0.447368	0.272773	0.478831	0.365854	0.594595	0.675676	0.347826	0.438596	0.521739	0.392157	0.350427	0.526882	0.473118	0.464912		0.454882	0.439428	FALSE	FALSE	950		bin19	0.454545	0.245902	0.34552	0.611111	0.406404	0.158319	0.628571	0.416667	0.315061
bin20	0.238971	0.266667	0.597589	0.319244	0.464243	0.542699	0.678771	0.274074	0.516162	0.356375	0.441667	0.314559	0.363544	0.52621	0.327169	0.51518	0.647059	0.382269	0.455108	0.248184	0.462557	0.349166	0.587087	0.672673	0.343215	0.423559	0.511279	0.398039	0.374044	0.542677	0.409195	0.400413		0.435926	0.35299	FALSE	FALSE	1000		bin20	0.325	0.235047	0.337635	0.59537	0.372256	0.203504	0.621068	0.375	0.270543
bin21	0.259882	0.26105	0.63903	0.347222	0.395879	0.479167	0.628838	0.233333	0.516487	0.347967	0.397837	0.285674	0.400135	0.543842	0.360323	0.50317	0.546871	0.386731	0.470547	0.256203	0.457708	0.354295	0.592172	0.708213	0.372193	0.43079	0.478829	0.39127	0.39961	0.531281	0.397379	0.378611		0.429767	0.304693	FALSE	FALSE	1050		bin21	0.341834	0.221273	0.315607	0.555453	0.343254	0.171001	0.535152	0.380496	0.270332
bin22	0.255814	0.1875	0.609923	0.354839	0.411765	0.508772	0.622222	0.2	0.535354	0.354839	0.4	0.3	0.419048	0.510417	0.336482	0.480392	0.509804	0.363636	0.482456	0.267899	0.479167	0.300813	0.594595	0.675926	0.333333	0.45614	0.463768	0.352381	0.435897	0.580645	0.483871	0.336257		0.425124	0.250108	FALSE	FALSE	1100		bin22	0.30303	0.219672	0.33591	0.555556	0.367816	0.212685	0.533333	0.348039	0.231884
bin23	0.263566	0.145833	0.59596	0.419355	0.424837	0.55	0.6	0.2	0.515152	0.344086	0.4	0.277778	0.447619	0.541667	0.368421	0.5	0.480392	0.30303	0.47321	0.307018	0.46875	0.300813	0.594595	0.666667	0.304348	0.438596	0.405797	0.342857	0.435897	0.55914	0.488889	0.34188		0.422067	0.218317	FALSE	FALSE	1150		bin23	0.30303	0.245902	0.362319	0.548611	0.428571	0.234557	0.514286	0.338235	0.217391
bin24	0.27907	0.125	0.575758	0.408602	0.443791	0.55	0.6	0.2	0.535354	0.322581	0.366667	0.255556	0.466667	0.520833	0.39975	0.539216	0.434343	0.295455	0.464201	0.330251	0.447917	0.276423	0.587087	0.675926	0.26087	0.403509	0.391304	0.333333	0.461538	0.548387	0.413328	0.282051		0.412336	0.505919	FALSE	FALSE	1200		bin24	0.30303	0.248634	0.384058	0.534722	0.428571	0.255556	0.514286	0.338235	0.217391
bin25	0.343376	0.145833	0.609923	0.430108	0.379085	0.566667	0.622222	0.2	0.464646	0.301075	0.4	0.3	0.466667	0.520833	0.404762	0.588235	0.401961	0.287879	0.424846	0.342105	0.427083	0.235772	0.583333	0.657407	0.188406	0.429825	0.376812	0.342857	0.461538	0.473118	0.372332	0.282051		0.407211	0.431788	FALSE	FALSE	1250		bin25	0.254902	0.241935	0.384058	0.513889	0.416667	0.262524	0.514286	0.348039	0.195652
bin26	0.44697	0.104167	0.568627	0.408602	0.379085	0.6	0.644444	0.2	0.363636	0.268817	0.416667	0.6	0.352381	0.395833	0.428571	0.389093	0.362745	0.242424	0.401849	0.385965	0.32702	0.186992	0.62037	0.642142	0.15942	0.377193	0.26087	0.266667	0.435897	0.462366	0.291461	0.290598		0.383777	0.397209	FALSE	FALSE	1300		bin26	0.245098	0.229279	0.398551	0.423611	0.52381	0.225989	0.495238	0.328431	0.179926
bin27	0.530303	0.0208333	0.519608	0.365591	0.405229	0.683333	0.637037	0.2	0.363636	0.253047	0.425	0.888889	0.257143	0.361559	0.460317	0.379032	0.363636	0.181818	0.357278	0.423423	0.323232	0.113821	0.62963	0.621622	0.289855	0.377193	0.23913	0.12465	0.418803	0.419355	0.172414	0.388214		0.381082	0.0874843	FALSE	FALSE	1350		bin27	0.22549	0.161111	0.281481	0.256944	0.557882	0.147769	0.447619	0.294118	0.219858
bin28	0.537879	0.0833333	0.411765	0.322581	0.444444	0.733333	0.6	0.233333	0.454545	0.277778	0.458333	0.931034	0.245234	0.322581	0.499806	0.413262	0.414141	0.227273	0.342105	0.416667	0.333333	0.121951	0.617868	0.63964	0.391304	0.377193	0.249919	0.077591	0.410256	0.494624	0.218391	0.578947		0.402514	0.00905698	TRUE	FALSE	1400		bin28	0.303922	0.0963602	0.195286	0.194444	0.529146	0.149425	0.428571	0.282234	0.340426
bin29	0.537879	0.166667	0.401961	0.344086	0.509804	0.7	0.555556	0.4	0.686869	0.3	0.491667	0.931034	0.257279	0.397849	0.5	0.444444	0.484848	0.393939	0.350877	0.448677	0.333333	0.178862	0.594595	0.621622	0.391304	0.394737	0.251852	0.0857143	0.384615	0.548387	0.356322	0.582771		0.438361	0.000339944	TRUE	TURE	1450		bin29	0.38408	0.130221	0.136364	0.173611	0.499589	0.105681	0.333333	0.280575	0.58156
bin30	0.503524	0.3125	0.408144	0.322581	0.607843	0.666667	0.451852	0.466667	0.717172	0.505376	0.551507	0.931034	0.294118	0.55914	0.531746	0.47575	0.53125	0.568182	0.368421	0.542279	0.363636	0.358333	0.585586	0.590591	0.536232	0.447368	0.407407	0.104762	0.396761	0.580645	0.471264	0.666667		0.494531	9.72939e-06	TRUE	TURE	1500		bin30	0.53125	0.129543	0.0844156	0.173611	0.563218	0.0684149	0.317367	0.276923	0.666667
bin31	0.439992	0.4375	0.500672	0.374194	0.627451	0.736842	0.459259	0.444444	0.777778	0.638351	0.518519	0.942118	0.406417	0.72043	0.593496	0.571429	0.59375	0.674419	0.429825	0.697917	0.484848	0.566667	0.567568	0.632353	0.585137	0.54386	0.548148	0.152381	0.447368	0.634409	0.643678	0.692308		0.56511	5.36678e-07	TRUE	TURE	1550		bin31	0.604167	0.166988	0.09628	0.205674	0.528736	0.169935	0.343137	0.293014	0.695035
bin32	0.443477	0.791667	0.625806	0.494253	0.580345	0.77193	0.442741	0.444444	0.737374	0.793103	0.542063	0.964286	0.585859	0.769176	0.66896	0.702381	0.614583	0.773533	0.473684	0.634807	0.649937	0.757535	0.594595	0.737374	0.742997	0.614035	0.725926	0.342857	0.657895	0.709677	0.739464	0.65812		0.649528	2.70838e-08	TRUE	TURE	1600		bin32	0.583333	0.297243	0.127552	0.289855	0.436782	0.192267	0.396316	0.280116	0.638298
bin33	0.452381	0.826389	0.6694	0.609195	0.528996	0.727096	0.452358	0.37037	0.777778	0.764368	0.590476	0.961941	0.739583	0.766667	0.661123	0.714568	0.707071	0.853997	0.508772	0.652007	0.729167	0.902798	0.587087	0.723954	0.72549	0.649123	0.854377	0.514286	0.765766	0.752688	0.795402	0.612665		0.685854	2.7494e-08	TRUE	TURE	1650		bin33	0.59375	0.402546	0.144258	0.375201	0.413793	0.227208	0.406515	0.288277	0.567376
bin34	0.452381	0.852991	0.722408	0.77179	0.542857	0.81145	0.416667	0.305556	0.848485	0.756173	0.59543	0.955204	0.84039	0.855556	0.647929	0.783889	0.758396	0.892089	0.535088	0.60173	0.744624	0.910767	0.611111	0.75255	0.704575	0.631579	0.849937	0.647619	0.738739	0.774194	0.781609	0.582353		0.708629	2.32842e-08	TRUE	TURE	1700		bin34	0.614583	0.558292	0.177521	0.457335	0.425326	0.289703	0.455556	0.291284	0.474235
bin35	0.495935	0.803704	0.825397	0.753043	0.559513	0.84127	0.42667	0.25	0.838598	0.746914	0.511111	0.954545	0.83871	0.792593	0.677554	0.914251	0.775404	0.882285	0.590156	0.626374	0.755376	0.920635	0.611111	0.686869	0.666667	0.631579	0.83602	0.747619	0.706049	0.784946	0.811576	0.483594		0.710815	2.12999e-07	TRUE	TURE	1750		bin35	0.635417	0.645859	0.256148	0.534024	0.391022	0.438492	0.482363	0.280569	0.384199
bin36	0.508333	0.842593	0.914912	0.753247	0.606121	0.878788	0.588393	0.291667	0.872253	0.746439	0.581705	0.937207	0.842912	0.74359	0.706452	0.904618	0.798077	0.862343	0.628571	0.597306	0.738691	0.917596	0.607843	0.601852	0.612536	0.598151	0.837807	0.813725	0.628571	0.806452	0.755291	0.478291		0.718823	3.02111e-08	TRUE	TURE	1800		bin36	0.65289	0.654971	0.239621	0.614286	0.233553	0.464912	0.435897	0.231685	0.350348
bin37	0.539136	0.875	0.946182	0.750516	0.670102	1	0.51192	0.420635	0.780968	0.722222	0.733333	1	0.829043	0.726203	0.735009	0.942593	0.732804	0.907843	0.717262	0.547619	0.71157	0.899833	0.593548	0.461039	0.725	0.594595	0.958695	0.901961	0.613785	0.764815	0.679658	0.493579		0.733952	1.37636e-09	TRUE	TURE	1850		bin37	0.573925	0.773016	0.269092	0.571517	0.162393	0.494709	0.378363	0.34219	0.247005
bin38	0.535088	0.902778	0.931746	0.762759	0.71413	1	0.418333	0.333333	0.65812	0.771739	0.841019	1	0.840443	0.730116	0.726914	0.913248	0.778571	0.763507	0.824181	0.571429	0.681823	0.91047	0.614406	0.451178	0.555556	0.594595	0.983333	0.95098	0.565668	0.820513	0.645774	0.563467		0.729851	3.65848e-10	TRUE	TURE	1900		bin38	0.511905	0.656566	0.286691	0.588889	0.315657	0.37619	0.281944	0.420343	0.119237
bin39	0.532304	0.777778	0.892774	0.817172	0.593074	1	0.37823	0.333333	0.638889	0.691919	0.784002	1	0.757895	0.553419	0.685771	0.814815	0.826007	0.656566	0.857436	0.571429	0.6	0.893519	0.626535	0.333333	0.75	0.585586	1	0.938685	0.550826	0.849684	0.588636	0.600733		0.702511	4.83734e-09	TRUE	TURE	1950		bin39	0.525641	0.704714	0.231481	0.383333	0.533333	0	0.261905	0.324176	0.0847475
bin40	0.587753	0.666667	0.918803	0.866667	0.551852	1	0.380805	0.4	0.533333	0.766667	0.716667	1	0.614781	0.638889	0.578788	0.768519	0.78022	0.678788	0.842391	0.3	0.595861	0.869048	0.637719	0.268519	NaN	0.556356	1	0.888787	0.576652	0.879832	0.483333	0.583333		0.675194	1.34169e-08	TRUE	TURE	2000		bin40	0.333333	0.768519	0.434524	0.333333	0.555556	NaN	0.361111	0.285185	0.0921257
bin41	0.590609	0.666667	1	1	0.353571	1	0.369444	0.5	0.6	0.731481	0.512821	1	0.371212	0.667677	0.603704	0.805556	0.742424	0.757937	0.846574	0.833333	0.579657	0.642857	0.625926	0.206349	NaN	0.682913	0.826058	0.862381	0.416667	0.885073	0.539216	0.453704		0.666897	7.63361e-06	TRUE	TURE	2050		bin41	0.24	0.571429	0.5	0.833333	1	NaN	0.305556	0.340741	0.142857
bin42	0.605496	0.5	1	1	0.555556	1	0.452381	0.611111	0.6	0.773077	0.494709	1	0.341667	0.691667	0.529412	0.783333	0.775926	0.52381	0.826045	1	0.487179	0.588889	0.688889	0.15	NaN	0.710172	0.666667	0.801753	0.363095	0.910723	0.393086	0.541667		0.656978	2.68745e-05	TRUE	TURE	2100		bin42	0.319225	0.533333	0.25	1	1	NaN	0.333333	0.433333	0.30202
bin43	0.510481	0.5	1	1	0.5	NaN	0.388889	0.5	0.533333	0.759259	0	1	0.323413	0.660317	0.522222	1	0.708333	0.433333	0.783333	NaN	0.484848	1	0.754329	0.833333	NaN	0.771128	1	0.858586	0.375458	1	0.431624	0.625		0.664042	6.86753e-05	TRUE	TURE	2150		bin43	0.389692	0.777778	0.277778	1	NaN	NaN	0.344444	0.361111	0.425
bin44	0.603535	0.5	1	1	0.5	NaN	0.777778	0.25	0.388889	0.672222	0	1	0.166667	0.25	0.5	1	0.62381	0.533333	0.716667	NaN	0.560185	1	0.766667	0.666667	NaN	0.816611	1	0.883333	0.367094	1	0.4	0.626984		0.64036	0.00011484	TRUE	TURE	2200		bin44	0.430037	1	0	0	NaN	NaN	0.333333	0.333333	0.522222
bin45	0.616667	0.5	1	NaN	1	NaN	1	NaN	0.611111	0.666667	0	NaN	0.466667	0.472222	0.555556	1	0.611111	0.416667	0.827381	NaN	0.571429	1	0.583333	0.666667	NaN	0.727652	1	1	0.369048	1	0.589947	0.377778		0.678073	2.58564e-07	TRUE	TURE	2250		bin45	0.574074	0.333333	0	0	NaN	NaN	0.6	0.333333	0.666667
bin46	0.5	0.75	1	NaN	1	NaN	1	NaN	1	0.333333	0.166667	NaN	0.6	0.666667	0.52381	1	0.5	0.5	0.666667	NaN	0.612698	NaN	1	0.555556	NaN	0.643037	NaN	1	0.6	1	0.84127	0.777778		0.718228	1.13728e-07	TRUE	TURE	2300		bin46	0.75	0	NaN	NaN	NaN	NaN	0.8	0.111111	0
bin47	0.833333	NaN	1	NaN	NaN	NaN	1	NaN	NaN	0	0.5	NaN	0.716667	0.666667	0.285714	NaN	0.666667	0.5	0.811111	NaN	0.333333	NaN	NaN	1	NaN	0.612374	NaN	1	0.666667	1	1	1		0.715396	9.95033e-06	TRUE	TURE	2350		bin47	0.583333	NaN	NaN	NaN	NaN	NaN	0.783333	0	0
bin48	1	NaN	1	NaN	NaN	NaN	NaN	NaN	NaN	0	0.25	NaN	0.777778	0.833333	0.166667	NaN	NaN	0.5	0.683333	NaN	0.333333	NaN	NaN	1	NaN	0.714286	NaN	1	0.888889	NaN	1	1		0.696726	0.0299873	TRUE	FALSE	2400		bin48	0	NaN	NaN	NaN	NaN	NaN	1	NaN	0
bin49	NaN	NaN	1	NaN	NaN	NaN	NaN	NaN	NaN	NaN	NaN	NaN	1	1	0.25	NaN	NaN	1	0.833333	NaN	0	NaN	NaN	NaN	NaN	0.588889	NaN	NaN	1	NaN	1	1		0.788384	0.0829841	FALSE	FALSE	2450		bin49	NaN	NaN	NaN	NaN	NaN	NaN	NaN	NaN	0
bin50	NaN	NaN	1	NaN	NaN	NaN	NaN	NaN	NaN	NaN	NaN	NaN	1	1	NaN	NaN	NaN	NaN	1	NaN	0	NaN	NaN	NaN	NaN	0.722222	NaN	NaN	NaN	NaN	NaN	NaN		0.787037	0.183503	FALSE	FALSE	2500		bin50	NaN	NaN	NaN	NaN	NaN	NaN	NaN	NaN	NaN
AVE																																								AVE
																																						time (ms)
																																					TURE	50
																																					TURE	100
																																					TURE	150
																																					TURE	200
																																					TURE	250
																																					TURE	300
																																					TURE	350
																																					TURE	400
																																					TURE	450
																																					TURE	500
																																					TURE	550
																																					TURE	600
																																					TURE	650
																																					TURE	700
																																					TURE	750
																																					TURE	800
																																					TURE	850
																																					TURE	900
																																					TURE	950
																																					TURE	1000
																																					TURE	1050
																																					TURE	1100
																																					TURE	1150
																																					TURE	1200
																																					TURE	1250
																																					TURE	1300
																																					TURE	1350
																																					TURE	1400
																																					TURE	1450
																																					TURE	1500
																																					TURE	1550
																																					TURE	1600
																																					TURE	1650
																																					TURE	1700
																																					TURE	1750
																																					TURE	1800
																																					TURE	1850
																																					TURE	1900
																																					TURE	1950
																																					TURE	2000
																																					TURE	2050
																																					TURE	2100
																																					TURE	2150
																																					TURE	2200
																																					TURE	2250
																																					TURE	2300
																																					TURE	2350
																																					TURE	2400
																																					TURE	2450
																																					TURE	2500
[truncated: 24 more columns]

## Sheet: FOOD_Self-paced
SP																																								SP
CUED	S401	S404	S406	S407	S409	S412	S414	S415	S417	S418	S419	S421	S422	S423	S424	S425	S426	S427	S429	S430	S431	S432	S433	S437	S438	S439	S440	S441	S442	S444	S447	S448		AVE	T-test		bonferroni	time (ms)		UNCUED	S401	S404	S406	S407	S409	S412	S414	S415	S417
																																					p<0.05/50
bin1	0.51875	0.47798	0.525862	0.514019	0.425453	0.487276	0.508823	0.48433	0.504022	0.519629	0.555556	0.543011	0.464681	0.494709	0.554667	0.561404	0.485232	0.525333	0.488889	0.601852	0.436364	0.639535	0.500025	0.480261	0.501475	0.433048	0.506734	0.50705	0.395475	0.501376	0.503145	0.528736		0.505459	0.466552	FALSE	FALSE	50		bin1	0.523438	0.52927	0.576271	0.561287	0.508333	0.506887	0.51012	0.482094	0.490741
bin2	0.542056	0.482456	0.508621	0.520249	0.415324	0.477401	0.535295	0.482759	0.505333	0.516409	0.561766	0.524414	0.460055	0.479892	0.530667	0.564327	0.476793	0.522667	0.491667	0.592593	0.433333	0.631783	0.504348	0.490826	0.510324	0.444444	0.508418	0.50705	0.405229	0.509313	0.538462	0.522989		0.506164	0.750974	FALSE	FALSE	100		bin2	0.497396	0.521377	0.566206	0.593496	0.512676	0.501377	0.501425	0.471074	0.5
bin3	0.52648	0.47798	0.501475	0.546527	0.418005	0.453782	0.513171	0.484257	0.50813	0.544643	0.581073	0.517748	0.443205	0.485333	0.51871	0.535088	0.491667	0.5	0.484594	0.570505	0.429858	0.631783	0.505848	0.487823	0.516224	0.430199	0.498316	0.5	0.403928	0.527014	0.525488	0.511494		0.502198	0.620633	FALSE	FALSE	150		bin3	0.492188	0.518817	0.55528	0.588076	0.538683	0.511042	0.509972	0.45	0.483067
bin4	0.523364	0.471976	0.513043	0.582795	0.449772	0.456583	0.521944	0.481481	0.512466	0.556548	0.590643	0.517615	0.45	0.485116	0.530667	0.54386	0.483333	0.486559	0.521222	0.553433	0.433333	0.638555	0.508772	0.493798	0.528024	0.438746	0.498316	0.50831	0.419872	0.536703	0.520788	0.522989		0.50877	0.914103	FALSE	FALSE	200		bin4	0.502604	0.516129	0.515152	0.55467	0.541556	0.513889	0.524217	0.449743	0.498471
bin5	0.501558	0.482456	0.684058	0.669725	0.487179	0.507003	0.520571	0.475783	0.550292	0.551622	0.599415	0.594181	0.516667	0.467974	0.522839	0.564327	0.479167	0.47043	0.805085	0.591087	0.442424	0.724806	0.60928	0.504644	0.539823	0.552707	0.540236	0.588889	0.512821	0.532963	0.593651	0.522989		0.553333	0.465632	FALSE	FALSE	250		bin5	0.492188	0.543011	0.680441	0.658284	0.563716	0.593371	0.553316	0.499953	0.527922
bin6	0.525157	0.473684	0.873907	0.830303	0.509741	0.633053	0.612279	0.509972	0.594616	0.628319	0.584795	0.756839	0.676891	0.508197	0.641449	0.710914	0.667747	0.459677	0.867232	0.575061	0.589964	0.790698	0.637681	0.550855	0.569322	0.646724	0.582054	0.771078	0.628205	0.573232	0.812698	0.531609		0.635124	0.538914	FALSE	FALSE	300		bin6	0.46875	0.564172	0.867769	0.83347	0.580018	0.713235	0.631827	0.533333	0.590725
bin7	0.525157	0.479532	0.918129	0.912121	0.648178	0.815126	0.691613	0.524217	0.725737	0.716814	0.619883	0.879247	0.738889	0.562374	0.826667	0.879056	0.786008	0.538817	0.896359	0.569545	0.872727	0.865321	0.684058	0.611111	0.628319	0.740741	0.64	0.921474	0.712176	0.634946	0.955556	0.54023		0.720629	0.0956129	FALSE	FALSE	350		bin7	0.497396	0.565333	0.955923	0.908136	0.673633	0.879338	0.711485	0.588361	0.746871
bin8	0.523511	0.523392	0.973684	0.987879	0.813319	0.896359	0.717167	0.549858	0.842904	0.755162	0.640351	0.948684	0.777778	0.567154	0.962667	0.985251	0.958848	0.602667	0.867706	0.552381	0.978593	0.904215	0.744928	0.697248	0.693215	0.769231	0.676667	0.97479	0.797386	0.676543	0.996795	0.543103		0.778107	0.415077	FALSE	FALSE	400		bin8	0.50646	0.578222	0.967055	0.953125	0.776538	0.949153	0.7401	0.608815	0.843929
bin9	0.515432	0.564327	0.990832	0.99697	0.841041	0.920904	0.73604	0.558405	0.88886	0.82029	0.637168	0.956417	0.769444	0.562486	0.976	1	1	0.632	0.81166	0.522162	0.990826	0.942083	0.785507	0.737003	0.769493	0.789174	0.697657	0.991316	0.798571	0.679915	1	0.576866		0.795589	0.511583	FALSE	FALSE	450		bin9	0.492188	0.621333	0.982658	0.972848	0.848522	0.963277	0.744965	0.609877	0.881656
bin10	0.511707	0.566035	0.989	1	0.87644	0.910047	0.685599	0.532009	0.874754	0.806802	0.617713	0.947457	0.726096	0.569518	0.986217	1	1	0.626803	0.75	0.545971	0.990032	0.93455	0.770162	0.748617	0.789819	0.789235	0.669157	0.982231	0.748097	0.662217	1	0.58311		0.787169	0.207939	FALSE	FALSE	500		bin10	0.463422	0.646628	0.98242	0.972048	0.8713	0.946304	0.737142	0.636467	0.877554
bin11	0.453995	0.581544	0.977911	0.996255	0.908976	0.910756	0.731797	0.524076	0.850644	0.80909	0.607888	0.918567	0.768954	0.55927	0.996564	1	1	0.655747	0.741261	0.510017	0.980182	0.967038	0.790608	0.776579	0.78256	0.828963	0.688032	0.947356	0.680076	0.703531	1	0.580033		0.788383	0.231228	FALSE	FALSE	550		bin11	0.417374	0.668428	0.985665	0.970993	0.880514	0.942082	0.739096	0.640467	0.831499
bin12	0.476636	0.596491	0.956897	0.945455	0.912997	0.898305	0.677363	0.507123	0.763458	0.773913	0.565573	0.742332	0.697222	0.523416	1	0.987933	1	0.672	0.669468	0.530527	0.929126	0.942529	0.773913	0.757576	0.795796	0.82906	0.640264	0.893557	0.563574	0.716049	1	0.58908		0.760238	0.847948	FALSE	FALSE	600		bin12	0.384407	0.661333	0.97541	0.93992	0.886692	0.864943	0.723824	0.658402	0.764434
bin13	0.433022	0.593567	0.89905	0.863636	0.924837	0.884181	0.631268	0.495726	0.65836	0.696019	0.55848	0.539477	0.647222	0.478186	1	0.959588	1	0.653333	0.636549	0.521036	0.848189	0.896552	0.77193	0.718182	0.801802	0.834758	0.59736	0.840336	0.450172	0.706173	0.9808	0.58908		0.722152	0.473406	FALSE	FALSE	650		bin13	0.362205	0.645333	0.964481	0.87037	0.889517	0.833333	0.706433	0.643838	0.714246
bin14	0.404984	0.567251	0.824313	0.79697	0.935782	0.890756	0.593567	0.487179	0.615905	0.622053	0.535088	0.48457	0.622222	0.444743	0.992063	0.925436	1	0.629333	0.598291	0.504792	0.801258	0.891473	0.754386	0.704254	0.803571	0.828569	0.533036	0.815126	0.403351	0.691358	0.961414	0.600575		0.69574	0.397836	FALSE	FALSE	700		bin14	0.333333	0.632	0.945355	0.838798	0.906248	0.766567	0.669591	0.63388	0.67787
bin15	0.37963	0.563422	0.744253	0.775758	0.935786	0.87395	0.567741	0.504274	0.538984	0.578472	0.532164	0.481481	0.611111	0.452328	0.991978	0.905655	1	0.624	0.569801	0.491909	0.763313	0.882809	0.751462	0.702429	0.796386	0.807471	0.503333	0.794331	0.38114	0.69309	0.967638	0.612069		0.680568	0.484365	FALSE	FALSE	750		bin15	0.330688	0.64	0.887572	0.841264	0.901999	0.738393	0.628986	0.628415	0.640557
bin16	0.364486	0.551622	0.606322	0.732895	0.929529	0.844633	0.491379	0.521368	0.513661	0.459547	0.513171	0.412536	0.563025	0.44746	0.941941	0.880084	0.945833	0.594667	0.456897	0.478964	0.620861	0.834398	0.71345	0.647975	0.77381	0.754298	0.45	0.751412	0.339306	0.681592	0.889968	0.603448		0.634704	0.332996	FALSE	FALSE	800		bin16	0.346561	0.642667	0.714776	0.783829	0.897436	0.681034	0.577586	0.617486	0.638095
bin17	0.371524	0.539823	0.531635	0.680433	0.929043	0.765645	0.475661	0.51567	0.528633	0.355987	0.492754	0.389327	0.471751	0.417781	0.776083	0.819245	0.78481	0.56	0.436432	0.475728	0.40616	0.772949	0.649123	0.619217	0.723214	0.6627	0.38	0.663866	0.303882	0.674959	0.69281	0.609195		0.577376	0.431739	FALSE	FALSE	850		bin17	0.357914	0.634667	0.580762	0.710586	0.89605	0.606306	0.568159	0.603306	0.624693
bin18	0.4081	0.530973	0.498575	0.620058	0.908872	0.699375	0.460918	0.527066	0.525745	0.275874	0.46087	0.398305	0.394365	0.413675	0.571903	0.665366	0.535865	0.518645	0.448276	0.440565	0.331295	0.722102	0.614035	0.589506	0.636905	0.584795	0.36	0.570147	0.29078	0.651515	0.58555	0.62069		0.526897	0.185859	FALSE	FALSE	900		bin18	0.382218	0.626667	0.535613	0.692557	0.906839	0.505848	0.531887	0.550964	0.632944
bin19	0.42898	0.548673	0.487179	0.598039	0.910588	0.642704	0.449376	0.532764	0.51897	0.241131	0.46087	0.404931	0.366947	0.418033	0.492829	0.550767	0.421238	0.481183	0.468391	0.431288	0.324159	0.688447	0.581871	0.51872	0.562849	0.540936	0.385993	0.491453	0.228514	0.616344	0.511551	0.62069		0.4977	0.260492	FALSE	FALSE	950		bin19	0.39895	0.624	0.51147	0.650324	0.907496	0.432749	0.513516	0.487603	0.639725
bin20	0.470859	0.561723	0.48221	0.574567	0.908057	0.594157	0.445335	0.492598	0.502749	0.246794	0.429186	0.404519	0.366382	0.429776	0.426781	0.445934	0.38483	0.494778	0.465949	0.450174	0.338746	0.680504	0.563727	0.487359	0.523242	0.545547	0.434592	0.455351	0.189638	0.552223	0.528003	0.603489		0.483743	0.293365	FALSE	FALSE	1000		bin20	0.430725	0.620545	0.483522	0.628628	0.896597	0.414683	0.519766	0.508404	0.641533
bin21	0.450303	0.565133	0.4474	0.562272	0.910689	0.569445	0.428814	0.496952	0.488479	0.273882	0.443178	0.405399	0.383389	0.457886	0.377026	0.341725	0.345815	0.49452	0.447304	0.494725	0.310198	0.683577	0.536114	0.437831	0.522638	0.513679	0.451556	0.435221	0.221667	0.523837	0.493687	0.579993		0.471698	0.583411	FALSE	FALSE	1050		bin21	0.440172	0.632814	0.47117	0.588381	0.904793	0.375248	0.458067	0.496959	0.623335
bin22	0.463742	0.575397	0.447048	0.496797	0.913194	0.5535	0.437812	0.466687	0.470741	0.275867	0.466862	0.414164	0.376442	0.456036	0.345729	0.265017	0.311795	0.506777	0.498424	0.442533	0.341098	0.68275	0.542907	0.463022	0.46814	0.521589	0.443179	0.414617	0.163731	0.440769	0.503341	0.572455		0.460692	0.594149	FALSE	FALSE	1100		bin22	0.437393	0.619857	0.441937	0.539031	0.876437	0.34635	0.504346	0.527215	0.606941
bin23	0.492355	0.566372	0.444444	0.449838	0.901423	0.55848	0.425595	0.485632	0.4685	0.281451	0.416667	0.409214	0.361345	0.44713	0.341737	0.20528	0.305096	0.49458	0.504274	0.415094	0.342593	0.679708	0.533333	0.43953	0.43377	0.525862	0.493197	0.406248	0.152482	0.440204	0.541667	0.573913		0.454282	0.649153	FALSE	FALSE	1150		bin23	0.461942	0.608	0.445679	0.486799	0.860761	0.317123	0.504246	0.523035	0.598171
bin24	0.498471	0.551622	0.450142	0.41398	0.874587	0.546784	0.419133	0.468391	0.456966	0.28869	0.391929	0.441734	0.374662	0.460879	0.334282	0.16452	0.291139	0.498645	0.498575	0.411215	0.348765	0.666667	0.521739	0.424109	0.404762	0.520115	0.513605	0.396552	0.147891	0.438348	0.504762	0.567716		0.446606	0.551284	FALSE	FALSE	1200		bin24	0.498688	0.616	0.439572	0.44666	0.857181	0.321937	0.500076	0.528455	0.588276
bin25	0.493939	0.548673	0.450142	0.396825	0.831683	0.56469	0.459966	0.454023	0.456989	0.300595	0.372814	0.456125	0.372549	0.463611	0.317554	0.176081	0.295359	0.50411	0.495726	0.4081	0.358025	0.666667	0.501449	0.418709	0.396518	0.507246	0.520271	0.377947	0.122807	0.417284	0.466667	0.560345		0.441672	0.926478	FALSE	FALSE	1250		bin25	0.485646	0.598946	0.409214	0.420449	0.815869	0.31339	0.495726	0.533875	0.578117
bin26	0.50303	0.528024	0.42735	0.305258	0.678768	0.570175	0.458831	0.431034	0.445008	0.294605	0.292754	0.393775	0.377819	0.46901	0.266667	0.151313	0.265823	0.49449	0.518398	0.389937	0.398822	0.633075	0.426087	0.406802	0.294985	0.463768	0.441077	0.378838	0.102172	0.382716	0.336508	0.497126		0.407001	0.624061	FALSE	FALSE	1300		bin26	0.511811	0.571429	0.320783	0.284553	0.695931	0.310541	0.485706	0.516393	0.58978
bin27	0.515263	0.510324	0.358974	0.233645	0.386139	0.548336	0.475133	0.428161	0.423315	0.272727	0.274066	0.34916	0.394847	0.52828	0.247211	0.174603	0.221249	0.5	0.535663	0.407692	0.40723	0.51938	0.450598	0.319755	0.20059	0.411594	0.341132	0.324561	0.150877	0.345679	0.260518	0.41092		0.372738	0.350535	FALSE	FALSE	1350		bin27	0.517249	0.558201	0.241814	0.167556	0.421409	0.353107	0.446033	0.489071	0.520128
bin28	0.493996	0.486726	0.397101	0.205607	0.198139	0.519096	0.434729	0.446677	0.429965	0.29828	0.257971	0.351977	0.389831	0.549093	0.290728	0.180353	0.282051	0.532258	0.541311	0.414362	0.358512	0.402508	0.461988	0.292881	0.182891	0.327485	0.319865	0.320697	0.192982	0.349746	0.199346	0.451149		0.361259	0.207368	FALSE	FALSE	1400		bin28	0.514774	0.563492	0.23052	0.139432	0.302551	0.339876	0.435154	0.467213	0.477642
bin29	0.509259	0.482327	0.388406	0.193146	0.157524	0.489855	0.423563	0.508621	0.494253	0.328337	0.263158	0.347222	0.407939	0.535413	0.308091	0.191824	0.336146	0.494624	0.571446	0.404175	0.350336	0.365366	0.488304	0.261682	0.19469	0.31195	0.333333	0.336232	0.341657	0.350617	0.173203	0.468391		0.369097	0.0450845	TRUE	FALSE	1450		bin29	0.484127	0.541079	0.245822	0.154035	0.241822	0.293447	0.435529	0.46281	0.457944
bin30	0.535826	0.492625	0.452174	0.205459	0.133995	0.482456	0.416662	0.537356	0.483379	0.373807	0.353801	0.349136	0.46586	0.557716	0.428184	0.212485	0.425	0.465054	0.553298	0.435754	0.403594	0.357747	0.491228	0.281373	0.19764	0.307018	0.434343	0.359195	0.507734	0.362963	0.130719	0.461119		0.395459	0.00128089	TRUE	FALSE	1500		bin30	0.457964	0.486428	0.308123	0.150419	0.181021	0.293447	0.427757	0.46281	0.416201
bin31	0.609762	0.481623	0.602339	0.287462	0.17396	0.48988	0.41992	0.543103	0.50133	0.469027	0.479507	0.39277	0.552058	0.595588	0.566396	0.252336	0.514768	0.454581	0.510145	0.436157	0.548522	0.317948	0.488304	0.445424	0.223214	0.388406	0.624378	0.465517	0.691756	0.387046	0.107843	0.457971		0.45247	7.82589e-05	TRUE	TURE	1550		bin31	0.408679	0.47509	0.389356	0.203556	0.16927	0.310541	0.444172	0.465565	0.39195
bin32	0.694706	0.555679	0.693215	0.438639	0.20064	0.475362	0.453854	0.553623	0.559709	0.587021	0.572693	0.42626	0.612994	0.623422	0.665705	0.360073	0.618104	0.450387	0.481159	0.439443	0.635405	0.397666	0.51462	0.615334	0.329586	0.372108	0.741337	0.577586	0.78022	0.461728	0.230473	0.428986		0.517117	1.97078e-05	TRUE	TURE	1600		bin32	0.332377	0.428571	0.46069	0.317585	0.161455	0.304843	0.462419	0.468113	0.431133
bin33	0.721589	0.579288	0.768649	0.514019	0.275865	0.478386	0.451061	0.556522	0.587887	0.636637	0.610619	0.50158	0.646014	0.661254	0.725806	0.481481	0.694406	0.447699	0.473811	0.496902	0.653311	0.549673	0.511645	0.720635	0.480039	0.419756	0.706287	0.643678	0.83871	0.525926	0.440594	0.444444		0.57013	8.73199e-06	TRUE	TURE	1650		bin33	0.288242	0.391689	0.532196	0.475066	0.168173	0.331401	0.466667	0.439187	0.476893
bin34	0.726632	0.567657	0.775407	0.641745	0.382693	0.485482	0.46587	0.562319	0.604412	0.72973	0.685525	0.546992	0.677871	0.612383	0.731707	0.583939	0.746822	0.481333	0.47076	0.50651	0.620739	0.673778	0.481159	0.777778	0.666667	0.483955	0.708152	0.703554	0.841176	0.599023	0.56	0.488304		0.61219	1.82923e-05	TRUE	TURE	1700		bin34	0.318973	0.382562	0.601702	0.594821	0.276524	0.339224	0.452932	0.461523	0.497051
bin35	0.717341	0.621334	0.779488	0.74227	0.553535	0.523599	0.489458	0.56077	0.601111	0.764401	0.694579	0.625731	0.676891	0.575351	0.746624	0.654206	0.803219	0.520348	0.488304	0.476087	0.632131	0.738323	0.491279	0.820728	0.774288	0.508929	0.680317	0.696165	0.824946	0.634147	0.623762	0.507375		0.642095	6.6871e-05	TRUE	TURE	1750		bin35	0.30038	0.345408	0.653533	0.713611	0.330096	0.362832	0.441594	0.472678	0.510873
bin36	0.765708	0.627201	0.74107	0.78242	0.658778	0.519359	0.531158	0.566092	0.602158	0.777227	0.735736	0.668686	0.668534	0.560022	0.758999	0.716511	0.847046	0.498601	0.504348	0.516955	0.667786	0.763463	0.511696	0.846623	0.827791	0.547619	0.708069	0.69232	0.803283	0.618687	0.701056	0.501475		0.66364	9.12351e-05	TRUE	TURE	1800		bin36	0.283395	0.324302	0.664246	0.74869	0.388491	0.395833	0.428169	0.486248	0.532508
bin37	0.731459	0.641301	0.682489	0.79677	0.743456	0.522686	0.525313	0.537356	0.565741	0.762493	0.743105	0.672673	0.659085	0.562331	0.742297	0.745327	0.87808	0.520392	0.514518	0.594884	0.692268	0.770053	0.520545	0.848332	0.8125	0.591592	0.654993	0.698799	0.77406	0.623737	0.755084	0.520888		0.668894	0.000150604	TRUE	TURE	1850		bin37	0.436059	0.317122	0.645473	0.76374	0.472814	0.42599	0.438594	0.473829	0.540616
bin38	0.725353	0.677802	0.669763	0.827316	0.83032	0.567139	0.52277	0.499975	0.582134	0.779317	0.736818	0.681818	0.645314	0.563968	0.705292	0.750779	0.92092	0.526126	0.53827	0.527778	0.707973	0.820198	0.5059	0.871107	0.829392	0.589286	0.586851	0.688599	0.753086	0.643945	0.791851	0.546547		0.675428	0.000254786	TRUE	TURE	1900		bin38	0.580897	0.34492	0.657234	0.784934	0.513548	0.407738	0.465114	0.497222	0.557377
bin39	0.732168	0.688825	0.689322	0.822333	0.854965	0.59697	0.552158	0.512821	0.546949	0.7652	0.75	0.697898	0.628319	0.583409	0.665499	0.753894	0.934435	0.519239	0.542773	0.484127	0.691176	0.762322	0.5	0.849612	0.816556	0.605326	0.521125	0.67371	0.721027	0.637077	0.822917	0.540541		0.670709	0.000103508	TRUE	TURE	1950		bin39	0.520915	0.301005	0.656085	0.735717	0.501752	0.428116	0.485779	0.486111	0.529703
bin40	0.666667	0.708744	0.644055	0.791264	0.86497	0.626911	0.565336	0.51567	0.496971	0.716195	0.734172	0.727273	0.643998	0.620812	0.574189	0.755481	0.92674	0.530791	0.544379	0.481481	0.662306	0.755126	0.542424	0.820336	0.817943	0.612437	0.453892	0.693939	0.658352	0.631313	0.84269	0.484848		0.659741	4.20756e-05	TRUE	TURE	2000		bin40	0.5	0.324206	0.613826	0.651265	0.468475	0.421585	0.511276	0.456583	0.484949
bin41	0.666667	0.706481	0.562771	0.779037	0.843184	0.615676	0.559155	0.51567	0.55462	0.686178	0.70318	0.70938	0.677239	0.648085	0.536817	0.755556	0.854295	0.564165	0.520702	0.481481	0.679192	0.812475	0.551515	0.826462	0.810238	0.639264	0.533373	0.699956	0.511555	0.626263	0.867946	0.5		0.656205	1.91509e-06	TRUE	TURE	2050		bin41	0.525641	0.296901	0.493323	0.512504	0.497268	0.430368	0.508523	0.476284	0.481512
bin42	0.763889	0.681682	0.481007	0.76856	0.817312	0.632922	0.551338	0.509972	0.587802	0.684473	0.660747	0.702257	0.667559	0.646966	0.562563	0.742857	0.856125	0.571007	0.528529	0.547619	0.651735	0.746032	0.58104	0.822401	0.784947	0.646199	0.601349	0.733643	0.55245	0.627502	0.888478	0.495495		0.659264	7.17954e-08	TRUE	TURE	2100		bin42	0.434524	0.317087	0.457119	0.406674	0.569208	0.396186	0.545633	0.471891	0.457994
bin43	0.869048	0.645945	0.393179	0.741228	0.817686	0.636249	0.54549	0.523089	0.589932	0.617825	0.653463	0.714683	0.620779	0.687276	0.611495	0.719719	0.90303	0.545338	0.591576	0.566667	0.566967	0.630556	0.596844	0.822997	0.74365	0.587021	0.656566	0.744352	0.565773	0.606917	0.892406	0.474474		0.652569	3.8798e-08	TRUE	TURE	2150		bin43	0.5	0.344333	0.375646	0.326015	0.535714	0.397873	0.566565	0.492877	0.446228
bin44	0.777778	0.659363	0.326196	0.661927	0.687108	0.636339	0.544121	0.494021	0.633949	0.575546	0.634299	0.716153	0.65448	0.722042	0.582498	0.68932	0.896296	0.581561	0.649281	0.622222	0.544203	0.711111	0.614379	0.792665	0.701043	0.550866	0.775926	0.760928	0.526667	0.593137	0.87793	0.444793		0.644942	1.4628e-08	TRUE	TURE	2200		bin44	0.377778	0.291852	0.328798	0.259854	0.457265	0.418086	0.56543	0.514368	0.418519
bin45	0.611111	0.684444	0.330859	0.642512	0.609248	0.607018	0.544618	0.492438	0.685224	0.606956	0.585479	0.675522	0.627581	0.757894	0.542083	0.642529	0.933333	0.635927	0.680166	1	0.586567	0.657576	0.628357	0.827375	0.660963	0.512171	0.738095	0.765306	0.602778	0.616739	0.847118	0.455357		0.649792	2.45499e-08	TRUE	TURE	2250		bin45	0.522222	0.275088	0.29344	0.253419	0.266374	0.4	0.559325	0.494253	0.403644
bin46	0.5	0.70859	0.31886	0.662932	0.524046	0.549954	0.515097	0.518376	0.68909	0.608333	0.526909	0.656508	0.614054	0.752461	0.484142	0.608088	1	0.651207	0.684902	1	0.671937	0.688889	0.663379	0.870965	0.564289	0.473492	0.626984	0.800687	0.698257	0.606433	0.838117	0.491071		0.642751	5.37725e-07	TRUE	TURE	2300		bin46	1	0.134739	0.251927	0.23907	0.200334	0.382607	0.567345	0.472286	0.380777
bin47	0.833333	0.672515	0.272773	0.641619	0.493842	0.540662	0.520728	0.503086	0.698519	0.563339	0.461846	0.633554	0.620073	0.718898	0.473035	0.61283	1	0.688218	0.669913	0.777778	0.661404	0.666667	0.651018	0.893566	0.498171	0.503771	0.888889	0.826938	0.743791	0.564458	0.781054	0.505952		0.643195	6.57361e-08	TRUE	TURE	2350		bin47	1	0.185376	0.237434	0.190249	0.26462	0.367327	0.58091	0.448125	0.345388
bin48	1	0.656396	0.240332	0.615342	0.392593	0.536936	0.492546	0.526481	0.69721	0.613333	0.425739	0.649455	0.602774	0.715519	0.488198	0.552247	1	0.708422	0.675589	0.5	0.714425	0.740741	0.609814	0.850427	0.470692	0.511073	1	0.84164	0.777778	0.549138	0.691459	0.5		0.635822	5.92188e-08	TRUE	TURE	2400		bin48	1	0.154457	0.26022	0.17623	0.398291	0.361709	0.586899	0.397936	0.284247
bin49	NaN	0.683761	0.284274	0.612878	0.332316	0.528068	0.485119	0.561679	0.682796	0.685	0.471122	0.673071	0.597648	0.764334	0.535459	0.534788	1	0.700032	0.636364	0.5	0.637908	0.738095	0.581594	0.838889	0.481144	0.496036	1	0.858248	0.828283	0.522201	0.610016	0.464757		0.623415	3.13218e-08	TRUE	TURE	2450		bin49	1	0.221212	0.3	0.147274	0.39627	0.375069	0.57673	0.387022	0.255756
bin50	NaN	0.646465	0.302381	0.572721	0.358388	0.504112	0.490881	0.571868	0.670631	0.662846	0.514833	0.666357	0.564914	0.791086	0.601476	0.515274	NaN	0.707667	0.635627	0.5	0.65873	0.677778	0.568578	0.753704	0.413681	0.506329	NaN	0.868521	0.703704	0.504226	0.625424	0.450292		0.5865	2.28447e-08	TRUE	TURE	2500		bin50	1	0.322222	0.318293	0.236308	0.363636	0.367965	0.561997	0.384351	0.306034
AVE																																								AVE
SP DOT																																								SP DOT
CUED	S401	S404	S406	S407	S409	S412	S414	S415	S417	S418	S419	S421	S422	S423	S424	S425	S426	S427	S429	S430	S431	S432	S433	S437	S438	S439	S440	S441	S442	S444	S447	S448		AVE	T-test			time (ms)		UNCUED	S401	S404	S406	S407	S409	S412	S414	S415	S417
bin1	0.541041	0.47619	0.530612	0.457143	0.453704	0.472868	0.52679	0.487179	0.443751	0.549911	0.612613	0.449612	0.395349	0.422764	0.516667	0.425926	0.48	0.516667	0.547619	0.59596	0.367521	0.5625	0.564103	0.390244	0.581197	0.376344	0.4	0.480251	0.382353	0.436027	0.44086	0.605263		0.484032	0.114419	FALSE	FALSE	50		bin1	0.539683	0.578947	0.466667	0.656272	0.457692	0.576577	0.45614	0.483333	0.35
bin2	0.54955	0.492063	0.496599	0.485714	0.444444	0.449612	0.54386	0.487179	0.435897	0.558824	0.657658	0.42488	0.403101	0.414634	0.516667	0.444444	0.453333	0.516667	0.547619	0.575758	0.358974	0.541667	0.555556	0.391986	0.606838	0.397849	0.455556	0.480251	0.382353	0.447811	0.516129	0.596491		0.488436	0.269092	FALSE	FALSE	100		bin2	0.547619	0.544571	0.433333	0.666667	0.469636	0.603604	0.447368	0.483333	0.368902
bin3	0.513514	0.487998	0.448129	0.495238	0.485979	0.434109	0.561404	0.487179	0.459459	0.519608	0.684685	0.412698	0.385751	0.414634	0.483333	0.462963	0.48	0.47906	0.507937	0.552083	0.358974	0.53125	0.538462	0.425249	0.615385	0.376344	0.433333	0.452381	0.352941	0.460205	0.484207	0.578947		0.480107	0.141496	FALSE	FALSE	150		bin3	0.539683	0.567568	0.434767	0.659091	0.513514	0.585586	0.438596	0.45	0.341463
bin4	0.531532	0.495935	0.458333	0.514286	0.538375	0.426357	0.561404	0.512821	0.491241	0.54902	0.684685	0.412698	0.404762	0.442058	0.458333	0.490741	0.48	0.487179	0.515873	0.53125	0.358974	0.536962	0.521368	0.483933	0.606838	0.344086	0.422222	0.460317	0.361905	0.465278	0.468078	0.578947		0.487368	0.291155	FALSE	FALSE	200		bin4	0.507937	0.585586	0.408602	0.569063	0.509009	0.594595	0.45614	0.45	0.393699
bin5	0.576577	0.52381	0.597222	0.533333	0.52381	0.418605	0.561404	0.461538	0.518268	0.542857	0.702703	0.464378	0.412698	0.45614	0.458333	0.444444	0.493333	0.461538	0.650794	0.552083	0.367521	0.580645	0.581197	0.532327	0.615385	0.322581	0.4	0.515873	0.361905	0.451389	0.483871	0.578947		0.504547	0.190889	FALSE	FALSE	250		bin5	0.515873	0.63964	0.451613	0.565891	0.517544	0.630631	0.504274	0.508333	0.418089
bin6	0.574074	0.507937	0.758865	0.72381	0.514286	0.496124	0.578947	0.504274	0.517544	0.590476	0.630631	0.640827	0.460317	0.491228	0.5	0.574074	0.6	0.435897	0.722222	0.552083	0.478632	0.602151	0.589744	0.595238	0.641026	0.365591	0.382375	0.587302	0.371429	0.465278	0.658602	0.578947		0.55281	0.314694	FALSE	FALSE	300		bin6	0.452381	0.663822	0.677419	0.705426	0.517544	0.666667	0.574224	0.541667	0.406504
bin7	0.564815	0.5	0.822695	0.809524	0.6	0.697674	0.584163	0.538462	0.535799	0.6	0.657658	0.755445	0.5	0.495726	0.691667	0.777778	0.626667	0.423718	0.769841	0.54072	0.811966	0.652554	0.589744	0.634921	0.683761	0.430108	0.45977	0.81746	0.442577	0.444444	0.885417	0.578947		0.622626	0.161117	FALSE	FALSE	350		bin7	0.47619	0.631579	0.827957	0.806202	0.55358	0.782282	0.598291	0.557317	0.467699
bin8	0.583333	0.5	0.93617	0.961905	0.720996	0.821705	0.612613	0.555556	0.655287	0.619048	0.648649	0.874308	0.528068	0.512821	0.916667	0.962963	0.893333	0.45	0.753968	0.520833	0.965812	0.739583	0.623932	0.703212	0.74359	0.430108	0.528736	0.928571	0.529412	0.5	0.989247	0.578947		0.696543	0.588652	FALSE	FALSE	400		bin8	0.515873	0.622807	0.892473	0.909091	0.634187	0.87963	0.564103	0.544715	0.636823
bin9	0.558559	0.507937	0.978723	0.990476	0.747648	0.837209	0.605263	0.564103	0.752381	0.675926	0.63964	0.896825	0.520325	0.48312	0.925	1	1	0.483333	0.690476	0.510417	0.974359	0.84039	0.623932	0.72093	0.807018	0.419355	0.590805	0.97619	0.554367	0.5	1	0.578947		0.717302	0.377135	FALSE	FALSE	450		bin9	0.547619	0.631579	0.935484	0.969697	0.805358	0.907407	0.581197	0.544715	0.705166
bin10	0.558663	0.489418	0.975231	1	0.854545	0.824897	0.57115	0.52208	0.749127	0.675926	0.601525	0.925918	0.48403	0.52381	0.963292	1	1	0.470833	0.66415	0.512297	0.977658	0.859211	0.645299	0.715774	0.841945	0.44992	0.543931	0.954298	0.584863	0.48665	1	0.571335		0.718681	0.24692	FALSE	FALSE	500		bin10	0.511905	0.641372	0.942496	0.975949	0.858974	0.903651	0.588701	0.590997	0.739228
bin11	0.438657	0.57619	0.935102	1	0.917742	0.773479	0.556391	0.559035	0.71275	0.630967	0.598758	0.814365	0.496967	0.481481	0.984848	1	1	0.559052	0.696759	0.532401	0.933955	0.894231	0.596196	0.773643	0.819635	0.391774	0.541975	0.823687	0.636869	0.514881	1	0.592555		0.712011	0.0857977	FALSE	FALSE	550		bin11	0.388709	0.69057	0.924382	1	0.853551	0.915928	0.609087	0.604904	0.674705
bin12	0.5	0.555556	0.911565	0.942857	0.894489	0.751938	0.517781	0.495726	0.634921	0.592593	0.567568	0.586585	0.455285	0.473684	1	0.961625	1	0.525	0.626984	0.525253	0.799145	0.875	0.615385	0.713178	0.82906	0.451613	0.555556	0.698413	0.568627	0.527778	1	0.552632		0.678306	0.62882	FALSE	FALSE	600		bin12	0.388889	0.675439	0.903226	0.939394	0.869546	0.828571	0.564103	0.617886	0.672831
bin13	0.462963	0.547619	0.816327	0.87619	0.919192	0.72093	0.495495	0.521368	0.558279	0.518519	0.621622	0.361538	0.439024	0.445299	1	0.869578	1	0.55	0.648084	0.505051	0.592224	0.802083	0.561404	0.689922	0.82906	0.483871	0.544444	0.547619	0.490196	0.506944	0.935484	0.552632		0.637905	0.581608	FALSE	FALSE	650		bin13	0.285714	0.684211	0.870968	0.767442	0.878093	0.847619	0.504274	0.585366	0.575464
bin14	0.37963	0.492063	0.687075	0.780952	0.932518	0.744186	0.473684	0.521368	0.518783	0.428571	0.612613	0.361325	0.422764	0.422402	0.975	0.767677	1	0.533333	0.601626	0.494949	0.486486	0.806452	0.54386	0.677187	0.846154	0.483871	0.494253	0.492063	0.460784	0.486111	0.869534	0.552632		0.604685	0.270197	FALSE	FALSE	700		bin14	0.198413	0.657895	0.817204	0.735966	0.89374	0.852941	0.44332	0.585366	0.558333
bin15	0.36036	0.495935	0.632653	0.733333	0.924731	0.744186	0.464912	0.512821	0.481982	0.4	0.612613	0.358974	0.398374	0.440598	0.975	0.739084	1	0.541667	0.577236	0.505051	0.464438	0.806452	0.54386	0.690476	0.846154	0.483871	0.471264	0.515873	0.401961	0.472222	0.888889	0.552632		0.594925	0.18813	FALSE	FALSE	750		bin15	0.235772	0.684211	0.806452	0.753968	0.88989	0.843137	0.439721	0.570122	0.541667
bin16	0.333333	0.495935	0.55102	0.686275	0.90625	0.706349	0.447368	0.564103	0.5	0.361905	0.585586	0.386492	0.398374	0.441667	0.883333	0.65625	0.958889	0.541667	0.552846	0.484848	0.350877	0.784946	0.517544	0.698413	0.837607	0.494624	0.413793	0.611111	0.30303	0.486111	0.877778	0.552632		0.574092	0.107381	FALSE	FALSE	800		bin16	0.243902	0.675439	0.709677	0.730159	0.891892	0.833333	0.410256	0.575	0.567735
bin17	0.363363	0.487805	0.47619	0.636364	0.905242	0.690476	0.477952	0.57265	0.5	0.27619	0.594595	0.373984	0.406504	0.411752	0.617105	0.59375	0.84058	0.533333	0.560976	0.474747	0.292082	0.78125	0.517544	0.634921	0.760684	0.483871	0.425287	0.650794	0.242424	0.527778	0.758621	0.552632		0.54442	0.293275	FALSE	FALSE	850		bin17	0.260163	0.666667	0.548387	0.647561	0.878494	0.72549	0.411752	0.541667	0.588462
bin18	0.444444	0.495935	0.44898	0.530303	0.86082	0.706349	0.45045	0.589744	0.513514	0.2	0.558559	0.349593	0.395083	0.398077	0.417454	0.489583	0.594203	0.55	0.593496	0.434343	0.247863	0.747312	0.535088	0.595238	0.709402	0.494624	0.425287	0.571429	0.242424	0.493056	0.701149	0.552632		0.510514	0.129763	FALSE	FALSE	900		bin18	0.355014	0.649123	0.516129	0.651652	0.860999	0.689356	0.342105	0.508333	0.613462
bin19	0.450674	0.528455	0.455782	0.479167	0.878788	0.68254	0.410858	0.598291	0.522523	0.171429	0.531532	0.333333	0.357143	0.369658	0.358974	0.40625	0.402503	0.575	0.647764	0.424242	0.273504	0.733333	0.552632	0.555556	0.615385	0.494624	0.43555	0.468254	0.222222	0.465278	0.655172	0.552632		0.487783	0.0656997	FALSE	FALSE	950		bin19	0.439024	0.649123	0.483871	0.601707	0.86605	0.647619	0.342105	0.475	0.581911
bin20	0.491228	0.536585	0.462585	0.44086	0.868687	0.642857	0.438596	0.508772	0.44861	0.190476	0.477477	0.341463	0.351916	0.366667	0.321321	0.383065	0.349206	0.575	0.575	0.424242	0.301844	0.736201	0.598291	0.580952	0.564103	0.521864	0.52381	0.388889	0.212121	0.450483	0.643678	0.552632		0.477171	0.0203187	TRUE	FALSE	1000		bin20	0.487805	0.62826	0.483871	0.620783	0.864799	0.609524	0.41363	0.528862	0.575
bin21	0.457407	0.580217	0.432352	0.41146	0.875	0.647472	0.418468	0.522111	0.471148	0.264161	0.524458	0.383776	0.375529	0.345887	0.33312	0.313806	0.288384	0.585023	0.415921	0.445079	0.249065	0.739181	0.552945	0.477211	0.547619	0.52037	0.524995	0.391935	0.214583	0.467407	0.667393	0.560068		0.468861	0.098695	FALSE	FALSE	1050		bin21	0.50553	0.637877	0.44629	0.570582	0.850745	0.508485	0.34738	0.553326	0.617763
bin22	0.5	0.584688	0.462844	0.31875	0.903226	0.632007	0.377741	0.504762	0.431942	0.259031	0.502815	0.380238	0.360046	0.32193	0.304094	0.27475	0.273913	0.608333	0.470495	0.356209	0.31203	0.713735	0.578089	0.560847	0.469854	0.521505	0.505732	0.391204	0.154774	0.42803	0.661386	0.550845		0.45862	0.0387776	TRUE	FALSE	1100		bin22	0.534194	0.644479	0.418329	0.576754	0.801619	0.501307	0.382536	0.554164	0.570516
bin23	0.517544	0.571429	0.44898	0.313131	0.905242	0.666667	0.368421	0.517544	0.459459	0.25	0.468468	0.382114	0.357143	0.358333	0.299145	0.213038	0.253623	0.625	0.475	0.333333	0.289474	0.71875	0.564103	0.539683	0.452991	0.537634	0.535714	0.380952	0.131313	0.4375	0.666667	0.567568		0.456436	0.0623301	FALSE	FALSE	1150		bin23	0.544715	0.657895	0.461649	0.488192	0.803419	0.480672	0.444444	0.560976	0.558333
bin24	0.517544	0.571429	0.44898	0.232323	0.929293	0.658537	0.357041	0.535088	0.429825	0.296296	0.441441	0.414634	0.390244	0.375	0.307692	0.195707	0.25	0.583333	0.458333	0.343137	0.289474	0.666667	0.57265	0.515873	0.435897	0.548387	0.535714	0.391986	0.111111	0.409722	0.666667	0.55761		0.451176	0.0463963	TRUE	FALSE	1200		bin24	0.601626	0.657895	0.451613	0.454545	0.825	0.47619	0.491667	0.601626	0.571368
bin25	0.508772	0.571429	0.462585	0.219846	0.927083	0.669183	0.421053	0.5	0.410621	0.305556	0.432432	0.459543	0.398374	0.383333	0.290598	0.240048	0.25	0.594917	0.433333	0.352941	0.27193	0.65625	0.581197	0.507937	0.470085	0.533333	0.546388	0.344173	0.0707071	0.380952	0.677419	0.561404		0.451044	0.16603	FALSE	FALSE	1250		bin25	0.576268	0.631579	0.451613	0.438337	0.825	0.485714	0.491667	0.617886	0.552425
bin26	0.535088	0.547619	0.44898	0.232773	0.79798	0.698413	0.403509	0.45614	0.421053	0.282804	0.414414	0.398142	0.382114	0.441239	0.25641	0.199941	0.25	0.591318	0.475	0.30303	0.309942	0.59375	0.512821	0.436508	0.350427	0.455556	0.563218	0.33856	0.0722854	0.367347	0.623656	0.578947		0.429343	0.650952	FALSE	FALSE	1300		bin26	0.617886	0.614035	0.430108	0.380952	0.758333	0.495238	0.440385	0.55	0.544571
bin27	0.571598	0.492063	0.346939	0.27619	0.505916	0.63976	0.447368	0.464912	0.376068	0.209524	0.407407	0.389957	0.375919	0.55	0.222222	0.156863	0.180556	0.589744	0.552846	0.272727	0.330409	0.385417	0.517319	0.396825	0.25641	0.344444	0.413793	0.3	0.125	0.319728	0.537634	0.464912		0.38814	0.65917	FALSE	FALSE	1350		bin27	0.598171	0.605263	0.376344	0.222222	0.551068	0.583333	0.414031	0.5	0.517094
bin28	0.427875	0.47619	0.432624	0.27619	0.236075	0.593496	0.447368	0.491228	0.39853	0.290212	0.361111	0.437982	0.380952	0.621368	0.25641	0.166667	0.222222	0.6	0.552846	0.272727	0.342105	0.245296	0.526316	0.375046	0.230769	0.258065	0.333333	0.297561	0.177083	0.319728	0.366667	0.45614		0.370943	0.688068	FALSE	FALSE	1400		bin28	0.545732	0.587719	0.34023	0.218715	0.370986	0.522751	0.444197	0.458333	0.513514
bin29	0.37963	0.452381	0.404255	0.219048	0.189516	0.571429	0.438596	0.538462	0.504267	0.320168	0.361111	0.447154	0.380952	0.57119	0.25	0.176471	0.291667	0.5	0.647764	0.275568	0.345187	0.239583	0.570175	0.317829	0.230769	0.247312	0.321839	0.292683	0.302083	0.326531	0.288889	0.473684		0.371131	0.81642	FALSE	FALSE	1450		bin29	0.463415	0.587719	0.321839	0.248062	0.278228	0.419048	0.448268	0.441667	0.473684
bin30	0.419048	0.444444	0.468085	0.228571	0.1875	0.571429	0.46918	0.606838	0.530364	0.355742	0.466667	0.390244	0.428571	0.596581	0.4	0.211485	0.347222	0.466667	0.629915	0.252688	0.378992	0.260417	0.578947	0.325581	0.196581	0.27957	0.425287	0.325203	0.506384	0.340136	0.211111	0.5		0.399983	0.106638	FALSE	FALSE	1500		bin30	0.408053	0.526316	0.333333	0.232558	0.258659	0.333333	0.418089	0.45	0.433381
bin31	0.465241	0.411752	0.58156	0.238095	0.21875	0.52381	0.466371	0.632479	0.582546	0.485714	0.504233	0.421748	0.539683	0.641667	0.633333	0.247619	0.449275	0.458333	0.547009	0.293548	0.512821	0.301635	0.578947	0.472868	0.222222	0.311828	0.650192	0.406504	0.731183	0.367347	0.166667	0.464912		0.454059	0.0188248	TRUE	FALSE	1550		bin31	0.388889	0.552632	0.390805	0.2463	0.295547	0.219048	0.414634	0.45	0.364474
bin32	0.616162	0.504274	0.687943	0.304762	0.227273	0.414634	0.505051	0.666667	0.645974	0.666667	0.616931	0.376068	0.642857	0.658401	0.766667	0.32963	0.671937	0.433333	0.521368	0.259497	0.740891	0.460932	0.578947	0.625323	0.34188	0.365591	0.729885	0.471545	0.88172	0.47619	0.144444	0.421053		0.523578	0.00228251	TRUE	FALSE	1600		bin32	0.31746	0.438596	0.402299	0.305321	0.236842	0.2	0.4	0.458333	0.478632
bin33	0.698365	0.564103	0.756944	0.409524	0.351142	0.390244	0.5	0.666667	0.699648	0.752381	0.666667	0.464675	0.706349	0.708625	0.791667	0.444444	0.782609	0.425	0.525641	0.319227	0.810166	0.605018	0.534638	0.698413	0.529915	0.483871	0.678161	0.536585	0.924731	0.537415	0.295402	0.447368		0.58455	0.00010587	TRUE	TURE	1650		bin33	0.262719	0.416366	0.470854	0.44697	0.208959	0.235714	0.410256	0.425	0.477464
bin34	0.690643	0.596491	0.779974	0.609524	0.395833	0.386966	0.505051	0.649573	0.666667	0.838095	0.676471	0.468943	0.753968	0.54065	0.775	0.566667	0.820817	0.475	0.525641	0.30028	0.720721	0.733333	0.478632	0.761905	0.683761	0.55914	0.651067	0.615041	0.897701	0.659864	0.298851	0.526316		0.612768	0.000103975	TRUE	TURE	1700		bin34	0.297414	0.362745	0.512821	0.590909	0.290541	0.264859	0.428639	0.433333	0.512195
bin35	0.672947	0.636637	0.850691	0.695238	0.627451	0.504274	0.476431	0.606838	0.625298	0.87395	0.629531	0.570175	0.730159	0.475	0.773077	0.685714	0.854762	0.5	0.547009	0.254386	0.705311	0.776273	0.41363	0.792102	0.752137	0.580645	0.584656	0.65	0.849817	0.705499	0.377778	0.576577		0.636062	0.000217264	TRUE	TURE	1750		bin35	0.253086	0.329749	0.569326	0.681818	0.262185	0.292929	0.405405	0.458333	0.508755
bin36	0.861231	0.624242	0.764255	0.75014	0.699059	0.512821	0.457143	0.623932	0.552425	0.898619	0.707071	0.625178	0.68254	0.423718	0.760684	0.742857	0.839181	0.512393	0.558333	0.32634	0.751628	0.809707	0.438596	0.796748	0.794872	0.666667	0.513333	0.663889	0.813333	0.673611	0.455556	0.495495		0.649862	0.001212	TRUE	FALSE	1800		bin36	0.223569	0.315028	0.697949	0.712121	0.32672	0.262626	0.3999	0.516667	0.558772
bin37	0.722222	0.633803	0.721264	0.705882	0.759223	0.504274	0.439153	0.615385	0.495726	0.860196	0.709476	0.638889	0.653117	0.430949	0.769231	0.75014	0.913889	0.547009	0.571368	0.451852	0.676935	0.797486	0.5	0.795325	0.803419	0.731183	0.536891	0.663743	0.785628	0.6875	0.511494	0.491241		0.652309	0.000808446	TRUE	TURE	1850		bin37	0.39886	0.305115	0.703333	0.728682	0.411765	0.313131	0.407302	0.541667	0.566413
bin38	0.711111	0.653029	0.685556	0.714331	0.779127	0.535088	0.416881	0.538462	0.490517	0.846154	0.673946	0.648148	0.634146	0.415837	0.733888	0.784314	0.92619	0.564103	0.632479	0.444444	0.676329	0.854295	0.451162	0.844309	0.811966	0.763441	0.618908	0.694872	0.797258	0.697104	0.570197	0.583333		0.662216	0.000881742	TRUE	TURE	1900		bin38	0.722222	0.290476	0.746377	0.751938	0.434225	0.354167	0.417229	0.589744	0.526316
bin39	0.694444	0.645238	0.648939	0.760417	0.797486	0.547009	0.438095	0.538462	0.54386	0.862778	0.666667	0.657658	0.609756	0.472222	0.660131	0.754902	0.899327	0.57265	0.606838	0.444444	0.730159	0.753813	0.423423	0.812863	0.803419	0.763441	0.735516	0.715475	0.724458	0.659574	0.630952	0.555556		0.660312	0.00019453	TRUE	TURE	1950		bin39	0.466667	0.301743	0.683333	0.739941	0.472401	0.40625	0.466651	0.57265	0.426001
bin40	0.5	0.666667	0.62987	0.810484	0.845455	0.555556	0.429858	0.581197	0.454454	0.84058	0.685441	0.710526	0.617886	0.519048	0.499369	0.754902	0.857143	0.603464	0.606838	0.434524	0.763158	0.682158	0.432432	0.785539	0.803419	0.72043	0.725758	0.725	0.651786	0.659574	0.671076	0.542857		0.648951	8.83695e-05	TRUE	TURE	2000		bin40	0.4	0.358364	0.65	0.63705	0.483651	0.425739	0.471545	0.508772	0.410858
bin41	0.5	0.668981	0.571429	0.83321	0.864035	0.555556	0.372372	0.529915	0.471693	0.831423	0.666667	0.675439	0.666667	0.57611	0.44282	0.77451	0.822222	0.618421	0.566667	0.555556	0.679739	0.8	0.432432	0.827957	0.820513	0.677419	0.716667	0.735144	0.52381	0.659574	0.753086	0.542857		0.647903	5.18508e-05	TRUE	TURE	2050		bin41	0.466667	0.311111	0.612378	0.466667	0.484928	0.533333	0.487602	0.508547	0.51904
bin42	0.833333	0.488889	0.522974	0.802135	0.884532	0.538462	0.342593	0.521368	0.450089	0.830702	0.641975	0.696776	0.716338	0.663642	0.402557	0.813725	1	0.638095	0.547009	0.666667	0.699634	0.75	0.472222	0.837438	0.774419	0.645161	0.754762	0.780702	0.484848	0.659574	0.828924	0.542857		0.663513	1.12993e-05	TRUE	TURE	2100		bin42	0.555556	0.361111	0.5875	0.350179	0.555024	0.544444	0.512821	0.513052	0.50946
bin43	1	0.538462	0.415033	0.76359	0.882353	0.539136	0.388889	0.588694	0.532616	0.775758	0.627825	0.702558	0.587087	0.685577	0.519487	0.813725	1	0.590476	0.589744	0.888889	0.64289	0.678571	0.547354	0.828718	0.756757	0.555556	0.888889	0.810811	0.466667	0.645833	0.857143	0.495238		0.675135	7.89104e-06	TRUE	TURE	2150		bin43	1	0.428571	0.577778	0.238502	0.589938	0.499617	0.517094	0.531532	0.504753
bin44	1	0.573932	0.325708	0.718599	0.641013	0.562352	0.378378	0.566138	0.602682	0.785185	0.591787	0.681682	0.599327	0.72619	0.430556	0.777778	1	0.607843	0.617409	1	0.537037	0.698413	0.607843	0.777417	0.668919	0.436782	1	0.836587	0.481481	0.604167	0.853616	0.438095		0.660216	1.07138e-05	TRUE	TURE	2200		bin44	0.5	0.434524	0.533333	0.203922	0.583333	0.470443	0.516667	0.522523	0.479167
bin45	NaN	0.592593	0.352941	0.666667	0.544643	0.470588	0.396396	0.504762	0.745421	0.719577	0.627141	0.62037	0.551136	0.73359	0.409656	0.724116	1	0.580354	0.642959	1	0.595238	0.65	0.627451	0.844551	0.6	0.418309	1	0.807018	0.689947	0.608599	0.853616	0.419048		0.645054	2.81821e-06	TRUE	TURE	2250		bin45	0.666667	0.5	0.430159	0.187879	0.243687	0.464286	0.533333	0.513514	0.431326
bin46	NaN	0.625	0.441026	0.634481	0.416667	0.40404	0.414414	0.533333	0.771248	0.555556	0.593074	0.61911	0.5	0.699495	0.428571	0.709677	1	0.557882	0.666667	1	0.714286	0.722222	0.656863	0.877778	0.519328	0.382716	NaN	0.842105	0.8	0.599907	0.911817	0.457143		0.635147	1.86001e-07	TRUE	TURE	2300		bin46	1	0.394444	0.309524	0.222426	0.166667	0.38141	0.508333	0.486486	0.433862
bin47	NaN	0.607143	0.307692	0.6	0.343434	0.458333	0.421053	0.485714	0.821429	0.444444	0.515789	0.63616	0.535714	0.723665	0.48584	0.661846	1	0.583333	0.666183	1	0.722222	0.666667	0.690657	0.884259	0.529412	0.424976	NaN	0.872873	0.722222	0.544466	0.895257	0.466667		0.623915	8.89021e-08	TRUE	TURE	2350		bin47	1	0.333333	0.209524	0.128019	0.327778	0.347003	0.483333	0.461579	0.319829
bin48	NaN	0.557143	0.392968	0.578947	0.277778	0.46875	0.368421	0.495238	0.796157	0.333333	0.538126	0.68155	0.537037	0.719688	0.612372	0.586207	1	0.576923	0.652778	NaN	0.833333	0.666667	0.677778	0.863095	0.516129	0.428718	NaN	0.890431	0.75	0.488188	0.815539	0.495238		0.606846	3.17283e-07	TRUE	TURE	2400		bin48	1	0.333333	0.133333	0.19639	0.533333	0.338889	0.445299	0.383838	0.222222
bin49	NaN	0.6	0.545455	0.520915	0.331349	0.505376	0.368421	0.557703	0.70614	0.666667	0.607843	0.63141	0.546667	0.740741	0.666667	0.566138	1	0.610628	0.510417	NaN	0.822222	0.666667	0.617451	0.857143	0.6	0.424444	NaN	0.934767	0.75	0.452381	0.710648	0.462963		0.620042	3.09313e-07	TRUE	TURE	2450		bin49	1	0.444444	0.214286	0.201923	0.533333	0.3	0.432265	0.383333	0.146825
bin50	NaN	0.666667	0.616667	0.487179	0.365079	0.494624	0.394737	0.558824	0.736842	0.583333	0.705882	0.621111	0.573333	0.753704	0.681548	0.532308	NaN	0.640686	0.520833	NaN	1	1	0.604938	0.830159	0.525185	0.414141	NaN	0.926808	0.75	0.428571	0.668651	0.444444		0.625938	2.26059e-06	TRUE	TURE	2500		bin50	1	0.888889	0.281136	0.369658	0.5	0.266667	0.441667	0.390805	0.22619
AVE																																								AVE
SP GOOD																																								SP GOOD
CUED	S401	S404	S406	S407	S409	S412	S414	S415	S417	S418	S419	S421	S422	S423	S424	S425	S426	S427	S429	S430	S431	S432	S433	S437	S438	S439	S440	S441	S442	S444	S447	S448		AVE	T-test			time (ms)		UNCUED	S401	S404	S406	S407	S409	S412	S414	S415	S417
bin1	0.555556	0.505376	0.588235	0.526316	0.465538	0.463412	0.575661	0.585366	0.545455	0.547009	0.438095	0.661836	0.448677	0.522727	0.57265	0.621622	0.5	0.45614	0.481481	0.666667	0.431373	0.666667	0.422969	0.59596	0.535354	0.436508	0.635417	0.566667	0.365266	0.585366	0.522523	0.377193		0.527159	0.241979	FALSE	FALSE	50		bin1	0.612403	0.46216	0.666667	0.552632	0.503876	0.597222	0.492063	0.529915	0.53125
bin2	0.592593	0.483871	0.568627	0.517544	0.470588	0.472727	0.601681	0.566667	0.545455	0.529915	0.417367	0.639057	0.45098	0.496124	0.538462	0.630631	0.47619	0.464912	0.462963	0.615385	0.411765	0.666667	0.447619	0.626263	0.535354	0.468254	0.625	0.555556	0.393939	0.577236	0.513514	0.368421		0.522854	0.229419	FALSE	FALSE	100		bin2	0.573643	0.468963	0.64581	0.614035	0.488372	0.569444	0.484127	0.521368	0.54072
bin3	0.555556	0.483871	0.568627	0.539136	0.441176	0.440476	0.529412	0.537398	0.557082	0.623932	0.461345	0.614851	0.441176	0.511628	0.552632	0.576577	0.511905	0.464912	0.457143	0.589744	0.392157	0.666667	0.495238	0.606061	0.535354	0.452381	0.625	0.564103	0.399881	0.601626	0.504505	0.394737		0.521759	0.159928	FALSE	FALSE	150		bin3	0.534884	0.458333	0.613636	0.605263	0.5	0.583333	0.5	0.512821	0.535985
bin4	0.555556	0.483871	0.54902	0.564103	0.470588	0.452381	0.504762	0.520325	0.528068	0.641026	0.504762	0.601449	0.441176	0.507937	0.561404	0.567568	0.488095	0.473684	0.495238	0.591823	0.392157	0.677419	0.552381	0.5625	0.535354	0.484127	0.59375	0.553455	0.411765	0.543554	0.531532	0.412281		0.523535	0.143087	FALSE	FALSE	200		bin4	0.51938	0.444444	0.560606	0.605263	0.5	0.555556	0.507937	0.51327	0.53125
bin5	0.509259	0.483871	0.745098	0.74359	0.519608	0.529762	0.494958	0.536585	0.546881	0.623932	0.504762	0.668599	0.558824	0.5	0.561404	0.612613	0.52381	0.473684	0.914286	0.643196	0.421569	0.827957	0.638095	0.572917	0.555556	0.690476	0.75	0.658537	0.568627	0.499806	0.675676	0.421053		0.592968	0.366173	FALSE	FALSE	250		bin5	0.527132	0.458333	0.765152	0.765525	0.5	0.611111	0.567751	0.605263	0.5625
bin6	0.518519	0.462366	0.970588	0.880342	0.558824	0.696429	0.642602	0.560976	0.563492	0.717949	0.542857	0.789855	0.780452	0.539683	0.72987	0.783784	0.75	0.491228	0.961905	0.598151	0.614973	0.913978	0.704762	0.614583	0.555556	0.785714	0.791667	0.92622	0.764706	0.571429	0.927928	0.438596		0.692187	0.660228	FALSE	FALSE	300		bin6	0.534884	0.479167	0.954545	0.926829	0.580952	0.777778	0.62892	0.631579	0.747984
bin7	0.509259	0.483871	0.970588	0.974359	0.715686	0.89881	0.79798	0.560976	0.773858	0.82906	0.6	0.942029	0.838384	0.568931	0.888889	0.963964	0.857143	0.605263	0.971429	0.612613	0.892157	1	0.847619	0.708333	0.59596	0.880952	0.833333	1	0.870469	0.730159	0.990991	0.45614		0.786538	0.755401	FALSE	FALSE	350		bin7	0.550388	0.486111	1	0.99187	0.721748	0.916667	0.730159	0.675439	0.953172
bin8	0.481481	0.526882	1	1	0.823529	0.958333	0.805602	0.577236	0.910093	0.863248	0.647619	0.978261	0.909982	0.536005	0.982906	1	1	0.649123	0.941737	0.603604	0.969697	1	0.857143	0.808468	0.707071	0.920635	0.84375	1	0.949495	0.753968	1	0.447368		0.826664	0.905522	FALSE	FALSE	400		bin8	0.583333	0.506803	0.985017	1	0.832892	0.958333	0.814557	0.701754	1
bin9	0.453704	0.548387	1	1	0.844818	0.975758	0.828571	0.601626	0.934847	0.941667	0.628571	0.978261	0.882353	0.551126	1	1	1	0.675439	0.893838	0.592935	1	1	0.857143	0.83871	0.752525	0.960317	0.84375	1	0.936492	0.73616	1	0.486974		0.835749	0.899368	FALSE	FALSE	450		bin9	0.541931	0.590278	1	1	0.855742	0.958333	0.829268	0.710526	1
bin10	0.417927	0.541002	1	1	0.837662	0.986187	0.825127	0.608333	0.927048	0.958647	0.595726	0.930604	0.866359	0.579587	1	1	1	0.694607	0.79884	0.628583	1	1	0.839389	0.851175	0.730491	0.980759	0.816964	1	0.826932	0.714782	1	0.5		0.826773	0.464641	FALSE	FALSE	500		bin10	0.474891	0.618605	1	0.990476	0.851748	0.89441	0.831548	0.727778	0.986111
bin11	0.374074	0.546147	1	0.991453	0.87619	0.980471	0.855742	0.571196	0.862573	0.948649	0.582437	0.948148	0.897048	0.602519	1	1	1	0.651669	0.738588	0.563048	1	1	0.851232	0.856867	0.75	0.974323	0.794643	1	0.65233	0.752252	1	0.525284		0.81709	0.914119	FALSE	FALSE	550		bin11	0.494652	0.630342	1	0.96748	0.855981	0.925693	0.815549	0.695906	0.841734
bin12	0.333333	0.548387	0.980392	0.957265	0.904762	0.993939	0.819048	0.585366	0.807692	0.958333	0.556349	0.77037	0.838095	0.626984	1	1	1	0.72807	0.657143	0.548601	1	0.967742	0.828571	0.854167	0.75	0.97619	0.729167	1	0.526882	0.793651	1	0.561404		0.80006	0.734713	FALSE	FALSE	600		bin12	0.477273	0.625	1	0.910569	0.878049	0.913043	0.837398	0.701754	0.777778
bin13	0.287037	0.537634	0.931373	0.803419	0.914286	1	0.764286	0.552846	0.674797	0.817364	0.47619	0.525926	0.742857	0.554817	1	1	1	0.684211	0.571429	0.513514	0.969697	0.935484	0.847619	0.75	0.770833	0.968254	0.666667	1	0.408602	0.785714	1	0.526316		0.749412	0.222887	FALSE	FALSE	650		bin13	0.527132	0.597222	0.992593	0.918699	0.878049	0.927536	0.836179	0.689834	0.747339
bin14	0.268519	0.526882	0.882353	0.735043	0.914286	1	0.72619	0.512195	0.613034	0.707602	0.409524	0.492593	0.72381	0.484127	1	1	1	0.684211	0.52381	0.495495	0.936828	0.892473	0.847619	0.729167	0.770833	0.951994	0.614583	0.98374	0.365591	0.793651	1	0.535088		0.722539	0.231573	FALSE	FALSE	700		bin14	0.503876	0.583333	0.977778	0.867236	0.878049	0.956522	0.772358	0.700855	0.752381
bin15	0.25	0.505376	0.803922	0.735043	0.911765	0.994048	0.663757	0.512195	0.528262	0.648148	0.4	0.533333	0.714286	0.496124	1	1	1	0.666667	0.52381	0.459459	0.857323	0.870968	0.857143	0.71875	0.744624	0.926829	0.59375	0.950203	0.373835	0.824042	1	0.552632		0.706759	0.455625	FALSE	FALSE	750		bin15	0.457364	0.583333	0.917845	0.852252	0.879017	0.956522	0.691057	0.683761	0.699941
bin16	0.25	0.516129	0.617647	0.726496	0.909982	0.970238	0.518519	0.512195	0.515504	0.533333	0.390476	0.474074	0.686275	0.492248	0.964912	0.989899	0.940476	0.614035	0.411765	0.432432	0.782828	0.845878	0.809524	0.635417	0.739583	0.869919	0.572917	0.825	0.362724	0.796748	0.990741	0.526316		0.663257	0.70087	FALSE	FALSE	800		bin16	0.48062	0.597222	0.727273	0.82313	0.878049	0.956522	0.642276	0.649573	0.690137
bin17	0.231481	0.516129	0.539216	0.660503	0.907197	0.909091	0.509259	0.512195	0.507752	0.457143	0.4	0.462795	0.54902	0.458069	0.868421	0.929293	0.738095	0.552632	0.411765	0.432432	0.489583	0.766667	0.685714	0.625	0.680556	0.707317	0.447917	0.674797	0.340502	0.741967	0.833333	0.526316		0.596005	0.417292	FALSE	FALSE	850		bin17	0.450493	0.604167	0.564834	0.769756	0.887147	0.956522	0.626016	0.65812	0.645833
bin18	0.277778	0.505376	0.509804	0.611111	0.909091	0.824242	0.491248	0.479675	0.503876	0.37479	0.380952	0.530303	0.431373	0.456626	0.719298	0.771836	0.47619	0.45614	0.401961	0.407065	0.387626	0.713978	0.647619	0.59375	0.606061	0.601626	0.447917	0.590041	0.322222	0.731707	0.669841	0.552632		0.543242	0.309749	FALSE	FALSE	900		bin18	0.431818	0.611111	0.48062	0.734681	0.903213	0.797101	0.616714	0.632479	0.65625
bin19	0.324074	0.483871	0.5	0.648148	0.908144	0.775758	0.489602	0.471545	0.495935	0.367725	0.419048	0.595652	0.372549	0.488372	0.654576	0.666667	0.392857	0.394737	0.359104	0.394737	0.383838	0.670115	0.542857	0.515783	0.606061	0.560976	0.427083	0.545528	0.244444	0.715447	0.552381	0.561404		0.516532	0.730076	FALSE	FALSE	950		bin19	0.378788	0.611111	0.464378	0.714277	0.887147	0.724638	0.587719	0.57265	0.673203
bin20	0.37854	0.501152	0.472727	0.65003	0.914738	0.723906	0.439951	0.461724	0.49639	0.369033	0.437229	0.592593	0.376114	0.504065	0.563858	0.515121	0.3663	0.433083	0.380515	0.437622	0.393679	0.655172	0.4851	0.447917	0.600134	0.555043	0.468449	0.575317	0.182716	0.586789	0.575163	0.545295		0.502671	0.944531	FALSE	FALSE	1000		bin20	0.379527	0.595623	0.446765	0.683273	0.887255	0.691041	0.55668	0.561434	0.694197
bin21	0.38287	0.505731	0.432589	0.637893	0.899964	0.703902	0.467654	0.476942	0.469048	0.372024	0.432413	0.591181	0.397895	0.567517	0.508889	0.426437	0.317251	0.409314	0.450431	0.498282	0.345432	0.608395	0.419685	0.439474	0.553968	0.509804	0.537968	0.528736	0.2663	0.491396	0.462302	0.472469		0.487005	0.910853	FALSE	FALSE	1050		bin21	0.407639	0.638808	0.429856	0.699794	0.868316	0.664082	0.4625	0.550245	0.629195
bin22	0.407407	0.516129	0.379289	0.62963	0.944444	0.672956	0.485434	0.455285	0.472868	0.351852	0.47672	0.565217	0.352941	0.565011	0.477477	0.353535	0.296296	0.412281	0.457143	0.447368	0.40176	0.666667	0.409524	0.418952	0.525568	0.531746	0.554122	0.535185	0.208602	0.432249	0.47619	0.473684		0.479798	0.598978	FALSE	FALSE	1100		bin22	0.399711	0.625	0.370341	0.569816	0.871795	0.597222	0.487805	0.589744	0.617647
bin23	0.444444	0.5	0.362745	0.564815	0.923297	0.647799	0.444444	0.504065	0.461416	0.39284	0.398148	0.536232	0.323529	0.534884	0.486486	0.235294	0.296296	0.394737	0.447619	0.403509	0.424242	0.666667	0.438095	0.4	0.45928	0.547619	0.634409	0.5	0.2	0.436508	0.542857	0.473684		0.469561	0.595137	FALSE	FALSE	1150		bin23	0.393939	0.597222	0.362963	0.543697	0.868421	0.541667	0.475803	0.632479	0.598039
bin24	0.444444	0.5	0.372549	0.504505	0.894489	0.628931	0.484848	0.479675	0.446089	0.368421	0.345767	0.557971	0.320448	0.527132	0.458709	0.137255	0.296296	0.447368	0.447619	0.429825	0.424242	0.677419	0.457143	0.388889	0.373737	0.547619	0.645161	0.483333	0.184946	0.428571	0.453704	0.464912		0.456938	0.942707	FALSE	FALSE	1200		bin24	0.44697	0.618056	0.37037	0.476984	0.902798	0.541667	0.532937	0.606838	0.569816
bin25	0.444444	0.5	0.352941	0.485714	0.854167	0.641026	0.509804	0.455285	0.44697	0.342105	0.292593	0.551208	0.342857	0.496124	0.416667	0.0882353	0.296296	0.473684	0.457143	0.403509	0.424242	0.677419	0.428571	0.401792	0.333333	0.531746	0.602151	0.45935	0.11828	0.428571	0.37963	0.45614		0.440375	0.922677	FALSE	FALSE	1250		bin25	0.44697	0.602749	0.318841	0.426901	0.822457	0.527778	0.47619	0.606838	0.578431
bin26	0.444444	0.477778	0.323529	0.336772	0.665441	0.628205	0.485434	0.439024	0.416667	0.307692	0.142857	0.466667	0.372473	0.515152	0.333333	0.100119	0.234568	0.45614	0.428571	0.403509	0.450089	0.65914	0.352381	0.408602	0.272727	0.468254	0.44086	0.44248	0.0659498	0.420635	0.231481	0.342105		0.391659	0.884685	FALSE	FALSE	1300		bin26	0.462121	0.564626	0.248148	0.291667	0.658915	0.472222	0.484127	0.598291	0.618687
bin27	0.453704	0.466667	0.372549	0.25	0.340593	0.647436	0.428805	0.390244	0.405483	0.298246	0.150794	0.392593	0.424242	0.541755	0.267899	0.151515	0.222222	0.496207	0.466387	0.436687	0.45514	0.611111	0.457143	0.225806	0.141414	0.452381	0.330309	0.384615	0.107527	0.349206	0.2	0.350877		0.364674	0.538841	FALSE	FALSE	1350		bin27	0.511628	0.530612	0.17504	0.163618	0.367063	0.513889	0.419086	0.555556	0.68024
bin28	0.462963	0.444444	0.382353	0.229229	0.217204	0.614054	0.388889	0.414634	0.376113	0.307018	0.138889	0.318519	0.393939	0.515504	0.327485	0.151515	0.320988	0.531532	0.54902	0.450658	0.428662	0.455556	0.485714	0.172043	0.191919	0.380952	0.28125	0.358974	0.172043	0.333333	0.171429	0.447368		0.356694	0.299881	FALSE	FALSE	1400		bin28	0.55814	0.564626	0.192593	0.12378	0.264957	0.472222	0.422532	0.547009	0.592299
bin29	0.527778	0.461649	0.401961	0.243243	0.15961	0.515723	0.358466	0.463415	0.435153	0.318938	0.171429	0.311111	0.444444	0.516067	0.347728	0.151515	0.37037	0.495495	0.54902	0.450368	0.40625	0.29319	0.485714	0.150538	0.232323	0.365079	0.291667	0.376068	0.344086	0.333333	0.142857	0.438596		0.361037	0.119939	FALSE	FALSE	1450		bin29	0.55814	0.534155	0.214815	0.139228	0.239316	0.361111	0.377033	0.526316	0.568627
bin30	0.555556	0.477778	0.441176	0.24314	0.130466	0.440252	0.336508	0.439024	0.488192	0.327778	0.212963	0.34596	0.525253	0.536585	0.368421	0.151515	0.440476	0.459459	0.568627	0.545079	0.479167	0.337276	0.485714	0.204301	0.242424	0.253968	0.34375	0.375	0.458333	0.34127	0.114286	0.438596		0.378384	0.0274492	TRUE	FALSE	1500		bin30	0.550388	0.472222	0.348148	0.12378	0.137698	0.402778	0.385163	0.508772	0.529132
bin31	0.617003	0.447455	0.656863	0.307692	0.156705	0.457239	0.339683	0.430894	0.545122	0.358333	0.388889	0.366455	0.590315	0.548393	0.412281	0.171717	0.583333	0.451399	0.568627	0.52185	0.53629	0.322581	0.447619	0.397849	0.229167	0.349206	0.522222	0.475	0.666667	0.370693	0.104762	0.5		0.432572	0.000732529	TRUE	TURE	1550		bin31	0.438689	0.464687	0.413973	0.243902	0.118803	0.5	0.408297	0.508772	0.432773
bin32	0.673183	0.512787	0.747475	0.478632	0.180444	0.478788	0.367989	0.463415	0.600077	0.491667	0.490741	0.422296	0.598039	0.579365	0.517544	0.313131	0.645944	0.482456	0.558824	0.517544	0.489583	0.417921	0.447619	0.548387	0.253024	0.349206	0.677778	0.641667	0.777778	0.452381	0.233613	0.526316		0.497988	0.000136583	TRUE	TURE	1600		bin32	0.322493	0.4375	0.508949	0.388618	0.154971	0.5	0.457692	0.481982	0.343137
bin33	0.637004	0.604938	0.830075	0.547009	0.236716	0.442424	0.386436	0.504065	0.601698	0.566667	0.537037	0.47619	0.539216	0.601626	0.675439	0.424242	0.717949	0.482456	0.519608	0.539216	0.505051	0.566667	0.52381	0.741935	0.43078	0.388889	0.666667	0.720513	0.822917	0.595238	0.436695	0.517544		0.555835	0.000210749	TRUE	TURE	1650		bin33	0.254724	0.434415	0.608204	0.533333	0.155196	0.444444	0.466667	0.468943	0.326797
bin34	0.654541	0.567901	0.862069	0.623932	0.402778	0.448485	0.461304	0.512195	0.612403	0.666667	0.703704	0.515873	0.568627	0.604723	0.657895	0.535354	0.805641	0.522285	0.520202	0.698413	0.515152	0.675351	0.457143	0.795699	0.614583	0.444444	0.7	0.769231	0.832949	0.642857	0.588235	0.526316		0.609592	0.000303189	TRUE	TURE	1700		bin34	0.289595	0.442565	0.654062	0.622009	0.238353	0.416667	0.420085	0.530364	0.290255
bin35	0.675214	0.650047	0.843217	0.709402	0.543369	0.454097	0.504497	0.504065	0.64581	0.7	0.777778	0.626984	0.62493	0.604917	0.710526	0.616162	0.897727	0.576577	0.545455	0.641026	0.501078	0.704106	0.52381	0.827957	0.771027	0.47619	0.727586	0.735043	0.809524	0.653504	0.686275	0.508772		0.649271	0.000352777	TRUE	TURE	1750		bin35	0.291226	0.40837	0.714337	0.74348	0.331422	0.444444	0.466865	0.529915	0.323419
bin36	0.727273	0.658555	0.786667	0.750337	0.688172	0.430213	0.630631	0.455285	0.676877	0.695311	0.787037	0.652846	0.638095	0.64581	0.745614	0.686869	0.942892	0.594595	0.535354	0.742424	0.529557	0.755652	0.52381	0.902151	0.84039	0.484127	0.786472	0.706928	0.771852	0.634146	0.735294	0.54386		0.677659	0.000241991	TRUE	TURE	1800		bin36	0.255615	0.425925	0.68254	0.761024	0.418571	0.464976	0.475407	0.461538	0.352288
bin37	0.790476	0.692641	0.670556	0.81247	0.792063	0.448718	0.590841	0.390244	0.594919	0.657658	0.805556	0.650407	0.67619	0.648084	0.675439	0.737374	0.931303	0.567568	0.525253	0.869048	0.620608	0.800926	0.485154	0.896552	0.8125	0.547619	0.75612	0.702703	0.716717	0.617886	0.77451	0.552632		0.681585	0.000689936	TRUE	TURE	1850		bin37	0.490476	0.424837	0.620133	0.763514	0.47619	0.535024	0.487398	0.478632	0.426611
bin38	0.819048	0.755221	0.677489	0.851852	0.874855	0.500251	0.537831	0.373984	0.591667	0.675676	0.814815	0.650407	0.673128	0.672777	0.679365	0.757576	1	0.546318	0.556818	0.777778	0.692308	0.779487	0.470588	0.896552	0.851478	0.547619	0.661616	0.657658	0.661111	0.64518	0.818182	0.561404		0.688439	0.00132831	TRUE	FALSE	1900		bin38	0.5	0.499629	0.586667	0.745098	0.567019	0.472222	0.528455	0.478632	0.621324
bin39	1	0.845437	0.738095	0.827653	0.925497	0.555556	0.6	0.373984	0.486955	0.673203	0.842593	0.691057	0.709677	0.669264	0.69697	0.777778	1	0.541542	0.572917	0.622222	0.653846	0.732601	0.480392	0.884501	0.818182	0.504065	0.530911	0.590841	0.608333	0.661499	0.848485	0.587719		0.689118	0.000816819	TRUE	TURE	1950		bin39	0.5	0.414129	0.586667	0.67417	0.560287	0.528382	0.552846	0.461538	0.65625
bin40	1	0.849817	0.610526	0.742424	0.899123	0.62	0.628571	0.341463	0.412281	0.614583	0.776471	0.764228	0.750179	0.75	0.659834	0.787879	1	0.514286	0.620968	0.655556	0.527778	0.829138	0.575758	0.828283	0.826705	0.524797	0.421296	0.619048	0.6	0.635659	0.848485	0.482456		0.678675	0.000375954	TRUE	TURE	2000		bin40	0.5	0.429293	0.541135	0.546296	0.5	0.478261	0.57378	0.444444	0.618687
bin41	1	0.770202	0.579657	0.741935	0.808279	0.601507	0.648649	0.373984	0.529354	0.541093	0.777778	0.768496	0.806897	0.741935	0.666804	0.78125	1	0.537582	0.587097	0.555556	0.547733	0.859259	0.606061	0.815296	0.774194	0.633333	0.437302	0.63964	0.451709	0.620155	0.857323	0.473684		0.672929	2.29275e-05	TRUE	TURE	2050		bin41	0.5	0.411111	0.343434	0.42588	0.589669	0.449275	0.55	0.461538	0.598169
bin42	1	0.818182	0.458333	0.755556	0.743791	0.640347	0.648649	0.357724	0.593995	0.472222	0.717172	0.75	0.758621	0.637634	0.679012	0.75	1	0.520518	0.611111	0	0.470395	0.740741	0.686869	0.796491	0.745296	0.65	0.484848	0.678929	0.515152	0.643411	0.862069	0.473684		0.645648	1.83744e-05	TRUE	TURE	2100		bin42	0.388889	0.378676	0.333333	0.380682	0.664308	0.347826	0.583333	0.469636	0.602151
bin43	1	0.621032	0.347222	0.761905	0.711111	0.706734	0.612613	0.357724	0.585013	0.413647	0.703943	0.771154	0.763736	0.675827	0.800855	0.75	1	0.479167	0.647373	0	0.4125	0.603175	0.700758	0.824561	0.65625	0.533333	0.490079	0.682275	0.533333	0.604651	0.85348	0.464912		0.627136	5.57705e-05	TRUE	TURE	2150		bin43	0.333333	0.316239	0.3	0.302083	0.575758	0.328063	0.609756	0.518255	0.555556
bin44	1	0.722222	0.286691	0.712829	0.615995	0.744096	0.590841	0.361538	0.59987	0.334996	0.654899	0.791273	0.805128	0.680556	0.816425	0.770833	1	0.521841	0.690476	0	0.52735	0.644444	0.7	0.77342	0.638105	0.546154	0.644444	0.693627	0.47619	0.51938	0.879732	0.438596		0.630686	1.6582e-06	TRUE	TURE	2200		bin44	0.444444	0.217949	0.254386	0.206452	0.393939	0.365079	0.623887	0.585586	0.46129
bin45	1	0.84127	0.251166	0.80303	0.430361	0.747967	0.6001	0.487179	0.617361	0.384314	0.615385	0.754386	0.742424	0.695268	0.72207	0.75	1	0.644556	0.714286	1	0.649573	0.6	0.659004	0.754902	0.601533	0.5	0.6	0.696057	0.47619	0.534884	0.83531	0.45614		0.661397	4.08393e-07	TRUE	TURE	2250		bin45	0.833333	0.234848	0.245614	0.197491	0.211111	0.460317	0.603252	0.558559	0.448589
bin46	1	0.822222	0.233333	0.821599	0.315476	0.693767	0.576577	0.553817	0.629119	0.466667	0.556763	0.719298	0.69697	0.677778	0.569201	0.683804	1	0.654899	0.679012	1	0.751852	0.6	0.647373	0.842266	0.521429	0.454191	0.477778	0.758621	0.666667	0.536005	0.749582	0.508772		0.652026	5.73257e-07	TRUE	TURE	2300		bin46	1	0.0416667	0.157895	0.211111	0	0.47619	0.641667	0.558559	0.37
bin47	1	0.783333	0.2	0.784995	0.285714	0.643275	0.583333	0.555556	0.670635	0.484848	0.42029	0.678803	0.681818	0.579657	0.490196	0.603943	NaN	0.737892	0.666667	1	0.652778	0.6	0.609347	0.916278	0.433422	0.505645	0.833333	0.795402	0.904762	0.512195	0.66476	0.561404		0.640009	1.15405e-06	TRUE	TURE	2350		bin47	1	0.115741	0.163743	0.223727	0.111111	0.492063	0.677642	0.499471	0.359307
bin48	1	0.666667	0	0.783654	0.285714	0.654233	0.583333	0.644974	0.689275	0.611111	0.287879	0.666667	0.62482	0.609722	0.5	0.562069	NaN	0.764203	0.679012	1	0.696429	0.733333	0.569801	0.90303	0.45679	0.563844	1	0.811987	1	0.529915	0.583333	0.570175		0.646193	5.34552e-06	TRUE	TURE	2400		bin48	1	0	0.258201	0.19765	0.388889	0.499165	0.707317	0.469055	0.24127
bin49	NaN	0.5	0	0.762759	0.31746	0.62493	0.583333	0.67619	0.730479	0.676768	0.270677	0.727839	0.606349	0.656566	0.48547	0.55305	NaN	0.772414	0.691358	1	0.68254	0.694444	0.606154	0.891667	0.432099	0.533716	1	0.812441	1	0.508778	0.630769	0.526316		0.631819	4.87386e-06	TRUE	TURE	2450		bin49	1	0	0.307692	0.141558	0.5	0.473684	0.699187	0.451613	0.218324
bin50	NaN	0.333333	0	0.64289	0.466667	0.520202	0.609524	0.703704	0.661397	0.757937	0.277778	0.701026	0.566667	0.727273	0.606566	0.597497	NaN	0.796491	0.666667	1	0.644444	0.444444	0.625	0.68254	0.375119	0.530898	NaN	0.811111	1	0.522523	0.683761	0.473684		0.601005	9.99581e-07	TRUE	TURE	2500		bin50	NaN	0	0.284382	0.278351	0.5	0.473684	0.672222	0.419355	0.261029
AVE																																								AVE
SP BAD																																								SP BAD
CUED	S401	S404	S406	S407	S409	S412	S414	S415	S417	S418	S419	S421	S422	S423	S424	S425	S426	S427	S429	S430	S431	S432	S433	S437	S438	S439	S440	S441	S442	S444	S447	S448		AVE	T-test			time (ms)		UNCUED	S401	S404	S406	S407	S409	S412	S414	S415	S417
bin1	0.456303	0.458943	0.454545	0.558824	0.358466	0.583333	0.43554	0.369369	0.515878	0.464912	0.603175	0.504762	0.545455	0.536585	0.572464	0.626016	0.474359	0.588652	0.436508	0.537037	0.513514	0.708333	0.504065	0.47672	0.398374	0.469697	0.482456	0.472222	0.438095	0.487393	0.535088	0.6		0.505221	0.363005	FALSE	FALSE	50		bin1	0.418605	0.564103	0.565217	0.467276	0.565227	0.427778	0.588889	0.436508	0.611111
bin2	0.480392	0.471545	0.464646	0.558824	0.329972	0.55	0.471545	0.387387	0.527875	0.465587	0.595238	0.5	0.522727	0.528862	0.536232	0.609756	0.5	0.574468	0.460317	0.583333	0.531532	0.708333	0.504065	0.480392	0.398374	0.454545	0.45045	0.486486	0.438095	0.508547	0.583333	0.6		0.508214	0.509388	FALSE	FALSE	100		bin2	0.372093	0.564103	0.57971	0.495935	0.5844	0.411111	0.578078	0.412698	0.611111
bin3	0.509804	0.463415	0.510417	0.607843	0.323529	0.533333	0.455865	0.423423	0.5	0.487179	0.588657	0.518783	0.5	0.528455	0.521277	0.560976	0.481481	0.546099	0.484127	0.565873	0.541291	0.722222	0.483333	0.45098	0.406504	0.44697	0.441441	0.486486	0.457143	0.527875	0.583333	0.558333		0.506764	0.514178	FALSE	FALSE	150		bin3	0.403101	0.547009	0.57971	0.495935	0.60716	0.435782	0.594595	0.390244	0.6
bin4	0.480392	0.439024	0.555556	0.673109	0.339496	0.533333	0.499806	0.405405	0.515873	0.478632	0.579365	0.533333	0.5	0.504065	0.567376	0.569106	0.481481	0.496454	0.548587	0.532804	0.54955	0.722222	0.458333	0.441176	0.447154	0.462121	0.477477	0.513514	0.485714	0.611111	0.555556	0.575		0.516629	0.991627	FALSE	FALSE	200		bin4	0.48062	0.538462	0.543478	0.492073	0.621622	0.446328	0.612613	0.390244	0.590476
bin5	0.411765	0.439024	0.747475	0.72381	0.419048	0.633333	0.504065	0.423423	0.581395	0.487179	0.587302	0.653439	0.583333	0.445299	0.54687	0.626016	0.419753	0.475177	0.869919	0.571429	0.540541	0.777778	0.611382	0.409524	0.455285	0.583333	0.47321	0.594595	0.609524	0.65873	0.603604	0.566667		0.563538	0.368793	FALSE	FALSE	250		bin5	0.434109	0.555556	0.753623	0.650407	0.681366	0.562731	0.587719	0.395083	0.62521
bin6	0.480392	0.447154	0.939078	0.87963	0.456854	0.75	0.617886	0.459459	0.696351	0.57265	0.579365	0.851852	0.804209	0.491667	0.690256	0.766667	0.645062	0.453901	0.934959	0.571429	0.684685	0.875	0.626016	0.437255	0.512195	0.712121	0.561404	0.810811	0.752381	0.698413	0.827578	0.575		0.661302	0.442227	FALSE	FALSE	300		bin6	0.418605	0.57265	0.913043	0.873322	0.642722	0.716248	0.692982	0.436508	0.666667
bin7	0.5	0.455285	1	0.944444	0.629902	0.833333	0.704878	0.468468	0.848626	0.709402	0.603175	0.944444	0.888889	0.619512	0.891304	0.891667	0.857143	0.58156	0.960317	0.551323	0.918919	0.972222	0.634146	0.490196	0.601626	0.825758	0.615385	0.954955	0.828571	0.7537	0.981481	0.583333		0.751374	0.0170169	TRUE	FALSE	350		bin7	0.465116	0.598291	1	0.930233	0.737719	0.925287	0.807018	0.539683	0.902521
bin8	0.504762	0.544715	1	1	0.893277	0.883333	0.737398	0.513514	0.950407	0.769231	0.626984	1	0.911111	0.650407	0.985507	0.991667	0.97619	0.695035	0.920635	0.527778	1	1	0.764228	0.590476	0.634146	0.863636	0.649573	1	0.914286	0.792593	1	0.6		0.80909	0.214832	FALSE	FALSE	400		bin8	0.418605	0.623932	1	0.953488	0.853126	0.988506	0.840683	0.587302	0.933333
bin9	0.533333	0.634146	1	1	0.928164	0.95	0.778659	0.504505	0.973157	0.82906	0.642276	1	0.911111	0.650407	1	1	1	0.723404	0.865079	0.457937	1	1	0.878049	0.666667	0.747967	0.886364	0.65812	1	0.911765	0.820875	1	0.658333		0.831543	0.662353	FALSE	FALSE	450		bin9	0.387597	0.649573	1	0.949206	0.885865	1	0.825576	0.582503	0.980937
bin10	0.550821	0.681067	1	1	0.943517	0.95303	0.715123	0.471678	0.977339	0.822302	0.651732	1	0.916402	0.61626	1	1	1	0.761787	0.829772	0.544444	1	1	0.868497	0.724251	0.765081	0.91892	0.667953	1	0.872718	0.847701	1	0.673197		0.836675	0.670511	FALSE	FALSE	500		bin10	0.387225	0.689717	1	0.955392	0.904947	1	0.834303	0.612221	0.961814
bin11	0.539683	0.616654	1	1	0.939394	0.942857	0.743475	0.45214	0.928402	0.783994	0.637924	0.980952	0.869408	0.568428	1	1	1	0.73577	0.786143	0.451821	1	1	0.877033	0.725298	0.782841	0.928904	0.695311	1	0.739583	0.816441	1	0.633333		0.817993	0.607055	FALSE	FALSE	550		bin11	0.353806	0.696833	1	0.953488	0.923077	0.964172	0.779028	0.619048	0.926677
bin12	0.6	0.674797	1	0.935185	0.939394	0.95	0.70151	0.432432	0.834297	0.752137	0.571429	0.885714	0.810606	0.463415	1	1	1	0.751773	0.722222	0.515152	1	1	0.878049	0.72381	0.8	0.954545	0.632479	1	0.59375	0.844444	1	0.65		0.800536	0.847555	FALSE	FALSE	600		bin12	0.283499	0.692308	1	0.968808	0.91318	0.867816	0.769188	0.65873	0.849471
bin13	0.552381	0.682927	0.989899	0.916667	0.941176	0.916667	0.639024	0.405405	0.726094	0.741341	0.571429	0.764706	0.765152	0.429675	1	1	1	0.716312	0.67983	0.545455	1	0.972222	0.902439	0.72381	0.8	0.954545	0.581197	1	0.447917	0.844444	1	0.683333		0.777939	0.673375	FALSE	FALSE	650		bin13	0.269841	0.666667	1	0.928571	0.91318	0.787356	0.780952	0.65873	0.838235
bin14	0.571429	0.674797	0.969697	0.87963	0.960784	0.9	0.590244	0.423423	0.70151	0.722222	0.571429	0.619727	0.727273	0.425	1	0.99187	1	0.666667	0.658537	0.525253	1	1	0.869919	0.714286	0.788618	0.954545	0.495726	1	0.378696	0.814815	1	0.708333		0.759513	0.656542	FALSE	FALSE	700		bin14	0.293651	0.666667	1	0.914175	0.948268	0.642022	0.798039	0.619048	0.740616
bin15	0.533333	0.674797	0.848485	0.861111	0.970291	0.816667	0.579365	0.486486	0.600465	0.684998	0.571429	0.555556	0.727273	0.418089	1	0.95935	1	0.659574	0.601626	0.515152	0.981982	1	0.853659	0.701681	0.788618	0.924242	0.452991	0.944444	0.365591	0.807407	1	0.725		0.737802	0.713536	FALSE	FALSE	750		bin15	0.293651	0.666667	0.913043	0.919601	0.938596	0.589635	0.764021	0.63289	0.699755
bin16	0.514286	0.634146	0.676768	0.786275	0.970588	0.783333	0.507937	0.486486	0.523256	0.484848	0.551495	0.360368	0.621212	0.406504	0.976375	0.967073	0.940476	0.624113	0.398374	0.525253	0.756757	0.88961	0.813008	0.59596	0.739837	0.830691	0.376068	0.833333	0.354839	0.785185	0.801802	0.725		0.663789	0.831109	FALSE	FALSE	800		bin16	0.309524	0.666667	0.706229	0.808666	0.923077	0.485876	0.685185	0.627907	0.670139
bin17	0.52381	0.609756	0.606116	0.745098	0.971148	0.523684	0.444444	0.459459	0.573643	0.333333	0.48062	0.309863	0.472868	0.380081	0.84127	0.912648	0.785714	0.588652	0.330488	0.525253	0.45045	0.769841	0.739837	0.59388	0.720935	0.749723	0.290598	0.666667	0.333333	0.772649	0.504505	0.741667		0.586001	0.68237	FALSE	FALSE	850		bin17	0.357143	0.641026	0.620155	0.729167	0.923077	0.395039	0.672923	0.611111	0.647135
bin18	0.504762	0.585366	0.558824	0.715686	0.95207	0.308967	0.444444	0.513514	0.55814	0.252525	0.44186	0.282828	0.364341	0.383333	0.579365	0.720721	0.547619	0.542707	0.341463	0.484848	0.369369	0.69697	0.658537	0.578431	0.591667	0.634921	0.239316	0.546296	0.311828	0.751938	0.414414	0.75		0.519596	0.254769	FALSE	FALSE	900		bin18	0.357143	0.623932	0.604651	0.697917	0.956803	0.276211	0.636386	0.515873	0.63369
bin19	0.514286	0.617886	0.519608	0.656863	0.942826	0.160819	0.451413	0.531532	0.538944	0.180036	0.434109	0.240336	0.372093	0.389744	0.471545	0.572573	0.464286	0.471014	0.382114	0.479798	0.324324	0.651515	0.642276	0.474747	0.474573	0.555556	0.316239	0.457143	0.219713	0.69338	0.36036	0.741667		0.478229	0.199274	FALSE	FALSE	950		bin19	0.380952	0.615385	0.578073	0.642137	0.972723	0.178571	0.620321	0.420635	0.677176
bin20	0.543723	0.633391	0.534343	0.646853	0.945238	0.106238	0.457204	0.509009	0.561969	0.182633	0.379897	0.233189	0.373062	0.413344	0.404628	0.439599	0.431115	0.47502	0.428697	0.489899	0.330502	0.635137	0.596572	0.407828	0.413364	0.554269	0.34188	0.408474	0.170635	0.638575	0.380907	0.705983		0.461662	0.437237	FALSE	FALSE	1000		bin20	0.426978	0.643567	0.51934	0.576897	0.951235	0.179654	0.601957	0.438995	0.689484
bin21	0.479292	0.607424	0.474574	0.605801	0.944631	0.0626781	0.409067	0.480927	0.528505	0.188672	0.371417	0.207912	0.400801	0.451407	0.318713	0.275692	0.39451	0.487033	0.481379	0.543124	0.32029	0.661111	0.593808	0.359477	0.443182	0.511682	0.352778	0.384013	0.166344	0.632848	0.384607	0.712346		0.444876	0.690166	FALSE	FALSE	1050		bin21	0.407843	0.620312	0.529405	0.523529	0.971176	0.166935	0.587908	0.402918	0.615575
bin22	0.485714	0.609756	0.494949	0.519608	0.895238	0.0526316	0.449771	0.441441	0.5	0.216216	0.429863	0.259259	0.410853	0.469636	0.26938	0.178284	0.357143	0.5	0.559621	0.519608	0.318068	0.662055	0.626016	0.385417	0.418803	0.511628	0.310391	0.308466	0.129032	0.463415	0.416074	0.683333		0.432865	0.756102	FALSE	FALSE	1100		bin22	0.386905	0.589744	0.526779	0.466106	0.95659	0.15218	0.663102	0.445183	0.63545
bin23	0.514286	0.609756	0.519608	0.460784	0.87963	0.1	0.463415	0.432432	0.483933	0.201754	0.387597	0.277778	0.395349	0.441437	0.255814	0.171171	0.357143	0.463124	0.579365	0.509804	0.324324	0.643116	0.585366	0.347222	0.393162	0.496124	0.350427	0.330423	0.129032	0.447154	0.438596	0.675		0.427004	0.822846	FALSE	FALSE	1150		bin23	0.452381	0.57265	0.518855	0.432331	0.908943	0.126437	0.607028	0.387597	0.644258
bin24	0.533333	0.569106	0.529412	0.490212	0.807558	0.1	0.422764	0.387387	0.492248	0.201754	0.387597	0.324074	0.403101	0.475203	0.255724	0.162162	0.321429	0.466667	0.579365	0.457143	0.342342	0.652778	0.528455	0.340166	0.4	0.472868	0.393162	0.30084	0.150538	0.480431	0.421053	0.675		0.422621	0.834299	FALSE	FALSE	1200		bin24	0.452381	0.57265	0.5	0.410256	0.846154	0.137931	0.470291	0.387597	0.62549
bin25	0.527778	0.560976	0.529412	0.472222	0.72973	0.15	0.454675	0.405405	0.507752	0.254386	0.387597	0.329894	0.372093	0.508333	0.261111	0.198156	0.333333	0.451852	0.587302	0.466667	0.387387	0.666667	0.487805	0.323529	0.377236	0.465116	0.435897	0.32381	0.182796	0.44697	0.377193	0.658333		0.425669	0.526797	FALSE	FALSE	1250		bin25	0.436508	0.561404	0.471014	0.395085	0.800045	0.12069	0.52381	0.387597	0.605882
bin26	0.527778	0.544715	0.5	0.342593	0.581825	0.15	0.487805	0.396396	0.496313	0.292082	0.310078	0.295238	0.378184	0.446748	0.222222	0.153846	0.309524	0.444444	0.634921	0.457143	0.445696	0.652778	0.406504	0.368627	0.260163	0.465116	0.350427	0.352381	0.166667	0.363636	0.201754	0.566667		0.392883	0.255058	FALSE	FALSE	1300		bin26	0.460317	0.538462	0.318841	0.178862	0.672515	0.132184	0.537831	0.410853	0.612325
bin27	0.518519	0.560976	0.362745	0.175926	0.310644	0.1	0.540447	0.432432	0.487398	0.306306	0.263566	0.247619	0.39055	0.491667	0.251852	0.210526	0.256173	0.426248	0.576074	0.504762	0.444444	0.583333	0.382114	0.309863	0.195122	0.418605	0.295547	0.285714	0.21875	0.371212	0.0900901	0.416667		0.357059	0.0680957	FALSE	FALSE	1350		bin27	0.444444	0.547009	0.217391	0.117202	0.341484	0.143678	0.509259	0.418605	0.373094
bin28	0.592593	0.528455	0.362745	0.112169	0.141488	0.116667	0.463202	0.435185	0.517094	0.297297	0.271318	0.294118	0.395349	0.512393	0.288889	0.217274	0.296296	0.475177	0.52381	0.514574	0.311376	0.541667	0.382114	0.300059	0.130081	0.325203	0.342105	0.304762	0.229167	0.398485	0.0900901	0.45		0.348788	0.027433	TRUE	FALSE	1400		bin28	0.439024	0.538462	0.197101	0.0762861	0.271164	0.172414	0.438867	0.403101	0.33324
bin29	0.62037	0.528455	0.352941	0.114286	0.126118	0.25	0.466667	0.527778	0.547908	0.345187	0.255814	0.27451	0.406238	0.520325	0.325926	0.239316	0.34127	0.489362	0.515873	0.489247	0.304762	0.625	0.414634	0.292929	0.130081	0.306427	0.377193	0.342857	0.379368	0.393939	0.108108	0.491667		0.372017	0.00170067	TRUE	FALSE	1450		bin29	0.428571	0.504274	0.228019	0.0757576	0.203641	0.189655	0.486486	0.426357	0.333333
bin30	0.62963	0.552846	0.441176	0.141534	0.0874926	0.403509	0.439721	0.574074	0.433333	0.438596	0.379845	0.303922	0.456441	0.541057	0.503704	0.264957	0.47619	0.468085	0.468254	0.522235	0.361905	0.513889	0.414634	0.296086	0.162602	0.382114	0.517544	0.380952	0.56129	0.409091	0.0810811	0.445299		0.407909	5.26873e-05	TRUE	TURE	1500		bin30	0.412698	0.463964	0.251852	0.0930568	0.143939	0.224138	0.486229	0.434109	0.285714
bin31	0.738624	0.575	0.575758	0.314286	0.148148	0.508772	0.45	0.574074	0.380285	0.570175	0.534884	0.392157	0.534884	0.598171	0.637037	0.324786	0.5	0.453901	0.428571	0.52425	0.59709	0.333333	0.439024	0.454861	0.219512	0.484127	0.684211	0.52381	0.677778	0.424242	0.0630631	0.410256		0.471096	3.26458e-05	TRUE	TURE	1550		bin31	0.396825	0.407018	0.365056	0.122655	0.0817551	0.287356	0.518783	0.44186	0.382294
bin32	0.788515	0.637877	0.646465	0.530575	0.194444	0.596491	0.487805	0.533333	0.440753	0.614035	0.604651	0.490196	0.595238	0.634146	0.700805	0.42735	0.547619	0.438791	0.380952	0.573419	0.654233	0.291667	0.512195	0.666667	0.378419	0.399729	0.801802	0.628571	0.677778	0.454545	0.297297	0.34188		0.530258	6.62754e-05	TRUE	TURE	1600		bin32	0.360399	0.40404	0.454545	0.263566	0.0768215	0.287356	0.537037	0.465116	0.462441
bin33	0.823708	0.576577	0.722766	0.585859	0.243386	0.762281	0.466667	0.495238	0.47619	0.601852	0.627907	0.575758	0.671835	0.674797	0.710145	0.564103	0.597443	0.438791	0.388889	0.662962	0.620435	0.458333	0.479675	0.729167	0.470085	0.402826	0.761261	0.681746	0.766667	0.44697	0.558559	0.368421		0.575353	0.00013275	TRUE	TURE	1650		bin33	0.355324	0.294886	0.507752	0.449612	0.133482	0.343254	0.527778	0.426357	0.612613
bin34	0.828318	0.537037	0.678298	0.69697	0.352381	0.783333	0.437805	0.52381	0.540854	0.694444	0.677187	0.673203	0.689922	0.691057	0.755556	0.641026	0.62359	0.453901	0.380952	0.596686	0.615444	0.597222	0.504065	0.78125	0.692308	0.46746	0.761905	0.733722	0.792939	0.488724	0.738739	0.412281		0.620075	0.000226918	TRUE	TURE	1700		bin34	0.385077	0.307692	0.614895	0.573643	0.307722	0.35119	0.514014	0.426357	0.666667
bin35	0.796931	0.582633	0.602659	0.830065	0.489916	0.75	0.487805	0.575397	0.532724	0.731481	0.674603	0.686275	0.666667	0.644715	0.753704	0.65812	0.661836	0.492435	0.388889	0.614719	0.666667	0.724074	0.536585	0.851389	0.798504	0.487179	0.719892	0.705882	0.815897	0.534884	0.765766	0.438596		0.64584	0.00120466	TRUE	FALSE	1750		bin35	0.383124	0.257971	0.662515	0.720093	0.414462	0.369048	0.45045	0.434109	0.691799
bin36	0.715219	0.604628	0.662222	0.855429	0.596359	0.766667	0.504268	0.62963	0.569919	0.752521	0.714286	0.735294	0.679771	0.603049	0.769204	0.717949	0.770635	0.408857	0.428571	0.555556	0.701073	0.695833	0.569106	0.858785	0.85	0.521368	0.800493	0.708683	0.82809	0.542636	0.871872	0.464912		0.670403	0.000251997	TRUE	TURE	1800		bin36	0.385433	0.154545	0.618836	0.777033	0.436828	0.445887	0.403654	0.480251	0.679552
bin37	0.684343	0.607407	0.647947	0.875	0.686869	0.75	0.542313	0.62037	0.60629	0.794118	0.714286	0.735294	0.650407	0.6	0.777778	0.747863	0.807602	0.460222	0.452381	0.555556	0.770334	0.67735	0.569106	0.876543	0.821138	0.526316	0.657222	0.733333	0.833333	0.55814	0.935185	0.518018		0.681002	0.000295573	TRUE	TURE	1850		bin37	0.436364	0.11597	0.617386	0.800039	0.555714	0.446429	0.416667	0.404762	0.62549
bin38	0.644444	0.637846	0.642292	0.915995	0.837121	0.8	0.606838	0.59985	0.660819	0.841652	0.714286	0.757576	0.634146	0.601709	0.701316	0.716667	0.866013	0.478261	0.436508	0.42328	0.75255	0.805556	0.585366	0.884501	0.829268	0.495726	0.474561	0.714286	0.807843	0.584567	0.944444	0.495495		0.684087	0.000249906	TRUE	TURE	1900		bin38	0.52381	0.109921	0.648353	0.853659	0.566138	0.410714	0.443644	0.428571	0.529437
bin39	0.566667	0.619986	0.687879	0.880287	0.848485	0.8	0.612236	0.63964	0.614652	0.790557	0.730159	0.752525	0.585366	0.608637	0.643105	0.733333	0.91634	0.456522	0.460317	0.428571	0.698413	0.825	0.585366	0.869565	0.827846	0.586585	0.339181	0.714286	0.836508	0.587302	0.952381	0.477477		0.677349	0.000236772	TRUE	TURE	1950		bin39	0.616667	0.0750916	0.722222	0.783333	0.468137	0.39881	0.431145	0.428571	0.527599
bin40	0.5	0.649524	0.695906	0.825123	0.858586	0.783333	0.632479	0.63964	0.634921	0.731624	0.733837	0.698925	0.590244	0.606072	0.563063	0.728632	0.924603	0.481481	0.428571	0.428571	0.724074	0.779762	0.616667	0.863448	0.825	0.617886	0.279985	0.733333	0.735043	0.595238	0.971429	0.432432		0.66592	0.000169006	TRUE	TURE	2000		bin40	0.666667	0.0833333	0.672113	0.765073	0.409314	0.395038	0.486229	0.420635	0.433333
bin41	0.5	0.700855	0.537037	0.762133	0.850877	0.766667	0.649573	0.657658	0.673295	0.726377	0.669048	0.673477	0.583119	0.63172	0.510101	0.717949	0.759259	0.540741	0.428571	0.420635	0.840686	0.754762	0.616667	0.835714	0.827846	0.617202	0.486772	0.72549	0.558081	0.595238	0.970291	0.486486		0.658573	1.06739e-05	TRUE	TURE	2050		bin41	0.666667	0.0914141	0.550245	0.648148	0.411765	0.362966	0.486486	0.460317	0.311111
bin42	0.555556	0.769231	0.45098	0.746439	0.816425	0.8	0.647764	0.666667	0.726295	0.81532	0.624241	0.643678	0.533894	0.639847	0.602151	0.675214	0.710317	0.555556	0.452381	1	0.822222	0.75	0.591667	0.826797	0.82771	0.643411	0.662698	0.739736	0.657576	0.576815	0.966978	0.473684		0.686602	2.30791e-07	TRUE	TURE	2100		bin42	0.166667	0.17037	0.4875	0.490741	0.501089	0.329116	0.539592	0.436508	0.244663
bin43	0.611111	0.777778	0.411765	0.696923	0.841053	0.666667	0.623171	0.63964	0.65233	0.769063	0.62695	0.650625	0.537657	0.701448	0.533333	0.612011	0.811111	0.557971	0.555556	1	0.698834	0.555556	0.555556	0.810924	0.807207	0.658915	0.916667	0.736201	0.722222	0.567172	0.964696	0.464912		0.679219	2.03816e-07	TRUE	TURE	2150		bin43	0	0.31746	0.271429	0.436687	0.447868	0.368056	0.570175	0.436508	0.259031
bin44	0.5	0.711111	0.360294	0.555556	0.78268	0.55	0.655556	0.567568	0.707231	0.733333	0.648029	0.653846	0.588889	0.761528	0.517652	0.54386	0.783333	0.604016	0.650794	1	0.578704	1	0.552632	0.84127	0.790476	0.63289	1	0.741762	0.625	0.651852	0.901675	0.45704		0.676518	2.78755e-08	TRUE	TURE	2200		bin44	0	0.285714	0.214286	0.357858	0.350427	0.40996	0.552632	0.444444	0.301146
bin45	0.333333	0.666667	0.369444	0.472222	0.776471	0.55	0.634096	0.486486	0.703704	0.790476	0.527969	0.635897	0.621182	0.856926	0.511905	0.477477	0.833333	0.672921	0.690476	1	0.47619	1	0.605263	0.914141	0.77451	0.591395	1	0.784291	0.652778	0.703704	0.849953	0.487179		0.670325	1.26541e-08	TRUE	TURE	2250		bin45	0	0.111111	0.214286	0.357858	0.322222	0.333333	0.539829	0.420635	0.329365
bin46	0	0.710317	0.266667	0.547446	0.730769	0.5	0.554805	0.468468	0.683317	0.77381	0.454406	0.613333	0.674603	0.892788	0.467654	0.453704	1	0.722329	0.704878	1	0.5	1	0.682197	0.909091	0.647059	0.558585	1	0.788889	0.644444	0.678956	0.83179	0.504274		0.655143	6.16026e-08	TRUE	TURE	2300		bin46	NaN	0.0666667	0.327839	0.27619	0.345238	0.34058	0.550551	0.379878	0.337302
bin47	0	0.666667	0.29304	0.564286	0.728632	0.474561	0.560279	0.468468	0.60039	0.7	0.459743	0.566239	0.65812	0.866667	0.450483	0.579365	1	0.737374	0.675	0.333333	0.6	1	0.646465	0.867725	0.520202	0.563025	1	0.800341	0.566667	0.637351	0.756313	0.487179		0.619622	1.35851e-07	TRUE	TURE	2350		bin47	NaN	0.2	0.3663	0.205808	0.301587	0.318182	0.580952	0.388596	0.358974
bin48	NaN	0.777778	0.25641	0.52729	0.560269	0.425926	0.530139	0.43994	0.595861	0.7	0.464286	0.582612	0.653846	0.827839	0.37518	0.514557	1	0.777988	0.691667	0	0.6	1	0.578629	0.761905	0.4375	0.524658	1	0.812441	0.583333	0.633333	0.649832	0.435897		0.603842	1.97769e-07	TRUE	TURE	2400		bin48	NaN	0.2	0.410256	0.140977	0.301587	0.306514	0.604891	0.348348	0.38141
bin49	NaN	1	0.237179	0.579657	0.345238	0.372549	0.508772	0.444444	0.592765	0.7	0.533827	0.650794	0.640933	0.911616	0.462482	0.489583	NaN	0.721212	0.7	0	0.35	1	0.527599	0.742857	0.408871	0.515152	NaN	0.813333	0.75	0.610043	0.477778	0.407051		0.568749	1.68946e-06	TRUE	TURE	2450		bin49	NaN	0.25	0.384615	0.12	0.244444	0.365497	0.594595	0.33324	0.397233
bin50	NaN	1	0.277778	0.590476	0.285714	0.488889	0.476977	0.437133	0.604412	0.618519	0.563636	0.677778	0.553485	0.909091	0.539683	0.432524	NaN	0.67807	0.710135	0	0.25	1	0.488889	0.75	0.352107	0.553427	NaN	0.861111	0.444444	0.567544	0.525641	0.433333		0.554165	4.24145e-06	TRUE	TURE	2500		bin50	NaN	0.25	0.384615	0.130435	0.2	0.368421	0.57411	0.346405	0.430702
AVE																																			AVE
																																						time (ms)
																																					TURE	50
																																					TURE	100
																																					TURE	150
																																					TURE	200
																																					TURE	250
																																					TURE	300
																																					TURE	350
																																					TURE	400
																																					TURE	450
																																					TURE	500
																																					TURE	550
																																					TURE	600
																																					TURE	650
																																					TURE	700
																																					TURE	750
																																					TURE	800
																																					TURE	850
																																					TURE	900
																																					TURE	950
																																					TURE	1000
																																					TURE	1050
																																					TURE	1100
																																					TURE	1150
																																					TURE	1200
																																					TURE	1250
																																					TURE	1300
																																					TURE	1350
																																					TURE	1400
																																					TURE	1450
																																					TURE	1500
																																					TURE	1550
																																					TURE	1600
																																					TURE	1650
																																					TURE	1700
																																					TURE	1750
																																					TURE	1800
																																					TURE	1850
																																					TURE	1900
																																					TURE	1950
																																					TURE	2000
																																					TURE	2050
																																					TURE	2100
																																					TURE	2150
																																					TURE	2200
																																					TURE	2250
																																					TURE	2300
																																					TURE	2350
																																					TURE	2400
																																					TURE	2450
																																					TURE	2500
[truncated: 24 more columns]
